# Supplementary material
Source: publisher site journal article supplement (https://www.spandidos-publications.com/4467/downloadSupplementary)
Supplement: Supplementary file 1 [file downloadSupplementary]

## Sheet: Table S2
Table SII. All single parameter physicochemical values assigned to all TRA CDR3 AA sequences recovered from TCGA-BRCA exome files. These values were used to generate the TCGA-BRCA, TRA results of Table S4.
Filename	CDR3	Sample Type	Receptor	length	fraction_tiny	fraction_small	fraction_aromatic	fraction_charged	fraction_positive	fraction_negative	fraction_expanding	fraction_disorder_promoting	molecular_weight	isoelectric_point	ncpr, net charge per residue	mean_hydropathy	uversky_hydropathy	ppii_propensity	gravy	aromaticity	kappa	omega	delta	instability_index	secondary_structure_helix	secondary_structure_turn	secondary_structure_sheet
TCGA-A8-A09T	CDNNNDMRF	Primary Tumor	TRA	9	0.111111	0.666667	0.111111	0.333333	0.111111	0.222222	0.333333	0.333333	1128.2	4.20782	-0.111111	2.85556	0.317284	0.285556	-1.64444	0.111111	2.85556	0.0497665	0.0410508	21.9111	0.111111	0.333333	0.111111
TCGA-A2-A0CU	CIVTTGANSKLTF	Primary Tumor	TRA	13	0.538462	0.692308	0.0769231	0.0769231	0.0769231	0	0.0769231	0.538462	1354.57	8.22223	0.0769231	5.18462	0.576068	0.305385	0.684615	0.0769231	5.18462	0.976728	0.00850263	-13.9308	0.307692	0.230769	0.153846
TCGA-A2-A0CU	CGTDRDDKIIF	Primary Tumor	TRA	11	0.272727	0.545455	0.0909091	0.454545	0.181818	0.272727	0.454545	0.636364	1282.42	4.42889	-0.0909091	3.98182	0.442424	0.317273	-0.518182	0.0909091	3.98182	0.353757	0.00493786	-20.9182	0.272727	0.0909091	0
TCGA-AR-A0TY	CISVLSRSSNTGKLIF	Primary Tumor	TRA	16	0.4375	0.5625	0.0625	0.125	0.125	0	0.125	0.5	1725.02	9.50775	0.125	5.11875	0.56875	0.293125	0.61875	0.0625	5.11875	0.281667	0.00556187	39.6875	0.375	0.375	0.125
TCGA-AR-A0TY	CAATGRAGNMLTF	Primary Tumor	TRA	13	0.615385	0.692308	0.0769231	0.0769231	0.0769231	0	0.0769231	0.615385	1312.52	8.24969	0.0769231	4.97692	0.552991	0.283077	0.476923	0.0769231	4.97692	0.995249	0.00928254	5.66154	0.153846	0.230769	0.384615
TCGA-AR-A0TY	CAVGAVDSGNTPLVF	Primary Tumor	TRA	15	0.466667	0.866667	0.0666667	0.0666667	0	0.0666667	0.133333	0.533333	1449.63	3.79987	-0.0666667	5.46	0.606667	0.330667	0.96	0.0666667	5.46	0.285092	0.00914141	-10.4867	0.333333	0.333333	0.2
TCGA-OL-A5RW	CCVLLHRQSRGAAGNKLTF	Primary Tumor	TRA	19	0.421053	0.526316	0.105263	0.157895	0.157895	0	0.157895	0.578947	2074.43	9.69611	0.157895	4.58421	0.509357	0.297895	0.0842105	0.0526316	4.58421	0.27425	0.0112073	49.9895	0.263158	0.210526	0.263158
TCGA-D8-A1X7	CAASHTSGTYKYIF	Primary Tumor	TRA	14	0.571429	0.571429	0.285714	0.0714286	0.0714286	0	0.0714286	0.642857	1548.72	8.18414	0.0714286	4.52143	0.502381	0.29	0.0214286	0.214286	4.52143	0.945517	0.00826959	-2.16429	0.285714	0.214286	0.142857
TCGA-B6-A0IC	CAESIKGSSNTGKLIF	Primary Tumor	TRA	16	0.5	0.5625	0.0625	0.1875	0.125	0.0625	0.1875	0.625	1654.88	8.19781	0.0625	4.575	0.508333	0.3075	0.075	0.0625	4.575	0.236992	0.0176184	1.6125	0.25	0.375	0.1875
TCGA-OL-A5S0	CALNQAGTALIF	Primary Tumor	TRA	12	0.5	0.583333	0.0833333	0	0	0	0	0.5	1221.43	5.51813	0	5.725	0.636111	0.304167	1.225	0.0833333	5.725	-1	0	-4.19167	0.333333	0.166667	0.416667
TCGA-A2-A04W	CVVIGGGSNYKLTF	Primary Tumor	TRA	14	0.428571	0.642857	0.142857	0.0714286	0.0714286	0	0.0714286	0.428571	1457.69	8.19745	0.0714286	5.25714	0.584127	0.275714	0.757143	0.142857	5.25714	0.945517	0.00826959	24.2786	0.428571	0.357143	0.0714286
TCGA-A2-A04W	CAYTGANSKLTF	Primary Tumor	TRA	12	0.583333	0.666667	0.166667	0.0833333	0.0833333	0	0.0833333	0.583333	1275.43	8.19745	0.0833333	4.61667	0.512963	0.290833	0.116667	0.166667	4.61667	0.965909	0.00861111	-8.85	0.25	0.25	0.25
TCGA-A2-A04W	CAYRSPNNNDMRF	Primary Tumor	TRA	13	0.230769	0.615385	0.153846	0.230769	0.153846	0.0769231	0.307692	0.461538	1587.74	8.22186	0.0769231	3.13846	0.348718	0.346923	-1.36154	0.153846	3.13846	0.0304067	0.0177835	58.0231	0.153846	0.384615	0.153846
TCGA-A2-A04W	CAALRDQGAQKLVF	Primary Tumor	TRA	14	0.357143	0.5	0.0714286	0.214286	0.142857	0.0714286	0.214286	0.642857	1519.77	8.22211	0.0714286	4.72857	0.525397	0.345	0.228571	0.0714286	4.72857	0.10548	0.0130166	10.9143	0.285714	0.0714286	0.357143
TCGA-A2-A04W	CAASKREGNYGQNFVF	Primary Tumor	TRA	16	0.375	0.5625	0.1875	0.1875	0.125	0.0625	0.1875	0.5625	1790.95	8.19757	0.0625	3.9125	0.434722	0.30625	-0.5875	0.1875	3.9125	0.696325	0.0147599	9.74375	0.25	0.3125	0.1875
TCGA-A2-A04W	CTTASWVTGFTGGGNKLTF	Primary Tumor	TRA	19	0.631579	0.736842	0.157895	0.0526316	0.0526316	0	0.0526316	0.631579	1948.16	8.22223	0.0526316	4.69474	0.521637	0.264737	0.194737	0.157895	4.69474	0.864993	0.00675839	31.7684	0.263158	0.315789	0.105263
TCGA-A8-A092	CVVVNYQLIW	Primary Tumor	TRA	10	0.1	0.5	0.2	0	0	0	0	0.1	1236.48	5.5174	0	5.92	0.657778	0.335	1.42	0.2	5.92	-1	0	1.46	0.7	0.1	0.1
TCGA-A8-A092	CQTQRCTSVLPYNTNAGKSTF	Primary Tumor	TRA	21	0.47619	0.666667	0.0952381	0.0952381	0.0952381	0	0.142857	0.619048	2319.57	8.90326	0.0952381	3.90476	0.433862	0.35	-0.595238	0.0952381	3.90476	0.178959	0.00845843	17.6714	0.190476	0.285714	0.0952381
TCGA-A8-A092	CCVLLPRGGDSSYKLIF	Primary Tumor	TRA	17	0.352941	0.529412	0.117647	0.176471	0.117647	0.0588235	0.235294	0.470588	1871.23	8.04523	0.0588235	5.12941	0.569935	0.317647	0.629412	0.117647	5.12941	0.145469	0.0155893	31.8	0.411765	0.294118	0.176471
TCGA-A7-A26F	CAVAPGRGFQKLVF	Primary Tumor	TRA	14	0.357143	0.571429	0.142857	0.142857	0.142857	0	0.214286	0.571429	1492.79	9.50775	0.142857	5.18571	0.57619	0.362857	0.685714	0.142857	5.18571	0.10548	0.0118438	10.9143	0.357143	0.214286	0.214286
TCGA-A7-A26F	CAGQVYNTDKLIF	Primary Tumor	TRA	13	0.307692	0.538462	0.153846	0.153846	0.0769231	0.0769231	0.153846	0.461538	1471.68	5.82794	0	4.71538	0.523932	0.320769	0.215385	0.153846	4.71538	0.830755	0.00395833	-21.9615	0.384615	0.153846	0.153846
TCGA-BH-A0BD	CALVRQAGTALIF	Primary Tumor	TRA	13	0.461538	0.538462	0.0769231	0.0769231	0.0769231	0	0.0769231	0.538462	1362.64	8.24969	0.0769231	5.87692	0.652991	0.319231	1.37692	0.0769231	5.87692	1	0.009149	17.5154	0.384615	0.0769231	0.384615
TCGA-BH-A0BD	CCCLLLCCGNARLMF	Primary Tumor	TRA	15	0.466667	0.533333	0.0666667	0.0666667	0.0666667	0	0.0666667	0.2	1663.15	7.83173	0.0666667	6.22	0.691111	0.259333	1.72	0.0666667	6.22	0.920366	0.0079798	16.5133	0.333333	0.133333	0.4
TCGA-BH-A0BD	CGTEIRGSNTGKLIF	Primary Tumor	TRA	15	0.466667	0.533333	0.0666667	0.2	0.133333	0.0666667	0.2	0.6	1595.82	8.22223	0.0666667	4.45333	0.494815	0.289333	-0.0466667	0.0666667	4.45333	0.151213	0.0165039	1.05333	0.266667	0.333333	0.133333
TCGA-BH-A0BD	CAVRETSGSRLTF	Primary Tumor	TRA	13	0.538462	0.615385	0.0769231	0.230769	0.153846	0.0769231	0.230769	0.692308	1426.6	8.24969	0.0769231	4.43846	0.493162	0.296154	-0.0615385	0.0769231	4.43846	0.0869945	0.0125253	33.5385	0.230769	0.230769	0.230769
TCGA-BH-A0BD	CAVRETSGSRLTF	Primary Tumor	TRA	13	0.538462	0.615385	0.0769231	0.230769	0.153846	0.0769231	0.230769	0.692308	1426.6	8.24969	0.0769231	4.43846	0.493162	0.296154	-0.0615385	0.0769231	4.43846	0.0869945	0.0125253	33.5385	0.230769	0.230769	0.230769
TCGA-BH-A0BD	CAVRETSGSRLTF	Primary Tumor	TRA	13	0.538462	0.615385	0.0769231	0.230769	0.153846	0.0769231	0.230769	0.692308	1426.6	8.24969	0.0769231	4.43846	0.493162	0.296154	-0.0615385	0.0769231	4.43846	0.0869945	0.0125253	33.5385	0.230769	0.230769	0.230769
TCGA-BH-A0BD	CAVRETSGSRLTF	Primary Tumor	TRA	13	0.538462	0.615385	0.0769231	0.230769	0.153846	0.0769231	0.230769	0.692308	1426.6	8.24969	0.0769231	4.43846	0.493162	0.296154	-0.0615385	0.0769231	4.43846	0.0869945	0.0125253	33.5385	0.230769	0.230769	0.230769
TCGA-BH-A0BD	CAVRETSGSRLTF	Primary Tumor	TRA	13	0.538462	0.615385	0.0769231	0.230769	0.153846	0.0769231	0.230769	0.692308	1426.6	8.24969	0.0769231	4.43846	0.493162	0.296154	-0.0615385	0.0769231	4.43846	0.0869945	0.0125253	33.5385	0.230769	0.230769	0.230769
TCGA-BH-A0BD	CAVRETSGSRLTF	Primary Tumor	TRA	13	0.538462	0.615385	0.0769231	0.230769	0.153846	0.0769231	0.230769	0.692308	1426.6	8.24969	0.0769231	4.43846	0.493162	0.296154	-0.0615385	0.0769231	4.43846	0.0869945	0.0125253	33.5385	0.230769	0.230769	0.230769
TCGA-BH-A0BD	CAVRETSGSRLTF	Primary Tumor	TRA	13	0.538462	0.615385	0.0769231	0.230769	0.153846	0.0769231	0.230769	0.692308	1426.6	8.24969	0.0769231	4.43846	0.493162	0.296154	-0.0615385	0.0769231	4.43846	0.0869945	0.0125253	33.5385	0.230769	0.230769	0.230769
TCGA-BH-A0BD	CAVRETSGSRLTF	Primary Tumor	TRA	13	0.538462	0.615385	0.0769231	0.230769	0.153846	0.0769231	0.230769	0.692308	1426.6	8.24969	0.0769231	4.43846	0.493162	0.296154	-0.0615385	0.0769231	4.43846	0.0869945	0.0125253	33.5385	0.230769	0.230769	0.230769
TCGA-BH-A0BD	CAVRETSGSRLTF	Primary Tumor	TRA	13	0.538462	0.615385	0.0769231	0.230769	0.153846	0.0769231	0.230769	0.692308	1426.6	8.24969	0.0769231	4.43846	0.493162	0.296154	-0.0615385	0.0769231	4.43846	0.0869945	0.0125253	33.5385	0.230769	0.230769	0.230769
TCGA-BH-A0BD	CAVRETSGSRLTF	Primary Tumor	TRA	13	0.538462	0.615385	0.0769231	0.230769	0.153846	0.0769231	0.230769	0.692308	1426.6	8.24969	0.0769231	4.43846	0.493162	0.296154	-0.0615385	0.0769231	4.43846	0.0869945	0.0125253	33.5385	0.230769	0.230769	0.230769
TCGA-BH-A0BD	CAVRETSGSRLTF	Primary Tumor	TRA	13	0.538462	0.615385	0.0769231	0.230769	0.153846	0.0769231	0.230769	0.692308	1426.6	8.24969	0.0769231	4.43846	0.493162	0.296154	-0.0615385	0.0769231	4.43846	0.0869945	0.0125253	33.5385	0.230769	0.230769	0.230769
TCGA-BH-A0BD	CARGVNQFYF	Primary Tumor	TRA	10	0.3	0.5	0.3	0.1	0.1	0	0.1	0.4	1204.36	8.22198	0.1	4.59	0.51	0.291	0.09	0.3	4.59	0.769316	0.00833333	18.031	0.4	0.2	0.1
TCGA-BH-A0BD	CVVIDNYGQNFVF	Primary Tumor	TRA	13	0.153846	0.615385	0.230769	0.0769231	0	0.0769231	0.0769231	0.230769	1517.7	3.79987	-0.0769231	5.23077	0.581197	0.3	0.730769	0.230769	5.23077	1	0.009149	-14.6615	0.538462	0.230769	0
TCGA-A2-A0YC	CAGTFVYNQGGKLIF	Primary Tumor	TRA	15	0.4	0.533333	0.2	0.0666667	0.0666667	0	0.0666667	0.466667	1617.87	8.19745	0.0666667	5.05333	0.561481	0.286667	0.553333	0.2	5.05333	0.920366	0.0079798	-1.24667	0.4	0.266667	0.133333
TCGA-A2-A0YC	CAVRRGGNKLTF	Primary Tumor	TRA	12	0.416667	0.583333	0.0833333	0.25	0.25	0	0.25	0.583333	1321.55	10.8604	0.25	4.26667	0.474074	0.299167	-0.233333	0.0833333	4.26667	0.0894573	0.0149405	75.975	0.25	0.25	0.166667
TCGA-BH-A0BF	CAVRDRGNNARLMF	Primary Tumor	TRA	14	0.285714	0.571429	0.0714286	0.285714	0.214286	0.0714286	0.285714	0.5	1622.87	10.2609	0.142857	4.1	0.455556	0.304286	-0.4	0.0714286	4.1	0.0815991	0.0103082	-8.22857	0.214286	0.214286	0.285714
TCGA-BH-A0BF	CAVRDLTPVSGGYNKLIF	Primary Tumor	TRA	18	0.333333	0.611111	0.111111	0.166667	0.111111	0.0555556	0.222222	0.5	1953.26	8.19733	0.0555556	4.88889	0.54321	0.334444	0.388889	0.111111	4.88889	0.237524	0.0103178	30.7222	0.388889	0.277778	0.166667
TCGA-BH-A0BF	CALRDLTPVSVGYNKLIF	Primary Tumor	TRA	18	0.277778	0.555556	0.111111	0.166667	0.111111	0.0555556	0.222222	0.444444	2009.37	8.19733	0.0555556	5.12222	0.569136	0.340556	0.622222	0.111111	5.12222	0.237524	0.0103178	29.85	0.444444	0.222222	0.222222
TCGA-BH-A0BF	CAWRDLTPVSVGYNKLIF	Primary Tumor	TRA	18	0.277778	0.555556	0.166667	0.166667	0.111111	0.0555556	0.222222	0.444444	2082.42	8.19733	0.0555556	4.86111	0.540123	0.341111	0.361111	0.166667	4.86111	0.237524	0.0103178	19.15	0.444444	0.222222	0.166667
TCGA-BH-A0BF	CAVRDLTPVSGGYNKLIF	Primary Tumor	TRA	18	0.333333	0.611111	0.111111	0.166667	0.111111	0.0555556	0.222222	0.5	1953.26	8.19733	0.0555556	4.88889	0.54321	0.334444	0.388889	0.111111	4.88889	0.237524	0.0103178	30.7222	0.388889	0.277778	0.166667
TCGA-BH-A0BF	CAVRDLTPVSGGYNKLIF	Primary Tumor	TRA	18	0.333333	0.611111	0.111111	0.166667	0.111111	0.0555556	0.222222	0.5	1953.26	8.19733	0.0555556	4.88889	0.54321	0.334444	0.388889	0.111111	4.88889	0.237524	0.0103178	30.7222	0.388889	0.277778	0.166667
TCGA-BH-A0BF	CAVRDLTPVSGGYNKLIF	Primary Tumor	TRA	18	0.333333	0.611111	0.111111	0.166667	0.111111	0.0555556	0.222222	0.5	1953.26	8.19733	0.0555556	4.88889	0.54321	0.334444	0.388889	0.111111	4.88889	0.237524	0.0103178	30.7222	0.388889	0.277778	0.166667
TCGA-BH-A0BF	CALSEADGGATNKLIF	Primary Tumor	TRA	16	0.5	0.625	0.0625	0.1875	0.0625	0.125	0.1875	0.625	1609.8	4.37018	-0.0625	4.88125	0.542361	0.298125	0.38125	0.0625	4.88125	0.156779	0.0532118	18.6125	0.25	0.25	0.375
TCGA-BH-A0BF	CKAAGNKLTF	Primary Tumor	TRA	10	0.5	0.6	0.1	0.2	0.2	0	0.2	0.6	1052.25	9.31415	0.2	4.53	0.503333	0.324	0.03	0.1	4.53	0.0329153	0.00222222	28.04	0.2	0.2	0.3
TCGA-BH-A0BF	CKAAGNKLTF	Primary Tumor	TRA	10	0.5	0.6	0.1	0.2	0.2	0	0.2	0.6	1052.25	9.31415	0.2	4.53	0.503333	0.324	0.03	0.1	4.53	0.0329153	0.00222222	28.04	0.2	0.2	0.3
TCGA-BH-A0BF	CLLPSFGNEKLTF	Primary Tumor	TRA	13	0.307692	0.461538	0.153846	0.153846	0.0769231	0.0769231	0.230769	0.461538	1468.72	5.99432	0	4.89231	0.54359	0.326923	0.392308	0.153846	4.89231	0.0869945	0.00395833	50.1077	0.384615	0.307692	0.307692
TCGA-BH-A0BF	CILRGGVTSYDKVIF	Primary Tumor	TRA	15	0.333333	0.533333	0.133333	0.2	0.133333	0.0666667	0.2	0.466667	1670.97	8.19733	0.0666667	5.23333	0.581481	0.302	0.733333	0.133333	5.23333	0.290505	0.0126571	36.3867	0.466667	0.2	0.0666667
TCGA-BH-A0BF	CCCLLLCCVGGNEKLTF	Primary Tumor	TRA	17	0.470588	0.588235	0.0588235	0.117647	0.0588235	0.0588235	0.117647	0.294118	1819.26	5.96783	0	5.81176	0.645752	0.270588	1.31176	0.0588235	5.81176	1	0.00269587	15.8412	0.352941	0.176471	0.294118
TCGA-BH-A0BF	CCVLLHRRDNARLMF	Primary Tumor	TRA	15	0.2	0.4	0.133333	0.266667	0.2	0.0666667	0.266667	0.4	1847.24	9.02338	0.133333	4.72667	0.525185	0.294667	0.226667	0.0666667	4.72667	0.29284	0.0136055	42.4933	0.333333	0.0666667	0.333333
TCGA-BH-A0BF	CCCLLLCWGFYSGNTPLVF	Primary Tumor	TRA	19	0.421053	0.578947	0.210526	0	0	0	0.0526316	0.263158	2139.58	5.49799	0	5.83684	0.648538	0.277895	1.33684	0.210526	5.83684	0.864993	0	34.8374	0.473684	0.263158	0.210526
TCGA-BH-A0BF	CDVFLCFRYMTTDSWGKWQF	Primary Tumor	TRA	20	0.3	0.45	0.3	0.2	0.1	0.1	0.2	0.45	2533.9	5.94586	0	4.435	0.492778	0.2915	-0.065	0.3	4.435	0.078548	0.0286111	32.32	0.4	0.1	0.1
TCGA-BH-A0BF	CAVRDAVKAAGNKLTF	Primary Tumor	TRA	16	0.4375	0.6875	0.0625	0.25	0.1875	0.0625	0.25	0.625	1663.94	9.31244	0.125	4.76875	0.529861	0.34	0.26875	0.0625	4.76875	0.0807968	0.0125033	19.475	0.25	0.125	0.3125
TCGA-BH-A0BF	CAVRDAVKAAGNKLTF	Primary Tumor	TRA	16	0.4375	0.6875	0.0625	0.25	0.1875	0.0625	0.25	0.625	1663.94	9.31244	0.125	4.76875	0.529861	0.34	0.26875	0.0625	4.76875	0.0807968	0.0125033	19.475	0.25	0.125	0.3125
TCGA-BH-A0BF	CAVAGGGGGNKLTF	Primary Tumor	TRA	14	0.642857	0.785714	0.0714286	0.0714286	0.0714286	0	0.0714286	0.642857	1251.41	8.22223	0.0714286	4.98571	0.553968	0.256429	0.485714	0.0714286	4.98571	0.945517	0.00826959	58.1429	0.214286	0.428571	0.214286
TCGA-EW-A1P7	CCERRAEGTYKYIF	Primary Tumor	TRA	14	0.357143	0.357143	0.214286	0.357143	0.214286	0.142857	0.357143	0.571429	1738.98	8.03326	0.0714286	3.82143	0.424603	0.324286	-0.678571	0.214286	3.82143	0.0764108	0.0101661	44.1357	0.285714	0.0714286	0.214286
TCGA-EW-A1P7	CCERRAEGTYKYIF	Primary Tumor	TRA	14	0.357143	0.357143	0.214286	0.357143	0.214286	0.142857	0.357143	0.571429	1738.98	8.03326	0.0714286	3.82143	0.424603	0.324286	-0.678571	0.214286	3.82143	0.0764108	0.0101661	44.1357	0.285714	0.0714286	0.214286
TCGA-EW-A1P7	CCERRAEGTYKYIF	Primary Tumor	TRA	14	0.357143	0.357143	0.214286	0.357143	0.214286	0.142857	0.357143	0.571429	1738.98	8.03326	0.0714286	3.82143	0.424603	0.324286	-0.678571	0.214286	3.82143	0.0764108	0.0101661	44.1357	0.285714	0.0714286	0.214286
TCGA-EW-A1P7	CCERRAEGTYKYIF	Primary Tumor	TRA	14	0.357143	0.357143	0.214286	0.357143	0.214286	0.142857	0.357143	0.571429	1738.98	8.03326	0.0714286	3.82143	0.424603	0.324286	-0.678571	0.214286	3.82143	0.0764108	0.0101661	44.1357	0.285714	0.0714286	0.214286
TCGA-EW-A1P7	CCERRAEGTYKYIF	Primary Tumor	TRA	14	0.357143	0.357143	0.214286	0.357143	0.214286	0.142857	0.357143	0.571429	1738.98	8.03326	0.0714286	3.82143	0.424603	0.324286	-0.678571	0.214286	3.82143	0.0764108	0.0101661	44.1357	0.285714	0.0714286	0.214286
TCGA-EW-A1P7	CCERRAEGTYKYIF	Primary Tumor	TRA	14	0.357143	0.357143	0.214286	0.357143	0.214286	0.142857	0.357143	0.571429	1738.98	8.03326	0.0714286	3.82143	0.424603	0.324286	-0.678571	0.214286	3.82143	0.0764108	0.0101661	44.1357	0.285714	0.0714286	0.214286
TCGA-EW-A1P7	CAASEGNSGYSTLTF	Primary Tumor	TRA	15	0.666667	0.733333	0.133333	0.0666667	0	0.0666667	0.0666667	0.666667	1507.58	3.99957	-0.0666667	4.48667	0.498519	0.264	-0.0133333	0.133333	4.48667	0.982605	0.00886364	19.08	0.2	0.4	0.266667
TCGA-EW-A1P7	CAAKLLGGDDKIIF	Primary Tumor	TRA	14	0.357143	0.5	0.0714286	0.285714	0.142857	0.142857	0.285714	0.571429	1463.74	5.9527	0	5.20714	0.578571	0.314286	0.707143	0.0714286	5.20714	0.0815991	0.030155	-0.0928571	0.357143	0.142857	0.285714
TCGA-EW-A1P7	CAMRKPALPVNSP	Primary Tumor	TRA	13	0.307692	0.692308	0	0.153846	0.153846	0	0.384615	0.615385	1383.68	9.50775	0.153846	4.38462	0.487179	0.494615	-0.115385	0	4.38462	0.0479029	0.0313449	75.8769	0.153846	0.384615	0.307692
TCGA-EW-A1P7	CAMRKPALPVNSP	Primary Tumor	TRA	13	0.307692	0.692308	0	0.153846	0.153846	0	0.384615	0.615385	1383.68	9.50775	0.153846	4.38462	0.487179	0.494615	-0.115385	0	4.38462	0.0479029	0.0313449	75.8769	0.153846	0.384615	0.307692
TCGA-EW-A1P7	CVLLHRQTTSNNAGNMLTF	Primary Tumor	TRA	19	0.368421	0.578947	0.105263	0.0526316	0.0526316	0	0.0526316	0.473684	2120.41	8.25861	0.0526316	4.47895	0.497661	0.29	-0.0210526	0.0526316	4.47895	1	0.00812096	17.6684	0.263158	0.263158	0.263158
TCGA-EW-A1P7	CVLLHRQTTSNNAGNMLTF	Primary Tumor	TRA	19	0.368421	0.578947	0.105263	0.0526316	0.0526316	0	0.0526316	0.473684	2120.41	8.25861	0.0526316	4.47895	0.497661	0.29	-0.0210526	0.0526316	4.47895	1	0.00812096	17.6684	0.263158	0.263158	0.263158
TCGA-EW-A1P7	CTTASWVSNAGKSTF	Primary Tumor	TRA	15	0.666667	0.8	0.133333	0.0666667	0.0666667	0	0.0666667	0.666667	1559.7	8.22223	0.0666667	4.49333	0.499259	0.296	-0.00666667	0.133333	4.49333	0.920366	0.0079798	27.9733	0.2	0.333333	0.133333
TCGA-BH-A6R9	CAVGAGSGGSNYKLTF	Primary Tumor	TRA	16	0.625	0.75	0.125	0.0625	0.0625	0	0.0625	0.625	1531.69	8.19745	0.0625	4.76875	0.529861	0.261875	0.26875	0.125	4.76875	0.90155	0.00766888	8.88125	0.25	0.4375	0.1875
TCGA-BH-A6R9	CSVLLCSKQEGGSEKLVF	Primary Tumor	TRA	18	0.388889	0.5	0.0555556	0.222222	0.111111	0.111111	0.222222	0.555556	1927.25	6.12836	0	4.83889	0.537654	0.313333	0.338889	0.0555556	4.83889	0.361071	0.016529	46.1167	0.333333	0.277778	0.277778
TCGA-BH-A6R9	CAGQLGNEKLTF	Primary Tumor	TRA	12	0.416667	0.5	0.0833333	0.166667	0.0833333	0.0833333	0.166667	0.583333	1280.45	5.99432	0	4.4	0.488889	0.3025	-0.1	0.0833333	4.4	0.71572	0.00448413	5.3	0.25	0.25	0.333333
TCGA-D8-A1XB	CAVRALRSNDYKLSF	Primary Tumor	TRA	15	0.333333	0.533333	0.133333	0.266667	0.2	0.0666667	0.266667	0.533333	1743	9.31073	0.133333	4.36	0.484444	0.31	-0.14	0.133333	4.36	0.0596989	0.0266274	45.8067	0.333333	0.2	0.266667
TCGA-D8-A1XB	CAVRALRSNDYKLSF	Primary Tumor	TRA	15	0.333333	0.533333	0.133333	0.266667	0.2	0.0666667	0.266667	0.533333	1743	9.31073	0.133333	4.36	0.484444	0.31	-0.14	0.133333	4.36	0.0596989	0.0266274	45.8067	0.333333	0.2	0.266667
TCGA-D8-A1XB	CAVRALRSNDYKLSF	Primary Tumor	TRA	15	0.333333	0.533333	0.133333	0.266667	0.2	0.0666667	0.266667	0.533333	1743	9.31073	0.133333	4.36	0.484444	0.31	-0.14	0.133333	4.36	0.0596989	0.0266274	45.8067	0.333333	0.2	0.266667
TCGA-BH-A0BC	CVVSETVGSQGNLIF	Primary Tumor	TRA	15	0.4	0.666667	0.0666667	0.0666667	0	0.0666667	0.0666667	0.466667	1552.75	3.99969	-0.0666667	5.34	0.593333	0.3	0.84	0.0666667	5.34	0.982605	0.00886364	18.6667	0.4	0.333333	0.133333
TCGA-BH-A0BC	CAVSGTGGFKTIF	Primary Tumor	TRA	13	0.615385	0.692308	0.153846	0.0769231	0.0769231	0	0.0769231	0.615385	1287.48	8.22223	0.0769231	5.36923	0.596581	0.274615	0.869231	0.153846	5.36923	0.976728	0.00850263	-5.9	0.307692	0.307692	0.0769231
TCGA-A1-A0SE	CAVSALDSNYQLIW	Primary Tumor	TRA	14	0.357143	0.571429	0.142857	0.0714286	0	0.0714286	0.0714286	0.428571	1582.77	3.79987	-0.0714286	5.07857	0.564286	0.309286	0.578571	0.142857	5.07857	1	0.00928193	23.0429	0.428571	0.214286	0.285714
TCGA-EW-A1J5	CRLSPTMYSGGGADGLTF	Primary Tumor	TRA	18	0.555556	0.666667	0.111111	0.111111	0.0555556	0.0555556	0.166667	0.666667	1833.05	5.82867	0	4.56111	0.50679	0.288889	0.0611111	0.111111	4.56111	0.386596	0.0174786	58.1444	0.222222	0.388889	0.222222
TCGA-EW-A1J5	CAPQGGATNKLIF	Primary Tumor	TRA	13	0.461538	0.615385	0.0769231	0.0769231	0.0769231	0	0.153846	0.615385	1319.53	8.22223	0.0769231	4.74615	0.52735	0.363846	0.246154	0.0769231	4.74615	0.233903	0.00850263	41.9462	0.230769	0.307692	0.230769
TCGA-EW-A1J5	CAPQGGATNKLIF	Primary Tumor	TRA	13	0.461538	0.615385	0.0769231	0.0769231	0.0769231	0	0.153846	0.615385	1319.53	8.22223	0.0769231	4.74615	0.52735	0.363846	0.246154	0.0769231	4.74615	0.233903	0.00850263	41.9462	0.230769	0.307692	0.230769
TCGA-EW-A1J5	CAVRDRITGGGNKLTF	Primary Tumor	TRA	16	0.4375	0.625	0.0625	0.25	0.1875	0.0625	0.25	0.625	1707.95	9.50409	0.125	4.31875	0.479861	0.295625	-0.18125	0.0625	4.31875	0.278125	0.00742196	26.6812	0.25	0.25	0.125
TCGA-EW-A1J5	CAVRDRITGGGNKLTF	Primary Tumor	TRA	16	0.4375	0.625	0.0625	0.25	0.1875	0.0625	0.25	0.625	1707.95	9.50409	0.125	4.31875	0.479861	0.295625	-0.18125	0.0625	4.31875	0.278125	0.00742196	26.6812	0.25	0.25	0.125
TCGA-A1-A0SG	CAVLVSGNTGKLIF	Primary Tumor	TRA	14	0.428571	0.642857	0.0714286	0.0714286	0.0714286	0	0.0714286	0.428571	1421.7	8.22223	0.0714286	5.77857	0.642063	0.292143	1.27857	0.0714286	5.77857	0.945517	0.00826959	-21.0357	0.428571	0.285714	0.214286
TCGA-A1-A0SG	CVVNKGNSSASKIIF	Primary Tumor	TRA	15	0.4	0.666667	0.0666667	0.133333	0.133333	0	0.133333	0.466667	1566.82	9.31415	0.133333	4.96	0.551111	0.324	0.46	0.0666667	4.96	0.24067	0.00482323	15.9533	0.333333	0.4	0.0666667
TCGA-A1-A0SG	CVVNKGNSSASKIIF	Primary Tumor	TRA	15	0.4	0.666667	0.0666667	0.133333	0.133333	0	0.133333	0.466667	1566.82	9.31415	0.133333	4.96	0.551111	0.324	0.46	0.0666667	4.96	0.24067	0.00482323	15.9533	0.333333	0.4	0.0666667
TCGA-AN-A0FK	CALPYYSGAGSYQLTF	Primary Tumor	TRA	16	0.5	0.5625	0.25	0	0	0	0.0625	0.5625	1740.93	5.51605	0	4.775	0.530556	0.31125	0.275	0.25	4.775	0.90155	0	31.5312	0.375	0.3125	0.25
TCGA-AN-A0FK	CFPQRGYGQNFVF	Primary Tumor	TRA	13	0.230769	0.461538	0.307692	0.0769231	0.0769231	0	0.153846	0.461538	1562.75	8.22198	0.0769231	4.22308	0.469231	0.336154	-0.276923	0.307692	4.22308	0.750084	0.009149	7.70769	0.384615	0.307692	0
TCGA-AN-A0FK	CAMREVPSGGGADGLTF	Primary Tumor	TRA	17	0.529412	0.705882	0.0588235	0.176471	0.0588235	0.117647	0.235294	0.705882	1667.86	4.37018	-0.0588235	4.65294	0.516993	0.313529	0.152941	0.0588235	4.65294	0.145185	0.0131157	39.4235	0.176471	0.352941	0.294118
TCGA-AN-A0FK	CALKPGNTPLVF	Primary Tumor	TRA	12	0.333333	0.666667	0.0833333	0.0833333	0.0833333	0	0.25	0.5	1259.52	8.22223	0.0833333	5.1	0.566667	0.411667	0.6	0.0833333	5.1	0.0894573	0.00861111	-18.3417	0.333333	0.333333	0.25
TCGA-AN-A0FK	CITVLGRMDSSYKLIF	Primary Tumor	TRA	16	0.3125	0.4375	0.125	0.1875	0.125	0.0625	0.1875	0.4375	1846.22	8.19733	0.0625	5.25625	0.584028	0.303125	0.75625	0.125	5.25625	0.306187	0.0121386	28.1438	0.4375	0.1875	0.1875
TCGA-A2-A0CQ	CATFSGNTGKLIF	Primary Tumor	TRA	13	0.538462	0.615385	0.153846	0.0769231	0.0769231	0	0.0769231	0.538462	1358.56	8.22223	0.0769231	5.1	0.566667	0.273846	0.6	0.153846	5.1	0.976728	0.00850263	-13.9308	0.307692	0.307692	0.153846
TCGA-A8-A09Q	CGRQMLLFTTVLSDNYGQNFVF	Primary Tumor	TRA	22	0.272727	0.5	0.181818	0.0909091	0.0454545	0.0454545	0.0909091	0.409091	2553.91	5.82867	0	4.78636	0.531818	0.285909	0.286364	0.181818	4.78636	0.538698	0.0162418	7.60909	0.409091	0.227273	0.181818
TCGA-A8-A09Q	CAVVPGVYYGNNRLAF	Primary Tumor	TRA	16	0.3125	0.6875	0.1875	0.0625	0.0625	0	0.125	0.375	1742.99	8.19733	0.0625	5.05	0.561111	0.328125	0.55	0.1875	5.05	0.323482	0.00766888	13.8	0.4375	0.3125	0.1875
TCGA-A8-A09Q	CLLLCSKYGQAAGNKLTF	Primary Tumor	TRA	18	0.444444	0.5	0.111111	0.111111	0.111111	0	0.111111	0.5	1930.29	8.85944	0.111111	4.95556	0.550617	0.297778	0.455556	0.111111	4.95556	0.407028	0.00735585	26.0056	0.333333	0.222222	0.333333
TCGA-A8-A09Q	CAVSLTGGGNKLTF	Primary Tumor	TRA	14	0.571429	0.714286	0.0714286	0.0714286	0.0714286	0	0.0714286	0.571429	1367.57	8.22223	0.0714286	5.07857	0.564286	0.268571	0.578571	0.0714286	5.07857	0.945517	0.00826959	34.45	0.285714	0.357143	0.214286
TCGA-A8-A09Q	CAVRDYTGGFKTIF	Primary Tumor	TRA	14	0.428571	0.571429	0.214286	0.214286	0.142857	0.0714286	0.214286	0.571429	1577.8	8.19733	0.0714286	4.72857	0.525397	0.295	0.228571	0.214286	4.72857	0.163533	0.0136974	-4.76429	0.357143	0.142857	0.0714286
TCGA-D8-A1JL	CLLPLCCERGRDDKIIF	Primary Tumor	TRA	17	0.235294	0.411765	0.0588235	0.352941	0.176471	0.176471	0.411765	0.470588	1994.4	6.10101	0	4.81176	0.534641	0.346471	0.311765	0.0588235	4.81176	0.0949722	0.00338754	17.0882	0.352941	0.117647	0.235294
TCGA-D8-A1JL	CAVNRAAGNKLSF	Primary Tumor	TRA	13	0.461538	0.692308	0.0769231	0.153846	0.153846	0	0.153846	0.538462	1350.55	9.50775	0.153846	4.66154	0.517949	0.308462	0.161538	0.0769231	4.66154	0.0709504	0.00315048	14.3846	0.230769	0.307692	0.307692
TCGA-D8-A1JL	CAVNRAAGNKLTF	Primary Tumor	TRA	13	0.461538	0.692308	0.0769231	0.153846	0.153846	0	0.153846	0.538462	1364.57	9.50775	0.153846	4.66923	0.518803	0.314615	0.169231	0.0769231	4.66923	0.0709504	0.00315048	23.8769	0.230769	0.230769	0.307692
TCGA-D8-A1JL	CAMRERDSNYQLIW	Primary Tumor	TRA	14	0.214286	0.357143	0.142857	0.285714	0.142857	0.142857	0.285714	0.5	1785.01	6.06256	0	3.67857	0.40873	0.330714	-0.821429	0.142857	3.67857	0.48303	0.00433059	17.6571	0.285714	0.142857	0.285714
TCGA-D8-A1JL	CAVSESGNQFYF	Primary Tumor	TRA	12	0.416667	0.583333	0.25	0.0833333	0	0.0833333	0.0833333	0.5	1351.44	3.99957	-0.0833333	4.525	0.502778	0.285833	0.025	0.25	4.525	0.954546	0.00902778	48.7925	0.333333	0.333333	0.166667
TCGA-D8-A1JL	CAVDLVDTDKLIF	Primary Tumor	TRA	13	0.230769	0.615385	0.0769231	0.307692	0.0769231	0.230769	0.307692	0.461538	1451.68	3.92999	-0.153846	5.46154	0.606838	0.324615	0.961538	0.0769231	5.46154	0.0523253	0.0401129	-38.5154	0.461538	0	0.230769
TCGA-D8-A1JL	CAELTQGGSEKLVF	Primary Tumor	TRA	14	0.428571	0.5	0.0714286	0.214286	0.0714286	0.142857	0.214286	0.642857	1481.67	4.53131	-0.0714286	4.65714	0.51746	0.315	0.157143	0.0714286	4.65714	0.307201	0.0110713	20.4071	0.285714	0.214286	0.357143
TCGA-D8-A1JL	CALSERNSGGSNYKLTF	Primary Tumor	TRA	17	0.470588	0.588235	0.117647	0.176471	0.117647	0.0588235	0.176471	0.588235	1847.01	8.19757	0.0588235	3.94706	0.438562	0.277647	-0.552941	0.117647	3.94706	0.393563	0.0122307	37.5235	0.235294	0.411765	0.235294
TCGA-D8-A1JL	CALSERNSGGSNYKLTF	Primary Tumor	TRA	17	0.470588	0.588235	0.117647	0.176471	0.117647	0.0588235	0.176471	0.588235	1847.01	8.19757	0.0588235	3.94706	0.438562	0.277647	-0.552941	0.117647	3.94706	0.393563	0.0122307	37.5235	0.235294	0.411765	0.235294
TCGA-A7-A425	CALSLLGGSEKLVF	Primary Tumor	TRA	14	0.428571	0.5	0.0714286	0.142857	0.0714286	0.0714286	0.142857	0.5	1436.71	5.99432	0	5.69286	0.63254	0.275714	1.19286	0.0714286	5.69286	0.922771	0.00354321	25.7929	0.428571	0.285714	0.428571
TCGA-AR-A0TZ	CLVGDISGAAGNKLTF	Primary Tumor	TRA	16	0.5	0.6875	0.0625	0.125	0.0625	0.0625	0.125	0.5625	1565.79	5.82867	0	5.225	0.580556	0.28125	0.725	0.0625	5.225	0.323482	0.0263636	22.7	0.3125	0.3125	0.25
TCGA-BH-A0DT	CCVLLPRMNRDDKIIF	Primary Tumor	TRA	16	0.125	0.4375	0.0625	0.3125	0.1875	0.125	0.375	0.375	1936.37	8.05841	0.0625	4.84375	0.538194	0.366875	0.34375	0.0625	4.84375	0.100586	0.0191742	1.375	0.375	0.125	0.1875
TCGA-BH-A0DT	CAVNALNSGYSTLTF	Primary Tumor	TRA	15	0.533333	0.733333	0.133333	0	0	0	0	0.466667	1560.73	5.5174	0	5.1	0.566667	0.271333	0.6	0.133333	5.1	-1	0	11.9	0.333333	0.333333	0.266667
TCGA-BH-A0DT	CGEHRGAAGNKLTF	Primary Tumor	TRA	14	0.5	0.571429	0.142857	0.214286	0.142857	0.0714286	0.214286	0.714286	1460.62	8.23114	0.0714286	3.94286	0.438095	0.281429	-0.557143	0.0714286	3.94286	0.145654	0.0163235	-0.0142857	0.142857	0.285714	0.285714
TCGA-BH-A0DT	CNEEDNYGQNFVF	Primary Tumor	TRA	13	0.153846	0.538462	0.230769	0.230769	0	0.230769	0.230769	0.384615	1578.61	3.57452	-0.230769	3.43077	0.381197	0.295385	-1.06923	0.230769	3.43077	0.702574	0.0606903	31.0308	0.307692	0.307692	0.153846
TCGA-BH-A0DT	CIGWDNYGQNFVF	Primary Tumor	TRA	13	0.230769	0.538462	0.307692	0.0769231	0	0.0769231	0.0769231	0.307692	1562.7	3.79987	-0.0769231	4.48462	0.498291	0.269231	-0.0153846	0.307692	4.48462	1	0.009149	0.630769	0.461538	0.307692	0
TCGA-BH-A0DT	CSGDNARLMF	Primary Tumor	TRA	10	0.4	0.6	0.1	0.2	0.1	0.1	0.2	0.5	1113.27	5.82941	0	4.51	0.501111	0.271	0.01	0.1	4.51	0.134895	0.0188889	9	0.2	0.3	0.3
TCGA-BH-A0DT	CAGVLETYKFVF	Primary Tumor	TRA	12	0.333333	0.5	0.25	0.166667	0.0833333	0.0833333	0.166667	0.416667	1376.62	5.99359	0	5.525	0.613889	0.305	1.025	0.25	5.525	0.268935	0.0204365	9.16667	0.5	0.0833333	0.25
TCGA-BH-A0DT	CAVREGETSGSRLTF	Primary Tumor	TRA	15	0.533333	0.6	0.0666667	0.266667	0.133333	0.133333	0.266667	0.733333	1612.76	6.13678	0	4.18667	0.465185	0.293333	-0.313333	0.0666667	4.18667	0.0817291	0.0301599	25.3733	0.2	0.266667	0.266667
TCGA-BH-A0DT	CALSEFRTSYDKVIF	Primary Tumor	TRA	15	0.333333	0.466667	0.2	0.266667	0.133333	0.133333	0.266667	0.533333	1779.02	6.06183	0	4.72667	0.525185	0.312667	0.226667	0.2	4.72667	0.0610283	0.00699776	26.64	0.4	0.133333	0.2
TCGA-BH-A0DT	CVVNHSGGGADGLTF	Primary Tumor	TRA	15	0.533333	0.8	0.133333	0.0666667	0	0.0666667	0.0666667	0.6	1433.55	5.07648	-0.0666667	4.9	0.544444	0.244	0.4	0.0666667	4.9	0.982605	0.00886364	17.6667	0.266667	0.4	0.133333
TCGA-BH-A0DT	CLSMYFCDNNNDMRF	Primary Tumor	TRA	15	0.2	0.533333	0.2	0.2	0.0666667	0.133333	0.2	0.266667	1873.12	4.20782	-0.0666667	4.10667	0.456296	0.272	-0.393333	0.2	4.10667	0.399917	0.0277329	45.7733	0.266667	0.266667	0.2
TCGA-BH-A0DT	CAIMDSNYQLIW	Primary Tumor	TRA	12	0.25	0.416667	0.166667	0.0833333	0	0.0833333	0.0833333	0.333333	1456.68	3.79987	-0.0833333	4.95833	0.550926	0.32	0.458333	0.166667	4.95833	0.954546	0.00902778	25.2167	0.416667	0.166667	0.25
TCGA-BH-A0DT	CAIMDSNYQLIW	Primary Tumor	TRA	12	0.25	0.416667	0.166667	0.0833333	0	0.0833333	0.0833333	0.333333	1456.68	3.79987	-0.0833333	4.95833	0.550926	0.32	0.458333	0.166667	4.95833	0.954546	0.00902778	25.2167	0.416667	0.166667	0.25
TCGA-BH-A0DT	CAVRDSNYQLIW	Primary Tumor	TRA	12	0.25	0.5	0.166667	0.166667	0.0833333	0.0833333	0.166667	0.416667	1467.65	5.82867	0	4.4	0.488889	0.321667	-0.1	0.166667	4.4	0.71572	0.00448413	25.2167	0.416667	0.166667	0.166667
TCGA-BH-A0DT	CAVRDSNYQLIW	Primary Tumor	TRA	12	0.25	0.5	0.166667	0.166667	0.0833333	0.0833333	0.166667	0.416667	1467.65	5.82867	0	4.4	0.488889	0.321667	-0.1	0.166667	4.4	0.71572	0.00448413	25.2167	0.416667	0.166667	0.166667
TCGA-BH-A0DT	CWRGSQGGKLIF	Primary Tumor	TRA	12	0.416667	0.416667	0.166667	0.166667	0.166667	0	0.166667	0.583333	1351.58	9.50775	0.166667	4.4	0.488889	0.283333	-0.1	0.166667	4.4	0.0916276	0.00222222	34.0083	0.333333	0.333333	0.0833333
TCGA-BH-A0DT	CWRGSQGGKLIF	Primary Tumor	TRA	12	0.416667	0.416667	0.166667	0.166667	0.166667	0	0.166667	0.583333	1351.58	9.50775	0.166667	4.4	0.488889	0.283333	-0.1	0.166667	4.4	0.0916276	0.00222222	34.0083	0.333333	0.333333	0.0833333
TCGA-BH-A0DT	CAVRAAGNKLTF	Primary Tumor	TRA	12	0.5	0.666667	0.0833333	0.166667	0.166667	0	0.166667	0.583333	1250.47	9.50775	0.166667	4.975	0.552778	0.318333	0.475	0.0833333	4.975	0.0470281	0.00253968	25.0333	0.25	0.166667	0.333333
TCGA-BH-A0DT	CAVNDVGGFKTIF	Primary Tumor	TRA	13	0.384615	0.692308	0.153846	0.153846	0.0769231	0.0769231	0.153846	0.461538	1370.57	5.82867	0	5.3	0.588889	0.295385	0.8	0.153846	5.3	0.0709504	0.0321528	0.630769	0.384615	0.230769	0.0769231
TCGA-BH-A0DT	CRLSYLPLCSPAGRRALTF	Primary Tumor	TRA	19	0.421053	0.526316	0.105263	0.157895	0.157895	0	0.263158	0.578947	2124.53	9.69183	0.157895	4.81053	0.534503	0.352105	0.310526	0.105263	4.81053	0.0655509	0.0247156	89.5158	0.315789	0.263158	0.315789
TCGA-D8-A1JE	CGSSNTGKLIF	Primary Tumor	TRA	11	0.545455	0.636364	0.0909091	0.0909091	0.0909091	0	0.0909091	0.545455	1126.28	8.22223	0.0909091	4.78182	0.531313	0.267273	0.281818	0.0909091	4.78182	0.830136	0.00846167	-4.27273	0.272727	0.454545	0.0909091
TCGA-D8-A1JE	CASYAGNNRKLIW	Primary Tumor	TRA	13	0.384615	0.538462	0.153846	0.153846	0.153846	0	0.153846	0.461538	1495.7	9.31244	0.153846	4.16154	0.462393	0.305385	-0.338462	0.153846	4.16154	0.830755	0.0313449	14.3846	0.307692	0.307692	0.230769
TCGA-D8-A1JE	CAVTVPDDKIIF	Primary Tumor	TRA	12	0.25	0.666667	0.0833333	0.25	0.0833333	0.166667	0.333333	0.5	1320.55	4.20782	-0.0833333	5.44167	0.60463	0.4025	0.941667	0.0833333	5.44167	0.187383	0.0192637	-2.29167	0.416667	0.0833333	0.0833333
TCGA-E9-A54Y	CAVEGDRDDKIIF	Primary Tumor	TRA	13	0.230769	0.538462	0.0769231	0.461538	0.153846	0.307692	0.461538	0.615385	1480.64	4.22601	-0.153846	4.30769	0.478632	0.334615	-0.192308	0.0769231	4.30769	0.242665	0.0206449	-9.63077	0.307692	0.0769231	0.153846
TCGA-E9-A54Y	CAVEGDRDDKIIF	Primary Tumor	TRA	13	0.230769	0.538462	0.0769231	0.461538	0.153846	0.307692	0.461538	0.615385	1480.64	4.22601	-0.153846	4.30769	0.478632	0.334615	-0.192308	0.0769231	4.30769	0.242665	0.0206449	-9.63077	0.307692	0.0769231	0.153846
TCGA-AR-A1AP	CNERGPGSARQLTF	Primary Tumor	TRA	14	0.428571	0.571429	0.0714286	0.214286	0.142857	0.0714286	0.285714	0.714286	1535.68	8.24969	0.0714286	3.60714	0.400794	0.345	-0.892857	0.0714286	3.60714	0.0776093	0.0163235	25.7929	0.142857	0.357143	0.214286
TCGA-AR-A1AP	CFLLLPLGGYNKLIF	Primary Tumor	TRA	15	0.2	0.333333	0.2	0.0666667	0.0666667	0	0.133333	0.266667	1711.12	8.19745	0.0666667	5.86667	0.651852	0.301333	1.36667	0.2	5.86667	0.188148	0.0079798	34.8667	0.6	0.266667	0.333333
TCGA-AR-A1AP	CMTSLPPTSVPW	Primary Tumor	TRA	12	0.416667	0.75	0.0833333	0	0	0	0.25	0.583333	1318.56	5.51813	0	4.80833	0.534259	0.4675	0.308333	0.0833333	4.80833	0.183612	0	79.6833	0.25	0.416667	0.166667
TCGA-AR-A1AP	CRDTHSNSGYALNF	Primary Tumor	TRA	14	0.428571	0.642857	0.214286	0.142857	0.0714286	0.0714286	0.142857	0.571429	1584.67	6.73444	0	3.69286	0.410317	0.259286	-0.807143	0.142857	3.69286	0.974257	0.00354321	-1.33571	0.214286	0.357143	0.142857
TCGA-D8-A1XW	CAVSYTGTASKLTF	Primary Tumor	TRA	14	0.642857	0.714286	0.142857	0.0714286	0.0714286	0	0.0714286	0.642857	1448.64	8.19745	0.0714286	5.04286	0.560317	0.297857	0.542857	0.142857	5.04286	0.945517	0.00826959	-6.15714	0.285714	0.214286	0.214286
TCGA-D8-A1XW	CAGYTGTASKLTF	Primary Tumor	TRA	13	0.692308	0.692308	0.153846	0.0769231	0.0769231	0	0.0769231	0.692308	1319.48	8.19745	0.0769231	4.79231	0.532479	0.282308	0.292308	0.153846	4.79231	0.976728	0.00850263	-13.9308	0.230769	0.230769	0.230769
TCGA-D8-A1XW	CAVRDNYGQNFVF	Primary Tumor	TRA	13	0.230769	0.615385	0.230769	0.153846	0.0769231	0.0769231	0.153846	0.384615	1532.68	5.82867	0	4.35385	0.483761	0.297692	-0.146154	0.230769	4.35385	0.830755	0.00395833	-8.86154	0.384615	0.230769	0.0769231
TCGA-LL-A50Y	CILREDKSNDYKLSF	Primary Tumor	TRA	15	0.2	0.4	0.133333	0.4	0.2	0.2	0.4	0.533333	1831.05	6.11334	0	3.71333	0.412593	0.320667	-0.786667	0.133333	3.71333	0.0290486	0.00427609	36.5333	0.333333	0.2	0.2
TCGA-LL-A50Y	CSVWYNQEGQLIF	Primary Tumor	TRA	13	0.230769	0.384615	0.230769	0.0769231	0	0.0769231	0.0769231	0.384615	1586.76	3.99957	-0.0769231	4.53077	0.503419	0.312308	0.0307692	0.230769	4.53077	0.995249	0.00928254	18.2462	0.461538	0.230769	0.153846
TCGA-LL-A50Y	CALSDRGGFQKLVF	Primary Tumor	TRA	14	0.357143	0.5	0.142857	0.214286	0.142857	0.0714286	0.214286	0.571429	1540.78	8.22211	0.0714286	4.83571	0.537302	0.292857	0.335714	0.142857	4.83571	0.10548	0.0183076	0.585714	0.357143	0.214286	0.214286
TCGA-LL-A50Y	CALSDRGGFQKLVF	Primary Tumor	TRA	14	0.357143	0.5	0.142857	0.214286	0.142857	0.0714286	0.214286	0.571429	1540.78	8.22211	0.0714286	4.83571	0.537302	0.292857	0.335714	0.142857	4.83571	0.10548	0.0183076	0.585714	0.357143	0.214286	0.214286
TCGA-AR-A2LM	CAPSGSARQLTF	Primary Tumor	TRA	12	0.583333	0.666667	0.0833333	0.0833333	0.0833333	0	0.166667	0.75	1237.39	8.24969	0.0833333	4.53333	0.503704	0.353333	0.0333333	0.0833333	4.53333	0.0470281	0.00902778	67.6	0.166667	0.333333	0.25
TCGA-AR-A2LM	CAESIKGDMRF	Primary Tumor	TRA	11	0.363636	0.454545	0.0909091	0.363636	0.181818	0.181818	0.363636	0.636364	1256.45	6.06256	0	4.21818	0.468687	0.324545	-0.281818	0.0909091	4.21818	0.0229911	0.00394621	4.30909	0.181818	0.181818	0.272727
TCGA-A2-A0EO	CAVGAQGNTDKLIF	Primary Tumor	TRA	14	0.428571	0.642857	0.0714286	0.142857	0.0714286	0.0714286	0.142857	0.571429	1436.63	5.82867	0	4.89286	0.543651	0.315714	0.392857	0.0714286	4.89286	0.922771	0.00354321	-27.1	0.285714	0.214286	0.214286
TCGA-A2-A0EO	CAVGGPGTYKYIF	Primary Tumor	TRA	13	0.461538	0.615385	0.230769	0.0769231	0.0769231	0	0.153846	0.538462	1375.59	8.17523	0.0769231	4.94615	0.549573	0.333846	0.446154	0.230769	4.94615	0.214446	0.00850263	5.66154	0.384615	0.307692	0.0769231
TCGA-A2-A0EO	CAVPYSGNTPLVF	Primary Tumor	TRA	13	0.384615	0.769231	0.153846	0	0	0	0.153846	0.461538	1367.57	5.5174	0	5.22308	0.580342	0.386154	0.723077	0.153846	5.22308	0.0968171	0	10.9846	0.384615	0.384615	0.153846
TCGA-A2-A0EO	CLLYNFNKFYF	Primary Tumor	TRA	11	0.0909091	0.272727	0.454545	0.0909091	0.0909091	0	0.0909091	0.0909091	1471.72	8.17523	0.0909091	4.95455	0.550505	0.258182	0.454545	0.454545	4.95455	0.830136	0.00846167	64.1009	0.636364	0.181818	0.181818
TCGA-A2-A0EO	CASSGRGGSQGNLIF	Primary Tumor	TRA	15	0.6	0.666667	0.0666667	0.0666667	0.0666667	0	0.0666667	0.666667	1453.58	8.24969	0.0666667	4.49333	0.499259	0.256	-0.00666667	0.0666667	4.49333	1	0.00914141	31.92	0.2	0.533333	0.133333
TCGA-A2-A0EO	CAVQAWTGANNLFF	Primary Tumor	TRA	14	0.428571	0.642857	0.214286	0	0	0	0	0.428571	1541.73	5.51813	0	5.14286	0.571429	0.292857	0.642857	0.214286	5.14286	-1	0	-13.5786	0.357143	0.214286	0.285714
TCGA-A2-A0EO	CAVQAWTGANNLFF	Primary Tumor	TRA	14	0.428571	0.642857	0.214286	0	0	0	0	0.428571	1541.73	5.51813	0	5.14286	0.571429	0.292857	0.642857	0.214286	5.14286	-1	0	-13.5786	0.357143	0.214286	0.285714
TCGA-A2-A0EO	CAVWLTGGGNKLTF	Primary Tumor	TRA	14	0.5	0.642857	0.142857	0.0714286	0.0714286	0	0.0714286	0.5	1466.7	8.22223	0.0714286	5.07143	0.563492	0.269286	0.571429	0.142857	5.07143	0.945517	0.00826959	43.2643	0.357143	0.285714	0.214286
TCGA-B6-A0WW	CAGRTSYDKVIF	Primary Tumor	TRA	12	0.416667	0.583333	0.166667	0.25	0.166667	0.0833333	0.25	0.583333	1359.55	8.19733	0.0833333	4.55833	0.506481	0.3125	0.0583333	0.166667	4.55833	0.0894573	0.00883377	14.75	0.333333	0.166667	0.0833333
TCGA-B6-A0WW	CALSSYSGGGADGLTF	Primary Tumor	TRA	16	0.6875	0.75	0.125	0.0625	0	0.0625	0.0625	0.6875	1505.6	3.79987	-0.0625	4.9375	0.548611	0.234375	0.4375	0.125	4.9375	0.97589	0.00860953	33.9375	0.25	0.4375	0.25
TCGA-B6-A0WW	CALVHGSGNTGKLIF	Primary Tumor	TRA	15	0.466667	0.6	0.133333	0.0666667	0.0666667	0	0.0666667	0.533333	1516.76	8.23114	0.0666667	5.17333	0.574815	0.268667	0.673333	0.0666667	5.17333	0.920366	0.0079798	-25.88	0.333333	0.333333	0.2
TCGA-B6-A0WW	CALSEEGSGNTGKLIF	Primary Tumor	TRA	16	0.5	0.5625	0.0625	0.1875	0.0625	0.125	0.1875	0.625	1625.8	4.53131	-0.0625	4.58125	0.509028	0.2825	0.08125	0.0625	4.58125	0.294602	0.0590704	15.2562	0.25	0.375	0.3125
TCGA-B6-A0WW	CAVVPGDSSYKLIF	Primary Tumor	TRA	14	0.357143	0.642857	0.142857	0.142857	0.0714286	0.0714286	0.214286	0.5	1498.74	5.82794	0	5.32143	0.59127	0.351429	0.821429	0.142857	5.32143	0.10548	0.0232593	44.4929	0.428571	0.285714	0.142857
TCGA-B6-A0WW	CAVSDDRGFKTIF	Primary Tumor	TRA	13	0.384615	0.615385	0.153846	0.307692	0.153846	0.153846	0.307692	0.615385	1458.64	5.95343	0	4.6	0.511111	0.305385	0.1	0.153846	4.6	0.0569946	0.0418287	-14.6615	0.307692	0.153846	0.0769231
TCGA-D8-A27G	CAVKAAGNKLTF	Primary Tumor	TRA	12	0.5	0.666667	0.0833333	0.166667	0.166667	0	0.166667	0.583333	1222.46	9.31415	0.166667	5.025	0.558333	0.333333	0.525	0.0833333	5.025	0.0470281	0.00253968	22.6333	0.25	0.166667	0.333333
TCGA-D8-A27G	CIVRLPAFGNEKLTF	Primary Tumor	TRA	15	0.266667	0.466667	0.133333	0.2	0.133333	0.0666667	0.266667	0.466667	1708.03	8.22223	0.0666667	5.04	0.56	0.353333	0.54	0.133333	5.04	0.0550658	0.0126571	26.26	0.4	0.2	0.266667
TCGA-D8-A27G	CILPLAGGTSYGKLTF	Primary Tumor	TRA	16	0.5	0.5625	0.125	0.0625	0.0625	0	0.125	0.5625	1640.94	8.19745	0.0625	5.3	0.588889	0.31125	0.8	0.125	5.3	0.39778	0.00766888	27.65	0.375	0.3125	0.25
TCGA-BH-A1EW	CAPGLGNTPLVF	Primary Tumor	TRA	12	0.416667	0.75	0.0833333	0	0	0	0.166667	0.5	1188.4	5.51813	0	5.39167	0.599074	0.375833	0.891667	0.0833333	5.39167	0.0916276	0	11.0667	0.333333	0.416667	0.25
TCGA-BH-A1EW	CAVSWVNRDDKIIF	Primary Tumor	TRA	14	0.214286	0.571429	0.142857	0.285714	0.142857	0.142857	0.285714	0.428571	1665.91	5.95343	0	4.77857	0.530952	0.332143	0.278571	0.142857	4.77857	0.48303	0.00433059	-8.90714	0.428571	0.142857	0.0714286
TCGA-BH-A1EW	CAASVGRDDKIIF	Primary Tumor	TRA	13	0.384615	0.615385	0.0769231	0.307692	0.153846	0.153846	0.307692	0.615385	1394.6	5.95343	0	4.92308	0.547009	0.326154	0.423077	0.0769231	4.92308	0.364939	0.00483796	-10.3615	0.307692	0.153846	0.153846
TCGA-BH-A1EW	CAVSDPSGGYNKLIF	Primary Tumor	TRA	15	0.4	0.666667	0.133333	0.133333	0.0666667	0.0666667	0.2	0.533333	1570.76	5.82794	0	4.72667	0.525185	0.328667	0.226667	0.133333	4.72667	0.17495	0.0288636	34.8667	0.333333	0.4	0.133333
TCGA-BH-A1EW	CAIWTGGGNKLTF	Primary Tumor	TRA	13	0.538462	0.615385	0.153846	0.0769231	0.0769231	0	0.0769231	0.538462	1367.57	8.22223	0.0769231	4.84615	0.538462	0.271538	0.346154	0.153846	4.84615	0.976728	0.00850263	24.7692	0.307692	0.307692	0.153846
TCGA-BH-A1EW	CCEDPGWASGGSYIPTF	Primary Tumor	TRA	17	0.529412	0.705882	0.176471	0.117647	0	0.117647	0.235294	0.647059	1789.94	3.66595	-0.117647	4.39412	0.488235	0.343529	-0.105882	0.176471	4.39412	0.58103	0.0247795	31.9824	0.235294	0.411765	0.117647
TCGA-BH-A1EW	CCEDPGWASGGSYIPTF	Primary Tumor	TRA	17	0.529412	0.705882	0.176471	0.117647	0	0.117647	0.235294	0.647059	1789.94	3.66595	-0.117647	4.39412	0.488235	0.343529	-0.105882	0.176471	4.39412	0.58103	0.0247795	31.9824	0.235294	0.411765	0.117647
TCGA-BH-A1EW	CALSLNFGNEKLTF	Primary Tumor	TRA	14	0.357143	0.5	0.142857	0.142857	0.0714286	0.0714286	0.142857	0.428571	1556.78	5.99432	0	4.85714	0.539683	0.277857	0.357143	0.142857	4.85714	0.922771	0.00354321	-4.76429	0.357143	0.285714	0.357143
TCGA-BH-A1EW	CATGETSGSRLNF	Primary Tumor	TRA	13	0.615385	0.692308	0.0769231	0.153846	0.0769231	0.0769231	0.153846	0.692308	1342.43	5.99493	0	4.16154	0.462393	0.267692	-0.338462	0.0769231	4.16154	0.0709504	0.0321528	0.153846	0.153846	0.384615	0.230769
TCGA-BH-A1EW	CATESPGGSYIPTF	Primary Tumor	TRA	14	0.571429	0.714286	0.142857	0.0714286	0	0.0714286	0.214286	0.714286	1429.55	3.99957	-0.0714286	4.48571	0.498413	0.373571	-0.0142857	0.142857	4.48571	0.151168	0.00826959	83.7571	0.214286	0.428571	0.142857
TCGA-BH-A1EW	CIVRGRRGSQGNLIF	Primary Tumor	TRA	15	0.333333	0.466667	0.0666667	0.2	0.2	0	0.2	0.533333	1675.96	11.7003	0.2	4.48667	0.498519	0.293333	-0.0133333	0.0666667	4.48667	0.604317	0.0494949	37.72	0.333333	0.333333	0.0666667
TCGA-BH-A1EW	CAAHVYGQNFVF	Primary Tumor	TRA	12	0.333333	0.583333	0.333333	0	0	0	0	0.416667	1355.52	6.73102	0	5.18333	0.575926	0.290833	0.683333	0.25	5.18333	-1	0	-23.7917	0.416667	0.166667	0.166667
TCGA-BH-A1EW	CISVLISNFGNEKLTF	Primary Tumor	TRA	16	0.3125	0.5	0.125	0.125	0.0625	0.0625	0.125	0.375	1785.07	5.99432	0	5.2375	0.581944	0.293125	0.7375	0.125	5.2375	1	0.00292929	-2.91875	0.4375	0.3125	0.1875
TCGA-BH-A1EW	CAVQPTSGSRLTF	Primary Tumor	TRA	13	0.538462	0.692308	0.0769231	0.0769231	0.0769231	0	0.153846	0.692308	1366.54	8.24969	0.0769231	4.66154	0.517949	0.352308	0.161538	0.0769231	4.66154	0.0709504	0.00850263	48.3538	0.230769	0.307692	0.153846
TCGA-BH-A1EW	CATARTGNQFYF	Primary Tumor	TRA	12	0.5	0.583333	0.25	0.0833333	0.0833333	0	0.0833333	0.583333	1378.51	8.22198	0.0833333	4.25833	0.473148	0.294167	-0.241667	0.25	4.25833	0.954546	0.00902778	9.6175	0.25	0.166667	0.166667
TCGA-BH-A1EW	CSRPSESNFGNEKLTF	Primary Tumor	TRA	16	0.375	0.5625	0.125	0.25	0.125	0.125	0.3125	0.625	1815.96	6.13605	0	3.525	0.391667	0.3325	-0.975	0.125	3.525	0.120491	0.0133838	57.2688	0.1875	0.4375	0.1875
TCGA-BH-A1EW	CSSPSESNFGNEKLTF	Primary Tumor	TRA	16	0.4375	0.625	0.125	0.1875	0.0625	0.125	0.25	0.625	1746.85	4.53131	-0.0625	3.75625	0.417361	0.32375	-0.74375	0.125	3.75625	0.13375	0.0149795	72.6938	0.1875	0.5	0.1875
TCGA-BH-A1EW	CALSVLFGNEKLTF	Primary Tumor	TRA	14	0.357143	0.5	0.142857	0.142857	0.0714286	0.0714286	0.142857	0.428571	1541.81	5.99432	0	5.40714	0.600794	0.286429	0.907143	0.142857	5.40714	0.922771	0.00354321	5.97143	0.428571	0.214286	0.357143
TCGA-BH-A1EW	CAVGTNDMRF	Primary Tumor	TRA	10	0.4	0.7	0.1	0.2	0.1	0.1	0.2	0.5	1113.27	5.82941	0	4.56	0.506667	0.294	0.06	0.1	4.56	0.509756	0.0122222	-30.55	0.2	0.2	0.2
TCGA-BH-A1EW	CAVGVVGNDMRF	Primary Tumor	TRA	12	0.333333	0.75	0.0833333	0.166667	0.0833333	0.0833333	0.166667	0.416667	1267.48	5.82941	0	5.275	0.586111	0.294167	0.775	0.0833333	5.275	0.738051	0.00896825	-18.3417	0.333333	0.25	0.166667
TCGA-BH-A1EW	CAVSVGTSGTYKYIF	Primary Tumor	TRA	15	0.533333	0.666667	0.2	0.0666667	0.0666667	0	0.0666667	0.533333	1595.81	8.17523	0.0666667	5.14667	0.571852	0.293333	0.646667	0.2	5.14667	0.920366	0.0079798	-7.64667	0.4	0.266667	0.0666667
TCGA-BH-A1EW	CAGMDSNYQLIW	Primary Tumor	TRA	12	0.333333	0.5	0.166667	0.0833333	0	0.0833333	0.0833333	0.416667	1400.58	3.79987	-0.0833333	4.55	0.505556	0.298333	0.05	0.166667	4.55	0.954546	0.00902778	25.2167	0.333333	0.25	0.25
TCGA-BH-A1EW	CAANYGGATNKLIF	Primary Tumor	TRA	14	0.5	0.642857	0.142857	0.0714286	0.0714286	0	0.0714286	0.5	1442.64	8.19745	0.0714286	4.87857	0.542063	0.292143	0.378571	0.142857	4.87857	0.945517	0.00826959	6.08571	0.285714	0.285714	0.285714
TCGA-BH-A1EW	CVVNYTNAGKSTF	Primary Tumor	TRA	13	0.461538	0.769231	0.153846	0.0769231	0.0769231	0	0.0769231	0.461538	1403.56	8.19745	0.0769231	4.55385	0.505983	0.302308	0.0538462	0.153846	4.55385	0.976728	0.00850263	-11.7	0.307692	0.307692	0.0769231
TCGA-BH-A1EW	CAVLYNQGGKLIF	Primary Tumor	TRA	13	0.307692	0.461538	0.153846	0.0769231	0.0769231	0	0.0769231	0.384615	1425.69	8.19745	0.0769231	5.3	0.588889	0.301538	0.8	0.153846	5.3	0.976728	0.00850263	-0.138462	0.461538	0.230769	0.230769
TCGA-BH-A1EW	CILGPNQAGTALIF	Primary Tumor	TRA	14	0.428571	0.571429	0.0714286	0	0	0	0.0714286	0.5	1417.67	5.51813	0	5.6	0.622222	0.342857	1.1	0.0714286	5.6	0.991678	0	11.5929	0.357143	0.285714	0.285714
TCGA-BH-A1EW	CALHSGGYQKVTF	Primary Tumor	TRA	13	0.461538	0.538462	0.230769	0.0769231	0.0769231	0	0.0769231	0.615385	1410.6	8.20636	0.0769231	4.56923	0.507692	0.290769	0.0692308	0.153846	4.56923	0.976728	0.00850263	8.62308	0.307692	0.230769	0.153846
TCGA-BH-A1EW	CALHSGGYQKVTF	Primary Tumor	TRA	13	0.461538	0.538462	0.230769	0.0769231	0.0769231	0	0.0769231	0.615385	1410.6	8.20636	0.0769231	4.56923	0.507692	0.290769	0.0692308	0.153846	4.56923	0.976728	0.00850263	8.62308	0.307692	0.230769	0.153846
TCGA-BH-A1EW	CAVRDRGAAGGYQKVTF	Primary Tumor	TRA	17	0.470588	0.647059	0.117647	0.235294	0.176471	0.0588235	0.235294	0.705882	1799.02	9.31073	0.117647	4.26471	0.473856	0.318824	-0.235294	0.117647	4.26471	0.371641	0.00736262	-5.47647	0.235294	0.176471	0.176471
TCGA-BH-A1EW	CAVGRLRVGRILTGGGNKLTF	Primary Tumor	TRA	21	0.428571	0.571429	0.047619	0.190476	0.190476	0	0.190476	0.571429	2188.6	11.7126	0.190476	4.8381	0.537566	0.282857	0.338095	0.047619	4.8381	0.301914	0.0182732	36.5571	0.333333	0.285714	0.190476
TCGA-PE-A5DC	CAVSGGTSYGKLTF	Primary Tumor	TRA	14	0.642857	0.714286	0.142857	0.0714286	0.0714286	0	0.0714286	0.642857	1390.56	8.19745	0.0714286	4.90714	0.545238	0.267143	0.407143	0.142857	4.90714	0.945517	0.00826959	2.65714	0.285714	0.357143	0.142857
TCGA-PE-A5DC	CDNNNDMRF	Primary Tumor	TRA	9	0.111111	0.666667	0.111111	0.333333	0.111111	0.222222	0.333333	0.333333	1128.2	4.20782	-0.111111	2.85556	0.317284	0.285556	-1.64444	0.111111	2.85556	0.0497665	0.0410508	21.9111	0.111111	0.333333	0.111111
TCGA-A2-A0YI	CAVGAFNNARLMF	Primary Tumor	TRA	13	0.384615	0.615385	0.153846	0.0769231	0.0769231	0	0.0769231	0.384615	1413.67	8.24969	0.0769231	5.38462	0.598291	0.287692	0.884615	0.153846	5.38462	0.976728	0.00850263	-3.83077	0.307692	0.230769	0.384615
TCGA-A2-A0YI	CAAFSGSARQLTF	Primary Tumor	TRA	13	0.615385	0.615385	0.153846	0.0769231	0.0769231	0	0.0769231	0.692308	1358.52	8.24969	0.0769231	5.00769	0.55641	0.290769	0.507692	0.153846	5.00769	1	0.009149	33.5385	0.230769	0.230769	0.307692
TCGA-A2-A0YI	CALYNDMRF	Primary Tumor	TRA	9	0.222222	0.444444	0.222222	0.222222	0.111111	0.111111	0.222222	0.333333	1132.31	5.82867	0	4.5	0.5	0.287778	-4.93432e-17	0.222222	4.5	0.277874	0.0149444	0.511111	0.333333	0.111111	0.333333
TCGA-A2-A0YI	CAVSRSTSGSARQLTF	Primary Tumor	TRA	16	0.625	0.6875	0.0625	0.125	0.125	0	0.125	0.75	1670.85	10.3519	0.125	4.4625	0.495833	0.300625	-0.0375	0.0625	4.4625	0.249183	0.0051452	68.625	0.1875	0.3125	0.1875
TCGA-A2-A0YI	CATDYNNDMRF	Primary Tumor	TRA	11	0.272727	0.636364	0.181818	0.272727	0.0909091	0.181818	0.272727	0.454545	1349.45	4.20782	-0.0909091	3.45455	0.383838	0.294545	-1.04545	0.181818	3.45455	0.0714377	0.0366783	2.23636	0.181818	0.181818	0.181818
TCGA-A2-A0YI	CGYKGNAGNNRKLIW	Primary Tumor	TRA	15	0.333333	0.533333	0.133333	0.2	0.2	0	0.2	0.466667	1693.93	9.78705	0.2	3.59333	0.399259	0.296667	-0.906667	0.133333	3.59333	0.290505	0.0167424	-18.9667	0.266667	0.4	0.133333
TCGA-A2-A0YI	CAATDSNYQLIW	Primary Tumor	TRA	12	0.416667	0.583333	0.166667	0.0833333	0	0.0833333	0.0833333	0.5	1384.51	3.79987	-0.0833333	4.51667	0.501852	0.315	0.0166667	0.166667	4.51667	0.954546	0.00902778	25.2167	0.333333	0.166667	0.25
TCGA-A2-A0YI	CCVLLHRQSRGISSGSARQLTF	Primary Tumor	TRA	22	0.454545	0.5	0.0909091	0.136364	0.136364	0	0.136364	0.636364	2419.78	10.4129	0.136364	4.55909	0.506566	0.294545	0.0590909	0.0454545	4.55909	0.413333	0.0130425	59	0.272727	0.272727	0.181818
TCGA-A2-A0YI	CAVRASSGSARQLTF	Primary Tumor	TRA	15	0.6	0.666667	0.0666667	0.133333	0.133333	0	0.133333	0.733333	1553.74	10.3519	0.133333	4.68	0.52	0.308	0.18	0.0666667	4.68	0.24067	0.00482323	43.24	0.2	0.266667	0.266667
TCGA-A2-A0YI	CAAFSGSARQLTF	Primary Tumor	TRA	13	0.615385	0.615385	0.153846	0.0769231	0.0769231	0	0.0769231	0.692308	1358.52	8.24969	0.0769231	5.00769	0.55641	0.290769	0.507692	0.153846	5.00769	1	0.009149	33.5385	0.230769	0.230769	0.307692
TCGA-A2-A0YI	CSAVQAGTALIF	Primary Tumor	TRA	12	0.583333	0.666667	0.0833333	0	0	0	0	0.583333	1180.37	5.51813	0	5.98333	0.664815	0.314167	1.48333	0.0833333	5.98333	-1	0	2.09167	0.333333	0.166667	0.333333
TCGA-A2-A0YI	CSAVQAGTALIF	Primary Tumor	TRA	12	0.583333	0.666667	0.0833333	0	0	0	0	0.583333	1180.37	5.51813	0	5.98333	0.664815	0.314167	1.48333	0.0833333	5.98333	-1	0	2.09167	0.333333	0.166667	0.333333
TCGA-BH-A0AY	CALGANSGYALNF	Primary Tumor	TRA	13	0.538462	0.692308	0.153846	0	0	0	0	0.461538	1300.44	5.5174	0	5.14615	0.571795	0.253846	0.646154	0.153846	5.14615	-1	0	2.82308	0.307692	0.384615	0.384615
TCGA-BH-A0AY	CALGANSGYALNF	Primary Tumor	TRA	13	0.538462	0.692308	0.153846	0	0	0	0	0.461538	1300.44	5.5174	0	5.14615	0.571795	0.253846	0.646154	0.153846	5.14615	-1	0	2.82308	0.307692	0.384615	0.384615
TCGA-BH-A0AY	CAVQLPWGGGGSNYKLTF	Primary Tumor	TRA	18	0.444444	0.611111	0.166667	0.0555556	0.0555556	0	0.111111	0.555556	1898.14	8.19745	0.0555556	4.56111	0.50679	0.311111	0.0611111	0.166667	4.56111	0.407028	0.0070506	35.4889	0.333333	0.388889	0.166667
TCGA-BH-A0AY	CAMSPNAGGTSYGKLTF	Primary Tumor	TRA	17	0.588235	0.705882	0.117647	0.0588235	0.0588235	0	0.117647	0.647059	1704.92	8.19745	0.0588235	4.50588	0.500654	0.314706	0.00588235	0.117647	4.50588	0.38567	0.0073558	55.6471	0.176471	0.411765	0.235294
TCGA-BH-A0AY	CAVRDNQGGKLIF	Primary Tumor	TRA	13	0.307692	0.538462	0.0769231	0.230769	0.153846	0.0769231	0.230769	0.538462	1420.64	8.22211	0.0769231	4.49231	0.499145	0.316154	-0.00769231	0.0769231	4.49231	0.0869945	0.0125253	-0.138462	0.307692	0.230769	0.153846
TCGA-BH-A0AY	CCESSRGGNKLTF	Primary Tumor	TRA	13	0.538462	0.615385	0.0769231	0.230769	0.153846	0.0769231	0.230769	0.615385	1401.57	8.05853	0.0769231	3.96923	0.441026	0.276923	-0.530769	0.0769231	3.96923	0.0776324	0.0336792	71.2846	0.153846	0.384615	0.153846
TCGA-BH-A1EO	CAVSGIGFGNEKLTF	Primary Tumor	TRA	15	0.466667	0.6	0.133333	0.133333	0.0666667	0.0666667	0.133333	0.533333	1542.75	5.99432	0	5.08667	0.565185	0.278667	0.586667	0.133333	5.08667	0.999558	0.00320707	0.58	0.333333	0.333333	0.2
TCGA-BH-A1EO	CAVKDTDKLIF	Primary Tumor	TRA	11	0.272727	0.545455	0.0909091	0.363636	0.181818	0.181818	0.363636	0.545455	1252.48	5.9527	0	4.87273	0.541414	0.35	0.372727	0.0909091	4.87273	0.0219959	0.00114932	-22.6273	0.363636	0	0.181818
TCGA-BH-A1EO	CIVRVNSGNTPLVF	Primary Tumor	TRA	14	0.285714	0.714286	0.0714286	0.0714286	0.0714286	0	0.142857	0.357143	1518.78	8.24969	0.0714286	5.3	0.588889	0.345	0.8	0.0714286	5.3	0.229255	0.00826959	-8.90714	0.428571	0.357143	0.0714286
TCGA-BH-A1EO	CAESIENTDKLIF	Primary Tumor	TRA	13	0.307692	0.461538	0.0769231	0.307692	0.0769231	0.230769	0.307692	0.538462	1482.65	4.13739	-0.153846	4.53846	0.504274	0.333846	0.0384615	0.0769231	4.53846	0.0322087	0.0373049	38.2538	0.307692	0.153846	0.307692
TCGA-BH-A1EO	CAESIENTDKLIF	Primary Tumor	TRA	13	0.307692	0.461538	0.0769231	0.307692	0.0769231	0.230769	0.307692	0.538462	1482.65	4.13739	-0.153846	4.53846	0.504274	0.333846	0.0384615	0.0769231	4.53846	0.0322087	0.0373049	38.2538	0.307692	0.153846	0.307692
TCGA-BH-A1EO	CVVSERNYGQNFVF	Primary Tumor	TRA	14	0.214286	0.571429	0.214286	0.142857	0.0714286	0.0714286	0.142857	0.357143	1661.83	5.9942	0	4.47857	0.497619	0.303571	-0.0214286	0.214286	4.47857	0.849877	0.00554321	9.67143	0.428571	0.285714	0.0714286
TCGA-BH-A1EO	CVVSERNYGQNFVF	Primary Tumor	TRA	14	0.214286	0.571429	0.214286	0.142857	0.0714286	0.0714286	0.142857	0.357143	1661.83	5.9942	0	4.47857	0.497619	0.303571	-0.0214286	0.214286	4.47857	0.849877	0.00554321	9.67143	0.428571	0.285714	0.0714286
TCGA-B6-A0RP	CRTNTGNQFYF	Primary Tumor	TRA	11	0.363636	0.545455	0.272727	0.0909091	0.0909091	0	0.0909091	0.454545	1350.46	8.22198	0.0909091	3.59091	0.39899	0.278182	-0.909091	0.272727	3.59091	0.943379	0.00836307	-11.7991	0.272727	0.272727	0
TCGA-B6-A0RP	CAVKSGSGTYKYIF	Primary Tumor	TRA	14	0.5	0.571429	0.214286	0.142857	0.142857	0	0.142857	0.571429	1523.75	9.11285	0.142857	4.66429	0.518254	0.303571	0.164286	0.214286	4.66429	0.229255	0.00473268	1.16429	0.357143	0.285714	0.0714286
TCGA-B6-A0RP	CATDAGNTGKLIF	Primary Tumor	TRA	13	0.538462	0.692308	0.0769231	0.153846	0.0769231	0.0769231	0.153846	0.615385	1310.48	5.82867	0	4.81538	0.535043	0.293846	0.315385	0.0769231	4.81538	0.0968171	0.0316667	-23.4231	0.230769	0.230769	0.230769
TCGA-A2-A0YH	CAVGAREYGNKLVF	Primary Tumor	TRA	14	0.357143	0.571429	0.142857	0.214286	0.142857	0.0714286	0.214286	0.5	1526.76	8.19757	0.0714286	4.75714	0.528571	0.308571	0.257143	0.142857	4.75714	0.19714	0.00999351	-4.12143	0.357143	0.214286	0.285714
TCGA-A2-A0YH	CAVGAREYGNKLVF	Primary Tumor	TRA	14	0.357143	0.571429	0.142857	0.214286	0.142857	0.0714286	0.214286	0.5	1526.76	8.19757	0.0714286	4.75714	0.528571	0.308571	0.257143	0.142857	4.75714	0.19714	0.00999351	-4.12143	0.357143	0.214286	0.285714
TCGA-A2-A0YH	CAVGAREYGNKLVF	Primary Tumor	TRA	14	0.357143	0.571429	0.142857	0.214286	0.142857	0.0714286	0.214286	0.5	1526.76	8.19757	0.0714286	4.75714	0.528571	0.308571	0.257143	0.142857	4.75714	0.19714	0.00999351	-4.12143	0.357143	0.214286	0.285714
TCGA-A2-A0YH	CRESITGGYNKLIF	Primary Tumor	TRA	14	0.357143	0.428571	0.142857	0.214286	0.142857	0.0714286	0.214286	0.5	1600.84	8.19757	0.0714286	4.43571	0.492857	0.295714	-0.0642857	0.142857	4.43571	0.415112	0.0136974	30.5786	0.357143	0.285714	0.142857
TCGA-A2-A0YH	CTSVQQVTNNTDKLIF	Primary Tumor	TRA	16	0.3125	0.625	0.0625	0.125	0.0625	0.0625	0.125	0.5	1811.02	5.82867	0	4.35625	0.484028	0.343125	-0.14375	0.0625	4.35625	1	0.00292929	6.45625	0.3125	0.1875	0.0625
TCGA-A2-A0YH	CAAISNTGKLIF	Primary Tumor	TRA	12	0.5	0.583333	0.0833333	0.0833333	0.0833333	0	0.0833333	0.5	1237.47	8.22223	0.0833333	5.53333	0.614815	0.308333	1.03333	0.0833333	5.53333	0.965909	0.00861111	-19.1333	0.333333	0.25	0.25
TCGA-A2-A0YH	CAASKGTGGFKTIF	Primary Tumor	TRA	14	0.642857	0.642857	0.142857	0.142857	0.142857	0	0.142857	0.714286	1387.6	9.31415	0.142857	4.85714	0.539683	0.293571	0.357143	0.142857	4.85714	0.115471	0.00277324	-10.8286	0.214286	0.285714	0.142857
TCGA-A2-A0YH	CAASKGTGGFKTIF	Primary Tumor	TRA	14	0.642857	0.642857	0.142857	0.142857	0.142857	0	0.142857	0.714286	1387.6	9.31415	0.142857	4.85714	0.539683	0.293571	0.357143	0.142857	4.85714	0.115471	0.00277324	-10.8286	0.214286	0.285714	0.142857
TCGA-B6-A0WZ	CVVRDNDMRF	Primary Tumor	TRA	10	0.1	0.6	0.1	0.4	0.2	0.2	0.4	0.4	1254.44	5.95404	0	4.11	0.456667	0.319	-0.39	0.1	4.11	0.00531952	0.00203704	-6.08	0.3	0.1	0.1
TCGA-B6-A0WZ	CQRMYYCDNNNDMRF	Primary Tumor	TRA	15	0.133333	0.466667	0.2	0.266667	0.133333	0.133333	0.266667	0.333333	1973.2	5.94586	0	3.1	0.344444	0.306	-1.4	0.2	3.1	0.0703119	0.0398737	36.1333	0.2	0.2	0.133333
TCGA-B6-A0WZ	CSSGTYKYIF	Primary Tumor	TRA	10	0.5	0.5	0.3	0.1	0.1	0	0.1	0.5	1168.32	8.17523	0.1	4.56	0.506667	0.28	0.06	0.3	4.56	0.653974	0.00777778	19.77	0.4	0.3	0
TCGA-B6-A0I2	CYNFNKFYF	Primary Tumor	TRA	9	0.111111	0.333333	0.555556	0.111111	0.111111	0	0.111111	0.111111	1245.4	8.17523	0.111111	4.21111	0.467901	0.262222	-0.288889	0.555556	4.21111	0.403179	0.00593827	54.7233	0.555556	0.222222	0
TCGA-B6-A0I2	CRLSYLPLCQGGSQGNLIF	Primary Tumor	TRA	19	0.368421	0.473684	0.105263	0.0526316	0.0526316	0	0.105263	0.473684	2069.41	8.05829	0.0526316	4.85789	0.539766	0.307895	0.357895	0.105263	4.85789	0.583802	0.00476424	27.8053	0.368421	0.368421	0.210526
TCGA-B6-A0I2	CALTYSSASKIIF	Primary Tumor	TRA	13	0.538462	0.538462	0.153846	0.0769231	0.0769231	0	0.0769231	0.538462	1403.64	8.19745	0.0769231	5.53077	0.61453	0.31	1.03077	0.153846	5.53077	0.976728	0.00850263	17.5154	0.384615	0.230769	0.230769
TCGA-B6-A0I2	CVVNGGGGNKLTF	Primary Tumor	TRA	13	0.461538	0.769231	0.0769231	0.0769231	0.0769231	0	0.0769231	0.461538	1265.44	8.22223	0.0769231	4.83077	0.536752	0.26	0.330769	0.0769231	4.83077	0.976728	0.00850263	34.9923	0.307692	0.461538	0.0769231
TCGA-B6-A0I2	CAEKPPRETSYDKVIF	Primary Tumor	TRA	16	0.25	0.5	0.125	0.375	0.1875	0.1875	0.5	0.6875	1883.13	6.1734	0	3.6875	0.409722	0.43875	-0.8125	0.125	3.6875	0.252934	0.0075982	16.175	0.25	0.1875	0.1875
TCGA-B6-A0I2	CAVSGRTGRRALTF	Primary Tumor	TRA	14	0.571429	0.642857	0.0714286	0.214286	0.214286	0	0.214286	0.714286	1494.72	11.7003	0.214286	4.52857	0.503175	0.290714	0.0285714	0.0714286	4.52857	0.207356	0.0292711	52.95	0.214286	0.214286	0.214286
TCGA-B6-A0I2	CAVSAGSNYQLIW	Primary Tumor	TRA	13	0.461538	0.615385	0.153846	0	0	0	0	0.461538	1411.58	5.5174	0	5.06923	0.563248	0.301538	0.569231	0.153846	5.06923	-1	0	9.23077	0.384615	0.307692	0.230769
TCGA-B6-A0I2	CAVSAGSNYQLIW	Primary Tumor	TRA	13	0.461538	0.615385	0.153846	0	0	0	0	0.461538	1411.58	5.5174	0	5.06923	0.563248	0.301538	0.569231	0.153846	5.06923	-1	0	9.23077	0.384615	0.307692	0.230769
TCGA-B6-A0I2	CSVYGNNRLAF	Primary Tumor	TRA	11	0.363636	0.636364	0.181818	0.0909091	0.0909091	0	0.0909091	0.363636	1243.39	8.22198	0.0909091	4.6	0.511111	0.269091	0.1	0.181818	4.6	0.830136	0.00846167	-13.2	0.363636	0.363636	0.181818
TCGA-B6-A0I2	CALSDRGGATNKLIF	Primary Tumor	TRA	15	0.466667	0.6	0.0666667	0.2	0.133333	0.0666667	0.2	0.6	1565.79	8.22211	0.0666667	4.72	0.524444	0.290667	0.22	0.0666667	4.72	0.17495	0.0140713	1.32	0.266667	0.266667	0.266667
TCGA-B6-A0I2	CAMRGLSGTYKYIF	Primary Tumor	TRA	14	0.428571	0.428571	0.214286	0.142857	0.142857	0	0.142857	0.5	1609.91	9.19598	0.142857	4.78571	0.531746	0.288571	0.285714	0.214286	4.78571	0.229255	0.00473268	-8.22857	0.357143	0.214286	0.214286
TCGA-B6-A0I2	CAMSLPTSGTYKYIF	Primary Tumor	TRA	15	0.466667	0.533333	0.2	0.0666667	0.0666667	0	0.133333	0.533333	1681.97	8.17523	0.0666667	4.88667	0.542963	0.339333	0.386667	0.2	4.88667	0.188148	0.0079798	45.8067	0.333333	0.266667	0.2
TCGA-B6-A0I2	CALYSGGGADGLTF	Primary Tumor	TRA	14	0.642857	0.714286	0.142857	0.0714286	0	0.0714286	0.0714286	0.642857	1331.45	3.79987	-0.0714286	5.11429	0.568254	0.233571	0.614286	0.142857	5.11429	0.991678	0.00906148	23.6	0.285714	0.357143	0.285714
TCGA-B6-A0I2	CAYRTNYGGATNKLIF	Primary Tumor	TRA	16	0.4375	0.5625	0.1875	0.125	0.125	0	0.125	0.5	1792.02	9.19598	0.125	4.3125	0.479167	0.291875	-0.1875	0.1875	4.3125	0.39778	0.00724116	-13.3875	0.3125	0.25	0.1875
TCGA-B6-A0I2	CAAIGVQGAQKLVF	Primary Tumor	TRA	14	0.428571	0.571429	0.0714286	0.0714286	0.0714286	0	0.0714286	0.571429	1404.68	8.22223	0.0714286	5.62143	0.624603	0.344286	1.12143	0.0714286	5.62143	0.945517	0.00826959	-2.84286	0.357143	0.142857	0.285714
TCGA-B6-A0I2	CALRRGGADGLTF	Primary Tumor	TRA	13	0.538462	0.615385	0.0769231	0.230769	0.153846	0.0769231	0.230769	0.692308	1336.52	8.24957	0.0769231	4.66154	0.517949	0.262308	0.161538	0.0769231	4.66154	0.105887	0.0595131	67.5	0.230769	0.230769	0.307692
TCGA-B6-A0I2	CAVRPGNNDMRF	Primary Tumor	TRA	12	0.25	0.666667	0.0833333	0.25	0.166667	0.0833333	0.333333	0.5	1379.57	8.24957	0.0833333	3.80833	0.423148	0.355833	-0.691667	0.0833333	3.80833	0.0181383	0.0168959	11.8583	0.166667	0.333333	0.166667
TCGA-B6-A0I2	CAMREMNYGGSQGNLIF	Primary Tumor	TRA	17	0.352941	0.470588	0.117647	0.117647	0.0588235	0.0588235	0.117647	0.470588	1891.16	5.9942	0	4.34706	0.483007	0.287647	-0.152941	0.117647	4.34706	1	0.00269587	13.5765	0.235294	0.352941	0.294118
TCGA-B6-A0I2	CAMREMNYGGSQGNLIF	Primary Tumor	TRA	17	0.352941	0.470588	0.117647	0.117647	0.0588235	0.0588235	0.117647	0.470588	1891.16	5.9942	0	4.34706	0.483007	0.287647	-0.152941	0.117647	4.34706	1	0.00269587	13.5765	0.235294	0.352941	0.294118
TCGA-B6-A0I2	CQGGSQGNLIF	Primary Tumor	TRA	11	0.454545	0.545455	0.0909091	0	0	0	0	0.545455	1123.24	5.51813	0	4.6	0.511111	0.273636	0.1	0.0909091	4.6	-1	0	23.2455	0.272727	0.454545	0.0909091
TCGA-B6-A0I2	CATDASNTGKLIF	Primary Tumor	TRA	13	0.538462	0.692308	0.0769231	0.153846	0.0769231	0.0769231	0.153846	0.615385	1340.5	5.82867	0	4.78462	0.531624	0.302308	0.284615	0.0769231	4.78462	0.0968171	0.0316667	-16.8923	0.230769	0.230769	0.230769
TCGA-B6-A0I2	CAVRDLYNTDKLIF	Primary Tumor	TRA	14	0.214286	0.5	0.142857	0.285714	0.142857	0.142857	0.285714	0.428571	1670.93	5.9527	0	4.67857	0.519841	0.316429	0.178571	0.142857	4.67857	0.0353111	0.0101728	-8.90714	0.428571	0.0714286	0.214286
TCGA-B6-A0I2	CADEGRDDKIIF	Primary Tumor	TRA	12	0.25	0.5	0.0833333	0.5	0.166667	0.333333	0.5	0.666667	1381.51	4.22601	-0.166667	3.94167	0.437963	0.33	-0.558333	0.0833333	3.94167	0.144942	0.0162434	-12.0583	0.25	0.0833333	0.166667
TCGA-E2-A14T	CALVYGNNRLAF	Primary Tumor	TRA	12	0.333333	0.583333	0.166667	0.0833333	0.0833333	0	0.0833333	0.333333	1340.55	8.22198	0.0833333	5.125	0.569444	0.2775	0.625	0.166667	5.125	0.965909	0.00861111	-11.2667	0.416667	0.25	0.333333
TCGA-E2-A14T	CAASETSYDKVIF	Primary Tumor	TRA	13	0.461538	0.615385	0.153846	0.230769	0.0769231	0.153846	0.230769	0.615385	1433.58	4.37018	-0.0769231	4.73846	0.526496	0.328462	0.238462	0.153846	4.73846	0.105887	0.0245131	29.2	0.307692	0.153846	0.230769
TCGA-E2-A14T	CALVTGGGNKLTF	Primary Tumor	TRA	13	0.538462	0.692308	0.0769231	0.0769231	0.0769231	0	0.0769231	0.538462	1280.49	8.22223	0.0769231	5.18462	0.576068	0.270769	0.684615	0.0769231	5.18462	0.976728	0.00850263	29.8	0.307692	0.307692	0.230769
TCGA-E2-A14T	CAVDIDSSYDKVIF	Primary Tumor	TRA	14	0.285714	0.642857	0.142857	0.285714	0.0714286	0.214286	0.285714	0.5	1574.75	3.92999	-0.142857	5.01429	0.557143	0.324286	0.514286	0.142857	5.01429	0.039301	0.0441836	30.85	0.428571	0.142857	0.0714286
TCGA-E2-A14T	CAVDIDSSYDKVIF	Primary Tumor	TRA	14	0.285714	0.642857	0.142857	0.285714	0.0714286	0.214286	0.285714	0.5	1574.75	3.92999	-0.142857	5.01429	0.557143	0.324286	0.514286	0.142857	5.01429	0.039301	0.0441836	30.85	0.428571	0.142857	0.0714286
TCGA-E2-A14T	CCCVLLHPERGSGAGANNLFF	Primary Tumor	TRA	21	0.428571	0.619048	0.142857	0.0952381	0.047619	0.047619	0.142857	0.47619	2208.54	6.72308	0	5	0.555556	0.290952	0.5	0.0952381	5	0.927159	0.00408905	0.709524	0.285714	0.333333	0.285714
TCGA-A7-A3RF	CDNNYGQNFVF	Primary Tumor	TRA	11	0.181818	0.636364	0.272727	0.0909091	0	0.0909091	0.0909091	0.272727	1320.39	3.79987	-0.0909091	3.87273	0.430303	0.272727	-0.627273	0.272727	3.87273	0.943379	0.00836307	5.21818	0.363636	0.363636	0
TCGA-A7-A3RF	CAVMDSNYQLIW	Primary Tumor	TRA	12	0.25	0.5	0.166667	0.0833333	0	0.0833333	0.0833333	0.333333	1442.66	3.79987	-0.0833333	4.93333	0.548148	0.32	0.433333	0.166667	4.93333	0.954546	0.00902778	25.2167	0.416667	0.166667	0.25
TCGA-A1-A0SH	CAERGGTSYGKLTF	Primary Tumor	TRA	14	0.571429	0.571429	0.142857	0.214286	0.142857	0.0714286	0.214286	0.714286	1489.65	8.19757	0.0714286	4.09286	0.454762	0.279286	-0.407143	0.142857	4.09286	0.289322	0.0136974	-3.40714	0.214286	0.285714	0.214286
TCGA-A1-A0SH	CWGGIGQAGTALIF	Primary Tumor	TRA	14	0.571429	0.571429	0.142857	0	0	0	0	0.571429	1393.61	5.51813	0	5.57143	0.619048	0.271429	1.07143	0.142857	5.57143	-1	0	15.4786	0.357143	0.285714	0.214286
TCGA-A1-A0SH	CAGSGTPGGATNKLIF	Primary Tumor	TRA	16	0.625	0.75	0.0625	0.0625	0.0625	0	0.125	0.6875	1493.68	8.22223	0.0625	4.775	0.530556	0.31375	0.275	0.0625	4.775	0.281667	0.00766888	6.575	0.1875	0.4375	0.1875
TCGA-A1-A0SH	CIVRVGNTNAGKSTF	Primary Tumor	TRA	15	0.466667	0.733333	0.0666667	0.133333	0.133333	0	0.133333	0.533333	1566.78	9.50775	0.133333	4.60667	0.511852	0.305333	0.106667	0.0666667	4.60667	0.335604	0.00626263	-20.76	0.266667	0.333333	0.0666667
TCGA-AC-A3TN	CALETGATNKLIF	Primary Tumor	TRA	13	0.461538	0.538462	0.0769231	0.153846	0.0769231	0.0769231	0.153846	0.538462	1380.61	5.99432	0	5.13846	0.57094	0.311538	0.638462	0.0769231	5.13846	0.0968171	0.0316667	-3.70769	0.307692	0.153846	0.384615
TCGA-A1-A0SM	CCESDSNYQLIW	Primary Tumor	TRA	12	0.333333	0.5	0.166667	0.166667	0	0.166667	0.166667	0.416667	1460.59	3.66595	-0.166667	4.125	0.458333	0.3025	-0.375	0.166667	4.125	0.643291	0.0254762	41.2667	0.333333	0.25	0.166667
TCGA-BH-A0C7	CASCGATNKLIF	Primary Tumor	TRA	12	0.583333	0.666667	0.0833333	0.0833333	0.0833333	0	0.0833333	0.5	1227.45	8.05841	0.0833333	5.36667	0.596296	0.296667	0.866667	0.0833333	5.36667	0.965909	0.00861111	29.3917	0.25	0.25	0.25
TCGA-BH-A0C7	CAVRDYRGGGADGLTF	Primary Tumor	TRA	16	0.5	0.6875	0.125	0.25	0.125	0.125	0.25	0.6875	1657.8	5.95343	0	4.33125	0.48125	0.265	-0.16875	0.125	4.33125	0.086	0.018771	6.025	0.25	0.25	0.1875
TCGA-BH-A0C7	CAEINSGTYKYIF	Primary Tumor	TRA	13	0.384615	0.461538	0.230769	0.153846	0.0769231	0.0769231	0.153846	0.461538	1508.69	5.99286	0	4.55385	0.505983	0.308462	0.0538462	0.230769	4.55385	0.233903	0.0277083	17.5154	0.384615	0.230769	0.153846
TCGA-BH-A0C7	CAVNGGSQGNLIF	Primary Tumor	TRA	13	0.461538	0.692308	0.0769231	0	0	0	0	0.461538	1279.42	5.51813	0	5.04615	0.560684	0.27	0.546154	0.0769231	5.04615	-1	0	15.4462	0.307692	0.461538	0.153846
TCGA-BH-A0C7	CAVLGEDTGRRALTF	Primary Tumor	TRA	15	0.466667	0.6	0.0666667	0.266667	0.133333	0.133333	0.266667	0.666667	1608.82	6.06329	0	4.66667	0.518519	0.294	0.166667	0.0666667	4.66667	0.134788	0.0827076	47.88	0.266667	0.133333	0.333333
TCGA-BH-A0C7	CALSGYSGGYNKLIF	Primary Tumor	TRA	15	0.466667	0.533333	0.2	0.0666667	0.0666667	0	0.0666667	0.466667	1592.81	8.17523	0.0666667	4.92667	0.547407	0.257333	0.426667	0.2	4.92667	0.920366	0.0079798	16.3667	0.4	0.4	0.2
TCGA-BH-A0C7	CITVLLHFNNNARLMF	Primary Tumor	TRA	16	0.1875	0.4375	0.1875	0.0625	0.0625	0	0.0625	0.25	1906.28	8.25861	0.0625	5.3125	0.590278	0.283125	0.8125	0.125	5.3125	0.90155	0.00766888	2.89375	0.4375	0.1875	0.3125
TCGA-BH-A0C7	CAGRTGANNLFF	Primary Tumor	TRA	12	0.5	0.666667	0.166667	0.0833333	0.0833333	0	0.0833333	0.5	1270.42	8.24969	0.0833333	4.70833	0.523148	0.255833	0.208333	0.166667	4.70833	0.965909	0.00861111	-4.98333	0.25	0.333333	0.25
TCGA-A8-A08X	CAVELPSGSARQLTF	Primary Tumor	TRA	15	0.466667	0.6	0.0666667	0.133333	0.0666667	0.0666667	0.2	0.666667	1578.79	5.99493	0	4.82667	0.536296	0.352667	0.326667	0.0666667	4.82667	0.10025	0.0288636	56.08	0.266667	0.266667	0.333333
TCGA-A8-A08X	CVVQTGANNLFF	Primary Tumor	TRA	12	0.333333	0.666667	0.166667	0	0	0	0	0.333333	1312.49	5.51813	0	5.375	0.597222	0.291667	0.875	0.166667	5.375	-1	0	-11.2667	0.416667	0.25	0.166667
TCGA-A8-A08X	CGELPNSGNTPLVF	Primary Tumor	TRA	14	0.357143	0.714286	0.0714286	0.0714286	0	0.0714286	0.214286	0.5	1447.61	3.99969	-0.0714286	4.57857	0.50873	0.362143	0.0785714	0.0714286	4.57857	0.145654	0.0074777	5.52857	0.285714	0.5	0.214286
TCGA-A8-A08X	CAENRDTGNQFYF	Primary Tumor	TRA	13	0.307692	0.538462	0.230769	0.230769	0.0769231	0.153846	0.230769	0.538462	1564.63	4.37018	-0.0769231	3.38462	0.376068	0.294615	-1.11538	0.230769	3.38462	0.54433	0.00367028	-1.91462	0.230769	0.230769	0.153846
TCGA-A8-A08X	CAVSSYNNNDMRF	Primary Tumor	TRA	13	0.307692	0.692308	0.153846	0.153846	0.0769231	0.0769231	0.153846	0.384615	1520.65	5.82867	0	3.86923	0.429915	0.289231	-0.630769	0.153846	3.86923	0.806499	0.00791667	18.2462	0.230769	0.384615	0.153846
TCGA-A8-A08X	CAVTGSGYALNF	Primary Tumor	TRA	12	0.583333	0.75	0.166667	0	0	0	0	0.5	1202.34	5.5174	0	5.31667	0.590741	0.260833	0.816667	0.166667	5.31667	-1	0	-4.85	0.333333	0.333333	0.25
TCGA-A8-A08X	CALPPNTGKLIF	Primary Tumor	TRA	12	0.333333	0.583333	0.0833333	0.0833333	0.0833333	0	0.25	0.5	1273.54	8.22223	0.0833333	5.125	0.569444	0.411667	0.625	0.0833333	5.125	0.0894573	0.00861111	12.9667	0.333333	0.333333	0.25
TCGA-A8-A08X	CCLLLCCGGSRKNYNQGGKLIF	Primary Tumor	TRA	22	0.409091	0.5	0.0909091	0.136364	0.136364	0	0.136364	0.409091	2390.87	8.9162	0.136364	4.77273	0.530303	0.277273	0.272727	0.0909091	4.77273	0.672989	0.0216788	27.1273	0.318182	0.318182	0.181818
TCGA-A8-A08X	CATERNNRLAF	Primary Tumor	TRA	11	0.363636	0.545455	0.0909091	0.272727	0.181818	0.0909091	0.272727	0.545455	1294.44	8.24969	0.0909091	3.81818	0.424242	0.312727	-0.681818	0.0909091	3.81818	0.0778188	0.0236288	37.8182	0.181818	0.181818	0.363636
TCGA-A8-A08X	CATERNNRLAF	Primary Tumor	TRA	11	0.363636	0.545455	0.0909091	0.272727	0.181818	0.0909091	0.272727	0.545455	1294.44	8.24969	0.0909091	3.81818	0.424242	0.312727	-0.681818	0.0909091	3.81818	0.0778188	0.0236288	37.8182	0.181818	0.181818	0.363636
TCGA-C8-A3M7	CVVSASYGQNFVF	Primary Tumor	TRA	13	0.384615	0.692308	0.230769	0	0	0	0	0.384615	1420.59	5.5174	0	5.43846	0.604274	0.291538	0.938462	0.230769	5.43846	-1	0	-14.6615	0.461538	0.307692	0.0769231
TCGA-C8-A3M7	CAVSEGAQKLVF	Primary Tumor	TRA	12	0.416667	0.583333	0.0833333	0.166667	0.0833333	0.0833333	0.166667	0.583333	1251.45	5.99432	0	5.25	0.583333	0.338333	0.75	0.0833333	5.25	0.119457	0.0274206	11.0667	0.333333	0.166667	0.333333
TCGA-C8-A3M7	CAVSEGAQKLVF	Primary Tumor	TRA	12	0.416667	0.583333	0.0833333	0.166667	0.0833333	0.0833333	0.166667	0.583333	1251.45	5.99432	0	5.25	0.583333	0.338333	0.75	0.0833333	5.25	0.119457	0.0274206	11.0667	0.333333	0.166667	0.333333
TCGA-C8-A3M7	CRHLLLCWAAYHNNARLMF	Primary Tumor	TRA	19	0.263158	0.368421	0.263158	0.105263	0.105263	0	0.105263	0.368421	2332.77	8.95734	0.105263	4.8	0.533333	0.278947	0.3	0.157895	4.8	0.573427	0.00909286	43.1211	0.368421	0.105263	0.421053
TCGA-C8-A3M7	CRHLLLCWAAYHNNARLMF	Primary Tumor	TRA	19	0.263158	0.368421	0.263158	0.105263	0.105263	0	0.105263	0.368421	2332.77	8.95734	0.105263	4.8	0.533333	0.278947	0.3	0.157895	4.8	0.573427	0.00909286	43.1211	0.368421	0.105263	0.421053
TCGA-C8-A3M7	CARPPGNTPLVF	Primary Tumor	TRA	12	0.333333	0.75	0.0833333	0.0833333	0.0833333	0	0.333333	0.583333	1271.49	8.24969	0.0833333	4.6	0.511111	0.46	0.1	0.0833333	4.6	0.0848758	0.00819444	27.1167	0.25	0.416667	0.166667
TCGA-C8-A3M7	CAAGDNQGGKLIF	Primary Tumor	TRA	13	0.461538	0.615385	0.0769231	0.153846	0.0769231	0.0769231	0.153846	0.615385	1293.45	5.82867	0	4.62308	0.513675	0.295385	0.123077	0.0769231	4.62308	0.0709504	0.0321528	-0.138462	0.230769	0.307692	0.230769
TCGA-A8-A06R	CISVLIGAPLIQGAQKLVF	Primary Tumor	TRA	19	0.315789	0.473684	0.0526316	0.0526316	0.0526316	0	0.105263	0.473684	1970.42	8.22223	0.0526316	5.97895	0.664327	0.365789	1.47895	0.0526316	5.97895	0.446594	0.00675839	6.20526	0.473684	0.210526	0.263158
TCGA-AC-A3W5	CAFMKWGGGADGLTF	Primary Tumor	TRA	15	0.533333	0.6	0.2	0.133333	0.0666667	0.0666667	0.133333	0.6	1560.79	5.82867	0	4.95333	0.55037	0.258667	0.453333	0.2	4.95333	0.145735	0.0320707	15.78	0.266667	0.266667	0.266667
TCGA-A2-A1FX	CAETGGATNKLIF	Primary Tumor	TRA	13	0.538462	0.615385	0.0769231	0.153846	0.0769231	0.0769231	0.153846	0.615385	1324.5	5.99432	0	4.81538	0.535043	0.303077	0.315385	0.0769231	4.81538	0.233903	0.0277083	5.78462	0.230769	0.230769	0.307692
TCGA-A2-A1FX	CAETGGATNKLIF	Primary Tumor	TRA	13	0.538462	0.615385	0.0769231	0.153846	0.0769231	0.0769231	0.153846	0.615385	1324.5	5.99432	0	4.81538	0.535043	0.303077	0.315385	0.0769231	4.81538	0.233903	0.0277083	5.78462	0.230769	0.230769	0.307692
TCGA-A2-A1FX	CAETGGATNKLIF	Primary Tumor	TRA	13	0.538462	0.615385	0.0769231	0.153846	0.0769231	0.0769231	0.153846	0.615385	1324.5	5.99432	0	4.81538	0.535043	0.303077	0.315385	0.0769231	4.81538	0.233903	0.0277083	5.78462	0.230769	0.230769	0.307692
TCGA-A2-A1FX	CAETGGATKKLIF	Primary Tumor	TRA	13	0.538462	0.538462	0.0769231	0.230769	0.153846	0.0769231	0.230769	0.692308	1338.57	8.19781	0.0769231	4.78462	0.531624	0.325385	0.284615	0.0769231	4.78462	0.166715	0.0665763	-0.869231	0.230769	0.153846	0.307692
TCGA-A2-A1FX	CAETGGATNKLIF	Primary Tumor	TRA	13	0.538462	0.615385	0.0769231	0.153846	0.0769231	0.0769231	0.153846	0.615385	1324.5	5.99432	0	4.81538	0.535043	0.303077	0.315385	0.0769231	4.81538	0.233903	0.0277083	5.78462	0.230769	0.230769	0.307692
TCGA-A2-A1FX	CAETGGATNKLIF	Primary Tumor	TRA	13	0.538462	0.615385	0.0769231	0.153846	0.0769231	0.0769231	0.153846	0.615385	1324.5	5.99432	0	4.81538	0.535043	0.303077	0.315385	0.0769231	4.81538	0.233903	0.0277083	5.78462	0.230769	0.230769	0.307692
TCGA-A2-A1FX	CAETGGATNKLIF	Primary Tumor	TRA	13	0.538462	0.615385	0.0769231	0.153846	0.0769231	0.0769231	0.153846	0.615385	1324.5	5.99432	0	4.81538	0.535043	0.303077	0.315385	0.0769231	4.81538	0.233903	0.0277083	5.78462	0.230769	0.230769	0.307692
TCGA-A2-A1FX	CAETGGATNKLIF	Primary Tumor	TRA	13	0.538462	0.615385	0.0769231	0.153846	0.0769231	0.0769231	0.153846	0.615385	1324.5	5.99432	0	4.81538	0.535043	0.303077	0.315385	0.0769231	4.81538	0.233903	0.0277083	5.78462	0.230769	0.230769	0.307692
TCGA-E2-A1B6	CAVNAMNRDDKIIF	Primary Tumor	TRA	14	0.214286	0.571429	0.0714286	0.285714	0.142857	0.142857	0.285714	0.428571	1609.87	5.95343	0	4.61429	0.512698	0.340714	0.114286	0.0714286	4.61429	0.48303	0.00433059	-2.84286	0.285714	0.142857	0.214286
TCGA-E2-A1B6	CAVNAMNRDDKIIF	Primary Tumor	TRA	14	0.214286	0.571429	0.0714286	0.285714	0.142857	0.142857	0.285714	0.428571	1609.87	5.95343	0	4.61429	0.512698	0.340714	0.114286	0.0714286	4.61429	0.48303	0.00433059	-2.84286	0.285714	0.142857	0.214286
TCGA-E2-A1B6	CAVATGSGGSYIPTF	Primary Tumor	TRA	15	0.666667	0.8	0.133333	0	0	0	0.0666667	0.666667	1430.58	5.5174	0	5.2	0.577778	0.313333	0.7	0.133333	5.2	0.858126	0	18.2067	0.266667	0.4	0.133333
TCGA-E2-A1B6	CLLLCVYGNNRLAF	Primary Tumor	TRA	14	0.285714	0.5	0.142857	0.0714286	0.0714286	0	0.0714286	0.214286	1598.93	8.05829	0.0714286	5.62857	0.625397	0.263571	1.12857	0.142857	5.62857	0.945517	0.00826959	0.142857	0.5	0.214286	0.357143
TCGA-E2-A1B6	CAMPTPYGQNFVF	Primary Tumor	TRA	13	0.307692	0.615385	0.230769	0	0	0	0.153846	0.461538	1474.7	5.5174	0	4.76154	0.52906	0.400769	0.261538	0.230769	4.76154	0.649958	0	24.9385	0.307692	0.307692	0.153846
TCGA-E2-A1B6	CALRGYGQNFVF	Primary Tumor	TRA	12	0.333333	0.5	0.25	0.0833333	0.0833333	0	0.0833333	0.416667	1374.57	8.22198	0.0833333	4.85833	0.539815	0.273333	0.358333	0.25	4.85833	0.965909	0.00861111	-8.53333	0.416667	0.25	0.166667
TCGA-E2-A1B6	CAVDSGTYKYIF	Primary Tumor	TRA	12	0.416667	0.583333	0.25	0.166667	0.0833333	0.0833333	0.166667	0.5	1366.54	5.82733	0	4.825	0.536111	0.301667	0.325	0.25	4.825	0.0470281	0.0319048	5.61667	0.416667	0.166667	0.0833333
TCGA-E2-A1B6	CAGRSGNTHLVF	Primary Tumor	TRA	12	0.5	0.666667	0.166667	0.0833333	0.0833333	0	0.0833333	0.583333	1261.41	8.25861	0.0833333	4.63333	0.514815	0.2575	0.133333	0.0833333	4.63333	0.965909	0.00861111	31.6333	0.25	0.333333	0.166667
TCGA-E2-A1B6	CCCVLLHPERRLTNAGKSTF	Primary Tumor	TRA	20	0.4	0.55	0.1	0.2	0.15	0.05	0.25	0.55	2248.65	8.70624	0.1	4.52	0.502222	0.331	0.02	0.05	4.52	0.321924	0.0142773	36.03	0.25	0.2	0.25
TCGA-E2-A1B6	CAVRSGNTGNQFYF	Primary Tumor	TRA	14	0.428571	0.642857	0.214286	0.0714286	0.0714286	0	0.0714286	0.5	1563.69	8.22198	0.0714286	4.17857	0.464286	0.276429	-0.321429	0.214286	4.17857	0.945517	0.00826959	28.9293	0.285714	0.357143	0.0714286
TCGA-E2-A1B6	CTIASSVIRCPQGGSEKLVF	Primary Tumor	TRA	20	0.45	0.6	0.05	0.15	0.1	0.05	0.2	0.6	2095.44	8.05853	0.05	4.995	0.555	0.3515	0.495	0.05	4.995	0.419779	0.011713	66.245	0.3	0.3	0.15
TCGA-E2-A1B6	CTIASSVIRCPQGGSEKLVF	Primary Tumor	TRA	20	0.45	0.6	0.05	0.15	0.1	0.05	0.2	0.6	2095.44	8.05853	0.05	4.995	0.555	0.3515	0.495	0.05	4.995	0.419779	0.011713	66.245	0.3	0.3	0.15
TCGA-E2-A1B6	CSKGSGGSNYKLTF	Primary Tumor	TRA	14	0.571429	0.642857	0.142857	0.142857	0.142857	0	0.142857	0.642857	1448.6	9.1972	0.142857	3.94286	0.438095	0.266429	-0.557143	0.142857	3.94286	0.343039	0.00669211	14.7857	0.214286	0.5	0.0714286
TCGA-E2-A1B6	CAAMETSYDKVIF	Primary Tumor	TRA	13	0.384615	0.538462	0.153846	0.230769	0.0769231	0.153846	0.230769	0.538462	1477.7	4.37018	-0.0769231	4.94615	0.549573	0.337692	0.446154	0.153846	4.94615	0.105887	0.0245131	14.3846	0.307692	0.0769231	0.307692
TCGA-E2-A1B6	CDVFLCFHEATSNFGNEKLTF	Primary Tumor	TRA	21	0.333333	0.52381	0.238095	0.190476	0.047619	0.142857	0.190476	0.47619	2422.69	4.65106	-0.0952381	4.62381	0.513757	0.279524	0.12381	0.190476	4.62381	0.380753	0.0105458	9.32857	0.333333	0.190476	0.238095
TCGA-E2-A1B6	CAFMRTINFGNEKLTF	Primary Tumor	TRA	16	0.3125	0.4375	0.1875	0.1875	0.125	0.0625	0.1875	0.4375	1892.2	8.22223	0.0625	4.6375	0.515278	0.299375	0.1375	0.1875	4.6375	0.283018	0.0140325	-7.63125	0.3125	0.1875	0.25
TCGA-E2-A1B6	CGESSNFGNEKLTF	Primary Tumor	TRA	14	0.428571	0.571429	0.142857	0.214286	0.0714286	0.142857	0.214286	0.571429	1532.63	4.53131	-0.0714286	3.85	0.427778	0.273571	-0.65	0.142857	3.85	0.307201	0.0110713	17.3643	0.214286	0.428571	0.214286
TCGA-E2-A1B6	CIAPFHFGNEKLTF	Primary Tumor	TRA	14	0.285714	0.428571	0.285714	0.142857	0.0714286	0.0714286	0.214286	0.5	1623.87	6.73956	0	4.8	0.533333	0.332857	0.3	0.214286	4.8	0.163533	0.00354321	26.0786	0.357143	0.214286	0.214286
TCGA-E2-A1B6	CTTVLPGGSQGNLIF	Primary Tumor	TRA	15	0.466667	0.666667	0.0666667	0	0	0	0.0666667	0.533333	1506.72	5.51813	0	5.14	0.571111	0.316667	0.64	0.0666667	5.14	1	0	59.3133	0.333333	0.4	0.133333
TCGA-E2-A1B6	CALMRSSGTYKYIF	Primary Tumor	TRA	14	0.428571	0.428571	0.214286	0.142857	0.142857	0	0.142857	0.5	1639.94	9.19598	0.142857	4.75714	0.528571	0.296429	0.257143	0.214286	4.75714	0.115471	0.00277324	42.9786	0.357143	0.214286	0.214286
TCGA-E2-A1B6	CATHDGTGTYKYIF	Primary Tumor	TRA	14	0.5	0.571429	0.285714	0.142857	0.0714286	0.0714286	0.142857	0.642857	1576.73	6.7326	0	4.17857	0.464286	0.282857	-0.321429	0.214286	4.17857	0.115471	0.0318889	-8.90714	0.285714	0.142857	0.0714286
TCGA-E2-A1B6	CWAAPGTYKYIF	Primary Tumor	TRA	12	0.416667	0.5	0.333333	0.0833333	0.0833333	0	0.166667	0.5	1419.64	8.17523	0.0833333	4.775	0.530556	0.359167	0.275	0.333333	4.775	0.119457	0.00861111	25.35	0.416667	0.166667	0.166667
TCGA-E2-A1B6	CWAAPGTYKYIF	Primary Tumor	TRA	12	0.416667	0.5	0.333333	0.0833333	0.0833333	0	0.166667	0.5	1419.64	8.17523	0.0833333	4.775	0.530556	0.359167	0.275	0.333333	4.775	0.119457	0.00861111	25.35	0.416667	0.166667	0.166667
TCGA-E2-A1B6	CSVLLCSKREGTGANNLFF	Primary Tumor	TRA	19	0.421053	0.578947	0.105263	0.157895	0.105263	0.0526316	0.157895	0.473684	2059.37	8.05853	0.0526316	4.81579	0.535088	0.277895	0.315789	0.105263	4.81579	0.833708	0.012862	13.2263	0.315789	0.315789	0.263158
TCGA-E2-A1B6	CSRDGRNNNARLMF	Primary Tumor	TRA	14	0.285714	0.571429	0.0714286	0.285714	0.214286	0.0714286	0.285714	0.5	1653.84	10.2609	0.142857	3.36429	0.37381	0.286429	-1.13571	0.0714286	3.36429	0.0877189	0.0116235	31.8571	0.142857	0.357143	0.214286
TCGA-E2-A1B6	CAGRSGNTPLVF	Primary Tumor	TRA	12	0.5	0.75	0.0833333	0.0833333	0.0833333	0	0.166667	0.583333	1221.39	8.24969	0.0833333	4.76667	0.52963	0.324167	0.266667	0.0833333	4.76667	0.0470281	0.00861111	31.6333	0.25	0.416667	0.166667
TCGA-E2-A1B6	CAPYSGAGSYQLTF	Primary Tumor	TRA	14	0.571429	0.642857	0.214286	0	0	0	0.0714286	0.642857	1464.6	5.51678	0	4.63571	0.515079	0.320714	0.135714	0.214286	4.63571	0.899356	0	25.7929	0.285714	0.357143	0.214286
TCGA-E2-A1B6	CARCYNTNAGKSTF	Primary Tumor	TRA	14	0.571429	0.714286	0.142857	0.142857	0.142857	0	0.142857	0.571429	1535.7	8.90326	0.142857	3.93571	0.437302	0.296429	-0.564286	0.142857	3.93571	0.343039	0.00669211	-4.76429	0.142857	0.285714	0.142857
TCGA-E2-A1B6	CAGNSGSARQLTF	Primary Tumor	TRA	13	0.615385	0.692308	0.0769231	0.0769231	0.0769231	0	0.0769231	0.692308	1311.42	8.24969	0.0769231	4.35385	0.483761	0.28	-0.146154	0.0769231	4.35385	1	0.009149	27.0077	0.153846	0.384615	0.230769
TCGA-E2-A1B6	CYGPNPSYKLIF	Primary Tumor	TRA	12	0.25	0.5	0.25	0.0833333	0.0833333	0	0.25	0.416667	1401.63	8.17523	0.0833333	4.43333	0.492593	0.395833	-0.0666667	0.25	4.43333	0.0856921	0.00861111	8.66667	0.416667	0.416667	0.0833333
TCGA-E2-A1B6	CAVRDTGGFKTIF	Primary Tumor	TRA	13	0.461538	0.615385	0.153846	0.230769	0.153846	0.0769231	0.230769	0.615385	1414.63	8.22211	0.0769231	4.84615	0.538462	0.298462	0.346154	0.153846	4.84615	0.0869945	0.0125253	-10.9308	0.307692	0.153846	0.0769231
TCGA-E2-A1B6	CLLLCVYGNNRLAF	Primary Tumor	TRA	14	0.285714	0.5	0.142857	0.0714286	0.0714286	0	0.0714286	0.214286	1598.93	8.05829	0.0714286	5.62857	0.625397	0.263571	1.12857	0.142857	5.62857	0.945517	0.00826959	0.142857	0.5	0.214286	0.357143
TCGA-E2-A1B6	CVVNTGRRALTF	Primary Tumor	TRA	12	0.416667	0.666667	0.0833333	0.166667	0.166667	0	0.166667	0.5	1336.56	10.3519	0.166667	4.91667	0.546296	0.300833	0.416667	0.0833333	4.91667	0.580981	0.029127	46.75	0.333333	0.166667	0.166667
TCGA-E2-A14P	CLLPLCCERGGRGSTLGRLYF	Primary Tumor	TRA	21	0.428571	0.47619	0.0952381	0.190476	0.142857	0.047619	0.238095	0.52381	2314.75	8.7049	0.0952381	4.8	0.533333	0.28619	0.3	0.0952381	4.8	0.11705	0.0160455	25.6571	0.333333	0.285714	0.285714
TCGA-E2-A14P	CLLPLCCERGGRGSTLGRLYF	Primary Tumor	TRA	21	0.428571	0.47619	0.0952381	0.190476	0.142857	0.047619	0.238095	0.52381	2314.75	8.7049	0.0952381	4.8	0.533333	0.28619	0.3	0.0952381	4.8	0.11705	0.0160455	25.6571	0.333333	0.285714	0.285714
TCGA-E2-A14P	CIVRVDAGGTSYGKVTF	Primary Tumor	TRA	17	0.470588	0.705882	0.117647	0.176471	0.117647	0.0588235	0.176471	0.588235	1773.02	8.19733	0.0588235	4.94706	0.549673	0.300588	0.447059	0.117647	4.94706	0.360256	0.0143525	-14.8765	0.352941	0.235294	0.0588235
TCGA-E2-A14P	CIVRVDAGGTSYGKLTF	Primary Tumor	TRA	17	0.470588	0.647059	0.117647	0.176471	0.117647	0.0588235	0.176471	0.588235	1787.04	8.19733	0.0588235	4.92353	0.547059	0.291765	0.423529	0.117647	4.92353	0.360256	0.0143525	-9.88235	0.352941	0.235294	0.117647
TCGA-E2-A14P	CALWGNNNDMRF	Primary Tumor	TRA	12	0.25	0.583333	0.166667	0.166667	0.0833333	0.0833333	0.166667	0.333333	1440.61	5.82941	0	3.91667	0.435185	0.271667	-0.583333	0.166667	3.91667	0.738051	0.00896825	6.9	0.25	0.333333	0.25
TCGA-E2-A14P	CAFYGGSQGNLIF	Primary Tumor	TRA	13	0.461538	0.538462	0.230769	0	0	0	0	0.461538	1376.54	5.5174	0	5.10769	0.567521	0.251538	0.607692	0.230769	5.10769	-1	0	45.5546	0.384615	0.384615	0.153846
TCGA-E2-A14P	CALSPRGNNARLMF	Primary Tumor	TRA	14	0.357143	0.571429	0.0714286	0.142857	0.142857	0	0.214286	0.5	1549.82	10.3519	0.142857	4.47143	0.496825	0.333571	-0.0285714	0.0714286	4.47143	0.10548	0.00475737	23.1571	0.214286	0.357143	0.357143
TCGA-E2-A14P	CILRDYGQNFVF	Primary Tumor	TRA	12	0.166667	0.416667	0.25	0.166667	0.0833333	0.0833333	0.166667	0.333333	1474.68	5.82867	0	4.825	0.536111	0.289167	0.325	0.25	4.825	0.71572	0.00448413	21.6667	0.5	0.166667	0.0833333
TCGA-E2-A14P	CAVGENQGGKLIF	Primary Tumor	TRA	13	0.384615	0.538462	0.0769231	0.153846	0.0769231	0.0769231	0.153846	0.538462	1335.53	5.99432	0	4.80769	0.534188	0.306154	0.307692	0.0769231	4.80769	0.0709504	0.0321528	-12.4692	0.307692	0.307692	0.230769
TCGA-E2-A14P	CAVGPPSGSARQLTF	Primary Tumor	TRA	15	0.533333	0.733333	0.0666667	0.0666667	0.0666667	0	0.2	0.733333	1490.68	8.24969	0.0666667	4.67333	0.519259	0.384	0.173333	0.0666667	4.67333	0.123987	0.00886364	50.42	0.2	0.4	0.2
TCGA-E2-A14P	CAENMGGGGNKLTF	Primary Tumor	TRA	14	0.5	0.642857	0.0714286	0.142857	0.0714286	0.0714286	0.142857	0.571429	1398.56	5.99432	0	4.22143	0.469048	0.267857	-0.278571	0.0714286	4.22143	0.343039	0.0248025	49.3286	0.142857	0.428571	0.285714
TCGA-EW-A3E8	CALSSYSNDYKLSF	Primary Tumor	TRA	14	0.428571	0.571429	0.214286	0.142857	0.0714286	0.0714286	0.142857	0.5	1597.74	5.82733	0	4.35714	0.484127	0.275714	-0.142857	0.214286	4.35714	0.761836	0.00908642	16.9786	0.357143	0.357143	0.214286
TCGA-BH-A0BL	CAVNAPNARLMF	Primary Tumor	TRA	12	0.333333	0.666667	0.0833333	0.0833333	0.0833333	0	0.166667	0.416667	1306.56	8.24969	0.0833333	5.125	0.569444	0.37	0.625	0.0833333	5.125	0.268935	0.00861111	25.2167	0.25	0.25	0.416667
TCGA-BH-A0BL	CAAHNNNDMRF	Primary Tumor	TRA	11	0.272727	0.636364	0.181818	0.181818	0.0909091	0.0909091	0.181818	0.454545	1292.4	6.73529	0	3.50909	0.389899	0.291818	-0.990909	0.0909091	3.50909	0.645799	0.0103439	16.0455	0.0909091	0.272727	0.272727
TCGA-BH-A0BL	CAVNVGGSYIPTF	Primary Tumor	TRA	13	0.461538	0.769231	0.153846	0	0	0	0.0769231	0.461538	1327.5	5.5174	0	5.36923	0.596581	0.330769	0.869231	0.153846	5.36923	0.953456	0	19.4692	0.384615	0.384615	0.0769231
TCGA-BH-A0BL	CAVLQGGGTSYGKLTF	Primary Tumor	TRA	16	0.5625	0.625	0.125	0.0625	0.0625	0	0.0625	0.625	1601.82	8.19745	0.0625	4.9	0.544444	0.275	0.4	0.125	4.9	0.90155	0.00766888	31.6625	0.3125	0.3125	0.1875
TCGA-BH-A0BL	CALTGGGNKLTF	Primary Tumor	TRA	12	0.583333	0.666667	0.0833333	0.0833333	0.0833333	0	0.0833333	0.583333	1181.36	8.22223	0.0833333	4.89167	0.543519	0.260833	0.391667	0.0833333	4.89167	0.965909	0.00861111	38.525	0.25	0.333333	0.25
TCGA-BH-A0BL	CALSVHAGGTSYGKVTF	Primary Tumor	TRA	17	0.588235	0.705882	0.176471	0.0588235	0.0588235	0	0.0588235	0.647059	1697.91	8.20636	0.0588235	5	0.555556	0.276471	0.5	0.117647	5	0.88682	0.0073558	-1.04118	0.294118	0.294118	0.176471
TCGA-BH-A0BL	CCGGSQGNLIF	Primary Tumor	TRA	11	0.545455	0.636364	0.0909091	0	0	0	0	0.454545	1098.25	5.51141	0	5.14545	0.571717	0.248182	0.645455	0.0909091	5.14545	-1	0	30.1	0.272727	0.454545	0.0909091
TCGA-BH-A0BL	CAGVRADNFNKFYF	Primary Tumor	TRA	14	0.285714	0.571429	0.285714	0.214286	0.142857	0.0714286	0.214286	0.428571	1651.84	8.19733	0.0714286	4.36429	0.484921	0.289286	-0.135714	0.285714	4.36429	0.10548	0.0130166	32.6864	0.357143	0.214286	0.142857
TCGA-BH-A0BL	CIVRPYYGQNFVF	Primary Tumor	TRA	13	0.153846	0.461538	0.307692	0.0769231	0.0769231	0	0.153846	0.307692	1605.86	8.19733	0.0769231	4.87692	0.54188	0.351538	0.376923	0.307692	4.87692	0.830755	0.00850263	8.91538	0.538462	0.230769	0
TCGA-BH-A0BL	CIVRPYYGQNFVF	Primary Tumor	TRA	13	0.153846	0.461538	0.307692	0.0769231	0.0769231	0	0.153846	0.307692	1605.86	8.19733	0.0769231	4.87692	0.54188	0.351538	0.376923	0.307692	4.87692	0.830755	0.00850263	8.91538	0.538462	0.230769	0
TCGA-BH-A0BL	CAGAGANNLFF	Primary Tumor	TRA	11	0.545455	0.727273	0.181818	0	0	0	0	0.454545	1084.2	5.51813	0	5.36364	0.59596	0.249091	0.863636	0.181818	5.36364	-1	0	-6.34545	0.272727	0.363636	0.363636
TCGA-BH-A0BL	CGTYTSGTYKYIF	Primary Tumor	TRA	13	0.538462	0.538462	0.307692	0.0769231	0.0769231	0	0.0769231	0.538462	1503.67	8.15485	0.0769231	4.36923	0.48547	0.275385	-0.130769	0.307692	4.36923	0.976728	0.00850263	-10.3615	0.384615	0.230769	0
TCGA-BH-A0BL	CAGQLNPGTASKLTF	Primary Tumor	TRA	15	0.533333	0.666667	0.0666667	0.0666667	0.0666667	0	0.133333	0.666667	1507.71	8.22223	0.0666667	4.56667	0.507407	0.342667	0.0666667	0.0666667	4.56667	0.285092	0.0079798	4.32	0.2	0.333333	0.266667
TCGA-BH-A0BL	CAGQLNPGTASKLTF	Primary Tumor	TRA	15	0.533333	0.666667	0.0666667	0.0666667	0.0666667	0	0.133333	0.666667	1507.71	8.22223	0.0666667	4.56667	0.507407	0.342667	0.0666667	0.0666667	4.56667	0.285092	0.0079798	4.32	0.2	0.333333	0.266667
TCGA-BH-A0BL	CAASARGTYKYIF	Primary Tumor	TRA	13	0.538462	0.538462	0.230769	0.153846	0.153846	0	0.153846	0.615385	1450.66	9.19598	0.153846	4.67692	0.519658	0.311538	0.176923	0.230769	4.67692	0.214446	0.00959813	-3.83077	0.307692	0.153846	0.230769
TCGA-BH-A0BL	CSGVTQRRDNRKLIW	Primary Tumor	TRA	15	0.266667	0.466667	0.0666667	0.333333	0.266667	0.0666667	0.333333	0.6	1832.1	10.7636	0.2	3.45333	0.383704	0.334	-1.04667	0.0666667	3.45333	0.287357	0.0211013	31.1733	0.266667	0.2	0.0666667
TCGA-BH-A0BL	CSGVTQRRDNRKLIW	Primary Tumor	TRA	15	0.266667	0.466667	0.0666667	0.333333	0.266667	0.0666667	0.333333	0.6	1832.1	10.7636	0.2	3.45333	0.383704	0.334	-1.04667	0.0666667	3.45333	0.287357	0.0211013	31.1733	0.266667	0.2	0.0666667
TCGA-BH-A0BL	CSGVTQRRDNRKLIW	Primary Tumor	TRA	15	0.266667	0.466667	0.0666667	0.333333	0.266667	0.0666667	0.333333	0.6	1832.1	10.7636	0.2	3.45333	0.383704	0.334	-1.04667	0.0666667	3.45333	0.287357	0.0211013	31.1733	0.266667	0.2	0.0666667
TCGA-BH-A0BL	CSGVTQRRDNRKLIW	Primary Tumor	TRA	15	0.266667	0.466667	0.0666667	0.333333	0.266667	0.0666667	0.333333	0.6	1832.1	10.7636	0.2	3.45333	0.383704	0.334	-1.04667	0.0666667	3.45333	0.287357	0.0211013	31.1733	0.266667	0.2	0.0666667
TCGA-BH-A0BL	CAAQTGANNLFF	Primary Tumor	TRA	12	0.5	0.666667	0.166667	0	0	0	0	0.5	1256.39	5.51813	0	4.975	0.552778	0.288333	0.475	0.166667	4.975	-1	0	-4.98333	0.25	0.25	0.333333
TCGA-BH-A0BL	CAVRDSDYKLSF	Primary Tumor	TRA	12	0.333333	0.583333	0.166667	0.333333	0.166667	0.166667	0.333333	0.583333	1403.56	5.9527	0	4.23333	0.47037	0.3075	-0.266667	0.166667	4.23333	0.0227308	0.00399471	18.1417	0.333333	0.166667	0.166667
TCGA-AO-A0J4	CCVLLPRPSNYKLSF	Primary Tumor	TRA	15	0.266667	0.533333	0.133333	0.133333	0.133333	0	0.266667	0.4	1740.1	8.90326	0.133333	4.86	0.54	0.381333	0.36	0.133333	4.86	0.156311	0.00676768	32.14	0.4	0.333333	0.2
TCGA-AO-A0J4	CCVLLPRPSNYKLSF	Primary Tumor	TRA	15	0.266667	0.533333	0.133333	0.133333	0.133333	0	0.266667	0.4	1740.1	8.90326	0.133333	4.86	0.54	0.381333	0.36	0.133333	4.86	0.156311	0.00676768	32.14	0.4	0.333333	0.2
TCGA-AO-A0J4	CVVIQPPAGTALIF	Primary Tumor	TRA	14	0.357143	0.642857	0.0714286	0	0	0	0.142857	0.5	1428.74	5.51813	0	6.09286	0.676984	0.424286	1.59286	0.0714286	6.09286	0.787711	0	39.1071	0.428571	0.214286	0.214286
TCGA-AO-A0J4	CAENNQADSWGKLQF	Primary Tumor	TRA	15	0.333333	0.533333	0.133333	0.2	0.0666667	0.133333	0.2	0.6	1710.82	4.37018	-0.0666667	3.54667	0.394074	0.326667	-0.953333	0.133333	3.54667	0.0527758	0.0265797	9.96	0.2	0.266667	0.266667
TCGA-AO-A0J4	CAENNQADSWGKLQF	Primary Tumor	TRA	15	0.333333	0.533333	0.133333	0.2	0.0666667	0.133333	0.2	0.6	1710.82	4.37018	-0.0666667	3.54667	0.394074	0.326667	-0.953333	0.133333	3.54667	0.0527758	0.0265797	9.96	0.2	0.266667	0.266667
TCGA-AO-A0J4	CAMREGENSNYQLIW	Primary Tumor	TRA	15	0.266667	0.4	0.133333	0.2	0.0666667	0.133333	0.2	0.466667	1814.01	4.53131	-0.0666667	3.77333	0.419259	0.318	-0.726667	0.133333	3.77333	0.595519	0.0168659	-0.72	0.266667	0.266667	0.333333
TCGA-AO-A0J4	CAMREGENSNYQLIW	Primary Tumor	TRA	15	0.266667	0.4	0.133333	0.2	0.0666667	0.133333	0.2	0.466667	1814.01	4.53131	-0.0666667	3.77333	0.419259	0.318	-0.726667	0.133333	3.77333	0.595519	0.0168659	-0.72	0.266667	0.266667	0.333333
TCGA-AO-A0J4	CAMREGENSNYQLIW	Primary Tumor	TRA	15	0.266667	0.4	0.133333	0.2	0.0666667	0.133333	0.2	0.466667	1814.01	4.53131	-0.0666667	3.77333	0.419259	0.318	-0.726667	0.133333	3.77333	0.595519	0.0168659	-0.72	0.266667	0.266667	0.333333
TCGA-AO-A0J4	CALFRDGANNLFF	Primary Tumor	TRA	13	0.307692	0.538462	0.230769	0.153846	0.0769231	0.0769231	0.153846	0.384615	1487.68	5.82941	0	5.01538	0.557265	0.256154	0.515385	0.230769	5.01538	0.730628	0.00618056	2.7	0.384615	0.230769	0.307692
TCGA-AO-A0J4	CALKNFGNEKLTF	Primary Tumor	TRA	13	0.307692	0.461538	0.153846	0.230769	0.153846	0.0769231	0.230769	0.461538	1484.72	8.19781	0.0769231	4.35385	0.483761	0.305385	-0.146154	0.153846	4.35385	0.0869945	0.0125253	-12.4308	0.307692	0.230769	0.307692
TCGA-AO-A0J4	CAMKPDSGYALNF	Primary Tumor	TRA	13	0.384615	0.615385	0.153846	0.153846	0.0769231	0.0769231	0.230769	0.538462	1416.62	5.82794	0	4.46923	0.496581	0.346923	-0.0307692	0.153846	4.46923	0.553861	0.0101389	12.5692	0.230769	0.307692	0.307692
TCGA-AO-A0J4	CAMKPDSGYALNF	Primary Tumor	TRA	13	0.384615	0.615385	0.153846	0.153846	0.0769231	0.0769231	0.230769	0.538462	1416.62	5.82794	0	4.46923	0.496581	0.346923	-0.0307692	0.153846	4.46923	0.553861	0.0101389	12.5692	0.230769	0.307692	0.307692
TCGA-AO-A0J4	CCDNNAGNMLTF	Primary Tumor	TRA	12	0.416667	0.75	0.0833333	0.0833333	0	0.0833333	0.0833333	0.333333	1302.46	3.79974	-0.0833333	4.51667	0.501852	0.266667	0.0166667	0.0833333	4.51667	0.977273	0.00819444	28.425	0.166667	0.333333	0.25
TCGA-AO-A0J4	CCDPRSGSARQLTF	Primary Tumor	TRA	14	0.5	0.642857	0.0714286	0.214286	0.142857	0.0714286	0.285714	0.714286	1540.72	8.07208	0.0714286	4.00714	0.445238	0.342857	-0.492857	0.0714286	4.00714	0.0877189	0.022036	71.6143	0.142857	0.285714	0.142857
TCGA-AO-A0J4	CSEWGPTQGGSEKLVF	Primary Tumor	TRA	16	0.4375	0.5625	0.125	0.1875	0.0625	0.125	0.25	0.6875	1724.89	4.53131	-0.0625	4.05625	0.450694	0.33875	-0.44375	0.125	4.05625	0.132447	0.00949968	15.2688	0.25	0.375	0.1875
TCGA-AO-A0J4	CAVKGTSGTYKYIF	Primary Tumor	TRA	14	0.5	0.571429	0.214286	0.142857	0.142857	0	0.142857	0.571429	1537.78	9.11285	0.142857	4.67143	0.519048	0.309286	0.171429	0.214286	4.67143	0.229255	0.00473268	-10.9643	0.357143	0.214286	0.0714286
TCGA-AO-A0J4	CRSQTGANNLFF	Primary Tumor	TRA	12	0.416667	0.583333	0.166667	0.0833333	0.0833333	0	0.0833333	0.5	1357.49	8.24969	0.0833333	4.23333	0.47037	0.278333	-0.266667	0.166667	4.23333	0.988636	0.00777778	47.6833	0.25	0.333333	0.166667
TCGA-AO-A0J4	CAGQQNQFYF	Primary Tumor	TRA	10	0.3	0.4	0.3	0	0	0	0	0.5	1205.3	5.5174	0	3.92	0.435556	0.32	-0.58	0.3	3.92	-1	0	45.781	0.3	0.2	0.1
TCGA-AO-A0J4	CAVRSRVGSGGGADGLTF	Primary Tumor	TRA	18	0.611111	0.777778	0.0555556	0.166667	0.111111	0.0555556	0.166667	0.722222	1709.88	8.24957	0.0555556	4.73889	0.526543	0.260556	0.238889	0.0555556	4.73889	0.354353	0.0462221	50.9722	0.222222	0.388889	0.166667
TCGA-AO-A0J4	CAVRSRVGSGGGADGLTF	Primary Tumor	TRA	18	0.611111	0.777778	0.0555556	0.166667	0.111111	0.0555556	0.166667	0.722222	1709.88	8.24957	0.0555556	4.73889	0.526543	0.260556	0.238889	0.0555556	4.73889	0.354353	0.0462221	50.9722	0.222222	0.388889	0.166667
TCGA-AO-A0J4	CAVRSRVRSGGGADGLTF	Primary Tumor	TRA	18	0.555556	0.722222	0.0555556	0.222222	0.166667	0.0555556	0.222222	0.722222	1809.02	10.2609	0.111111	4.51111	0.501235	0.274444	0.0111111	0.0555556	4.51111	0.140471	0.0639961	80.1	0.222222	0.333333	0.166667
TCGA-AO-A0J4	CREHLNAGGTSYGKLTF	Primary Tumor	TRA	17	0.470588	0.529412	0.176471	0.176471	0.117647	0.0588235	0.176471	0.647059	1854.05	8.20648	0.0588235	3.99412	0.443791	0.271765	-0.505882	0.117647	3.99412	0.602224	0.0109939	-0.482353	0.235294	0.294118	0.235294
TCGA-AO-A0J4	CAAIRYNNNDMRF	Primary Tumor	TRA	13	0.230769	0.538462	0.153846	0.230769	0.153846	0.0769231	0.230769	0.384615	1587.78	8.22186	0.0769231	3.80769	0.423077	0.31	-0.692308	0.153846	3.80769	0.0653029	0.018234	-2.36923	0.230769	0.230769	0.230769
TCGA-AO-A0J4	CATVVNDMRF	Primary Tumor	TRA	10	0.3	0.7	0.1	0.2	0.1	0.1	0.2	0.4	1155.35	5.82941	0	5.02	0.557778	0.32	0.52	0.1	5.02	0.509756	0.0122222	1.46	0.3	0.1	0.2
TCGA-AO-A0J4	CCAMREGRGGGSQGNLIF	Primary Tumor	TRA	18	0.5	0.555556	0.0555556	0.166667	0.111111	0.0555556	0.166667	0.611111	1856.12	8.0722	0.0555556	4.36111	0.484568	0.272222	-0.138889	0.0555556	4.36111	0.724412	0.00575672	20.2333	0.166667	0.388889	0.222222
TCGA-AO-A0J4	CAMKPDSGYALNF	Primary Tumor	TRA	13	0.384615	0.615385	0.153846	0.153846	0.0769231	0.0769231	0.230769	0.538462	1416.62	5.82794	0	4.46923	0.496581	0.346923	-0.0307692	0.153846	4.46923	0.553861	0.0101389	12.5692	0.230769	0.307692	0.307692
TCGA-AO-A0J4	CAMKPDSGYALNF	Primary Tumor	TRA	13	0.384615	0.615385	0.153846	0.153846	0.0769231	0.0769231	0.230769	0.538462	1416.62	5.82794	0	4.46923	0.496581	0.346923	-0.0307692	0.153846	4.46923	0.553861	0.0101389	12.5692	0.230769	0.307692	0.307692
TCGA-AO-A0J4	CAMKPDSGYALNF	Primary Tumor	TRA	13	0.384615	0.615385	0.153846	0.153846	0.0769231	0.0769231	0.230769	0.538462	1416.62	5.82794	0	4.46923	0.496581	0.346923	-0.0307692	0.153846	4.46923	0.553861	0.0101389	12.5692	0.230769	0.307692	0.307692
TCGA-AO-A0J4	CAMKPDSGYALNF	Primary Tumor	TRA	13	0.384615	0.615385	0.153846	0.153846	0.0769231	0.0769231	0.230769	0.538462	1416.62	5.82794	0	4.46923	0.496581	0.346923	-0.0307692	0.153846	4.46923	0.553861	0.0101389	12.5692	0.230769	0.307692	0.307692
TCGA-AO-A0J4	CAMKPDSGYALNF	Primary Tumor	TRA	13	0.384615	0.615385	0.153846	0.153846	0.0769231	0.0769231	0.230769	0.538462	1416.62	5.82794	0	4.46923	0.496581	0.346923	-0.0307692	0.153846	4.46923	0.553861	0.0101389	12.5692	0.230769	0.307692	0.307692
TCGA-AO-A0J4	CAMREGENSNYQLIW	Primary Tumor	TRA	15	0.266667	0.4	0.133333	0.2	0.0666667	0.133333	0.2	0.466667	1814.01	4.53131	-0.0666667	3.77333	0.419259	0.318	-0.726667	0.133333	3.77333	0.595519	0.0168659	-0.72	0.266667	0.266667	0.333333
TCGA-AO-A0J4	CAMREGENSNYQLIW	Primary Tumor	TRA	15	0.266667	0.4	0.133333	0.2	0.0666667	0.133333	0.2	0.466667	1814.01	4.53131	-0.0666667	3.77333	0.419259	0.318	-0.726667	0.133333	3.77333	0.595519	0.0168659	-0.72	0.266667	0.266667	0.333333
TCGA-AO-A0J4	CAMREGENSNYQLIW	Primary Tumor	TRA	15	0.266667	0.4	0.133333	0.2	0.0666667	0.133333	0.2	0.466667	1814.01	4.53131	-0.0666667	3.77333	0.419259	0.318	-0.726667	0.133333	3.77333	0.595519	0.0168659	-0.72	0.266667	0.266667	0.333333
TCGA-AO-A0J4	CAMREGENSNYQLIW	Primary Tumor	TRA	15	0.266667	0.4	0.133333	0.2	0.0666667	0.133333	0.2	0.466667	1814.01	4.53131	-0.0666667	3.77333	0.419259	0.318	-0.726667	0.133333	3.77333	0.595519	0.0168659	-0.72	0.266667	0.266667	0.333333
TCGA-AO-A0J4	CAMREGENSNYQLIW	Primary Tumor	TRA	15	0.266667	0.4	0.133333	0.2	0.0666667	0.133333	0.2	0.466667	1814.01	4.53131	-0.0666667	3.77333	0.419259	0.318	-0.726667	0.133333	3.77333	0.595519	0.0168659	-0.72	0.266667	0.266667	0.333333
TCGA-AO-A0J4	CAMREGENSNYQLIW	Primary Tumor	TRA	15	0.266667	0.4	0.133333	0.2	0.0666667	0.133333	0.2	0.466667	1814.01	4.53131	-0.0666667	3.77333	0.419259	0.318	-0.726667	0.133333	3.77333	0.595519	0.0168659	-0.72	0.266667	0.266667	0.333333
TCGA-AO-A0J4	CGALNSGNTPLVF	Primary Tumor	TRA	13	0.461538	0.769231	0.0769231	0	0	0	0.0769231	0.461538	1292.46	5.51813	0	5.11538	0.568376	0.309231	0.615385	0.0769231	5.11538	0.976728	0	-10.3615	0.307692	0.461538	0.230769
TCGA-AO-A0J4	CCVLLPRPSNYKLSF	Primary Tumor	TRA	15	0.266667	0.533333	0.133333	0.133333	0.133333	0	0.266667	0.4	1740.1	8.90326	0.133333	4.86	0.54	0.381333	0.36	0.133333	4.86	0.156311	0.00676768	32.14	0.4	0.333333	0.2
TCGA-AO-A0J4	CCVLLPRPSNYKLSF	Primary Tumor	TRA	15	0.266667	0.533333	0.133333	0.133333	0.133333	0	0.266667	0.4	1740.1	8.90326	0.133333	4.86	0.54	0.381333	0.36	0.133333	4.86	0.156311	0.00676768	32.14	0.4	0.333333	0.2
TCGA-LL-A440	CCDFFSGGYQKVTF	Primary Tumor	TRA	14	0.428571	0.571429	0.285714	0.142857	0.0714286	0.0714286	0.142857	0.5	1601.8	5.82123	0	4.72143	0.524603	0.275714	0.221429	0.285714	4.72143	0.343039	0.0248025	17.0929	0.357143	0.214286	0
TCGA-LL-A440	CATDPGGSGNTGKLIF	Primary Tumor	TRA	16	0.5625	0.75	0.0625	0.125	0.0625	0.0625	0.1875	0.6875	1537.69	5.82867	0	4.44375	0.49375	0.309375	-0.05625	0.0625	4.44375	0.392036	0.0234343	-9.44375	0.1875	0.4375	0.125
TCGA-E2-A15I	CAESISASGTYKYIF	Primary Tumor	TRA	15	0.533333	0.533333	0.2	0.133333	0.0666667	0.0666667	0.133333	0.6	1639.82	5.99286	0	4.79333	0.532593	0.306	0.293333	0.2	4.79333	0.430539	0.0224495	16.5133	0.333333	0.266667	0.2
TCGA-E2-A15I	CAVEPTRGSTLGRLYF	Primary Tumor	TRA	16	0.4375	0.5625	0.125	0.1875	0.125	0.0625	0.25	0.625	1770.02	8.22198	0.0625	4.53125	0.503472	0.326875	0.03125	0.125	4.53125	0.148985	0.0198848	16.1062	0.3125	0.25	0.25
TCGA-E2-A15I	CAVSENNDMRF	Primary Tumor	TRA	11	0.272727	0.636364	0.0909091	0.272727	0.0909091	0.181818	0.272727	0.454545	1285.41	4.37018	-0.0909091	3.94545	0.438384	0.310909	-0.554545	0.0909091	3.94545	0.080246	0.0443605	19.7455	0.181818	0.272727	0.272727
TCGA-E2-A15I	CAASSGTYKYIF	Primary Tumor	TRA	12	0.583333	0.583333	0.25	0.0833333	0.0833333	0	0.0833333	0.583333	1310.47	8.17523	0.0833333	4.85	0.538889	0.295	0.35	0.25	4.85	0.965909	0.00861111	18.1417	0.333333	0.25	0.166667
TCGA-E2-A15I	CAGQVVSGNTGKLIF	Primary Tumor	TRA	15	0.466667	0.666667	0.0666667	0.0666667	0.0666667	0	0.0666667	0.533333	1493.73	8.22223	0.0666667	5.18	0.575556	0.300667	0.68	0.0666667	5.18	0.920366	0.0079798	-23.9933	0.333333	0.333333	0.133333
TCGA-E2-A15I	CAMRELTGNTGKLIF	Primary Tumor	TRA	15	0.4	0.466667	0.0666667	0.2	0.133333	0.0666667	0.2	0.533333	1653.96	8.22223	0.0666667	4.73333	0.525926	0.303333	0.233333	0.0666667	4.73333	0.290505	0.0126571	-29.6533	0.266667	0.2	0.333333
TCGA-E2-A15I	CVPRDDKIIF	Primary Tumor	TRA	10	0.1	0.5	0.1	0.4	0.2	0.2	0.5	0.5	1205.43	5.95343	0	4.65	0.516667	0.413	0.15	0.1	4.65	0.639059	0.00135802	-3.8	0.4	0.1	0
TCGA-E2-A15I	CTIAPTKDNYGQNFVF	Primary Tumor	TRA	16	0.3125	0.625	0.1875	0.125	0.0625	0.0625	0.1875	0.5	1818.01	5.82794	0	4.25	0.472222	0.355625	-0.25	0.1875	4.25	0.575841	0.00585859	27.0875	0.3125	0.25	0.0625
TCGA-E2-A15I	CTIAPTKDNYGQNFVF	Primary Tumor	TRA	16	0.3125	0.625	0.1875	0.125	0.0625	0.0625	0.1875	0.5	1818.01	5.82794	0	4.25	0.472222	0.355625	-0.25	0.1875	4.25	0.575841	0.00585859	27.0875	0.3125	0.25	0.0625
TCGA-E2-A15I	CGTPNQAGTALIF	Primary Tumor	TRA	13	0.538462	0.692308	0.0769231	0	0	0	0.0769231	0.615385	1292.46	5.51813	0	4.99231	0.554701	0.345385	0.492308	0.0769231	4.99231	0.976728	0	-9.63077	0.230769	0.307692	0.230769
TCGA-E2-A15I	CAVTFNSGYSTLTF	Primary Tumor	TRA	14	0.571429	0.714286	0.214286	0	0	0	0	0.5	1510.67	5.5174	0	5.14286	0.571429	0.262857	0.642857	0.214286	5.14286	-1	0	14.7857	0.357143	0.285714	0.142857
TCGA-E2-A15I	CAVTFNSGYSTLTF	Primary Tumor	TRA	14	0.571429	0.714286	0.214286	0	0	0	0	0.5	1510.67	5.5174	0	5.14286	0.571429	0.262857	0.642857	0.214286	5.14286	-1	0	14.7857	0.357143	0.285714	0.142857
TCGA-E2-A1BC	CAVGSTGTASKLTF	Primary Tumor	TRA	14	0.714286	0.785714	0.0714286	0.0714286	0.0714286	0	0.0714286	0.714286	1342.52	8.22223	0.0714286	5.10714	0.56746	0.289286	0.607143	0.0714286	5.10714	0.945517	0.00826959	-6.15714	0.214286	0.285714	0.214286
TCGA-E2-A1BC	CAVNSGGSNYKLTF	Primary Tumor	TRA	14	0.5	0.714286	0.142857	0.0714286	0.0714286	0	0.0714286	0.5	1460.61	8.19745	0.0714286	4.48571	0.498413	0.273571	-0.0142857	0.142857	4.48571	0.945517	0.00826959	20.85	0.285714	0.428571	0.142857
TCGA-E2-A1BC	CAALGDTDKLIF	Primary Tumor	TRA	12	0.416667	0.583333	0.0833333	0.25	0.0833333	0.166667	0.25	0.583333	1266.46	4.20782	-0.0833333	5.25	0.583333	0.303333	0.75	0.0833333	5.25	0.204948	0.0223457	-17.5083	0.333333	0.0833333	0.333333
TCGA-E2-A1BC	CAESYPRDAGNMLTF	Primary Tumor	TRA	15	0.4	0.6	0.133333	0.2	0.0666667	0.133333	0.266667	0.6	1674.85	4.37018	-0.0666667	4.15333	0.461481	0.338	-0.346667	0.133333	4.15333	0.434003	0.00680415	27.94	0.2	0.266667	0.333333
TCGA-B6-A0RE	CTIASSESRGGATNKLIF	Primary Tumor	TRA	18	0.555556	0.611111	0.0555556	0.166667	0.111111	0.0555556	0.166667	0.666667	1855.08	8.22223	0.0555556	4.59444	0.510494	0.301667	0.0944444	0.0555556	4.59444	0.309349	0.0163028	67.8667	0.222222	0.333333	0.222222
TCGA-B6-A0RE	CAGKYGNKLVF	Primary Tumor	TRA	11	0.363636	0.545455	0.181818	0.181818	0.181818	0	0.181818	0.454545	1199.42	9.1972	0.181818	4.65455	0.517172	0.301818	0.154545	0.181818	4.65455	0.0967284	0.00744458	-0.254545	0.363636	0.272727	0.181818
TCGA-B6-A0RE	CAVLNNYGQNFVF	Primary Tumor	TRA	13	0.230769	0.615385	0.230769	0	0	0	0	0.230769	1488.66	5.5174	0	4.99231	0.554701	0.284615	0.492308	0.230769	4.99231	-1	0	-8.86154	0.461538	0.307692	0.153846
TCGA-A2-A0EM	CGTERETGFQKLVF	Primary Tumor	TRA	14	0.357143	0.428571	0.142857	0.285714	0.142857	0.142857	0.285714	0.642857	1614.82	6.13605	0	4.14286	0.460317	0.316429	-0.357143	0.142857	4.14286	0.0815991	0.0159822	4.85	0.285714	0.142857	0.214286
TCGA-A2-A04U	CAVPRMDSNYQLIW	Primary Tumor	TRA	14	0.214286	0.5	0.142857	0.142857	0.0714286	0.0714286	0.214286	0.428571	1695.96	5.82867	0	4.43571	0.492857	0.372857	-0.0642857	0.142857	4.43571	0.499394	0.0126296	31.4143	0.357143	0.214286	0.214286
TCGA-A2-A0YG	CAPSMDSSYKLIF	Primary Tumor	TRA	13	0.384615	0.538462	0.153846	0.153846	0.0769231	0.0769231	0.230769	0.538462	1461.7	5.82794	0	4.85385	0.539316	0.354615	0.353846	0.153846	4.85385	0.0776324	0.0259722	61.9615	0.307692	0.307692	0.230769
TCGA-A2-A0YG	CRDPVPHAGNNRKLIW	Primary Tumor	TRA	16	0.1875	0.5625	0.125	0.25	0.1875	0.0625	0.375	0.5625	1876.15	9.50446	0.125	3.60625	0.400694	0.39875	-0.89375	0.0625	3.60625	0.130642	0.0367472	22.8375	0.25	0.3125	0.125
TCGA-GM-A2D9	CAAGLNNDMRF	Primary Tumor	TRA	11	0.363636	0.636364	0.0909091	0.181818	0.0909091	0.0909091	0.181818	0.454545	1211.37	5.82941	0	4.42727	0.491919	0.282727	-0.0727273	0.0909091	4.42727	0.645799	0.0103439	2.23636	0.181818	0.272727	0.363636
TCGA-GM-A2D9	CAVQALDNAGNMLTF	Primary Tumor	TRA	15	0.4	0.666667	0.0666667	0.0666667	0	0.0666667	0.0666667	0.466667	1567.78	3.79987	-0.0666667	5.12	0.568889	0.305333	0.62	0.0666667	5.12	1	0.00914141	11.9	0.266667	0.2	0.4
TCGA-GM-A2D9	CAVQALDNAGNMLPF	Primary Tumor	TRA	15	0.333333	0.666667	0.0666667	0.0666667	0	0.0666667	0.133333	0.466667	1563.8	3.79987	-0.0666667	5.06	0.562222	0.350667	0.56	0.0666667	5.06	0.378018	0.00914141	29.3533	0.266667	0.266667	0.4
TCGA-GM-A2D9	CAVQALDNAGNMLTF	Primary Tumor	TRA	15	0.4	0.666667	0.0666667	0.0666667	0	0.0666667	0.0666667	0.466667	1567.78	3.79987	-0.0666667	5.12	0.568889	0.305333	0.62	0.0666667	5.12	1	0.00914141	11.9	0.266667	0.2	0.4
TCGA-GM-A2D9	CAAGLNNDMRF	Primary Tumor	TRA	11	0.363636	0.636364	0.0909091	0.181818	0.0909091	0.0909091	0.181818	0.454545	1211.37	5.82941	0	4.42727	0.491919	0.282727	-0.0727273	0.0909091	4.42727	0.645799	0.0103439	2.23636	0.181818	0.272727	0.363636
TCGA-GM-A2D9	CAVQALDNAGNMLTF	Primary Tumor	TRA	15	0.4	0.666667	0.0666667	0.0666667	0	0.0666667	0.0666667	0.466667	1567.78	3.79987	-0.0666667	5.12	0.568889	0.305333	0.62	0.0666667	5.12	1	0.00914141	11.9	0.266667	0.2	0.4
TCGA-GM-A2D9	CAVQALDNAGNMLTF	Primary Tumor	TRA	15	0.4	0.666667	0.0666667	0.0666667	0	0.0666667	0.0666667	0.466667	1567.78	3.79987	-0.0666667	5.12	0.568889	0.305333	0.62	0.0666667	5.12	1	0.00914141	11.9	0.266667	0.2	0.4
TCGA-GM-A2D9	CAVQALDNAGNMLPF	Primary Tumor	TRA	15	0.333333	0.666667	0.0666667	0.0666667	0	0.0666667	0.133333	0.466667	1563.8	3.79987	-0.0666667	5.06	0.562222	0.350667	0.56	0.0666667	5.06	0.378018	0.00914141	29.3533	0.266667	0.266667	0.4
TCGA-EW-A1PA	CALANTGNQFYF	Primary Tumor	TRA	12	0.416667	0.583333	0.25	0	0	0	0	0.416667	1348.48	5.5174	0	4.71667	0.524074	0.278333	0.216667	0.25	4.71667	-1	0	2.5425	0.333333	0.25	0.25
TCGA-GM-A2DD	CTTASWVTDPGGGADGLTF	Primary Tumor	TRA	19	0.631579	0.842105	0.105263	0.105263	0	0.105263	0.157895	0.736842	1855.97	3.56366	-0.105263	4.61579	0.512865	0.298947	0.115789	0.105263	4.61579	0.491842	0.00750682	28.2421	0.210526	0.315789	0.157895
TCGA-GM-A2DD	CRLSYLPLCSYDNYGQNFVF	Primary Tumor	TRA	20	0.25	0.5	0.25	0.1	0.05	0.05	0.15	0.35	2402.7	5.82062	0	4.51	0.501111	0.303	0.01	0.25	4.51	0.318655	0.0161574	19.21	0.45	0.3	0.15
TCGA-GM-A2DD	CVVYGGSQGNLIF	Primary Tumor	TRA	13	0.384615	0.615385	0.153846	0	0	0	0	0.384615	1356.55	5.5174	0	5.4	0.6	0.27	0.9	0.153846	5.4	-1	0	8.87692	0.461538	0.384615	0.0769231
TCGA-GM-A2DD	CVVYGGSQGNLIF	Primary Tumor	TRA	13	0.384615	0.615385	0.153846	0	0	0	0	0.384615	1356.55	5.5174	0	5.4	0.6	0.27	0.9	0.153846	5.4	-1	0	8.87692	0.461538	0.384615	0.0769231
TCGA-GM-A2DD	CALSEPSAGSYQLTF	Primary Tumor	TRA	15	0.533333	0.6	0.133333	0.0666667	0	0.0666667	0.133333	0.666667	1573.72	3.99957	-0.0666667	4.70667	0.522963	0.334	0.206667	0.133333	4.70667	0.949045	0.00886364	56.08	0.266667	0.333333	0.333333
TCGA-GM-A2DD	CALSEPSAGSYQLTF	Primary Tumor	TRA	15	0.533333	0.6	0.133333	0.0666667	0	0.0666667	0.133333	0.666667	1573.72	3.99957	-0.0666667	4.70667	0.522963	0.334	0.206667	0.133333	4.70667	0.949045	0.00886364	56.08	0.266667	0.333333	0.333333
TCGA-GM-A2DD	CAGGLDTDKLIF	Primary Tumor	TRA	12	0.416667	0.583333	0.0833333	0.25	0.0833333	0.166667	0.25	0.583333	1252.44	4.20782	-0.0833333	5.06667	0.562963	0.283333	0.566667	0.0833333	5.06667	0.204948	0.0223457	-7.225	0.333333	0.166667	0.25
TCGA-GM-A2DD	CAATPSGSARQLTF	Primary Tumor	TRA	14	0.642857	0.714286	0.0714286	0.0714286	0.0714286	0	0.142857	0.785714	1409.57	8.24969	0.0714286	4.60714	0.511905	0.352143	0.107143	0.0714286	4.60714	0.104743	0.00906148	45.6143	0.142857	0.285714	0.285714
TCGA-GM-A2DD	CALSDAGTSYGKLTF	Primary Tumor	TRA	15	0.6	0.666667	0.133333	0.133333	0.0666667	0.0666667	0.133333	0.666667	1533.7	5.82794	0	4.76667	0.52963	0.275333	0.266667	0.133333	4.76667	0.24067	0.0288636	-5.08	0.266667	0.266667	0.266667
TCGA-GM-A2DD	CAVFISNFGNEKLTF	Primary Tumor	TRA	15	0.333333	0.533333	0.2	0.133333	0.0666667	0.0666667	0.133333	0.4	1689.93	5.99432	0	5.09333	0.565926	0.290667	0.593333	0.2	5.09333	0.999558	0.00320707	-3.78	0.4	0.266667	0.2
TCGA-GM-A2DD	CAVFISNFGNEKLTF	Primary Tumor	TRA	15	0.333333	0.533333	0.2	0.133333	0.0666667	0.0666667	0.133333	0.4	1689.93	5.99432	0	5.09333	0.565926	0.290667	0.593333	0.2	5.09333	0.999558	0.00320707	-3.78	0.4	0.266667	0.2
TCGA-GM-A2DD	CAVFISNFGNEKLTF	Primary Tumor	TRA	15	0.333333	0.533333	0.2	0.133333	0.0666667	0.0666667	0.133333	0.4	1689.93	5.99432	0	5.09333	0.565926	0.290667	0.593333	0.2	5.09333	0.999558	0.00320707	-3.78	0.4	0.266667	0.2
TCGA-GM-A2DD	CAVFISNFGNEKLTF	Primary Tumor	TRA	15	0.333333	0.533333	0.2	0.133333	0.0666667	0.0666667	0.133333	0.4	1689.93	5.99432	0	5.09333	0.565926	0.290667	0.593333	0.2	5.09333	0.999558	0.00320707	-3.78	0.4	0.266667	0.2
TCGA-GM-A2DD	CVVYGGSQGKLIF	Primary Tumor	TRA	13	0.384615	0.538462	0.153846	0.0769231	0.0769231	0	0.0769231	0.461538	1370.62	8.19745	0.0769231	5.36923	0.596581	0.292308	0.869231	0.153846	5.36923	0.976728	0.00850263	2.34615	0.461538	0.307692	0.0769231
TCGA-GM-A2DD	CAVANNRKLIW	Primary Tumor	TRA	11	0.272727	0.545455	0.0909091	0.181818	0.181818	0	0.181818	0.363636	1287.53	9.50775	0.181818	4.70909	0.523232	0.34	0.209091	0.0909091	4.70909	0.562986	0.0287733	1.37273	0.363636	0.181818	0.272727
TCGA-GM-A2DD	CAVANNRKLIW	Primary Tumor	TRA	11	0.272727	0.545455	0.0909091	0.181818	0.181818	0	0.181818	0.363636	1287.53	9.50775	0.181818	4.70909	0.523232	0.34	0.209091	0.0909091	4.70909	0.562986	0.0287733	1.37273	0.363636	0.181818	0.272727
TCGA-GM-A2DD	CAVANNRKLIW	Primary Tumor	TRA	11	0.272727	0.545455	0.0909091	0.181818	0.181818	0	0.181818	0.363636	1287.53	9.50775	0.181818	4.70909	0.523232	0.34	0.209091	0.0909091	4.70909	0.562986	0.0287733	1.37273	0.363636	0.181818	0.272727
TCGA-GM-A2DD	CAVANNRKLIW	Primary Tumor	TRA	11	0.272727	0.545455	0.0909091	0.181818	0.181818	0	0.181818	0.363636	1287.53	9.50775	0.181818	4.70909	0.523232	0.34	0.209091	0.0909091	4.70909	0.562986	0.0287733	1.37273	0.363636	0.181818	0.272727
TCGA-GM-A2DD	CAVGPSSNTGKLIF	Primary Tumor	TRA	14	0.5	0.714286	0.0714286	0.0714286	0.0714286	0	0.142857	0.571429	1393.61	8.22223	0.0714286	5.03571	0.559524	0.335714	0.535714	0.0714286	5.03571	0.115471	0.00826959	6.47857	0.285714	0.428571	0.142857
TCGA-GM-A2DD	CAVGPSSNTGKLIF	Primary Tumor	TRA	14	0.5	0.714286	0.0714286	0.0714286	0.0714286	0	0.142857	0.571429	1393.61	8.22223	0.0714286	5.03571	0.559524	0.335714	0.535714	0.0714286	5.03571	0.115471	0.00826959	6.47857	0.285714	0.428571	0.142857
TCGA-GM-A2DD	CAVGPSSNTGKLIF	Primary Tumor	TRA	14	0.5	0.714286	0.0714286	0.0714286	0.0714286	0	0.142857	0.571429	1393.61	8.22223	0.0714286	5.03571	0.559524	0.335714	0.535714	0.0714286	5.03571	0.115471	0.00826959	6.47857	0.285714	0.428571	0.142857
TCGA-GM-A2DD	CAVGPSSNTGKLIF	Primary Tumor	TRA	14	0.5	0.714286	0.0714286	0.0714286	0.0714286	0	0.142857	0.571429	1393.61	8.22223	0.0714286	5.03571	0.559524	0.335714	0.535714	0.0714286	5.03571	0.115471	0.00826959	6.47857	0.285714	0.428571	0.142857
TCGA-GM-A2DD	CAMREATNAGKSTF	Primary Tumor	TRA	14	0.571429	0.642857	0.0714286	0.214286	0.142857	0.0714286	0.214286	0.714286	1486.67	8.22223	0.0714286	4.11429	0.457143	0.323571	-0.385714	0.0714286	4.11429	0.163533	0.0136974	-4.08571	0.0714286	0.214286	0.357143
TCGA-BH-A0EE	CTSVQQASFGNEKLTF	Primary Tumor	TRA	16	0.4375	0.5625	0.125	0.125	0.0625	0.0625	0.125	0.625	1759.93	5.99432	0	4.2875	0.476389	0.321875	-0.2125	0.125	4.2875	1	0.00292929	38.8875	0.25	0.25	0.1875
TCGA-BH-A0EE	CILRDETNAGKSTF	Primary Tumor	TRA	14	0.428571	0.571429	0.0714286	0.285714	0.142857	0.142857	0.285714	0.642857	1554.72	6.06256	0	4.06429	0.451587	0.311429	-0.435714	0.0714286	4.06429	0.0815991	0.030155	28.8143	0.214286	0.214286	0.214286
TCGA-BH-A0EE	CCCVLLHPTGANSKLTF	Primary Tumor	TRA	17	0.470588	0.647059	0.117647	0.0588235	0.0588235	0	0.117647	0.470588	1807.17	7.96796	0.0588235	5.25882	0.584314	0.32	0.758824	0.0588235	5.25882	0.352029	0.0073558	-4.44118	0.294118	0.235294	0.235294
TCGA-BH-A0EE	CASTIQGAQKLVF	Primary Tumor	TRA	13	0.461538	0.538462	0.0769231	0.0769231	0.0769231	0	0.0769231	0.615385	1365.6	8.22223	0.0769231	5.16154	0.573504	0.345385	0.661538	0.0769231	5.16154	0.976728	0.00850263	-3.83077	0.307692	0.153846	0.230769
TCGA-BH-A0EE	CAGARRYSGGGADGLTF	Primary Tumor	TRA	17	0.647059	0.705882	0.117647	0.176471	0.117647	0.0588235	0.176471	0.764706	1658.79	8.22186	0.0588235	4.33529	0.481699	0.252353	-0.164706	0.117647	4.33529	0.29713	0.0569795	45.4647	0.176471	0.352941	0.235294
TCGA-BH-A0EE	CAGARRYSGGGADGLTF	Primary Tumor	TRA	17	0.647059	0.705882	0.117647	0.176471	0.117647	0.0588235	0.176471	0.764706	1658.79	8.22186	0.0588235	4.33529	0.481699	0.252353	-0.164706	0.117647	4.33529	0.29713	0.0569795	45.4647	0.176471	0.352941	0.235294
TCGA-BH-A0EE	CAVSGLSGGGADGLTF	Primary Tumor	TRA	16	0.6875	0.8125	0.0625	0.0625	0	0.0625	0.0625	0.6875	1411.54	3.79987	-0.0625	5.30625	0.589583	0.23625	0.80625	0.0625	5.30625	0.97589	0.00860953	21.9	0.25	0.4375	0.25
TCGA-BH-A0EE	CAVIRINTGTASKLTF	Primary Tumor	TRA	16	0.5	0.625	0.0625	0.125	0.125	0	0.125	0.5625	1694.99	9.50775	0.125	5.16875	0.574306	0.319375	0.66875	0.0625	5.16875	0.323482	0.00619318	-4.1375	0.3125	0.1875	0.1875
TCGA-BH-A0EE	CNERCGDMRF	Primary Tumor	TRA	10	0.3	0.5	0.1	0.4	0.2	0.2	0.4	0.5	1230.4	6.05634	0	3.48	0.386667	0.291	-1.02	0.1	3.48	0.00531952	0.0012963	1.46	0.1	0.2	0.2
TCGA-BH-A0EE	CAPRGKNNARLMF	Primary Tumor	TRA	13	0.307692	0.538462	0.0769231	0.230769	0.230769	0	0.307692	0.538462	1477.76	10.8604	0.230769	3.93846	0.437607	0.365385	-0.561538	0.0769231	3.93846	0.0720735	0.0110856	5.18462	0.153846	0.307692	0.307692
TCGA-BH-A0EE	CAAGAGSYQLTF	Primary Tumor	TRA	12	0.666667	0.666667	0.166667	0	0	0	0	0.666667	1188.31	5.5174	0	5.11667	0.568519	0.280833	0.616667	0.166667	5.11667	-1	0	12.375	0.25	0.25	0.333333
TCGA-BH-A0EE	CATRAAGNKLTF	Primary Tumor	TRA	12	0.583333	0.666667	0.0833333	0.166667	0.166667	0	0.166667	0.666667	1252.44	9.50775	0.166667	4.56667	0.507407	0.3125	0.0666667	0.0833333	4.56667	0.0470281	0.00253968	25.0333	0.166667	0.166667	0.333333
TCGA-BH-A0DL	CLLPLCCERSGNYGQNFVF	Primary Tumor	TRA	19	0.315789	0.526316	0.157895	0.105263	0.0526316	0.0526316	0.157895	0.368421	2163.5	5.98065	0	4.8	0.533333	0.306316	0.3	0.157895	4.8	0.681336	0.00465079	36.0263	0.368421	0.315789	0.210526
TCGA-BH-A0DL	CLLPLCCERSGNYGQNFVF	Primary Tumor	TRA	19	0.315789	0.526316	0.157895	0.105263	0.0526316	0.0526316	0.157895	0.368421	2163.5	5.98065	0	4.8	0.533333	0.306316	0.3	0.157895	4.8	0.681336	0.00465079	36.0263	0.368421	0.315789	0.210526
TCGA-BH-A0DL	CALDDNTDKLIF	Primary Tumor	TRA	12	0.25	0.583333	0.0833333	0.333333	0.0833333	0.25	0.333333	0.5	1367.52	3.92999	-0.166667	4.55	0.505556	0.309167	0.05	0.0833333	4.55	0.0111762	0.0596781	-12.0583	0.333333	0.0833333	0.25
TCGA-BH-A0DL	CALSEGGSARQLTF	Primary Tumor	TRA	14	0.571429	0.571429	0.0714286	0.142857	0.0714286	0.0714286	0.142857	0.714286	1439.59	5.99493	0	4.63571	0.515079	0.287857	0.135714	0.0714286	4.63571	0.104743	0.0323457	54.4286	0.214286	0.285714	0.357143
TCGA-BH-A0DL	CAARRNNAGNMLTF	Primary Tumor	TRA	14	0.428571	0.642857	0.0714286	0.142857	0.142857	0	0.142857	0.5	1538.75	10.3519	0.142857	4.2	0.466667	0.296429	-0.3	0.0714286	4.2	0.922771	0.0311189	61.7643	0.142857	0.285714	0.357143
TCGA-BH-A0DL	CIDTSNSGGSNYKLTF	Primary Tumor	TRA	16	0.5	0.6875	0.125	0.125	0.0625	0.0625	0.125	0.5625	1706.83	5.82794	0	4.08125	0.453472	0.27	-0.41875	0.125	4.08125	0.472078	0.0205051	10.1	0.25	0.4375	0.0625
TCGA-BH-A0DL	CISVLMGMKTSYDKVIF	Primary Tumor	TRA	17	0.294118	0.470588	0.117647	0.176471	0.117647	0.0588235	0.176471	0.411765	1935.37	8.17523	0.0588235	5.38235	0.598039	0.325882	0.882353	0.117647	5.38235	0.521326	0.00890981	13.3529	0.411765	0.176471	0.176471
TCGA-BH-A0DL	CAANRDDKIIF	Primary Tumor	TRA	11	0.272727	0.545455	0.0909091	0.363636	0.181818	0.181818	0.363636	0.545455	1265.44	5.95343	0	4.40909	0.489899	0.340909	-0.0909091	0.0909091	4.40909	0.0547818	0.00400647	-6.34545	0.272727	0.0909091	0.181818
TCGA-BH-A0DL	CAGQGGSEKLVF	Primary Tumor	TRA	12	0.5	0.583333	0.0833333	0.166667	0.0833333	0.0833333	0.166667	0.666667	1195.35	5.99432	0	4.68333	0.52037	0.296667	0.183333	0.0833333	4.68333	0.71572	0.00448413	28.425	0.25	0.333333	0.25
TCGA-BH-A0DL	CAVSAEIQGAQKLVF	Primary Tumor	TRA	15	0.4	0.533333	0.0666667	0.133333	0.0666667	0.0666667	0.133333	0.6	1563.82	5.99432	0	5.28667	0.587407	0.356667	0.786667	0.0666667	5.28667	0.188148	0.0302525	10.8533	0.333333	0.133333	0.333333
TCGA-BH-A0DL	CIDTSNSGGSNYKLTF	Primary Tumor	TRA	16	0.5	0.6875	0.125	0.125	0.0625	0.0625	0.125	0.5625	1706.83	5.82794	0	4.08125	0.453472	0.27	-0.41875	0.125	4.08125	0.472078	0.0205051	10.1	0.25	0.4375	0.0625
TCGA-BH-A0DL	CIVRVGDMRF	Primary Tumor	TRA	10	0.2	0.5	0.1	0.3	0.2	0.1	0.3	0.4	1195.46	8.24957	0.1	5.22	0.58	0.314	0.72	0.1	5.22	0.0683377	0.00716049	-15.52	0.4	0.1	0.1
TCGA-BH-A0DL	CAGARSSSNTGKLIF	Primary Tumor	TRA	15	0.6	0.666667	0.0666667	0.133333	0.133333	0	0.133333	0.666667	1511.7	9.50775	0.133333	4.59333	0.51037	0.286667	0.0933333	0.0666667	4.59333	0.24067	0.00482323	36.0067	0.2	0.4	0.2
TCGA-BH-A0DL	CGEQEAGANNLFF	Primary Tumor	TRA	13	0.384615	0.538462	0.153846	0.153846	0	0.153846	0.153846	0.538462	1399.48	3.79498	-0.153846	4.28462	0.476068	0.287692	-0.215385	0.153846	4.28462	0.750084	0.0260939	26.5308	0.230769	0.307692	0.384615
TCGA-BH-A0DL	CGEQEAGANNLFF	Primary Tumor	TRA	13	0.384615	0.538462	0.153846	0.153846	0	0.153846	0.153846	0.538462	1399.48	3.79498	-0.153846	4.28462	0.476068	0.287692	-0.215385	0.153846	4.28462	0.750084	0.0260939	26.5308	0.230769	0.307692	0.384615
TCGA-BH-A0DL	CAVKRDDKIIF	Primary Tumor	TRA	11	0.181818	0.454545	0.0909091	0.454545	0.272727	0.181818	0.454545	0.545455	1307.56	8.19745	0.0909091	4.59091	0.510101	0.369091	0.0909091	0.0909091	4.59091	0.353757	0.01118	20.6727	0.363636	0	0.0909091
TCGA-BH-A0DL	CAMRANDYKLSF	Primary Tumor	TRA	12	0.333333	0.5	0.166667	0.25	0.166667	0.0833333	0.25	0.5	1418.64	8.19733	0.0833333	4.25833	0.473148	0.313333	-0.241667	0.166667	4.25833	0.0856921	0.00751102	-4.19167	0.25	0.166667	0.333333
TCGA-A2-A1FW	CALRLGNTGKLIF	Primary Tumor	TRA	13	0.384615	0.461538	0.0769231	0.153846	0.153846	0	0.153846	0.461538	1405.71	9.50775	0.153846	5.23846	0.582051	0.283846	0.738462	0.0769231	5.23846	0.0968171	0.00234385	-8.60769	0.384615	0.230769	0.307692
TCGA-A2-A1FW	CALRLGNTGKLIF	Primary Tumor	TRA	13	0.384615	0.461538	0.0769231	0.153846	0.153846	0	0.153846	0.461538	1405.71	9.50775	0.153846	5.23846	0.582051	0.283846	0.738462	0.0769231	5.23846	0.0968171	0.00234385	-8.60769	0.384615	0.230769	0.307692
TCGA-A2-A1FW	CALRLGNTGKLIF	Primary Tumor	TRA	13	0.384615	0.461538	0.0769231	0.153846	0.153846	0	0.153846	0.461538	1405.71	9.50775	0.153846	5.23846	0.582051	0.283846	0.738462	0.0769231	5.23846	0.0968171	0.00234385	-8.60769	0.384615	0.230769	0.307692
TCGA-E9-A6HE	CAGPETSGSRLTF	Primary Tumor	TRA	13	0.615385	0.692308	0.0769231	0.153846	0.0769231	0.0769231	0.230769	0.769231	1325.45	5.99493	0	4.30769	0.478632	0.323846	-0.192308	0.0769231	4.30769	0.0869945	0.0321528	46.9077	0.153846	0.384615	0.230769
TCGA-E9-A6HE	CCPHFGNEKLTF	Primary Tumor	TRA	12	0.333333	0.5	0.25	0.166667	0.0833333	0.0833333	0.25	0.5	1395.6	6.73077	0	4.3	0.477778	0.331667	-0.2	0.166667	4.3	0.0749788	0.00448413	12.7083	0.25	0.25	0.166667
TCGA-D8-A145	CALSEAGSIDSSNTGKLIF	Primary Tumor	TRA	19	0.526316	0.631579	0.0526316	0.157895	0.0526316	0.105263	0.157895	0.631579	1913.11	4.37018	-0.0526316	4.83684	0.537427	0.29	0.336842	0.0526316	4.83684	0.0790261	0.0294318	22.0105	0.263158	0.368421	0.263158
TCGA-D8-A145	CILRDRSNYGGSQGNLIF	Primary Tumor	TRA	18	0.333333	0.5	0.111111	0.166667	0.111111	0.0555556	0.166667	0.5	2013.24	8.22186	0.0555556	4.21111	0.467901	0.273889	-0.288889	0.111111	4.21111	0.892469	0.00270783	59.1889	0.333333	0.388889	0.111111
TCGA-D8-A145	CYERPDSGAGSYQLTF	Primary Tumor	TRA	16	0.4375	0.5625	0.1875	0.1875	0.0625	0.125	0.25	0.6875	1793.91	4.37018	-0.0625	3.7875	0.420833	0.32625	-0.7125	0.1875	3.7875	0.751198	0.00521096	26.4313	0.25	0.3125	0.1875
TCGA-D8-A27M	CAVRLNPGFQKLVF	Primary Tumor	TRA	14	0.214286	0.5	0.142857	0.142857	0.142857	0	0.214286	0.428571	1591.92	9.50775	0.142857	5.10714	0.56746	0.363571	0.607143	0.142857	5.10714	0.0876016	0.00473268	1.16429	0.428571	0.214286	0.214286
TCGA-D8-A27M	CAVRLNTGFQKLVF	Primary Tumor	TRA	14	0.285714	0.5	0.142857	0.142857	0.142857	0	0.142857	0.428571	1595.91	9.50775	0.142857	5.17143	0.574603	0.315	0.671429	0.142857	5.17143	0.229255	0.00473268	-8.90714	0.428571	0.142857	0.214286
TCGA-D8-A27M	CSVWYNQEGQLIF	Primary Tumor	TRA	13	0.230769	0.384615	0.230769	0.0769231	0	0.0769231	0.0769231	0.384615	1586.76	3.99957	-0.0769231	4.53077	0.503419	0.312308	0.0307692	0.230769	4.53077	0.995249	0.00928254	18.2462	0.461538	0.230769	0.153846
TCGA-D8-A27M	CAVRARWNQAGTALIF	Primary Tumor	TRA	16	0.4375	0.5625	0.125	0.125	0.125	0	0.125	0.5625	1777.06	10.3519	0.125	4.9375	0.548611	0.32375	0.4375	0.125	4.9375	0.875594	0.0256629	42.8688	0.3125	0.125	0.3125
TCGA-D8-A27M	CAETPLVTGFQKLVF	Primary Tumor	TRA	15	0.333333	0.533333	0.133333	0.133333	0.0666667	0.0666667	0.2	0.533333	1652.95	5.99432	0	5.27333	0.585926	0.366667	0.773333	0.133333	5.27333	0.266768	0.0224495	-7.64667	0.4	0.133333	0.266667
TCGA-B6-A401	CAVRGNNNARLMF	Primary Tumor	TRA	13	0.307692	0.615385	0.0769231	0.153846	0.153846	0	0.153846	0.384615	1465.7	10.3519	0.153846	4.41538	0.490598	0.296154	-0.0846154	0.0769231	4.41538	0.0968171	0.00234385	-3.83077	0.230769	0.307692	0.307692
TCGA-B6-A401	CFLLLCYGYQNQAGTALIF	Primary Tumor	TRA	19	0.368421	0.421053	0.210526	0	0	0	0	0.368421	2138.51	5.51007	0	5.51579	0.612865	0.281053	1.01579	0.210526	5.51579	-1	0	-7.9	0.473684	0.157895	0.315789
TCGA-B6-A401	CTTASWAPGGGADGLTF	Primary Tumor	TRA	17	0.705882	0.823529	0.117647	0.0588235	0	0.0588235	0.117647	0.764706	1611.73	3.79987	-0.0588235	4.73529	0.526144	0.296471	0.235294	0.117647	4.73529	0.372328	0.0083297	42.8647	0.176471	0.352941	0.235294
TCGA-B6-A401	CALLDNAGNMLTF	Primary Tumor	TRA	13	0.384615	0.615385	0.0769231	0.0769231	0	0.0769231	0.0769231	0.384615	1382.6	3.79987	-0.0769231	5.31538	0.590598	0.271538	0.815385	0.0769231	5.31538	1	0.009149	12.1923	0.307692	0.230769	0.461538
TCGA-B6-A401	CFLLLCYGYQNQAGTALIF	Primary Tumor	TRA	19	0.368421	0.421053	0.210526	0	0	0	0	0.368421	2138.51	5.51007	0	5.51579	0.612865	0.281053	1.01579	0.210526	5.51579	-1	0	-7.9	0.473684	0.157895	0.315789
TCGA-A8-A07R	CAVISRQAGTALIF	Primary Tumor	TRA	14	0.5	0.571429	0.0714286	0.0714286	0.0714286	0	0.0714286	0.571429	1449.72	8.24969	0.0714286	5.77143	0.64127	0.324286	1.27143	0.0714286	5.77143	1	0.00928193	30.7357	0.357143	0.142857	0.285714
TCGA-BH-A0HF	CLLLCSMSGSARQLTF	Primary Tumor	TRA	16	0.5	0.5	0.0625	0.0625	0.0625	0	0.0625	0.5	1730.08	8.07208	0.0625	5.45	0.605556	0.2775	0.95	0.0625	5.45	0.97589	0.00860953	68.625	0.3125	0.25	0.375
TCGA-BH-A0HF	CLLLCSMSGSARQLTF	Primary Tumor	TRA	16	0.5	0.5	0.0625	0.0625	0.0625	0	0.0625	0.5	1730.08	8.07208	0.0625	5.45	0.605556	0.2775	0.95	0.0625	5.45	0.97589	0.00860953	68.625	0.3125	0.25	0.375
TCGA-BH-A0HF	CAVGMDSSYKLIF	Primary Tumor	TRA	13	0.384615	0.538462	0.153846	0.153846	0.0769231	0.0769231	0.153846	0.461538	1433.69	5.82794	0	5.33077	0.592308	0.299231	0.830769	0.153846	5.33077	0.214446	0.0259722	25.8	0.384615	0.230769	0.230769
TCGA-BH-A0HF	CAVGMDSSYKLIF	Primary Tumor	TRA	13	0.384615	0.538462	0.153846	0.153846	0.0769231	0.0769231	0.153846	0.461538	1433.69	5.82794	0	5.33077	0.592308	0.299231	0.830769	0.153846	5.33077	0.214446	0.0259722	25.8	0.384615	0.230769	0.230769
TCGA-BH-A0HF	CAMREGPGGGADGLTF	Primary Tumor	TRA	16	0.5625	0.6875	0.0625	0.1875	0.0625	0.125	0.25	0.75	1538.7	4.37018	-0.0625	4.425	0.491667	0.301875	-0.075	0.0625	4.425	0.086	0.0140325	17.1875	0.125	0.375	0.3125
TCGA-BH-A0HF	CAMREGPGGGADGLTF	Primary Tumor	TRA	16	0.5625	0.6875	0.0625	0.1875	0.0625	0.125	0.25	0.75	1538.7	4.37018	-0.0625	4.425	0.491667	0.301875	-0.075	0.0625	4.425	0.086	0.0140325	17.1875	0.125	0.375	0.3125
TCGA-AN-A0FN	CTTASWVTRSSASKIIF	Primary Tumor	TRA	17	0.588235	0.647059	0.117647	0.117647	0.117647	0	0.117647	0.647059	1858.12	9.50775	0.117647	4.94118	0.54902	0.32	0.441176	0.117647	4.94118	0.430754	0.00894641	50.7824	0.294118	0.235294	0.117647
TCGA-AN-A0FN	CAVNTGGFKTIF	Primary Tumor	TRA	12	0.5	0.666667	0.166667	0.0833333	0.0833333	0	0.0833333	0.5	1257.46	8.22223	0.0833333	5.25	0.583333	0.289167	0.75	0.166667	5.25	0.965909	0.00861111	-7.225	0.333333	0.25	0.0833333
TCGA-AN-A0FN	CAILNQAGTALIF	Primary Tumor	TRA	13	0.461538	0.538462	0.0769231	0	0	0	0	0.461538	1334.58	5.51813	0	5.97692	0.664103	0.310769	1.47692	0.0769231	5.97692	-1	0	11.7154	0.384615	0.153846	0.384615
TCGA-AN-A0FN	CALSEAKYNNNDMRF	Primary Tumor	TRA	15	0.266667	0.533333	0.133333	0.266667	0.133333	0.133333	0.266667	0.466667	1775.96	6.06183	0	3.60667	0.400741	0.314667	-0.893333	0.133333	3.60667	0.0626888	0.0150758	17.1467	0.2	0.266667	0.333333
TCGA-AN-A0FN	CAVRGGYQKVTF	Primary Tumor	TRA	12	0.416667	0.583333	0.166667	0.166667	0.166667	0	0.166667	0.583333	1328.54	9.31244	0.166667	4.56667	0.507407	0.3225	0.0666667	0.166667	4.56667	0.0470281	0.00253968	1.43333	0.333333	0.166667	0.0833333
TCGA-AN-A0FN	CAAPSGNTPLVF	Primary Tumor	TRA	12	0.5	0.833333	0.0833333	0	0	0	0.166667	0.583333	1176.34	5.51813	0	5.19167	0.576852	0.395833	0.691667	0.0833333	5.19167	0.0470281	0	27.1167	0.25	0.416667	0.25
TCGA-AN-A0FN	CAGDGSNYKLTF	Primary Tumor	TRA	12	0.5	0.666667	0.166667	0.166667	0.0833333	0.0833333	0.166667	0.583333	1275.39	5.82794	0	4.2	0.466667	0.269167	-0.3	0.166667	4.2	0.0470281	0.0319048	12.375	0.25	0.333333	0.166667
TCGA-AN-A0FN	CAVKFSGTYKYIF	Primary Tumor	TRA	13	0.384615	0.461538	0.307692	0.153846	0.153846	0	0.153846	0.461538	1526.8	9.11285	0.153846	4.98462	0.553846	0.311538	0.484615	0.307692	4.98462	0.0968171	0.00234385	0.484615	0.461538	0.153846	0.0769231
TCGA-AN-A0FN	CAVILSGSSNTGKLIF	Primary Tumor	TRA	16	0.5	0.625	0.0625	0.0625	0.0625	0	0.0625	0.5	1609.88	8.22223	0.0625	5.5375	0.615278	0.285625	1.0375	0.0625	5.5375	0.90155	0.00766888	12.225	0.375	0.375	0.1875
TCGA-AN-A0FN	CAPTPDTNAGKSTF	Primary Tumor	TRA	14	0.571429	0.857143	0.0714286	0.142857	0.0714286	0.0714286	0.285714	0.785714	1409.52	5.82867	0	3.89286	0.43254	0.401429	-0.607143	0.0714286	3.89286	0.0776093	0.0303457	-1.06429	0.0714286	0.357143	0.142857
TCGA-AN-A0FN	CAVRDETNAGKSTF	Primary Tumor	TRA	14	0.5	0.714286	0.0714286	0.285714	0.142857	0.142857	0.285714	0.714286	1498.62	6.06256	0	3.9	0.433333	0.320714	-0.6	0.0714286	3.9	0.0815991	0.030155	1.3	0.142857	0.214286	0.214286
TCGA-E9-A248	CVVSVSGGGADGLTF	Primary Tumor	TRA	15	0.6	0.866667	0.0666667	0.0666667	0	0.0666667	0.0666667	0.6	1368.51	3.79987	-0.0666667	5.57333	0.619259	0.254667	1.07333	0.0666667	5.57333	0.982605	0.00886364	17.6667	0.333333	0.4	0.133333
TCGA-E9-A248	CALDFIRDSNYQLIW	Primary Tumor	TRA	15	0.2	0.4	0.2	0.2	0.0666667	0.133333	0.2	0.4	1857.09	4.20782	-0.0666667	4.64667	0.516296	0.304667	0.146667	0.2	4.64667	0.469107	0.00690236	17.1467	0.466667	0.133333	0.2
TCGA-E9-A248	CAPNQGGKLIF	Primary Tumor	TRA	11	0.363636	0.545455	0.0909091	0.0909091	0.0909091	0	0.181818	0.545455	1147.35	8.22223	0.0909091	4.69091	0.521212	0.367273	0.190909	0.0909091	4.69091	0.0338702	0.00846167	15.5273	0.272727	0.363636	0.181818
TCGA-E9-A248	CAEIKETSGSRLTF	Primary Tumor	TRA	14	0.5	0.5	0.0714286	0.285714	0.142857	0.142857	0.285714	0.714286	1541.72	6.13605	0	4.25714	0.473016	0.317857	-0.242857	0.0714286	4.25714	0.0776093	0.0155885	39.55	0.214286	0.214286	0.285714
TCGA-E9-A248	CAEIKEPSGSRLTF	Primary Tumor	TRA	14	0.428571	0.5	0.0714286	0.285714	0.142857	0.142857	0.357143	0.714286	1537.74	6.13605	0	4.19286	0.465873	0.366429	-0.307143	0.0714286	4.19286	0.0696272	0.0155885	67.0643	0.214286	0.285714	0.285714
TCGA-E9-A248	CCERPPTNAGKSTF	Primary Tumor	TRA	14	0.5	0.714286	0.0714286	0.214286	0.142857	0.0714286	0.357143	0.714286	1510.69	8.05853	0.0714286	3.67143	0.407937	0.405714	-0.828571	0.0714286	3.67143	0.107737	0.0136974	28.8143	0.0714286	0.357143	0.142857
TCGA-E9-A248	CCERPPTNAGKSTF	Primary Tumor	TRA	14	0.5	0.714286	0.0714286	0.214286	0.142857	0.0714286	0.357143	0.714286	1510.69	8.05853	0.0714286	3.67143	0.407937	0.405714	-0.828571	0.0714286	3.67143	0.107737	0.0136974	28.8143	0.0714286	0.357143	0.142857
TCGA-E9-A248	CAETPILTGGGNKLTF	Primary Tumor	TRA	16	0.5	0.625	0.0625	0.125	0.0625	0.0625	0.1875	0.625	1621.85	5.99432	0	4.7125	0.523611	0.32875	0.2125	0.0625	4.7125	0.363231	0.0205051	43.4312	0.25	0.3125	0.25
TCGA-D8-A27E	CATGPTGANSKLTF	Primary Tumor	TRA	14	0.642857	0.785714	0.0714286	0.0714286	0.0714286	0	0.142857	0.714286	1367.53	8.22223	0.0714286	4.5	0.5	0.335	-6.34413e-17	0.0714286	4.5	0.115471	0.00826959	-6.15714	0.142857	0.357143	0.214286
TCGA-D8-A27E	CAVNPPRGNAGNNRKLIW	Primary Tumor	TRA	18	0.277778	0.666667	0.0555556	0.166667	0.166667	0	0.277778	0.5	1980.26	10.8604	0.166667	3.76667	0.418519	0.384444	-0.733333	0.0555556	3.76667	0.21431	0.0183944	-4.51111	0.222222	0.444444	0.166667
TCGA-D8-A27E	CAVNPPRGNAGNNRKLIW	Primary Tumor	TRA	18	0.277778	0.666667	0.0555556	0.166667	0.166667	0	0.277778	0.5	1980.26	10.8604	0.166667	3.76667	0.418519	0.384444	-0.733333	0.0555556	3.76667	0.21431	0.0183944	-4.51111	0.222222	0.444444	0.166667
TCGA-D8-A27E	CCESLLPYNQGGKLIF	Primary Tumor	TRA	16	0.3125	0.4375	0.125	0.125	0.0625	0.0625	0.1875	0.4375	1785.09	5.98663	0	4.8	0.533333	0.331875	0.3	0.125	4.8	0.0991682	0.0205051	25.8375	0.375	0.3125	0.25
TCGA-D8-A27E	CAVSQRAAGNKLTF	Primary Tumor	TRA	14	0.5	0.642857	0.0714286	0.142857	0.142857	0	0.142857	0.642857	1465.68	9.50775	0.142857	4.6	0.511111	0.327857	0.1	0.0714286	4.6	0.156361	0.00475737	36.6429	0.214286	0.214286	0.285714
TCGA-D8-A27E	CAVSQRAAGNKLTF	Primary Tumor	TRA	14	0.5	0.642857	0.0714286	0.142857	0.142857	0	0.142857	0.642857	1465.68	9.50775	0.142857	4.6	0.511111	0.327857	0.1	0.0714286	4.6	0.156361	0.00475737	36.6429	0.214286	0.214286	0.285714
TCGA-D8-A27E	CAVSQRAAGNKLTF	Primary Tumor	TRA	14	0.5	0.642857	0.0714286	0.142857	0.142857	0	0.142857	0.642857	1465.68	9.50775	0.142857	4.6	0.511111	0.327857	0.1	0.0714286	4.6	0.156361	0.00475737	36.6429	0.214286	0.214286	0.285714
TCGA-BH-A0DQ	CREYNTGGFKTIF	Primary Tumor	TRA	13	0.384615	0.461538	0.230769	0.230769	0.153846	0.0769231	0.230769	0.538462	1535.72	8.19757	0.0769231	4.01538	0.446154	0.289231	-0.484615	0.230769	4.01538	0.314113	0.0149292	-5.9	0.307692	0.230769	0.0769231
TCGA-BH-A0DQ	CAYSAFTSGTSKYIF	Primary Tumor	TRA	15	0.6	0.6	0.266667	0.0666667	0.0666667	0	0.0666667	0.6	1645.83	8.17523	0.0666667	4.86667	0.540741	0.284667	0.366667	0.266667	4.86667	0.920366	0.0079798	3.67333	0.333333	0.266667	0.133333
TCGA-E2-A14N	CAVNSAVSASKIIF	Primary Tumor	TRA	14	0.5	0.714286	0.0714286	0.0714286	0.0714286	0	0.0714286	0.5	1409.65	8.22223	0.0714286	5.80714	0.645238	0.331429	1.30714	0.0714286	5.80714	0.945517	0.00826959	3.22143	0.357143	0.285714	0.214286
TCGA-E2-A14N	CVVSALTGGGNKLTF	Primary Tumor	TRA	15	0.533333	0.733333	0.0666667	0.0666667	0.0666667	0	0.0666667	0.533333	1466.7	8.22223	0.0666667	5.32	0.591111	0.276667	0.82	0.0666667	5.32	0.920366	0.0079798	27.7933	0.333333	0.333333	0.2
TCGA-E2-A14N	CAVVRRDSSYKLIF	Primary Tumor	TRA	14	0.285714	0.5	0.142857	0.285714	0.214286	0.0714286	0.285714	0.5	1656.95	9.31073	0.142857	4.82143	0.535714	0.325	0.321429	0.142857	4.82143	0.0754794	0.0143897	71.65	0.428571	0.142857	0.142857
TCGA-E2-A14N	CLLLCRESPSYDKVIF	Primary Tumor	TRA	16	0.25	0.4375	0.125	0.25	0.125	0.125	0.3125	0.4375	1886.24	6.05499	0	5	0.555556	0.3475	0.5	0.125	5	0.101217	0.0113131	77.1375	0.4375	0.1875	0.25
TCGA-E2-A14N	CALSWDTGRRALTF	Primary Tumor	TRA	14	0.5	0.571429	0.142857	0.214286	0.142857	0.0714286	0.214286	0.642857	1596.81	8.24957	0.0714286	4.53571	0.503968	0.282857	0.0357143	0.142857	4.53571	0.207356	0.0470974	42.2143	0.285714	0.142857	0.285714
TCGA-E2-A14N	CSPINAGNMLTF	Primary Tumor	TRA	12	0.416667	0.666667	0.0833333	0	0	0	0.0833333	0.416667	1267.47	5.51813	0	5.06667	0.562963	0.334167	0.566667	0.0833333	5.06667	0.977273	0	48.9917	0.25	0.416667	0.25
TCGA-E2-A14N	CALSWDTGRRALTF	Primary Tumor	TRA	14	0.5	0.571429	0.142857	0.214286	0.142857	0.0714286	0.214286	0.642857	1596.81	8.24957	0.0714286	4.53571	0.503968	0.282857	0.0357143	0.142857	4.53571	0.207356	0.0470974	42.2143	0.285714	0.142857	0.285714
TCGA-E2-A14N	CALSWDTGRRALTF	Primary Tumor	TRA	14	0.5	0.571429	0.142857	0.214286	0.142857	0.0714286	0.214286	0.642857	1596.81	8.24957	0.0714286	4.53571	0.503968	0.282857	0.0357143	0.142857	4.53571	0.207356	0.0470974	42.2143	0.285714	0.142857	0.285714
TCGA-E2-A14N	CRSKGATNKLIF	Primary Tumor	TRA	12	0.416667	0.5	0.0833333	0.25	0.25	0	0.25	0.583333	1337.59	10.062	0.25	4.30833	0.478704	0.323333	-0.191667	0.0833333	4.30833	0.0711232	0.00722222	31.7667	0.25	0.25	0.166667
TCGA-E2-A14N	CRREAGNTGKLIF	Primary Tumor	TRA	13	0.384615	0.461538	0.0769231	0.307692	0.230769	0.0769231	0.307692	0.615385	1464.69	9.50409	0.153846	4.03846	0.448718	0.308462	-0.461538	0.0769231	4.03846	0.214537	0.00782065	20.6385	0.230769	0.230769	0.230769
TCGA-E2-A14N	CRREAGNTGKLIF	Primary Tumor	TRA	13	0.384615	0.461538	0.0769231	0.307692	0.230769	0.0769231	0.307692	0.615385	1464.69	9.50409	0.153846	4.03846	0.448718	0.308462	-0.461538	0.0769231	4.03846	0.214537	0.00782065	20.6385	0.230769	0.230769	0.230769
TCGA-E2-A14N	CAASAFGRGSQGNLIF	Primary Tumor	TRA	16	0.5625	0.625	0.125	0.0625	0.0625	0	0.0625	0.625	1598.78	8.24969	0.0625	4.96875	0.552083	0.27375	0.46875	0.125	4.96875	1	0.00892519	10.8	0.25	0.375	0.25
TCGA-E2-A14N	CIPQGTSYDKVIF	Primary Tumor	TRA	13	0.307692	0.538462	0.153846	0.153846	0.0769231	0.0769231	0.230769	0.538462	1470.69	5.82794	0	4.71538	0.523932	0.378462	0.215385	0.153846	4.71538	0.166715	0.00395833	20.4538	0.384615	0.230769	0
TCGA-E2-A14N	CAGQRGQNFVF	Primary Tumor	TRA	11	0.363636	0.545455	0.181818	0.0909091	0.0909091	0	0.0909091	0.545455	1226.36	8.24969	0.0909091	4.34545	0.482828	0.301818	-0.154545	0.181818	4.34545	0.773514	0.00851098	-12.2909	0.272727	0.272727	0.0909091
TCGA-E2-A14N	CAGRDDYKLSF	Primary Tumor	TRA	11	0.363636	0.545455	0.181818	0.363636	0.181818	0.181818	0.363636	0.636364	1274.4	5.9527	0	3.86364	0.429293	0.29	-0.636364	0.181818	3.86364	0.039384	0.00458113	1.37273	0.272727	0.181818	0.181818
TCGA-E2-A14N	CAVDTIWETSGSRLTF	Primary Tumor	TRA	16	0.5	0.625	0.125	0.1875	0.0625	0.125	0.1875	0.625	1785.97	4.37018	-0.0625	4.69375	0.521528	0.295625	0.19375	0.125	4.69375	0.0584695	0.0373343	10.3375	0.3125	0.1875	0.1875
TCGA-E2-A14N	CVVRLQTGANNLFF	Primary Tumor	TRA	14	0.285714	0.571429	0.142857	0.0714286	0.0714286	0	0.0714286	0.357143	1581.84	8.24969	0.0714286	5.2	0.577778	0.294286	0.7	0.142857	5.2	0.945517	0.00826959	15.0571	0.428571	0.214286	0.214286
TCGA-E2-A14N	CAVSPSRAGANNLFF	Primary Tumor	TRA	15	0.466667	0.733333	0.133333	0.0666667	0.0666667	0	0.133333	0.533333	1553.74	8.24969	0.0666667	4.92667	0.547407	0.324	0.426667	0.133333	4.92667	0.759323	0.00914141	58.6467	0.266667	0.4	0.266667
TCGA-E2-A14N	CAVSPSRAGANNLFF	Primary Tumor	TRA	15	0.466667	0.733333	0.133333	0.0666667	0.0666667	0	0.133333	0.533333	1553.74	8.24969	0.0666667	4.92667	0.547407	0.324	0.426667	0.133333	4.92667	0.759323	0.00914141	58.6467	0.266667	0.4	0.266667
TCGA-E2-A14N	CCSLPHTGDTDKLIF	Primary Tumor	TRA	15	0.4	0.6	0.133333	0.2	0.0666667	0.133333	0.266667	0.6	1649.89	5.21039	-0.0666667	4.60667	0.511852	0.327333	0.106667	0.0666667	4.60667	0.0779176	0.0168659	-9.85333	0.266667	0.2	0.133333
TCGA-E2-A14N	CCSLPHTGDTDKLIF	Primary Tumor	TRA	15	0.4	0.6	0.133333	0.2	0.0666667	0.133333	0.266667	0.6	1649.89	5.21039	-0.0666667	4.60667	0.511852	0.327333	0.106667	0.0666667	4.60667	0.0779176	0.0168659	-9.85333	0.266667	0.2	0.133333
TCGA-E2-A14N	CAVMDSNYQLIW	Primary Tumor	TRA	12	0.25	0.5	0.166667	0.0833333	0	0.0833333	0.0833333	0.333333	1442.66	3.79987	-0.0833333	4.93333	0.548148	0.32	0.433333	0.166667	4.93333	0.954546	0.00902778	25.2167	0.416667	0.166667	0.25
TCGA-E2-A14N	CAGAGNTPLVF	Primary Tumor	TRA	11	0.545455	0.818182	0.0909091	0	0	0	0.0909091	0.545455	1049.2	5.51813	0	5.43636	0.60404	0.330909	0.936364	0.0909091	5.43636	0.830136	0	-14.0636	0.272727	0.363636	0.272727
TCGA-E2-A14N	CAASAFRGYGQNFVF	Primary Tumor	TRA	15	0.466667	0.6	0.266667	0.0666667	0.0666667	0	0.0666667	0.533333	1637.81	8.22198	0.0666667	4.90667	0.545185	0.279333	0.406667	0.266667	4.90667	1	0.00914141	-17.6667	0.333333	0.266667	0.2
TCGA-E2-A14N	CAASAFRGYGQNFVF	Primary Tumor	TRA	15	0.466667	0.6	0.266667	0.0666667	0.0666667	0	0.0666667	0.533333	1637.81	8.22198	0.0666667	4.90667	0.545185	0.279333	0.406667	0.266667	4.90667	1	0.00914141	-17.6667	0.333333	0.266667	0.2
TCGA-E2-A14N	CALSGRNQGGKLIF	Primary Tumor	TRA	14	0.428571	0.5	0.0714286	0.142857	0.142857	0	0.142857	0.571429	1463.7	9.50775	0.142857	4.62857	0.514286	0.287857	0.128571	0.0714286	4.62857	0.156361	0.00475737	9.4	0.285714	0.357143	0.214286
TCGA-E2-A14N	CVVRARDNFNKFYF	Primary Tumor	TRA	14	0.142857	0.5	0.285714	0.285714	0.214286	0.0714286	0.285714	0.357143	1779.03	9.31073	0.142857	4.24286	0.471429	0.308571	-0.257143	0.285714	4.24286	0.0714896	0.0149131	33.365	0.428571	0.142857	0.0714286
TCGA-E2-A14N	CVVNSRGFQKLVF	Primary Tumor	TRA	13	0.230769	0.538462	0.153846	0.153846	0.153846	0	0.153846	0.384615	1496.77	9.50775	0.153846	5.10769	0.567521	0.316154	0.607692	0.153846	5.10769	0.214446	0.00959813	5.18462	0.461538	0.230769	0.0769231
TCGA-E2-A14N	CAVVLTGRRALTF	Primary Tumor	TRA	13	0.461538	0.615385	0.0769231	0.153846	0.153846	0	0.153846	0.538462	1406.7	10.3519	0.153846	5.58462	0.620513	0.303846	1.08462	0.0769231	5.58462	0.730628	0.0306825	56.2538	0.384615	0.0769231	0.307692
TCGA-E2-A14N	CAVVLTGRRALTF	Primary Tumor	TRA	13	0.461538	0.615385	0.0769231	0.153846	0.153846	0	0.153846	0.538462	1406.7	10.3519	0.153846	5.58462	0.620513	0.303846	1.08462	0.0769231	5.58462	0.730628	0.0306825	56.2538	0.384615	0.0769231	0.307692
TCGA-A8-A099	CIVTLNLIQGAQKLVF	Primary Tumor	TRA	16	0.25	0.4375	0.0625	0.0625	0.0625	0	0.0625	0.375	1760.15	8.22223	0.0625	5.775	0.641667	0.338125	1.275	0.0625	5.775	0.90155	0.00766888	-11.85	0.5	0.125	0.25
TCGA-A8-A099	CIVTLNLIQGAQKLVF	Primary Tumor	TRA	16	0.25	0.4375	0.0625	0.0625	0.0625	0	0.0625	0.375	1760.15	8.22223	0.0625	5.775	0.641667	0.338125	1.275	0.0625	5.775	0.90155	0.00766888	-11.85	0.5	0.125	0.25
TCGA-GM-A2DN	CAGHSSGTYKYIF	Primary Tumor	TRA	13	0.538462	0.538462	0.307692	0.0769231	0.0769231	0	0.0769231	0.615385	1433.59	8.18414	0.0769231	4.40769	0.489744	0.269231	-0.0923077	0.230769	4.40769	0.976728	0.00850263	17.5154	0.307692	0.307692	0.0769231
TCGA-GM-A2DN	CAVPPSGTYKYIF	Primary Tumor	TRA	13	0.384615	0.615385	0.230769	0.0769231	0.0769231	0	0.230769	0.538462	1445.68	8.17523	0.0769231	4.82308	0.535897	0.409231	0.323077	0.230769	4.82308	0.0869945	0.00850263	47.1462	0.384615	0.307692	0.0769231
TCGA-GM-A2DN	CAGQFTSGTYKYIF	Primary Tumor	TRA	14	0.5	0.5	0.285714	0.0714286	0.0714286	0	0.0714286	0.571429	1585.78	8.17523	0.0714286	4.6	0.511111	0.291429	0.1	0.285714	4.6	0.945517	0.00826959	-2.16429	0.357143	0.214286	0.0714286
TCGA-GM-A2DN	CAGQFTSGTYKYIF	Primary Tumor	TRA	14	0.5	0.5	0.285714	0.0714286	0.0714286	0	0.0714286	0.571429	1585.78	8.17523	0.0714286	4.6	0.511111	0.291429	0.1	0.285714	4.6	0.945517	0.00826959	-2.16429	0.357143	0.214286	0.0714286
TCGA-GM-A2DN	CAGQFTSGTYKYIF	Primary Tumor	TRA	14	0.5	0.5	0.285714	0.0714286	0.0714286	0	0.0714286	0.571429	1585.78	8.17523	0.0714286	4.6	0.511111	0.291429	0.1	0.285714	4.6	0.945517	0.00826959	-2.16429	0.357143	0.214286	0.0714286
TCGA-GM-A2DN	CCVLLHRQNAGNNRKLIW	Primary Tumor	TRA	18	0.222222	0.444444	0.111111	0.166667	0.166667	0	0.166667	0.388889	2138.52	9.69611	0.166667	4.25	0.472222	0.311667	-0.25	0.0555556	4.25	0.41636	0.0183944	6.52222	0.333333	0.222222	0.222222
TCGA-GM-A2DN	CFAVGGSSNTGKLIF	Primary Tumor	TRA	15	0.533333	0.666667	0.133333	0.0666667	0.0666667	0	0.0666667	0.533333	1500.72	8.22223	0.0666667	5.26667	0.585185	0.266667	0.766667	0.133333	5.26667	0.920366	0.0079798	2.1	0.333333	0.4	0.133333
TCGA-GM-A2DN	CVVNGPPGSARQLTF	Primary Tumor	TRA	15	0.4	0.733333	0.0666667	0.0666667	0.0666667	0	0.2	0.6	1545.76	8.24969	0.0666667	4.65333	0.517037	0.387333	0.153333	0.0666667	4.65333	0.209545	0.00886364	28.1933	0.266667	0.4	0.133333
TCGA-GM-A2DN	CAMSRGSYIPTF	Primary Tumor	TRA	12	0.5	0.583333	0.166667	0.0833333	0.0833333	0	0.166667	0.583333	1332.55	8.22198	0.0833333	4.78333	0.531481	0.341667	0.283333	0.166667	4.78333	0.0470281	0.00902778	62.6417	0.25	0.333333	0.166667
TCGA-GM-A2DN	CAMSRGSYIPTF	Primary Tumor	TRA	12	0.5	0.583333	0.166667	0.0833333	0.0833333	0	0.166667	0.583333	1332.55	8.22198	0.0833333	4.78333	0.531481	0.341667	0.283333	0.166667	4.78333	0.0470281	0.00902778	62.6417	0.25	0.333333	0.166667
TCGA-GM-A2DN	CAMSRGSYIPTF	Primary Tumor	TRA	12	0.5	0.583333	0.166667	0.0833333	0.0833333	0	0.166667	0.583333	1332.55	8.22198	0.0833333	4.78333	0.531481	0.341667	0.283333	0.166667	4.78333	0.0470281	0.00902778	62.6417	0.25	0.333333	0.166667
TCGA-GM-A2DN	CAFISGGYNKLIF	Primary Tumor	TRA	13	0.384615	0.461538	0.230769	0.0769231	0.0769231	0	0.0769231	0.384615	1432.68	8.19745	0.0769231	5.45385	0.605983	0.273846	0.953846	0.230769	5.45385	0.976728	0.00850263	23.8769	0.461538	0.307692	0.153846
TCGA-BH-A201	CAVSEMNTGFRKLVF	Primary Tumor	TRA	15	0.333333	0.533333	0.133333	0.2	0.133333	0.0666667	0.2	0.466667	1702.01	8.22223	0.0666667	4.94667	0.54963	0.310667	0.446667	0.133333	4.94667	0.166153	0.0602076	5.19333	0.333333	0.2	0.266667
TCGA-BH-A201	CAVDNNNDMRF	Primary Tumor	TRA	11	0.181818	0.727273	0.0909091	0.272727	0.0909091	0.181818	0.272727	0.363636	1298.41	4.20782	-0.0909091	3.7	0.411111	0.302727	-0.8	0.0909091	3.7	0.0714377	0.0366783	-11.4273	0.181818	0.272727	0.181818
TCGA-BH-A201	CAATTGSARQLTF	Primary Tumor	TRA	13	0.692308	0.692308	0.0769231	0.0769231	0.0769231	0	0.0769231	0.769231	1326.48	8.24969	0.0769231	4.74615	0.52735	0.308462	0.246154	0.0769231	4.74615	1	0.009149	27.0077	0.153846	0.153846	0.307692
TCGA-B6-A1KI	CCGNNNARLIF	Primary Tumor	TRA	11	0.363636	0.636364	0.0909091	0.0909091	0.0909091	0	0.0909091	0.272727	1224.41	8.07208	0.0909091	4.72727	0.525253	0.271818	0.227273	0.0909091	4.72727	0.830136	0.00846167	1.37273	0.272727	0.363636	0.181818
TCGA-B6-A1KI	CAVGDRDDKIIF	Primary Tumor	TRA	12	0.25	0.583333	0.0833333	0.416667	0.166667	0.25	0.416667	0.583333	1351.53	4.42889	-0.0833333	4.58333	0.509259	0.3275	0.0833333	0.0833333	4.58333	0.258414	0.00650256	-18.3417	0.333333	0.0833333	0.0833333
TCGA-C8-A26W	CAASNYGQNFVF	Primary Tumor	TRA	12	0.416667	0.666667	0.25	0	0	0	0	0.416667	1320.43	5.5174	0	4.74167	0.526852	0.284167	0.241667	0.25	4.74167	-1	0	-10.4333	0.333333	0.333333	0.166667
TCGA-C8-A26W	CAVTSGTYKYIF	Primary Tumor	TRA	12	0.5	0.583333	0.25	0.0833333	0.0833333	0	0.0833333	0.5	1352.55	8.17523	0.0833333	5.05833	0.562037	0.303333	0.558333	0.25	5.05833	0.965909	0.00861111	-4.98333	0.416667	0.166667	0.0833333
TCGA-C8-A26W	CAGANSNSGYALNF	Primary Tumor	TRA	14	0.571429	0.785714	0.142857	0	0	0	0	0.5	1388.46	5.5174	0	4.52143	0.502381	0.255	0.0214286	0.142857	4.52143	-1	0	3.33571	0.214286	0.5	0.285714
TCGA-C8-A26W	CISVLVIIQGAQKLVF	Primary Tumor	TRA	16	0.25	0.4375	0.0625	0.0625	0.0625	0	0.0625	0.375	1731.15	8.22223	0.0625	6.29375	0.699306	0.35	1.79375	0.0625	6.29375	0.90155	0.00766888	-1.2375	0.5625	0.125	0.1875
TCGA-C8-A26W	CAGQSGGGADGLTF	Primary Tumor	TRA	14	0.714286	0.785714	0.0714286	0.0714286	0	0.0714286	0.0714286	0.785714	1240.3	3.79987	-0.0714286	4.65714	0.51746	0.245714	0.157143	0.0714286	4.65714	0.991678	0.00906148	54.9857	0.142857	0.428571	0.214286
TCGA-C8-A26W	CAGQSGGGADGLTF	Primary Tumor	TRA	14	0.714286	0.785714	0.0714286	0.0714286	0	0.0714286	0.0714286	0.785714	1240.3	3.79987	-0.0714286	4.65714	0.51746	0.245714	0.157143	0.0714286	4.65714	0.991678	0.00906148	54.9857	0.142857	0.428571	0.214286
TCGA-C8-A26W	CAETPAEGGSYIPTF	Primary Tumor	TRA	15	0.533333	0.666667	0.133333	0.133333	0	0.133333	0.266667	0.733333	1542.66	3.79498	-0.133333	4.42667	0.491852	0.385333	-0.0733333	0.133333	4.42667	0.151364	0.0146212	36.7067	0.2	0.333333	0.266667
TCGA-BH-A1FC	CSKLLDNYGQNFVF	Primary Tumor	TRA	14	0.214286	0.5	0.214286	0.142857	0.0714286	0.0714286	0.142857	0.357143	1647.85	5.82794	0	4.46429	0.496032	0.286429	-0.0357143	0.214286	4.46429	0.673795	0.0126296	-13.5786	0.428571	0.285714	0.142857
TCGA-BH-A1FC	CCGNANFGNEKLTF	Primary Tumor	TRA	14	0.428571	0.642857	0.142857	0.142857	0.0714286	0.0714286	0.142857	0.428571	1517.68	5.98737	0	4.27143	0.474603	0.272857	-0.228571	0.142857	4.27143	0.922771	0.00354321	-10.8286	0.214286	0.357143	0.214286
TCGA-BH-A1FC	CAVERTYKYIF	Primary Tumor	TRA	11	0.272727	0.363636	0.272727	0.272727	0.181818	0.0909091	0.272727	0.454545	1392.62	8.17523	0.0909091	4.55455	0.506061	0.340909	0.0545455	0.272727	4.55455	0.0778188	0.0236288	9.09091	0.454545	0	0.181818
TCGA-BH-A1FC	CAVDGIDRDDKIIF	Primary Tumor	TRA	14	0.214286	0.571429	0.0714286	0.428571	0.142857	0.285714	0.428571	0.571429	1579.77	4.1391	-0.142857	4.64286	0.515873	0.33	0.142857	0.0714286	4.64286	0.192992	0.0170285	-25.0286	0.357143	0.0714286	0.0714286
TCGA-BH-A1FC	CTSGGYQKVTF	Primary Tumor	TRA	11	0.545455	0.636364	0.181818	0.0909091	0.0909091	0	0.0909091	0.636364	1190.33	8.19745	0.0909091	4.3	0.477778	0.299091	-0.2	0.181818	4.3	0.830136	0.00846167	38.0091	0.272727	0.272727	0
TCGA-AO-A0JI	CLLLCSKLYSGGGAGGLTF	Primary Tumor	TRA	19	0.578947	0.578947	0.105263	0.0526316	0.0526316	0	0.0526316	0.526316	1860.2	8.04535	0.0526316	5.50526	0.611696	0.236842	1.00526	0.105263	5.50526	1	0.00812096	36.6526	0.368421	0.368421	0.315789
TCGA-AO-A0JI	CLLLCSQLYSGGGADGLTF	Primary Tumor	TRA	19	0.526316	0.578947	0.105263	0.0526316	0	0.0526316	0.0526316	0.526316	1918.19	3.79974	-0.0526316	5.36316	0.595906	0.244211	0.863158	0.105263	5.36316	0.96306	0.00775546	40.2947	0.368421	0.315789	0.315789
TCGA-AO-A0JI	CLLLCSKLYSGGGADGLTF	Primary Tumor	TRA	19	0.526316	0.578947	0.105263	0.105263	0.0526316	0.0526316	0.105263	0.526316	1918.24	5.82123	0	5.34211	0.593567	0.245789	0.842105	0.105263	5.34211	0.411544	0.024246	25.6895	0.368421	0.315789	0.315789
TCGA-AO-A0JI	CTSVLWKLSGAGSYQLTF	Primary Tumor	TRA	18	0.5	0.555556	0.166667	0.0555556	0.0555556	0	0.0555556	0.555556	1961.24	8.19745	0.0555556	4.97222	0.552469	0.283889	0.472222	0.166667	4.97222	1	0.00839778	38.1333	0.388889	0.277778	0.222222
TCGA-AO-A0JI	CTSVLWKLSGAGSYQLTF	Primary Tumor	TRA	18	0.5	0.555556	0.166667	0.0555556	0.0555556	0	0.0555556	0.555556	1961.24	8.19745	0.0555556	4.97222	0.552469	0.283889	0.472222	0.166667	4.97222	1	0.00839778	38.1333	0.388889	0.277778	0.222222
TCGA-AO-A0JI	CVVHNNNDMRF	Primary Tumor	TRA	11	0.0909091	0.636364	0.181818	0.181818	0.0909091	0.0909091	0.181818	0.272727	1348.51	6.73529	0	3.94545	0.438384	0.295455	-0.554545	0.0909091	3.94545	0.645799	0.0103439	16.9091	0.272727	0.272727	0.0909091
TCGA-C8-A12N	CALSELGNTGKLIF	Primary Tumor	TRA	14	0.428571	0.5	0.0714286	0.142857	0.0714286	0.0714286	0.142857	0.5	1465.71	5.99432	0	5.2	0.577778	0.283571	0.7	0.0714286	5.2	0.115471	0.0318889	-7.27857	0.357143	0.285714	0.357143
TCGA-C8-A1HN	CLVGGNYGGSQGNLIF	Primary Tumor	TRA	16	0.4375	0.625	0.125	0	0	0	0	0.4375	1598.78	5.5174	0	4.9375	0.548611	0.243125	0.4375	0.125	4.9375	-1	0	27.65	0.375	0.5	0.125
TCGA-C8-A1HN	CAVRPNSGGGADGLTF	Primary Tumor	TRA	16	0.5625	0.8125	0.0625	0.125	0.0625	0.0625	0.1875	0.6875	1521.65	5.82941	0	4.54375	0.504861	0.30125	0.04375	0.0625	4.54375	0.283018	0.0263636	33.9375	0.1875	0.4375	0.1875
TCGA-A2-A25B	CTNFGNEKLTF	Primary Tumor	TRA	11	0.363636	0.545455	0.181818	0.181818	0.0909091	0.0909091	0.181818	0.454545	1273.41	5.99432	0	4.10909	0.456566	0.283636	-0.390909	0.181818	4.10909	0.562986	0.00517196	7.18182	0.272727	0.272727	0.181818
TCGA-BH-A203	CAVNTGSQGNLIF	Primary Tumor	TRA	13	0.461538	0.692308	0.0769231	0	0	0	0	0.461538	1323.47	5.51813	0	5.02308	0.55812	0.284615	0.523077	0.0769231	5.02308	-1	0	4.45385	0.307692	0.384615	0.153846
TCGA-AN-A0AL	CAVGRTGGGNKLTF	Primary Tumor	TRA	14	0.571429	0.714286	0.0714286	0.142857	0.142857	0	0.142857	0.642857	1380.57	9.50775	0.142857	4.51429	0.501587	0.270714	0.0142857	0.0714286	4.51429	0.115471	0.00277324	28.3857	0.214286	0.357143	0.142857
TCGA-AN-A0AL	CAMLNAGNNRKLIW	Primary Tumor	TRA	14	0.285714	0.5	0.0714286	0.142857	0.142857	0	0.142857	0.357143	1603.91	9.50775	0.142857	4.49286	0.499206	0.310714	-0.00714286	0.0714286	4.49286	0.922771	0.0311189	-2.84286	0.285714	0.285714	0.357143
TCGA-AN-A0AL	CAFNAGNNRKLIW	Primary Tumor	TRA	13	0.307692	0.538462	0.153846	0.153846	0.153846	0	0.153846	0.384615	1506.73	9.50775	0.153846	4.26923	0.474359	0.301538	-0.230769	0.153846	4.26923	0.830755	0.0313449	-3.83077	0.307692	0.307692	0.230769
TCGA-AR-A2LQ	CAVRDDDYKLSF	Primary Tumor	TRA	12	0.25	0.583333	0.166667	0.416667	0.166667	0.25	0.416667	0.583333	1431.57	4.42889	-0.0833333	4.00833	0.44537	0.3125	-0.491667	0.166667	4.00833	0.102495	0.0138272	2.09167	0.333333	0.0833333	0.166667
TCGA-AR-A2LQ	CAVRDDDYKLSF	Primary Tumor	TRA	12	0.25	0.583333	0.166667	0.416667	0.166667	0.25	0.416667	0.583333	1431.57	4.42889	-0.0833333	4.00833	0.44537	0.3125	-0.491667	0.166667	4.00833	0.102495	0.0138272	2.09167	0.333333	0.0833333	0.166667
TCGA-AR-A2LQ	CAVRDDDYKLSF	Primary Tumor	TRA	12	0.25	0.583333	0.166667	0.416667	0.166667	0.25	0.416667	0.583333	1431.57	4.42889	-0.0833333	4.00833	0.44537	0.3125	-0.491667	0.166667	4.00833	0.102495	0.0138272	2.09167	0.333333	0.0833333	0.166667
TCGA-AR-A2LQ	CAVRDDDYKLSF	Primary Tumor	TRA	12	0.25	0.583333	0.166667	0.416667	0.166667	0.25	0.416667	0.583333	1431.57	4.42889	-0.0833333	4.00833	0.44537	0.3125	-0.491667	0.166667	4.00833	0.102495	0.0138272	2.09167	0.333333	0.0833333	0.166667
TCGA-AR-A2LQ	CAVRDDDYKLSF	Primary Tumor	TRA	12	0.25	0.583333	0.166667	0.416667	0.166667	0.25	0.416667	0.583333	1431.57	4.42889	-0.0833333	4.00833	0.44537	0.3125	-0.491667	0.166667	4.00833	0.102495	0.0138272	2.09167	0.333333	0.0833333	0.166667
TCGA-AR-A2LQ	CTIASSESSNAGKSTF	Primary Tumor	TRA	16	0.6875	0.75	0.0625	0.125	0.0625	0.0625	0.125	0.75	1589.68	5.99432	0	4.29375	0.477083	0.298125	-0.20625	0.0625	4.29375	0.281667	0.0276263	80.3063	0.125	0.4375	0.1875
TCGA-AR-A2LQ	CTIASSESSNAGKSTF	Primary Tumor	TRA	16	0.6875	0.75	0.0625	0.125	0.0625	0.0625	0.125	0.75	1589.68	5.99432	0	4.29375	0.477083	0.298125	-0.20625	0.0625	4.29375	0.281667	0.0276263	80.3063	0.125	0.4375	0.1875
TCGA-AR-A2LQ	CCVLLHRQSPPRQANHT	Primary Tumor	TRA	17	0.294118	0.529412	0.117647	0.117647	0.117647	0	0.235294	0.647059	1960.25	9.02496	0.117647	3.79412	0.421569	0.399412	-0.705882	0	3.79412	0.321198	0.00772176	81.7882	0.176471	0.235294	0.176471
TCGA-AR-A2LQ	CTIASSESSNAGKSTF	Primary Tumor	TRA	16	0.6875	0.75	0.0625	0.125	0.0625	0.0625	0.125	0.75	1589.68	5.99432	0	4.29375	0.477083	0.298125	-0.20625	0.0625	4.29375	0.281667	0.0276263	80.3063	0.125	0.4375	0.1875
TCGA-AR-A2LQ	CTIASSESSNAGKSTF	Primary Tumor	TRA	16	0.6875	0.75	0.0625	0.125	0.0625	0.0625	0.125	0.75	1589.68	5.99432	0	4.29375	0.477083	0.298125	-0.20625	0.0625	4.29375	0.281667	0.0276263	80.3063	0.125	0.4375	0.1875
TCGA-A2-A04N	CAGKSSGDRLTF	Primary Tumor	TRA	12	0.583333	0.666667	0.0833333	0.25	0.166667	0.0833333	0.25	0.75	1241.37	8.22211	0.0833333	4.15833	0.462037	0.2775	-0.341667	0.0833333	4.15833	0.0894573	0.00883377	22.1417	0.166667	0.333333	0.166667
TCGA-A8-A0A6	CAASSNQGGKLIF	Primary Tumor	TRA	13	0.538462	0.615385	0.0769231	0.0769231	0.0769231	0	0.0769231	0.615385	1295.46	8.22223	0.0769231	4.8	0.533333	0.299231	0.3	0.0769231	4.8	0.976728	0.00850263	14.6769	0.230769	0.384615	0.230769
TCGA-A8-A0A6	CAYRSASGNQFYF	Primary Tumor	TRA	13	0.461538	0.538462	0.307692	0.0769231	0.0769231	0	0.0769231	0.538462	1513.63	8.19733	0.0769231	4.16154	0.462393	0.278462	-0.338462	0.307692	4.16154	0.976728	0.00850263	36.97	0.307692	0.307692	0.153846
TCGA-A8-A0A6	CAYRSASGNQFYF	Primary Tumor	TRA	13	0.461538	0.538462	0.307692	0.0769231	0.0769231	0	0.0769231	0.538462	1513.63	8.19733	0.0769231	4.16154	0.462393	0.278462	-0.338462	0.307692	4.16154	0.976728	0.00850263	36.97	0.307692	0.307692	0.153846
TCGA-A8-A0A6	CRLHLCCLGSNSGYALNF	Primary Tumor	TRA	18	0.444444	0.555556	0.166667	0.0555556	0.0555556	0	0.0555556	0.388889	1971.29	7.96783	0.0555556	4.99444	0.554938	0.242222	0.494444	0.111111	4.99444	0.69168	0.00506851	20.2333	0.333333	0.333333	0.277778
TCGA-A8-A0A6	CILRSAGGTSYGKLTF	Primary Tumor	TRA	16	0.5625	0.5625	0.125	0.125	0.125	0	0.125	0.625	1673.93	9.31244	0.125	4.83125	0.536806	0.2725	0.33125	0.125	4.83125	0.39778	0.00724116	55.1125	0.3125	0.3125	0.1875
TCGA-A8-A0A6	CSRRSGTASKLTF	Primary Tumor	TRA	13	0.615385	0.615385	0.0769231	0.230769	0.230769	0	0.230769	0.769231	1413.6	10.8604	0.230769	4.02308	0.447009	0.295385	-0.476923	0.0769231	4.02308	0.155869	0.0112512	98.3385	0.153846	0.307692	0.153846
TCGA-A8-A0A6	CCLGSNSGYALNF	Primary Tumor	TRA	13	0.538462	0.692308	0.153846	0	0	0	0	0.384615	1348.5	5.5108	0	5	0.555556	0.234615	0.5	0.153846	5	-1	0	24.1692	0.307692	0.461538	0.230769
TCGA-E2-A158	CAVTRGGATNKLIF	Primary Tumor	TRA	14	0.5	0.642857	0.0714286	0.142857	0.142857	0	0.142857	0.571429	1450.7	9.50775	0.142857	5.02143	0.557937	0.306429	0.521429	0.0714286	5.02143	0.115471	0.00277324	0.0214286	0.285714	0.214286	0.214286
TCGA-E2-A158	CDVFLRLMRF	Primary Tumor	TRA	10	0.1	0.3	0.2	0.3	0.2	0.1	0.3	0.3	1299.61	8.24957	0.1	5.43	0.603333	0.288	0.93	0.2	5.43	0.0677761	0.0494444	39.98	0.5	0	0.3
TCGA-E2-A158	CGEHHRDAGGTSYGKLTF	Primary Tumor	TRA	18	0.5	0.555556	0.222222	0.222222	0.111111	0.111111	0.222222	0.777778	1936.07	6.91168	0	3.61111	0.401235	0.263333	-0.888889	0.111111	3.61111	0.339113	0.0143095	-4.08889	0.166667	0.277778	0.166667
TCGA-E2-A158	CCFDRGSTLGRLYF	Primary Tumor	TRA	14	0.428571	0.5	0.214286	0.214286	0.142857	0.0714286	0.214286	0.5	1637.88	8.05829	0.0714286	4.65	0.516667	0.246429	0.15	0.214286	4.65	0.163533	0.0136974	6.65	0.357143	0.214286	0.142857
TCGA-LL-A5YL	CAVRMDSSYKLIF	Primary Tumor	TRA	13	0.307692	0.461538	0.153846	0.230769	0.153846	0.0769231	0.230769	0.461538	1532.83	8.19733	0.0769231	5.01538	0.557265	0.318462	0.515385	0.153846	5.01538	0.0884782	0.0113234	32.3308	0.384615	0.153846	0.230769
TCGA-A8-A09M	CIVSNTNAGKSTF	Primary Tumor	TRA	13	0.538462	0.769231	0.0769231	0.0769231	0.0769231	0	0.0769231	0.538462	1341.49	8.22223	0.0769231	4.61538	0.512821	0.301538	0.115385	0.0769231	4.61538	0.976728	0.00850263	-12.4308	0.230769	0.384615	0.0769231
TCGA-A8-A09M	CSEGSNYGGSQGNLIF	Primary Tumor	TRA	16	0.5	0.625	0.125	0.0625	0	0.0625	0.0625	0.5625	1632.71	3.99957	-0.0625	4.14375	0.460417	0.251875	-0.35625	0.125	4.14375	0.827211	0.00672822	30.55	0.25	0.5625	0.125
TCGA-A8-A09M	CAVSSPGTYKYIF	Primary Tumor	TRA	13	0.461538	0.615385	0.230769	0.0769231	0.0769231	0	0.153846	0.538462	1435.64	8.17523	0.0769231	4.88462	0.542735	0.350769	0.384615	0.230769	4.88462	0.214446	0.00850263	51.3154	0.384615	0.307692	0.0769231
TCGA-A8-A09M	CAVNAGTNAGKSTF	Primary Tumor	TRA	14	0.642857	0.857143	0.0714286	0.0714286	0.0714286	0	0.0714286	0.642857	1340.46	8.22223	0.0714286	4.57143	0.507937	0.297143	0.0714286	0.0714286	4.57143	0.945517	0.00826959	-4.76429	0.142857	0.357143	0.214286
TCGA-C8-A8HP	CLLPLCCERWKNNNAGNMLTF	Primary Tumor	TRA	21	0.285714	0.52381	0.0952381	0.142857	0.0952381	0.047619	0.190476	0.333333	2440.88	7.95795	0.047619	4.48571	0.498413	0.321429	-0.0142857	0.0952381	4.48571	0.569003	0.0130642	56.9762	0.285714	0.285714	0.333333
TCGA-C8-A8HP	CALLRGSDYKLSF	Primary Tumor	TRA	13	0.384615	0.461538	0.153846	0.230769	0.153846	0.0769231	0.230769	0.538462	1472.71	8.19733	0.0769231	4.75385	0.528205	0.277692	0.253846	0.153846	4.75385	0.107371	0.00968583	10.9846	0.384615	0.230769	0.307692
TCGA-C8-A8HP	CAASITGSARQLTF	Primary Tumor	TRA	14	0.642857	0.642857	0.0714286	0.0714286	0.0714286	0	0.0714286	0.714286	1425.61	8.24969	0.0714286	5.04286	0.560317	0.308571	0.542857	0.0714286	5.04286	0.991678	0.00906148	25.7929	0.214286	0.214286	0.285714
TCGA-C8-A8HP	CAASITGSARQLTF	Primary Tumor	TRA	14	0.642857	0.642857	0.0714286	0.0714286	0.0714286	0	0.0714286	0.714286	1425.61	8.24969	0.0714286	5.04286	0.560317	0.308571	0.542857	0.0714286	5.04286	0.991678	0.00906148	25.7929	0.214286	0.214286	0.285714
TCGA-C8-A8HP	CAVSNQAGTALIF	Primary Tumor	TRA	13	0.538462	0.692308	0.0769231	0	0	0	0	0.538462	1294.48	5.51813	0	5.6	0.622222	0.310769	1.1	0.0769231	5.6	-1	0	-3.1	0.307692	0.230769	0.307692
TCGA-C8-A8HP	CAVTVRSGNTGKLIF	Primary Tumor	TRA	15	0.466667	0.666667	0.0666667	0.133333	0.133333	0	0.133333	0.533333	1565.84	9.50775	0.133333	5.09333	0.565926	0.303333	0.593333	0.0666667	5.09333	0.188148	0.0039899	4.66667	0.333333	0.266667	0.133333
TCGA-C8-A8HP	CAACKQTGANNLFF	Primary Tumor	TRA	14	0.5	0.642857	0.142857	0.0714286	0.0714286	0	0.0714286	0.5	1487.7	8.05841	0.0714286	4.80714	0.534127	0.305	0.307143	0.142857	4.80714	0.991678	0.00906148	45.4286	0.214286	0.214286	0.285714
TCGA-C8-A8HP	CAASEQNAGGTSYGKLTF	Primary Tumor	TRA	18	0.611111	0.666667	0.111111	0.111111	0.0555556	0.0555556	0.111111	0.722222	1804.93	5.99359	0	4.2	0.466667	0.295	-0.3	0.111111	4.2	0.434204	0.0224725	25.6889	0.166667	0.333333	0.277778
TCGA-C8-A8HP	CAGQNNNARLMF	Primary Tumor	TRA	12	0.333333	0.583333	0.0833333	0.0833333	0.0833333	0	0.0833333	0.416667	1338.52	8.24969	0.0833333	4.14167	0.460185	0.300833	-0.358333	0.0833333	4.14167	0.965909	0.00861111	9.16667	0.166667	0.333333	0.333333
TCGA-C8-A8HP	CFPPSRGSNYKLTF	Primary Tumor	TRA	14	0.357143	0.571429	0.214286	0.142857	0.142857	0	0.285714	0.571429	1616.84	9.31244	0.142857	3.98571	0.442857	0.372857	-0.514286	0.214286	3.98571	0.0877189	0.00475737	61	0.285714	0.428571	0.0714286
TCGA-C8-A8HP	CAMREGREYGGATNKLIF	Primary Tumor	TRA	18	0.388889	0.444444	0.111111	0.277778	0.166667	0.111111	0.277778	0.611111	2016.3	8.19757	0.0555556	4.08333	0.453704	0.307778	-0.416667	0.111111	4.08333	0.223238	0.0114564	2.76667	0.222222	0.222222	0.333333
TCGA-C8-A8HP	CALLRGSDYKLSF	Primary Tumor	TRA	13	0.384615	0.461538	0.153846	0.230769	0.153846	0.0769231	0.230769	0.538462	1472.71	8.19733	0.0769231	4.75385	0.528205	0.277692	0.253846	0.153846	4.75385	0.107371	0.00968583	10.9846	0.384615	0.230769	0.307692
TCGA-AR-A2LH	CAVGGRGYSTLTF	Primary Tumor	TRA	13	0.615385	0.692308	0.153846	0.0769231	0.0769231	0	0.0769231	0.615385	1331.5	8.22198	0.0769231	4.95385	0.550427	0.255385	0.453846	0.153846	4.95385	0.995249	0.00928254	8.62308	0.307692	0.307692	0.153846
TCGA-AR-A2LH	CAVGGRGYSTLTF	Primary Tumor	TRA	13	0.615385	0.692308	0.153846	0.0769231	0.0769231	0	0.0769231	0.615385	1331.5	8.22198	0.0769231	4.95385	0.550427	0.255385	0.453846	0.153846	4.95385	0.995249	0.00928254	8.62308	0.307692	0.307692	0.153846
TCGA-AR-A2LH	CAVGGRGYSTLTF	Primary Tumor	TRA	13	0.615385	0.692308	0.153846	0.0769231	0.0769231	0	0.0769231	0.615385	1331.5	8.22198	0.0769231	4.95385	0.550427	0.255385	0.453846	0.153846	4.95385	0.995249	0.00928254	8.62308	0.307692	0.307692	0.153846
TCGA-AR-A2LH	CAVGGRGYSTLTF	Primary Tumor	TRA	13	0.615385	0.692308	0.153846	0.0769231	0.0769231	0	0.0769231	0.615385	1331.5	8.22198	0.0769231	4.95385	0.550427	0.255385	0.453846	0.153846	4.95385	0.995249	0.00928254	8.62308	0.307692	0.307692	0.153846
TCGA-AR-A2LH	CAACEGVCFGNEELAF	Primary Tumor	TRA	16	0.5	0.625	0.125	0.1875	0	0.1875	0.1875	0.5	1662.86	3.67291	-0.1875	5.23125	0.58125	0.28875	0.73125	0.125	5.23125	0.283018	0.016078	51.9062	0.25	0.1875	0.4375
TCGA-AR-A2LH	CAASEGVSFGNEKLTF	Primary Tumor	TRA	16	0.5	0.625	0.125	0.1875	0.0625	0.125	0.1875	0.625	1659.81	4.53131	-0.0625	4.6375	0.515278	0.293125	0.1375	0.125	4.6375	0.283018	0.0140325	18.5125	0.25	0.3125	0.3125
TCGA-AR-A2LH	CCAGSSNTGKLIF	Primary Tumor	TRA	13	0.615385	0.692308	0.0769231	0.0769231	0.0769231	0	0.0769231	0.538462	1300.5	8.05841	0.0769231	5.06923	0.563248	0.273846	0.569231	0.0769231	5.06923	0.976728	0.00850263	-2.07692	0.230769	0.384615	0.153846
TCGA-AR-A2LH	CAFMKHNIGNYGQNFVF	Primary Tumor	TRA	17	0.235294	0.470588	0.294118	0.0588235	0.0588235	0	0.0588235	0.352941	1990.27	8.20636	0.0588235	4.50588	0.500654	0.287059	0.00588235	0.235294	4.50588	0.970683	0.0083297	30.3588	0.352941	0.294118	0.117647
TCGA-AR-A2LH	CAVTPTGGGADGLTF	Primary Tumor	TRA	15	0.666667	0.866667	0.0666667	0.0666667	0	0.0666667	0.133333	0.733333	1366.5	3.79987	-0.0666667	5.04	0.56	0.304667	0.54	0.0666667	5.04	0.145735	0.00886364	11.3733	0.2	0.333333	0.2
TCGA-AR-A2LH	CAFMKPTGTASKLTF	Primary Tumor	TRA	15	0.533333	0.6	0.133333	0.133333	0.133333	0	0.2	0.666667	1602.92	9.31415	0.133333	4.81333	0.534815	0.358667	0.313333	0.133333	4.81333	0.17495	0.00482323	-4.44667	0.2	0.2	0.266667
TCGA-AR-A2LH	CLLLCSKSHGSSNTGKLIF	Primary Tumor	TRA	19	0.473684	0.526316	0.105263	0.105263	0.105263	0	0.105263	0.526316	2008.37	8.90448	0.105263	4.93684	0.548538	0.271053	0.436842	0.0526316	4.93684	0.446594	0.00783806	6.41579	0.315789	0.368421	0.210526
TCGA-AR-A2LH	CLLLCSKSHGSSNTGKLIF	Primary Tumor	TRA	19	0.473684	0.526316	0.105263	0.105263	0.105263	0	0.105263	0.526316	2008.37	8.90448	0.105263	4.93684	0.548538	0.271053	0.436842	0.0526316	4.93684	0.446594	0.00783806	6.41579	0.315789	0.368421	0.210526
TCGA-AR-A2LH	CLLLCSKSHGSSNTGKLIF	Primary Tumor	TRA	19	0.473684	0.526316	0.105263	0.105263	0.105263	0	0.105263	0.526316	2008.37	8.90448	0.105263	4.93684	0.548538	0.271053	0.436842	0.0526316	4.93684	0.446594	0.00783806	6.41579	0.315789	0.368421	0.210526
TCGA-AR-A2LH	CAATGANNLFF	Primary Tumor	TRA	11	0.545455	0.727273	0.181818	0	0	0	0	0.454545	1128.26	5.51813	0	5.33636	0.592929	0.266364	0.836364	0.181818	5.33636	-1	0	-6.34545	0.272727	0.272727	0.363636
TCGA-AR-A2LH	CAATGANNLFF	Primary Tumor	TRA	11	0.545455	0.727273	0.181818	0	0	0	0	0.454545	1128.26	5.51813	0	5.33636	0.592929	0.266364	0.836364	0.181818	5.33636	-1	0	-6.34545	0.272727	0.272727	0.363636
TCGA-A8-A07B	CAVNANTGGFKTIF	Primary Tumor	TRA	14	0.5	0.714286	0.142857	0.0714286	0.0714286	0	0.0714286	0.5	1442.64	8.22223	0.0714286	5.02143	0.557937	0.293571	0.521429	0.142857	5.02143	0.945517	0.00826959	-4.76429	0.285714	0.285714	0.142857
TCGA-A8-A07B	CAADARLRGGSQGNLIF	Primary Tumor	TRA	17	0.470588	0.588235	0.0588235	0.176471	0.117647	0.0588235	0.176471	0.647059	1748.96	8.24957	0.0588235	4.57647	0.508497	0.287647	0.0764706	0.0588235	4.57647	0.643827	0.0252821	24.3471	0.235294	0.294118	0.294118
TCGA-BH-A0H3	CALSEGGGNKLTF	Primary Tumor	TRA	13	0.538462	0.615385	0.0769231	0.153846	0.0769231	0.0769231	0.153846	0.615385	1296.45	5.99432	0	4.58462	0.509402	0.266923	0.0846154	0.0769231	4.58462	0.0709504	0.0321528	57.6769	0.230769	0.384615	0.307692
TCGA-BH-A0H3	CALSEGGGNNLTF	Primary Tumor	TRA	13	0.538462	0.692308	0.0769231	0.0769231	0	0.0769231	0.0769231	0.538462	1282.38	3.99969	-0.0769231	4.61538	0.512821	0.244615	0.115385	0.0769231	4.61538	1	0.009149	45.9923	0.230769	0.461538	0.307692
TCGA-BH-A0H3	CAVPLYNTDKLIF	Primary Tumor	TRA	13	0.230769	0.538462	0.153846	0.153846	0.0769231	0.0769231	0.230769	0.384615	1496.77	5.82794	0	5.18462	0.576068	0.365385	0.684615	0.153846	5.18462	0.0869945	0.00395833	4.45385	0.461538	0.153846	0.230769
TCGA-BH-A0H3	CAVPLYNTDKLIF	Primary Tumor	TRA	13	0.230769	0.538462	0.153846	0.153846	0.0769231	0.0769231	0.230769	0.384615	1496.77	5.82794	0	5.18462	0.576068	0.365385	0.684615	0.153846	5.18462	0.0869945	0.00395833	4.45385	0.461538	0.153846	0.230769
TCGA-BH-A0H3	CAYSYGTASKLTF	Primary Tumor	TRA	13	0.615385	0.615385	0.230769	0.0769231	0.0769231	0	0.0769231	0.615385	1411.58	8.17523	0.0769231	4.71538	0.523932	0.285385	0.215385	0.230769	4.71538	0.976728	0.00850263	-0.869231	0.307692	0.230769	0.230769
TCGA-BH-A0H3	CAYRIFNDMRF	Primary Tumor	TRA	11	0.181818	0.363636	0.272727	0.272727	0.181818	0.0909091	0.272727	0.363636	1435.67	8.22186	0.0909091	4.40909	0.489899	0.299091	-0.0909091	0.272727	4.40909	0.0714377	0.0118298	-13.1364	0.363636	0.0909091	0.181818
TCGA-BH-A0H3	CALSGPGANSKLTF	Primary Tumor	TRA	14	0.571429	0.714286	0.0714286	0.0714286	0.0714286	0	0.142857	0.642857	1365.55	8.22223	0.0714286	4.81429	0.534921	0.323571	0.314286	0.0714286	4.81429	0.156361	0.00826959	5.97143	0.214286	0.428571	0.285714
TCGA-BH-A0H3	CALSEAIYGNKLVF	Primary Tumor	TRA	14	0.357143	0.5	0.142857	0.142857	0.0714286	0.0714286	0.142857	0.428571	1527.78	5.99359	0	5.34286	0.593651	0.306429	0.842857	0.142857	5.34286	0.115471	0.0318889	21.7643	0.428571	0.214286	0.357143
TCGA-BH-A0H3	CALSEAIYGNKLVF	Primary Tumor	TRA	14	0.357143	0.5	0.142857	0.142857	0.0714286	0.0714286	0.142857	0.428571	1527.78	5.99359	0	5.34286	0.593651	0.306429	0.842857	0.142857	5.34286	0.115471	0.0318889	21.7643	0.428571	0.214286	0.357143
TCGA-BH-A0H3	CAVAILGAGANNLFF	Primary Tumor	TRA	15	0.466667	0.666667	0.133333	0	0	0	0	0.4	1480.73	5.51813	0	6.08667	0.676296	0.275333	1.58667	0.133333	6.08667	-1	0	10.8533	0.4	0.266667	0.4
TCGA-BH-A0H3	CAVTDSNYQLIW	Primary Tumor	TRA	12	0.333333	0.583333	0.166667	0.0833333	0	0.0833333	0.0833333	0.416667	1412.57	3.79987	-0.0833333	4.71667	0.524074	0.316667	0.216667	0.166667	4.71667	0.954546	0.00902778	18.1417	0.416667	0.166667	0.166667
TCGA-BH-A0H3	CAVTDSNYQLIW	Primary Tumor	TRA	12	0.333333	0.583333	0.166667	0.0833333	0	0.0833333	0.0833333	0.416667	1412.57	3.79987	-0.0833333	4.71667	0.524074	0.316667	0.216667	0.166667	4.71667	0.954546	0.00902778	18.1417	0.416667	0.166667	0.166667
TCGA-C8-A26Z	CAASENSGYSTLTF	Primary Tumor	TRA	14	0.642857	0.714286	0.142857	0.0714286	0	0.0714286	0.0714286	0.642857	1450.53	3.99957	-0.0714286	4.51429	0.501587	0.273571	0.0142857	0.142857	4.51429	0.991678	0.00906148	25.7929	0.214286	0.357143	0.285714
TCGA-C8-A12U	CLLLCSKYPPGVNRDDKIIF	Primary Tumor	TRA	20	0.2	0.5	0.1	0.25	0.15	0.1	0.35	0.45	2294.73	8.03302	0.05	4.695	0.521667	0.3775	0.195	0.1	4.695	0.166	0.0128798	26.44	0.4	0.25	0.15
TCGA-C8-A12U	CALRSGSARQLTF	Primary Tumor	TRA	13	0.538462	0.538462	0.0769231	0.153846	0.153846	0	0.153846	0.692308	1409.61	10.3519	0.153846	4.6	0.511111	0.296923	0.1	0.0769231	4.6	0.0709504	0.00315048	82.1538	0.230769	0.230769	0.307692
TCGA-C8-A12U	CADSGTYKYIF	Primary Tumor	TRA	11	0.454545	0.545455	0.272727	0.181818	0.0909091	0.0909091	0.181818	0.545455	1267.41	5.82733	0	4.47273	0.49697	0.293636	-0.0272727	0.272727	4.47273	0.0338702	0.0315741	11.1636	0.363636	0.181818	0.0909091
TCGA-C8-A12U	CISVLYNAGNMLTF	Primary Tumor	TRA	14	0.357143	0.571429	0.142857	0	0	0	0	0.285714	1545.82	5.5174	0	5.57857	0.619841	0.277857	1.07857	0.142857	5.57857	-1	0	12.0357	0.428571	0.285714	0.285714
TCGA-C8-A12U	CADSHPVNSGGSNYKLTF	Primary Tumor	TRA	18	0.444444	0.722222	0.166667	0.111111	0.0555556	0.0555556	0.166667	0.611111	1897.03	6.73358	0	3.98333	0.442593	0.309444	-0.516667	0.111111	3.98333	0.402798	0.0174786	33.5222	0.222222	0.444444	0.111111
TCGA-C8-A12U	CARSTSGTYKYIF	Primary Tumor	TRA	13	0.538462	0.538462	0.230769	0.153846	0.153846	0	0.153846	0.615385	1496.69	9.19598	0.153846	4.28462	0.476068	0.297692	-0.215385	0.230769	4.28462	0.233903	0.00500945	36.5	0.307692	0.230769	0.0769231
TCGA-C8-A12U	CAVIGGAAGNKLTF	Primary Tumor	TRA	14	0.571429	0.714286	0.0714286	0.0714286	0.0714286	0	0.0714286	0.571429	1321.54	8.22223	0.0714286	5.49286	0.610317	0.292143	0.992857	0.0714286	5.49286	0.945517	0.00826959	25.6357	0.285714	0.285714	0.285714
TCGA-C8-A12U	CAVRGRSKTGGSYIPTF	Primary Tumor	TRA	17	0.529412	0.647059	0.117647	0.176471	0.176471	0	0.235294	0.705882	1800.05	10.0536	0.176471	4.25294	0.472549	0.332353	-0.247059	0.117647	4.25294	0.250022	0.0386607	38.0941	0.235294	0.352941	0.0588235
TCGA-BH-A0W5	CCEGTGTYKYIF	Primary Tumor	TRA	12	0.5	0.5	0.25	0.166667	0.0833333	0.0833333	0.166667	0.5	1384.58	5.98602	0	4.50833	0.500926	0.286667	0.00833333	0.25	4.50833	0.0916276	0.0313889	-12.0583	0.333333	0.166667	0.0833333
TCGA-BH-A0W5	CAGQYAGGTSYGKLTF	Primary Tumor	TRA	16	0.625	0.625	0.1875	0.0625	0.0625	0	0.0625	0.6875	1623.78	8.17523	0.0625	4.43125	0.492361	0.274375	-0.06875	0.1875	4.43125	0.90155	0.00766888	13.6625	0.25	0.3125	0.1875
TCGA-BH-A0W5	CAASGGSNYKLTF	Primary Tumor	TRA	13	0.615385	0.692308	0.153846	0.0769231	0.0769231	0	0.0769231	0.615385	1318.45	8.19745	0.0769231	4.56923	0.507692	0.272308	0.0692308	0.153846	4.56923	0.976728	0.00850263	21.6846	0.230769	0.384615	0.230769
TCGA-BH-A0W5	CILGPGNNNDMRF	Primary Tumor	TRA	13	0.230769	0.615385	0.0769231	0.153846	0.0769231	0.0769231	0.230769	0.384615	1450.64	5.82941	0	4.08462	0.453846	0.32	-0.415385	0.0769231	4.08462	0.0653029	0.00791667	11.7154	0.230769	0.461538	0.153846
TCGA-BH-A0W5	CAGNTGKLIF	Primary Tumor	TRA	10	0.5	0.6	0.1	0.1	0.1	0	0.1	0.5	1023.21	8.22223	0.1	5.15	0.572222	0.283	0.65	0.1	5.15	0.653974	0.00777778	-33.45	0.3	0.3	0.2
TCGA-BH-A0W5	CYGRSSTTGGGNKLTF	Primary Tumor	TRA	16	0.625	0.6875	0.125	0.125	0.125	0	0.125	0.6875	1648.79	9.31244	0.125	3.9125	0.434722	0.255	-0.5875	0.125	3.9125	0.39778	0.00724116	65.5875	0.1875	0.4375	0.0625
TCGA-BH-A0W5	CAARLGGYNKLIF	Primary Tumor	TRA	13	0.384615	0.461538	0.153846	0.153846	0.153846	0	0.153846	0.461538	1425.7	9.31244	0.153846	5.03846	0.559829	0.288462	0.538462	0.153846	5.03846	0.0968171	0.00234385	23.8769	0.384615	0.230769	0.307692
TCGA-BH-A0DE	CAVKDSNYQLIW	Primary Tumor	TRA	12	0.25	0.5	0.166667	0.166667	0.0833333	0.0833333	0.166667	0.416667	1439.63	5.82794	0	4.45	0.494444	0.336667	-0.05	0.166667	4.45	0.71572	0.00448413	22.8167	0.416667	0.166667	0.166667
TCGA-BH-A0DE	CAGDSNYQLIW	Primary Tumor	TRA	11	0.363636	0.545455	0.181818	0.0909091	0	0.0909091	0.0909091	0.454545	1269.38	3.79987	-0.0909091	4.38182	0.486869	0.292727	-0.118182	0.181818	4.38182	0.830136	0.00846167	26.6	0.363636	0.272727	0.181818
TCGA-BH-A0DE	CAFYGGATNKLIF	Primary Tumor	TRA	13	0.461538	0.538462	0.230769	0.0769231	0.0769231	0	0.0769231	0.461538	1404.63	8.19745	0.0769231	5.25385	0.583761	0.278462	0.753846	0.230769	5.25385	0.976728	0.00850263	30.8623	0.384615	0.230769	0.230769
TCGA-BH-A0DE	CAFYGGATNKLIF	Primary Tumor	TRA	13	0.461538	0.538462	0.230769	0.0769231	0.0769231	0	0.0769231	0.461538	1404.63	8.19745	0.0769231	5.25385	0.583761	0.278462	0.753846	0.230769	5.25385	0.976728	0.00850263	30.8623	0.384615	0.230769	0.230769
TCGA-D8-A1XO	CAARGADSWGKLQF	Primary Tumor	TRA	14	0.5	0.571429	0.142857	0.214286	0.142857	0.0714286	0.214286	0.714286	1509.69	8.22211	0.0714286	4.25714	0.473016	0.306429	-0.242857	0.142857	4.25714	0.0876016	0.0156427	3.21429	0.214286	0.214286	0.285714
TCGA-D8-A1XO	CAASGGNEKLTF	Primary Tumor	TRA	12	0.583333	0.666667	0.0833333	0.166667	0.0833333	0.0833333	0.166667	0.666667	1197.32	5.99432	0	4.45833	0.49537	0.289167	-0.0416667	0.0833333	4.45833	0.71572	0.00448413	15.5833	0.166667	0.333333	0.333333
TCGA-D8-A1XO	CAGREGSYIPTF	Primary Tumor	TRA	12	0.5	0.583333	0.166667	0.166667	0.0833333	0.0833333	0.25	0.666667	1300.44	5.9942	0	4.36667	0.485185	0.3375	-0.133333	0.166667	4.36667	0.0749788	0.00448413	17.05	0.25	0.333333	0.166667
TCGA-A8-A097	CAVRDITGSNYQLIW	Primary Tumor	TRA	15	0.333333	0.533333	0.133333	0.133333	0.0666667	0.0666667	0.133333	0.466667	1738.96	5.82867	0	4.64667	0.516296	0.313333	0.146667	0.133333	4.64667	0.999558	0.00320707	3.67333	0.4	0.2	0.133333
TCGA-A8-A097	CAVRDITGSNYQLIW	Primary Tumor	TRA	15	0.333333	0.533333	0.133333	0.133333	0.0666667	0.0666667	0.133333	0.466667	1738.96	5.82867	0	4.64667	0.516296	0.313333	0.146667	0.133333	4.64667	0.999558	0.00320707	3.67333	0.4	0.2	0.133333
TCGA-A8-A097	CAENSGGSNYKLTF	Primary Tumor	TRA	14	0.5	0.642857	0.142857	0.142857	0.0714286	0.0714286	0.142857	0.571429	1490.59	5.99359	0	3.93571	0.437302	0.275714	-0.564286	0.142857	3.93571	0.343039	0.0248025	20.85	0.214286	0.428571	0.214286
TCGA-A8-A097	CAENSGGSNYKLTF	Primary Tumor	TRA	14	0.5	0.642857	0.142857	0.142857	0.0714286	0.0714286	0.142857	0.571429	1490.59	5.99359	0	3.93571	0.437302	0.275714	-0.564286	0.142857	3.93571	0.343039	0.0248025	20.85	0.214286	0.428571	0.214286
TCGA-A8-A097	CALISGAGSYQLTF	Primary Tumor	TRA	14	0.571429	0.571429	0.142857	0	0	0	0	0.571429	1430.62	5.5174	0	5.43571	0.603968	0.276429	0.935714	0.142857	5.43571	-1	0	12.0357	0.357143	0.285714	0.285714
TCGA-A8-A097	CAVSEGTSGTYKYIF	Primary Tumor	TRA	15	0.533333	0.6	0.2	0.133333	0.0666667	0.0666667	0.133333	0.6	1625.8	5.99286	0	4.63333	0.514815	0.295333	0.133333	0.2	4.63333	0.24067	0.0288636	10.8533	0.333333	0.266667	0.133333
TCGA-A8-A097	CAVSAYTGRRALTF	Primary Tumor	TRA	14	0.571429	0.642857	0.142857	0.142857	0.142857	0	0.142857	0.642857	1515.74	9.50409	0.142857	4.91429	0.546032	0.298571	0.414286	0.142857	4.91429	0.849877	0.0311436	46.8857	0.285714	0.142857	0.285714
TCGA-E2-A10A	CAVTDSNYQLIW	Primary Tumor	TRA	12	0.333333	0.583333	0.166667	0.0833333	0	0.0833333	0.0833333	0.416667	1412.57	3.79987	-0.0833333	4.71667	0.524074	0.316667	0.216667	0.166667	4.71667	0.954546	0.00902778	18.1417	0.416667	0.166667	0.166667
TCGA-E2-A10A	CAVNTGNQFYF	Primary Tumor	TRA	11	0.363636	0.636364	0.272727	0	0	0	0	0.363636	1263.38	5.5174	0	4.60909	0.512121	0.283636	0.109091	0.272727	4.60909	-1	0	1.86455	0.363636	0.272727	0.0909091
TCGA-E2-A10A	CAGNNYGQNFVF	Primary Tumor	TRA	12	0.333333	0.666667	0.25	0	0	0	0	0.333333	1333.43	5.5174	0	4.33333	0.481481	0.266667	-0.166667	0.25	4.33333	-1	0	-17.5083	0.333333	0.416667	0.0833333
TCGA-E2-A10A	CAGNNYGQNFVF	Primary Tumor	TRA	12	0.333333	0.666667	0.25	0	0	0	0	0.333333	1333.43	5.5174	0	4.33333	0.481481	0.266667	-0.166667	0.25	4.33333	-1	0	-17.5083	0.333333	0.416667	0.0833333
TCGA-E2-A10A	CAGNNYGQNFVF	Primary Tumor	TRA	12	0.333333	0.666667	0.25	0	0	0	0	0.333333	1333.43	5.5174	0	4.33333	0.481481	0.266667	-0.166667	0.25	4.33333	-1	0	-17.5083	0.333333	0.416667	0.0833333
TCGA-E2-A10A	CAGNNYGQNFVF	Primary Tumor	TRA	12	0.333333	0.666667	0.25	0	0	0	0	0.333333	1333.43	5.5174	0	4.33333	0.481481	0.266667	-0.166667	0.25	4.33333	-1	0	-17.5083	0.333333	0.416667	0.0833333
TCGA-S3-AA11	CALCYNNNDMRF	Primary Tumor	TRA	12	0.25	0.583333	0.166667	0.166667	0.0833333	0.0833333	0.166667	0.25	1463.66	5.82184	0	4.125	0.458333	0.281667	-0.375	0.166667	4.125	0.738051	0.00896825	2.88333	0.25	0.25	0.25
TCGA-S3-AA11	CAGHQGGSEKLVF	Primary Tumor	TRA	13	0.461538	0.538462	0.153846	0.153846	0.0769231	0.0769231	0.153846	0.692308	1332.48	6.73956	0	4.42308	0.491453	0.289231	-0.0769231	0.0769231	4.42308	0.830755	0.00395833	27.0077	0.230769	0.307692	0.230769
TCGA-S3-AA11	CAYRSAGSRDDKIIF	Primary Tumor	TRA	15	0.4	0.533333	0.133333	0.333333	0.2	0.133333	0.333333	0.666667	1701.9	8.1972	0.0666667	4.14667	0.460741	0.314667	-0.353333	0.133333	4.14667	0.0825503	0.0170706	28.8733	0.266667	0.2	0.133333
TCGA-BH-A0GZ	CAVEGLGRGSTLGRLYF	Primary Tumor	TRA	17	0.470588	0.529412	0.117647	0.176471	0.117647	0.0588235	0.176471	0.588235	1799.06	8.22198	0.0588235	4.84118	0.537908	0.259412	0.341176	0.117647	4.84118	0.100776	0.0228401	4.41765	0.352941	0.294118	0.294118
TCGA-A7-A26F	CALYSGGGADGLTF	Primary Tumor	TRA	14	0.642857	0.714286	0.142857	0.0714286	0	0.0714286	0.0714286	0.642857	1331.45	3.79987	-0.0714286	5.11429	0.568254	0.233571	0.614286	0.142857	5.11429	0.991678	0.00906148	23.6	0.285714	0.357143	0.285714
TCGA-A7-A26F	CAQYSGGGADGLPF	Primary Tumor	TRA	14	0.571429	0.714286	0.142857	0.0714286	0	0.0714286	0.142857	0.714286	1342.43	3.79987	-0.0714286	4.52857	0.503175	0.302857	0.0285714	0.142857	4.52857	0.746689	0.00906148	36.9143	0.214286	0.428571	0.214286
TCGA-A7-A26F	CALYSGGGAGGLTF	Primary Tumor	TRA	14	0.714286	0.714286	0.142857	0	0	0	0	0.642857	1273.41	5.5174	0	5.33571	0.592857	0.221429	0.835714	0.142857	5.33571	-1	0	38.4786	0.285714	0.428571	0.285714
TCGA-A7-A26F	CALYSGGGADGLTF	Primary Tumor	TRA	14	0.642857	0.714286	0.142857	0.0714286	0	0.0714286	0.0714286	0.642857	1331.45	3.79987	-0.0714286	5.11429	0.568254	0.233571	0.614286	0.142857	5.11429	0.991678	0.00906148	23.6	0.285714	0.357143	0.285714
TCGA-A7-A26F	CALYSGGGADGLTF	Primary Tumor	TRA	14	0.642857	0.714286	0.142857	0.0714286	0	0.0714286	0.0714286	0.642857	1331.45	3.79987	-0.0714286	5.11429	0.568254	0.233571	0.614286	0.142857	5.11429	0.991678	0.00906148	23.6	0.285714	0.357143	0.285714
TCGA-A7-A26F	CCECRGSQGNLIF	Primary Tumor	TRA	13	0.461538	0.538462	0.0769231	0.153846	0.0769231	0.0769231	0.153846	0.461538	1429.64	5.98126	0	4.65385	0.517094	0.280769	0.153846	0.0769231	4.65385	0.750084	0.00791667	44.7846	0.230769	0.307692	0.153846
TCGA-D8-A1XZ	CVVISNNAGNMLTF	Primary Tumor	TRA	14	0.357143	0.714286	0.0714286	0	0	0	0	0.285714	1482.72	5.51813	0	5.45	0.605556	0.29	0.95	0.0714286	5.45	-1	0	6.65	0.357143	0.357143	0.214286
TCGA-D8-A1XZ	CAVRPGRYNFNKFYF	Primary Tumor	TRA	15	0.2	0.466667	0.333333	0.2	0.2	0	0.266667	0.4	1882.15	9.78387	0.2	3.99333	0.443704	0.334	-0.506667	0.333333	3.99333	0.0817291	0.00752525	44.6473	0.4	0.266667	0.0666667
TCGA-D8-A1XZ	CAVRPGRYNFNKFYF	Primary Tumor	TRA	15	0.2	0.466667	0.333333	0.2	0.2	0	0.266667	0.4	1882.15	9.78387	0.2	3.99333	0.443704	0.334	-0.506667	0.333333	3.99333	0.0817291	0.00752525	44.6473	0.4	0.266667	0.0666667
TCGA-AO-A0JE	CLLLCSGGYSTLTF	Primary Tumor	TRA	14	0.571429	0.571429	0.142857	0	0	0	0	0.428571	1477.74	5.5108	0	5.77857	0.642063	0.232857	1.27857	0.142857	5.77857	-1	0	34.6071	0.428571	0.285714	0.285714
TCGA-AO-A0JE	CLLLCSGGYSTLTF	Primary Tumor	TRA	14	0.571429	0.571429	0.142857	0	0	0	0	0.428571	1477.74	5.5108	0	5.77857	0.642063	0.232857	1.27857	0.142857	5.77857	-1	0	34.6071	0.428571	0.285714	0.285714
TCGA-AO-A0JE	CAGERSNDYKLSF	Primary Tumor	TRA	13	0.384615	0.538462	0.153846	0.307692	0.153846	0.153846	0.307692	0.615385	1489.61	6.06183	0	3.63077	0.403419	0.293846	-0.869231	0.153846	3.63077	0.0307751	0.00304784	30.7	0.230769	0.307692	0.230769
TCGA-AO-A0JE	CALTVTSGTASKLTF	Primary Tumor	TRA	15	0.666667	0.733333	0.0666667	0.0666667	0.0666667	0	0.0666667	0.666667	1499.73	8.22223	0.0666667	5.3	0.588889	0.298667	0.8	0.0666667	5.3	0.920366	0.0079798	0.58	0.266667	0.2	0.266667
TCGA-AO-A0JE	CALAGTYKYIF	Primary Tumor	TRA	11	0.454545	0.454545	0.272727	0.0909091	0.0909091	0	0.0909091	0.454545	1249.48	8.17523	0.0909091	5.37273	0.59697	0.3	0.872727	0.272727	5.37273	0.830136	0.00846167	1.37273	0.454545	0.0909091	0.272727
TCGA-AO-A0JE	CAESMKTGANNLFF	Primary Tumor	TRA	14	0.428571	0.571429	0.142857	0.142857	0.0714286	0.0714286	0.142857	0.5	1532.74	5.99432	0	4.57857	0.50873	0.295714	0.0785714	0.142857	4.57857	0.673795	0.0126296	10.9143	0.214286	0.285714	0.357143
TCGA-AO-A0JE	CAGERSNDYKLSF	Primary Tumor	TRA	13	0.384615	0.538462	0.153846	0.307692	0.153846	0.153846	0.307692	0.615385	1489.61	6.06183	0	3.63077	0.403419	0.293846	-0.869231	0.153846	3.63077	0.0307751	0.00304784	30.7	0.230769	0.307692	0.230769
TCGA-AO-A0JE	CATDARGGYSTLTF	Primary Tumor	TRA	14	0.642857	0.714286	0.142857	0.142857	0.0714286	0.0714286	0.142857	0.714286	1462.58	5.82867	0	4.47857	0.497619	0.270714	-0.0214286	0.142857	4.47857	0.761836	0.00908642	14.7857	0.214286	0.214286	0.214286
TCGA-AO-A0JE	CAGAQRKLHTYI	Primary Tumor	TRA	12	0.416667	0.416667	0.166667	0.166667	0.166667	0	0.166667	0.666667	1360.58	9.31281	0.166667	4.24167	0.471296	0.3325	-0.258333	0.0833333	4.24167	0.490842	0.0271429	-11.2667	0.25	0.0833333	0.25
TCGA-D8-A27R	CAVRASGGSYIPTF	Primary Tumor	TRA	14	0.571429	0.714286	0.142857	0.0714286	0.0714286	0	0.142857	0.642857	1428.61	8.22198	0.0714286	5.00714	0.556349	0.330714	0.507143	0.142857	5.00714	0.343039	0.00826959	24.8571	0.285714	0.357143	0.142857
TCGA-D8-A27R	CGEPRGGYQKVTF	Primary Tumor	TRA	13	0.384615	0.538462	0.153846	0.230769	0.153846	0.0769231	0.307692	0.692308	1441.61	8.19757	0.0769231	3.67692	0.408547	0.358462	-0.823077	0.153846	3.67692	0.090388	0.0212558	5.30769	0.230769	0.307692	0.0769231
TCGA-D8-A27R	CGEPRGGYQKVTF	Primary Tumor	TRA	13	0.384615	0.538462	0.153846	0.230769	0.153846	0.0769231	0.307692	0.692308	1441.61	8.19757	0.0769231	3.67692	0.408547	0.358462	-0.823077	0.153846	3.67692	0.090388	0.0212558	5.30769	0.230769	0.307692	0.0769231
TCGA-D8-A27R	CALGGSGGSNYKLTF	Primary Tumor	TRA	15	0.6	0.666667	0.133333	0.0666667	0.0666667	0	0.0666667	0.6	1474.64	8.19745	0.0666667	4.64	0.515556	0.244667	0.14	0.133333	4.64	0.920366	0.0079798	28.3533	0.266667	0.466667	0.2
TCGA-D8-A27R	CALSEAETSGSRLTF	Primary Tumor	TRA	15	0.6	0.6	0.0666667	0.2	0.0666667	0.133333	0.2	0.733333	1571.71	4.53131	-0.0666667	4.55333	0.505926	0.29	0.0533333	0.0666667	4.55333	0.10025	0.0555527	43.24	0.2	0.266667	0.4
TCGA-D8-A27R	CILGQGGSEKLVF	Primary Tumor	TRA	13	0.384615	0.461538	0.0769231	0.153846	0.0769231	0.0769231	0.153846	0.538462	1350.58	5.99432	0	5.16923	0.574359	0.293846	0.669231	0.0769231	5.16923	0.830755	0.00395833	41.8231	0.384615	0.307692	0.230769
TCGA-D8-A27R	CILGQGGSEKLVF	Primary Tumor	TRA	13	0.384615	0.461538	0.0769231	0.153846	0.0769231	0.0769231	0.153846	0.538462	1350.58	5.99432	0	5.16923	0.574359	0.293846	0.669231	0.0769231	5.16923	0.830755	0.00395833	41.8231	0.384615	0.307692	0.230769
TCGA-D8-A27R	CAFIQYGGSQGNLIF	Primary Tumor	TRA	15	0.4	0.466667	0.2	0	0	0	0	0.466667	1617.82	5.5174	0	5.09333	0.565926	0.279333	0.593333	0.2	5.09333	-1	0	14.0533	0.4	0.333333	0.133333
TCGA-D8-A27R	CSEQGGGSNYKLTF	Primary Tumor	TRA	14	0.5	0.571429	0.142857	0.142857	0.0714286	0.0714286	0.142857	0.642857	1490.59	5.99359	0	3.77857	0.419841	0.277143	-0.721429	0.142857	3.77857	0.343039	0.0248025	57.1786	0.214286	0.428571	0.142857
TCGA-D8-A27R	CAVGLQGGNTPLVF	Primary Tumor	TRA	14	0.428571	0.714286	0.0714286	0	0	0	0.0714286	0.5	1375.59	5.51813	0	5.4	0.6	0.325714	0.9	0.0714286	5.4	0.945517	0	23.1929	0.357143	0.357143	0.214286
TCGA-EW-A1J2	CAEKGENSGYSTLTF	Primary Tumor	TRA	15	0.533333	0.6	0.133333	0.2	0.0666667	0.133333	0.2	0.666667	1606.71	4.53131	-0.0666667	3.92667	0.436296	0.288667	-0.573333	0.133333	3.92667	0.696134	0.00558642	1.21333	0.2	0.333333	0.266667
TCGA-EW-A1J2	CSPHMYSGGGADGLTF	Primary Tumor	TRA	16	0.5625	0.6875	0.1875	0.0625	0	0.0625	0.125	0.6875	1599.74	5.07648	-0.0625	4.45625	0.495139	0.27875	-0.04375	0.125	4.45625	0.39778	0.00860953	64.1625	0.1875	0.4375	0.1875
TCGA-EW-A1J2	CAVYSGGSNYKLTF	Primary Tumor	TRA	14	0.5	0.642857	0.214286	0.0714286	0.0714286	0	0.0714286	0.5	1509.68	8.17523	0.0714286	4.64286	0.515873	0.272143	0.142857	0.214286	4.64286	0.945517	0.00826959	15.4643	0.357143	0.357143	0.142857
TCGA-EW-A1J2	CAVYSGGSNYKLTF	Primary Tumor	TRA	14	0.5	0.642857	0.214286	0.0714286	0.0714286	0	0.0714286	0.5	1509.68	8.17523	0.0714286	4.64286	0.515873	0.272143	0.142857	0.214286	4.64286	0.945517	0.00826959	15.4643	0.357143	0.357143	0.142857
TCGA-EW-A1J2	CAVYSGGSNYKLTF	Primary Tumor	TRA	14	0.5	0.642857	0.214286	0.0714286	0.0714286	0	0.0714286	0.5	1509.68	8.17523	0.0714286	4.64286	0.515873	0.272143	0.142857	0.214286	4.64286	0.945517	0.00826959	15.4643	0.357143	0.357143	0.142857
TCGA-EW-A1J2	CIVRVTDSNYQLIW	Primary Tumor	TRA	14	0.214286	0.5	0.142857	0.142857	0.0714286	0.0714286	0.142857	0.357143	1709.96	5.82867	0	4.85714	0.539683	0.327857	0.357143	0.142857	4.85714	0.560011	0.0161728	10.9143	0.5	0.142857	0.0714286
TCGA-EW-A1J2	CIVRVTDSNYQLIW	Primary Tumor	TRA	14	0.214286	0.5	0.142857	0.142857	0.0714286	0.0714286	0.142857	0.357143	1709.96	5.82867	0	4.85714	0.539683	0.327857	0.357143	0.142857	4.85714	0.560011	0.0161728	10.9143	0.5	0.142857	0.0714286
TCGA-EW-A1J2	CIVRVTDSNYQLIW	Primary Tumor	TRA	14	0.214286	0.5	0.142857	0.142857	0.0714286	0.0714286	0.142857	0.357143	1709.96	5.82867	0	4.85714	0.539683	0.327857	0.357143	0.142857	4.85714	0.560011	0.0161728	10.9143	0.5	0.142857	0.0714286
TCGA-EW-A1J2	CIVRVTDSNYQLIW	Primary Tumor	TRA	14	0.214286	0.5	0.142857	0.142857	0.0714286	0.0714286	0.142857	0.357143	1709.96	5.82867	0	4.85714	0.539683	0.327857	0.357143	0.142857	4.85714	0.560011	0.0161728	10.9143	0.5	0.142857	0.0714286
TCGA-EW-A1J2	CTSVQGEGDGTASKLTF	Primary Tumor	TRA	17	0.588235	0.705882	0.0588235	0.176471	0.0588235	0.117647	0.176471	0.764706	1700.82	4.37018	-0.0588235	4.25294	0.472549	0.297647	-0.247059	0.0588235	4.25294	0.277845	0.0485808	21.4235	0.176471	0.294118	0.176471
TCGA-EW-A1J2	CAGANRDDKIIF	Primary Tumor	TRA	12	0.333333	0.583333	0.0833333	0.333333	0.166667	0.166667	0.333333	0.583333	1322.49	5.95343	0	4.38333	0.487037	0.323333	-0.116667	0.0833333	4.38333	0.187383	0.0054806	-12.0583	0.25	0.166667	0.166667
TCGA-S3-AA17	CVPTKGFWGLCLTAQLFF	Primary Tumor	TRA	18	0.388889	0.5	0.222222	0.0555556	0.0555556	0	0.111111	0.444444	2031.44	8.05841	0.0555556	5.53889	0.615432	0.318333	1.03889	0.222222	5.53889	0.904332	0.00804165	16.1778	0.444444	0.166667	0.222222
TCGA-S3-AA17	CAAGGDAGGTSYGKLTF	Primary Tumor	TRA	17	0.705882	0.764706	0.117647	0.117647	0.0588235	0.0588235	0.117647	0.764706	1575.7	5.82794	0	4.59412	0.510458	0.259412	0.0941176	0.117647	4.59412	0.352029	0.0254202	11.2118	0.176471	0.352941	0.235294
TCGA-S3-AA17	CAAGGDAGGTSYGKLTF	Primary Tumor	TRA	17	0.705882	0.764706	0.117647	0.117647	0.0588235	0.0588235	0.117647	0.764706	1575.7	5.82794	0	4.59412	0.510458	0.259412	0.0941176	0.117647	4.59412	0.352029	0.0254202	11.2118	0.176471	0.352941	0.235294
TCGA-S3-AA17	CAYRSAGVDQFYF	Primary Tumor	TRA	13	0.384615	0.538462	0.307692	0.153846	0.0769231	0.0769231	0.153846	0.538462	1526.67	5.82794	0	4.54615	0.505128	0.292308	0.0461538	0.307692	4.54615	0.0709504	0.0321528	37.7392	0.384615	0.153846	0.153846
TCGA-S3-AA17	CAVPGANNLFF	Primary Tumor	TRA	11	0.363636	0.727273	0.181818	0	0	0	0.0909091	0.363636	1152.32	5.51813	0	5.47273	0.608081	0.33	0.972727	0.181818	5.47273	0.830136	0	18.8818	0.363636	0.363636	0.272727
TCGA-S3-AA17	CALRGRGTDKLIF	Primary Tumor	TRA	13	0.384615	0.461538	0.0769231	0.307692	0.230769	0.0769231	0.307692	0.615385	1449.72	9.50409	0.153846	4.6	0.511111	0.296923	0.1	0.0769231	4.6	0.0307751	0.0327114	-8.60769	0.307692	0.153846	0.230769
TCGA-S3-AA17	CVVHQAGTALIF	Primary Tumor	TRA	12	0.416667	0.583333	0.166667	0	0	0	0	0.5	1258.49	6.73187	0	5.98333	0.664815	0.3125	1.48333	0.0833333	5.98333	-1	0	-4.19167	0.416667	0.0833333	0.25
TCGA-S3-AA17	CVVHQAGTALIF	Primary Tumor	TRA	12	0.416667	0.583333	0.166667	0	0	0	0	0.5	1258.49	6.73187	0	5.98333	0.664815	0.3125	1.48333	0.0833333	5.98333	-1	0	-4.19167	0.416667	0.0833333	0.25
TCGA-B6-A0IM	CAASLNDMRF	Primary Tumor	TRA	10	0.4	0.6	0.1	0.2	0.1	0.1	0.2	0.5	1127.29	5.82941	0	4.73	0.525556	0.295	0.23	0.1	4.73	0.509756	0.0122222	1.46	0.2	0.2	0.4
TCGA-B6-A0IM	CAASAFSGANNLFF	Primary Tumor	TRA	14	0.571429	0.714286	0.214286	0	0	0	0	0.5	1419.56	5.51813	0	5.42143	0.602381	0.259286	0.921429	0.214286	5.42143	-1	0	3.22143	0.285714	0.357143	0.357143
TCGA-B6-A0IM	CAWWGGTASKLTF	Primary Tumor	TRA	13	0.615385	0.615385	0.230769	0.0769231	0.0769231	0	0.0769231	0.615385	1427.63	8.22223	0.0769231	4.80769	0.534188	0.276923	0.307692	0.230769	4.80769	0.976728	0.00850263	7.17692	0.307692	0.230769	0.230769
TCGA-B6-A0IM	CAASAFSGANNLFF	Primary Tumor	TRA	14	0.571429	0.714286	0.214286	0	0	0	0	0.5	1419.56	5.51813	0	5.42143	0.602381	0.259286	0.921429	0.214286	5.42143	-1	0	3.22143	0.285714	0.357143	0.357143
TCGA-B6-A0IM	CLLLCSNDLNRDDKIIF	Primary Tumor	TRA	17	0.176471	0.470588	0.0588235	0.294118	0.117647	0.176471	0.294118	0.352941	1995.32	4.42889	-0.0588235	4.81176	0.534641	0.295882	0.311765	0.0588235	4.81176	0.353752	0.00866694	10.7529	0.411765	0.176471	0.235294
TCGA-A2-A25D	CAVRDYKLIF	Primary Tumor	TRA	10	0.2	0.4	0.2	0.3	0.2	0.1	0.3	0.4	1227.47	8.19733	0.1	5.14	0.571111	0.33	0.64	0.2	5.14	0.0523469	0.00314815	0.51	0.5	0	0.2
TCGA-A2-A25D	CAVSATGFQKLVF	Primary Tumor	TRA	13	0.461538	0.615385	0.153846	0.0769231	0.0769231	0	0.0769231	0.538462	1370.62	8.22223	0.0769231	5.62308	0.624786	0.317692	1.12308	0.153846	5.62308	0.976728	0.00850263	-3.83077	0.384615	0.153846	0.230769
TCGA-A2-A25D	CAERDYGGSQGNLIF	Primary Tumor	TRA	15	0.4	0.533333	0.133333	0.2	0.0666667	0.133333	0.2	0.6	1629.75	4.37018	-0.0666667	4.07333	0.452593	0.28	-0.426667	0.133333	4.07333	0.820486	0.0032211	19.08	0.266667	0.333333	0.2
TCGA-A2-A25D	CAERDYGGSQGNLIF	Primary Tumor	TRA	15	0.4	0.533333	0.133333	0.2	0.0666667	0.133333	0.2	0.6	1629.75	4.37018	-0.0666667	4.07333	0.452593	0.28	-0.426667	0.133333	4.07333	0.820486	0.0032211	19.08	0.266667	0.333333	0.2
TCGA-A2-A25D	CTTASRGNYNAGNNRKLIW	Primary Tumor	TRA	19	0.421053	0.631579	0.105263	0.157895	0.157895	0	0.157895	0.526316	2139.35	10.0536	0.157895	3.56842	0.396491	0.297895	-0.931579	0.105263	3.56842	0.491738	0.0194124	18.8947	0.210526	0.368421	0.157895
TCGA-A2-A25D	CAVRVPPGNTPLVF	Primary Tumor	TRA	14	0.285714	0.785714	0.0714286	0.0714286	0.0714286	0	0.285714	0.5	1469.75	8.24969	0.0714286	5.18571	0.57619	0.45	0.685714	0.0714286	5.18571	0.0714896	0.00826959	24.6714	0.357143	0.357143	0.142857
TCGA-A2-A25D	CAVYVYSTLTF	Primary Tumor	TRA	11	0.454545	0.636364	0.272727	0	0	0	0	0.363636	1266.46	5.51678	0	5.81818	0.646465	0.29	1.31818	0.272727	5.81818	-1	0	6.6	0.545455	0.0909091	0.181818
TCGA-A2-A25D	CAVYVYSTLTF	Primary Tumor	TRA	11	0.454545	0.636364	0.272727	0	0	0	0	0.363636	1266.46	5.51678	0	5.81818	0.646465	0.29	1.31818	0.272727	5.81818	-1	0	6.6	0.545455	0.0909091	0.181818
TCGA-A2-A25D	CIGVMLLSTSVLWRNNRLAF	Primary Tumor	TRA	20	0.3	0.5	0.1	0.1	0.1	0	0.1	0.35	2293.75	10.3519	0.1	5.375	0.597222	0.288	0.875	0.1	5.375	0.783581	0.0187037	27.51	0.45	0.25	0.3
TCGA-BH-A0BP	CCERLYNQAGTALIF	Primary Tumor	TRA	15	0.4	0.466667	0.133333	0.133333	0.0666667	0.0666667	0.133333	0.466667	1701.96	5.98737	0	4.90667	0.545185	0.305333	0.406667	0.133333	4.90667	0.999705	0.00320707	-1.35333	0.333333	0.133333	0.333333
TCGA-BH-A0BP	CAASPTGNQFYF	Primary Tumor	TRA	12	0.5	0.666667	0.25	0	0	0	0.0833333	0.583333	1305.41	5.5174	0	4.49167	0.499074	0.339167	-0.00833333	0.25	4.49167	0.954546	0	46.2342	0.25	0.333333	0.166667
TCGA-BH-A0BP	CAASPTGNQFYF	Primary Tumor	TRA	12	0.5	0.666667	0.25	0	0	0	0.0833333	0.583333	1305.41	5.5174	0	4.49167	0.499074	0.339167	-0.00833333	0.25	4.49167	0.954546	0	46.2342	0.25	0.333333	0.166667
TCGA-BH-A0BP	CAYRSANTGNQFYF	Primary Tumor	TRA	14	0.428571	0.571429	0.285714	0.0714286	0.0714286	0	0.0714286	0.5	1641.76	8.19733	0.0714286	3.94286	0.438095	0.283571	-0.557143	0.285714	3.94286	0.945517	0.00826959	22.915	0.285714	0.285714	0.142857
TCGA-A8-A091	CAYRRRGNKLVF	Primary Tumor	TRA	12	0.25	0.416667	0.166667	0.333333	0.333333	0	0.333333	0.5	1482.76	10.9164	0.333333	3.875	0.430556	0.314167	-0.625	0.166667	3.875	0.0549514	0.0384127	89.05	0.333333	0.166667	0.166667
TCGA-A8-A091	CLLLCSKGGREDMRF	Primary Tumor	TRA	15	0.333333	0.4	0.0666667	0.333333	0.2	0.133333	0.333333	0.533333	1728.07	8.05853	0.0666667	4.47333	0.497037	0.286	-0.0266667	0.0666667	4.47333	0.303477	0.0209494	32.5533	0.266667	0.2	0.333333
TCGA-A8-A08F	CALSDNYGQNFVF	Primary Tumor	TRA	13	0.307692	0.615385	0.230769	0.0769231	0	0.0769231	0.0769231	0.384615	1477.6	3.79987	-0.0769231	4.60769	0.511966	0.275385	0.107692	0.230769	4.60769	1	0.009149	-8.86154	0.384615	0.307692	0.153846
TCGA-A8-A08F	CALSDNYGQNFVF	Primary Tumor	TRA	13	0.307692	0.615385	0.230769	0.0769231	0	0.0769231	0.0769231	0.384615	1477.6	3.79987	-0.0769231	4.60769	0.511966	0.275385	0.107692	0.230769	4.60769	1	0.009149	-8.86154	0.384615	0.307692	0.153846
TCGA-A8-A08F	CALSDNYGQNFVF	Primary Tumor	TRA	13	0.307692	0.615385	0.230769	0.0769231	0	0.0769231	0.0769231	0.384615	1477.6	3.79987	-0.0769231	4.60769	0.511966	0.275385	0.107692	0.230769	4.60769	1	0.009149	-8.86154	0.384615	0.307692	0.153846
TCGA-A8-A08F	CAARVGYGQNFVF	Primary Tumor	TRA	13	0.384615	0.615385	0.230769	0.0769231	0.0769231	0	0.0769231	0.461538	1431.62	8.22198	0.0769231	5	0.555556	0.292308	0.5	0.230769	5	0.976728	0.00850263	-21.9231	0.384615	0.230769	0.153846
TCGA-A8-A08F	CNERAQGIIQGAQKLAF	Primary Tumor	TRA	17	0.352941	0.411765	0.0588235	0.176471	0.117647	0.0588235	0.176471	0.647059	1847.1	8.22223	0.0588235	4.31176	0.479085	0.354706	-0.188235	0.0588235	4.31176	0.539098	0.0109939	-5.57059	0.235294	0.176471	0.294118
TCGA-A8-A08F	CAFMKVLIQGAQKLVF	Primary Tumor	TRA	16	0.25	0.375	0.125	0.125	0.125	0	0.125	0.4375	1796.25	9.31415	0.125	5.68125	0.63125	0.353125	1.18125	0.125	5.68125	0.323482	0.00619318	-6.54375	0.4375	0.0625	0.3125
TCGA-A8-A08F	CAENNAGNMLTF	Primary Tumor	TRA	12	0.416667	0.666667	0.0833333	0.0833333	0	0.0833333	0.0833333	0.416667	1284.42	3.99969	-0.0833333	4.45833	0.49537	0.286667	-0.0416667	0.0833333	4.45833	0.977273	0.00819444	12.375	0.166667	0.333333	0.416667
TCGA-A8-A08F	CNERGPIAGNNRKLIW	Primary Tumor	TRA	16	0.25	0.5	0.0625	0.25	0.1875	0.0625	0.3125	0.5	1841.1	9.50409	0.125	3.68125	0.409028	0.35625	-0.81875	0.0625	3.68125	0.120491	0.0367472	-6.54375	0.25	0.375	0.1875
TCGA-A8-A08F	CALSDNYGQNFVF	Primary Tumor	TRA	13	0.307692	0.615385	0.230769	0.0769231	0	0.0769231	0.0769231	0.384615	1477.6	3.79987	-0.0769231	4.60769	0.511966	0.275385	0.107692	0.230769	4.60769	1	0.009149	-8.86154	0.384615	0.307692	0.153846
TCGA-A8-A08F	CATALPDAGNKLTF	Primary Tumor	TRA	14	0.5	0.714286	0.0714286	0.142857	0.0714286	0.0714286	0.214286	0.642857	1421.62	5.82867	0	4.78571	0.531746	0.350714	0.285714	0.0714286	4.78571	0.19714	0.0232593	31.2571	0.214286	0.214286	0.357143
TCGA-Z7-A8R6	CVVNIRPGGSYIPTF	Primary Tumor	TRA	15	0.333333	0.666667	0.133333	0.0666667	0.0666667	0	0.2	0.466667	1622.88	8.22198	0.0666667	5.02667	0.558519	0.38	0.526667	0.133333	5.02667	0.234711	0.00914141	60.9733	0.4	0.4	0
TCGA-Z7-A8R6	CVVNIRPGGSYIPTF	Primary Tumor	TRA	15	0.333333	0.666667	0.133333	0.0666667	0.0666667	0	0.2	0.466667	1622.88	8.22198	0.0666667	5.02667	0.558519	0.38	0.526667	0.133333	5.02667	0.234711	0.00914141	60.9733	0.4	0.4	0
TCGA-Z7-A8R6	CAGTITGNQFYF	Primary Tumor	TRA	12	0.5	0.583333	0.25	0	0	0	0	0.5	1321.46	5.5174	0	4.825	0.536111	0.275	0.325	0.25	4.825	-1	0	2.5425	0.333333	0.25	0.0833333
TCGA-AR-A252	CASLVSGTYKYIF	Primary Tumor	TRA	13	0.461538	0.538462	0.230769	0.0769231	0.0769231	0	0.0769231	0.461538	1451.68	8.17523	0.0769231	5.3	0.588889	0.292308	0.8	0.230769	5.3	0.976728	0.00850263	2.7	0.461538	0.230769	0.153846
TCGA-AR-A252	CVFGSSNTGKLIF	Primary Tumor	TRA	13	0.461538	0.615385	0.153846	0.0769231	0.0769231	0	0.0769231	0.461538	1372.59	8.22223	0.0769231	5.27692	0.586325	0.269231	0.776923	0.153846	5.27692	0.976728	0.00850263	-7.87692	0.384615	0.384615	0.0769231
TCGA-AR-A252	CAVGAGNARLMF	Primary Tumor	TRA	12	0.5	0.666667	0.0833333	0.0833333	0.0833333	0	0.0833333	0.5	1209.44	8.24969	0.0833333	5.48333	0.609259	0.285833	0.983333	0.0833333	5.48333	0.965909	0.00861111	-12.0583	0.25	0.25	0.416667
TCGA-AR-A252	CAAPFIGGGADGLTF	Primary Tumor	TRA	15	0.6	0.733333	0.133333	0.0666667	0	0.0666667	0.133333	0.666667	1396.57	3.79987	-0.0666667	5.46	0.606667	0.298	0.96	0.133333	5.46	0.24067	0.00886364	48.3733	0.266667	0.333333	0.266667
TCGA-AR-A252	CAAPFIGGGADGLTF	Primary Tumor	TRA	15	0.6	0.733333	0.133333	0.0666667	0	0.0666667	0.133333	0.666667	1396.57	3.79987	-0.0666667	5.46	0.606667	0.298	0.96	0.133333	5.46	0.24067	0.00886364	48.3733	0.266667	0.333333	0.266667
TCGA-AR-A252	CCCVLLHPERRTNTGTASKLTF	Primary Tumor	TRA	22	0.454545	0.590909	0.0909091	0.181818	0.136364	0.0454545	0.227273	0.590909	2450.86	8.70624	0.0909091	4.45455	0.494949	0.33	-0.0454545	0.0454545	4.45455	0.43274	0.0133759	22.0864	0.227273	0.181818	0.227273
TCGA-AR-A252	CAYQGAQKLVF	Primary Tumor	TRA	11	0.363636	0.454545	0.181818	0.0909091	0.0909091	0	0.0909091	0.545455	1227.43	8.19745	0.0909091	4.89091	0.543434	0.344545	0.390909	0.181818	4.89091	0.830136	0.00846167	-6.34545	0.363636	0.0909091	0.272727
TCGA-AR-A252	CAIPIWAGGTSYGKLTF	Primary Tumor	TRA	17	0.529412	0.588235	0.176471	0.0588235	0.0588235	0	0.117647	0.588235	1785.07	8.19745	0.0588235	5.12353	0.569281	0.324118	0.623529	0.176471	5.12353	0.444096	0.0073558	-6.58235	0.352941	0.294118	0.176471
TCGA-AR-A252	CAAGGGATNKLIF	Primary Tumor	TRA	13	0.615385	0.692308	0.0769231	0.0769231	0.0769231	0	0.0769231	0.615385	1222.41	8.22223	0.0769231	5.24615	0.582906	0.284615	0.746154	0.0769231	5.24615	0.976728	0.00850263	21.8077	0.230769	0.307692	0.307692
TCGA-AR-A252	CAVNEGWDDKIIF	Primary Tumor	TRA	13	0.230769	0.538462	0.153846	0.307692	0.0769231	0.230769	0.307692	0.461538	1509.68	4.02802	-0.153846	4.58462	0.509402	0.322308	0.0846154	0.153846	4.58462	0.0706398	0.0407622	5.66154	0.384615	0.153846	0.153846
TCGA-AR-A252	CAVNEGWDDKIIF	Primary Tumor	TRA	13	0.230769	0.538462	0.153846	0.307692	0.0769231	0.230769	0.307692	0.461538	1509.68	4.02802	-0.153846	4.58462	0.509402	0.322308	0.0846154	0.153846	4.58462	0.0706398	0.0407622	5.66154	0.384615	0.153846	0.153846
TCGA-AR-A252	CGTPVYSGSARQLTF	Primary Tumor	TRA	15	0.533333	0.666667	0.133333	0.0666667	0.0666667	0	0.133333	0.666667	1586.77	8.22198	0.0666667	4.52667	0.502963	0.330667	0.0266667	0.133333	4.52667	0.24067	0.00886364	32.5533	0.266667	0.333333	0.133333
TCGA-AR-A252	CAMREVSLDGSARQLTF	Primary Tumor	TRA	17	0.411765	0.529412	0.0588235	0.235294	0.117647	0.117647	0.235294	0.647059	1884.14	6.06329	0	4.52353	0.502614	0.313529	0.0235294	0.0588235	4.52353	0.0854483	0.0274683	23.5647	0.235294	0.176471	0.352941
TCGA-AR-A252	CAMREVSLDGSARQLTF	Primary Tumor	TRA	17	0.411765	0.529412	0.0588235	0.235294	0.117647	0.117647	0.235294	0.647059	1884.14	6.06329	0	4.52353	0.502614	0.313529	0.0235294	0.0588235	4.52353	0.0854483	0.0274683	23.5647	0.235294	0.176471	0.352941
TCGA-AR-A252	CCCVLLHPDGPPGSARQLTF	Primary Tumor	TRA	20	0.4	0.65	0.1	0.1	0.05	0.05	0.25	0.6	2114.47	6.71796	0	4.795	0.532778	0.3815	0.295	0.05	4.795	0.287611	0.0226852	25.95	0.25	0.3	0.2
TCGA-AR-A252	CCCVLLHPDGPPGSARQLTF	Primary Tumor	TRA	20	0.4	0.65	0.1	0.1	0.05	0.05	0.25	0.6	2114.47	6.71796	0	4.795	0.532778	0.3815	0.295	0.05	4.795	0.287611	0.0226852	25.95	0.25	0.3	0.2
TCGA-AR-A252	CCCVLLHPDGPPGSARQLTF	Primary Tumor	TRA	20	0.4	0.65	0.1	0.1	0.05	0.05	0.25	0.6	2114.47	6.71796	0	4.795	0.532778	0.3815	0.295	0.05	4.795	0.287611	0.0226852	25.95	0.25	0.3	0.2
TCGA-AR-A252	CCCVLLHPDGPPGSARQLTF	Primary Tumor	TRA	20	0.4	0.65	0.1	0.1	0.05	0.05	0.25	0.6	2114.47	6.71796	0	4.795	0.532778	0.3815	0.295	0.05	4.795	0.287611	0.0226852	25.95	0.25	0.3	0.2
TCGA-AC-A3TM	CAESYGSSNTGKLIF	Primary Tumor	TRA	15	0.533333	0.6	0.133333	0.133333	0.0666667	0.0666667	0.133333	0.6	1576.73	5.99359	0	4.45333	0.494815	0.281333	-0.0466667	0.133333	4.45333	0.430539	0.0224495	6.71333	0.266667	0.4	0.2
TCGA-AC-A3TM	CAESYGSSNTGKLIF	Primary Tumor	TRA	15	0.533333	0.6	0.133333	0.133333	0.0666667	0.0666667	0.133333	0.6	1576.73	5.99359	0	4.45333	0.494815	0.281333	-0.0466667	0.133333	4.45333	0.430539	0.0224495	6.71333	0.266667	0.4	0.2
TCGA-AC-A3TM	CAESYGSSNTGKLIF	Primary Tumor	TRA	15	0.533333	0.6	0.133333	0.133333	0.0666667	0.0666667	0.133333	0.6	1576.73	5.99359	0	4.45333	0.494815	0.281333	-0.0466667	0.133333	4.45333	0.430539	0.0224495	6.71333	0.266667	0.4	0.2
TCGA-AC-A3TM	CAESYGSSNTGKLIF	Primary Tumor	TRA	15	0.533333	0.6	0.133333	0.133333	0.0666667	0.0666667	0.133333	0.6	1576.73	5.99359	0	4.45333	0.494815	0.281333	-0.0466667	0.133333	4.45333	0.430539	0.0224495	6.71333	0.266667	0.4	0.2
TCGA-AC-A3TM	CAVSXGDDKIIF	Primary Tumor	TRA
TCGA-AC-A3TM	CATVPYGGATNKLIF	Primary Tumor	TRA	15	0.466667	0.666667	0.133333	0.0666667	0.0666667	0	0.133333	0.533333	1554.81	8.19745	0.0666667	5.09333	0.565926	0.344	0.593333	0.133333	5.09333	0.24067	0.0079798	19.1867	0.333333	0.266667	0.2
TCGA-AC-A3TM	CAVNNRDGKIIF	Primary Tumor	TRA	12	0.25	0.583333	0.0833333	0.25	0.166667	0.0833333	0.25	0.416667	1349.56	8.22211	0.0833333	4.58333	0.509259	0.3225	0.0833333	0.0833333	4.58333	0.201183	0.00579806	-4.98333	0.333333	0.25	0.0833333
TCGA-BH-A0BA	CAMKNSGGSNYKLTF	Primary Tumor	TRA	15	0.466667	0.6	0.133333	0.133333	0.133333	0	0.133333	0.533333	1620.85	9.1972	0.133333	4.07333	0.452593	0.290667	-0.426667	0.133333	4.07333	0.335604	0.00626263	20.1267	0.2	0.4	0.2
TCGA-BH-A0BA	CVVNRRYGGSQGNLIF	Primary Tumor	TRA	16	0.3125	0.5625	0.125	0.125	0.125	0	0.125	0.4375	1783.02	9.50409	0.125	4.45	0.494444	0.28375	-0.05	0.125	4.45	0.970425	0.0304735	44.8875	0.375	0.375	0.0625
TCGA-BH-A0BA	CAPLNTGFQKLVF	Primary Tumor	TRA	13	0.307692	0.538462	0.153846	0.0769231	0.0769231	0	0.153846	0.461538	1437.7	8.22223	0.0769231	5.12308	0.569231	0.356923	0.623077	0.153846	5.12308	0.233903	0.00850263	4.45385	0.384615	0.230769	0.230769
TCGA-A7-A2KD	CAETPSSSNTGKLIF	Primary Tumor	TRA	15	0.533333	0.666667	0.0666667	0.133333	0.0666667	0.0666667	0.2	0.666667	1554.72	5.99432	0	4.41333	0.49037	0.344	-0.0866667	0.0666667	4.41333	0.266768	0.0224495	25.2133	0.2	0.4	0.2
TCGA-A7-A2KD	CALRGGSTLGRLYF	Primary Tumor	TRA	14	0.5	0.5	0.142857	0.142857	0.142857	0	0.142857	0.571429	1513.76	9.50409	0.142857	4.89286	0.543651	0.247857	0.392857	0.142857	4.89286	0.229255	0.00473268	25.7929	0.357143	0.285714	0.285714
TCGA-A7-A2KD	CAVMDSNYQLIW	Primary Tumor	TRA	12	0.25	0.5	0.166667	0.0833333	0	0.0833333	0.0833333	0.333333	1442.66	3.79987	-0.0833333	4.93333	0.548148	0.32	0.433333	0.166667	4.93333	0.954546	0.00902778	25.2167	0.416667	0.166667	0.25
TCGA-A7-A2KD	CGELHGNNRLAF	Primary Tumor	TRA	12	0.333333	0.5	0.166667	0.166667	0.0833333	0.0833333	0.166667	0.5	1330.47	6.74042	0	4.14167	0.460185	0.255833	-0.358333	0.0833333	4.14167	0.0916276	0.0313889	-12.8333	0.25	0.333333	0.333333
TCGA-B6-A0IK	CCERQGVFTNAGNNRKLIW	Primary Tumor	TRA	19	0.315789	0.526316	0.105263	0.210526	0.157895	0.0526316	0.210526	0.473684	2209.51	8.95587	0.105263	3.93684	0.437427	0.314211	-0.563158	0.105263	3.93684	0.602476	0.031344	2.76316	0.263158	0.263158	0.157895
TCGA-B6-A0IK	CAASEGTNAGKSTF	Primary Tumor	TRA	14	0.714286	0.785714	0.0714286	0.142857	0.0714286	0.0714286	0.142857	0.785714	1343.42	5.99432	0	4.21429	0.468254	0.297143	-0.285714	0.0714286	4.21429	0.115471	0.0318889	8.99286	0.0714286	0.357143	0.285714
TCGA-B6-A0IK	CNERCQGGKLIF	Primary Tumor	TRA	12	0.333333	0.416667	0.0833333	0.25	0.166667	0.0833333	0.25	0.5	1367.6	8.05853	0.0833333	4.2	0.466667	0.31	-0.3	0.0833333	4.2	0.073051	0.0203814	-0.983333	0.25	0.25	0.166667
TCGA-B6-A0IK	CNERCQGGKLIF	Primary Tumor	TRA	12	0.333333	0.416667	0.0833333	0.25	0.166667	0.0833333	0.25	0.5	1367.6	8.05853	0.0833333	4.2	0.466667	0.31	-0.3	0.0833333	4.2	0.073051	0.0203814	-0.983333	0.25	0.25	0.166667
TCGA-B6-A0IK	CAAVYLTSGTYKYIF	Primary Tumor	TRA	15	0.466667	0.533333	0.266667	0.0666667	0.0666667	0	0.0666667	0.466667	1699.96	8.15485	0.0666667	5.23333	0.581481	0.3	0.733333	0.266667	5.23333	0.920366	0.0079798	-1.35333	0.466667	0.133333	0.2
TCGA-B6-A0IK	CAYYTGGGSEKLVF	Primary Tumor	TRA	14	0.5	0.571429	0.214286	0.142857	0.0714286	0.0714286	0.142857	0.571429	1494.67	5.99286	0	4.67143	0.519048	0.275	0.171429	0.214286	4.67143	0.922771	0.00354321	31.2929	0.357143	0.285714	0.214286
TCGA-B6-A0IK	CAVNDGGTSYGKLTF	Primary Tumor	TRA	15	0.533333	0.733333	0.133333	0.133333	0.0666667	0.0666667	0.133333	0.6	1532.67	5.82794	0	4.46667	0.496296	0.271333	-0.0333333	0.133333	4.46667	0.24067	0.0288636	3.14667	0.266667	0.333333	0.133333
TCGA-B6-A0IK	CLLLCSRSGTYKYIF	Primary Tumor	TRA	15	0.4	0.4	0.2	0.133333	0.133333	0	0.133333	0.4	1767.12	8.85895	0.133333	5.16667	0.574074	0.276667	0.666667	0.2	5.16667	0.285092	0.00676768	58.6467	0.466667	0.2	0.2
TCGA-B6-A0IK	CVVSAGQAGTALIF	Primary Tumor	TRA	14	0.571429	0.714286	0.0714286	0	0	0	0	0.571429	1336.56	5.51813	0	6.04286	0.671429	0.306429	1.54286	0.0714286	6.04286	-1	0	-2.16429	0.357143	0.214286	0.285714
TCGA-E9-A1NC	CAVGESNTGKLIF	Primary Tumor	TRA	13	0.461538	0.615385	0.0769231	0.153846	0.0769231	0.0769231	0.153846	0.538462	1338.53	5.99432	0	4.99231	0.554701	0.298462	0.492308	0.0769231	4.99231	0.0709504	0.0321528	-14.4077	0.307692	0.307692	0.230769
TCGA-E9-A1NC	CAVGESNTGKLIF	Primary Tumor	TRA	13	0.461538	0.615385	0.0769231	0.153846	0.0769231	0.0769231	0.153846	0.538462	1338.53	5.99432	0	4.99231	0.554701	0.298462	0.492308	0.0769231	4.99231	0.0709504	0.0321528	-14.4077	0.307692	0.307692	0.230769
TCGA-E9-A1NC	CAVGESNTGKLIF	Primary Tumor	TRA	13	0.461538	0.615385	0.0769231	0.153846	0.0769231	0.0769231	0.153846	0.538462	1338.53	5.99432	0	4.99231	0.554701	0.298462	0.492308	0.0769231	4.99231	0.0709504	0.0321528	-14.4077	0.307692	0.307692	0.230769
TCGA-E9-A1NC	CAVGAGRDDKIIF	Primary Tumor	TRA	13	0.384615	0.615385	0.0769231	0.307692	0.153846	0.153846	0.307692	0.615385	1364.57	5.95343	0	4.95385	0.550427	0.317692	0.453846	0.0769231	4.95385	0.364939	0.00483796	-16.8923	0.307692	0.153846	0.153846
TCGA-E9-A1NC	CAVGAGRDDKIIF	Primary Tumor	TRA	13	0.384615	0.615385	0.0769231	0.307692	0.153846	0.153846	0.307692	0.615385	1364.57	5.95343	0	4.95385	0.550427	0.317692	0.453846	0.0769231	4.95385	0.364939	0.00483796	-16.8923	0.307692	0.153846	0.153846
TCGA-E9-A1NC	CAVGAGRDDKIIF	Primary Tumor	TRA	13	0.384615	0.615385	0.0769231	0.307692	0.153846	0.153846	0.307692	0.615385	1364.57	5.95343	0	4.95385	0.550427	0.317692	0.453846	0.0769231	4.95385	0.364939	0.00483796	-16.8923	0.307692	0.153846	0.153846
TCGA-E9-A1NC	CAVLTGGFKTIF	Primary Tumor	TRA	12	0.5	0.583333	0.166667	0.0833333	0.0833333	0	0.0833333	0.5	1256.51	8.22223	0.0833333	5.85833	0.650926	0.286667	1.35833	0.166667	5.85833	0.965909	0.00861111	-0.15	0.416667	0.166667	0.166667
TCGA-E9-A1NC	CAVLTGGFKTIF	Primary Tumor	TRA	12	0.5	0.583333	0.166667	0.0833333	0.0833333	0	0.0833333	0.5	1256.51	8.22223	0.0833333	5.85833	0.650926	0.286667	1.35833	0.166667	5.85833	0.965909	0.00861111	-0.15	0.416667	0.166667	0.166667
TCGA-E9-A1NC	CAVLTGGFKTIF	Primary Tumor	TRA	12	0.5	0.583333	0.166667	0.0833333	0.0833333	0	0.0833333	0.5	1256.51	8.22223	0.0833333	5.85833	0.650926	0.286667	1.35833	0.166667	5.85833	0.965909	0.00861111	-0.15	0.416667	0.166667	0.166667
TCGA-E9-A1NC	CAVLTGGFKTIF	Primary Tumor	TRA	12	0.5	0.583333	0.166667	0.0833333	0.0833333	0	0.0833333	0.5	1256.51	8.22223	0.0833333	5.85833	0.650926	0.286667	1.35833	0.166667	5.85833	0.965909	0.00861111	-0.15	0.416667	0.166667	0.166667
TCGA-E9-A1NC	CAVLTGGFKTIF	Primary Tumor	TRA	12	0.5	0.583333	0.166667	0.0833333	0.0833333	0	0.0833333	0.5	1256.51	8.22223	0.0833333	5.85833	0.650926	0.286667	1.35833	0.166667	5.85833	0.965909	0.00861111	-0.15	0.416667	0.166667	0.166667
TCGA-E9-A1NC	CNERLISSGSARQLTF	Primary Tumor	TRA	16	0.4375	0.5	0.0625	0.1875	0.125	0.0625	0.1875	0.625	1781.99	8.24969	0.0625	4.2625	0.473611	0.300625	-0.2375	0.0625	4.2625	0.363231	0.0140325	41.1625	0.25	0.3125	0.25
TCGA-E9-A1NC	CAESFARDAGNMLTF	Primary Tumor	TRA	15	0.466667	0.6	0.133333	0.2	0.0666667	0.133333	0.2	0.6	1632.82	4.37018	-0.0666667	4.65333	0.517037	0.290667	0.153333	0.133333	4.65333	0.458249	0.00680415	24.74	0.2	0.2	0.4
TCGA-E9-A1NC	CAESFARDAGNMLTF	Primary Tumor	TRA	15	0.466667	0.6	0.133333	0.2	0.0666667	0.133333	0.2	0.6	1632.82	4.37018	-0.0666667	4.65333	0.517037	0.290667	0.153333	0.133333	4.65333	0.458249	0.00680415	24.74	0.2	0.2	0.4
TCGA-E9-A1NC	CAVGAGRDDKIIF	Primary Tumor	TRA	13	0.384615	0.615385	0.0769231	0.307692	0.153846	0.153846	0.307692	0.615385	1364.57	5.95343	0	4.95385	0.550427	0.317692	0.453846	0.0769231	4.95385	0.364939	0.00483796	-16.8923	0.307692	0.153846	0.153846
TCGA-E9-A1NC	CAVGAGRDDKIIF	Primary Tumor	TRA	13	0.384615	0.615385	0.0769231	0.307692	0.153846	0.153846	0.307692	0.615385	1364.57	5.95343	0	4.95385	0.550427	0.317692	0.453846	0.0769231	4.95385	0.364939	0.00483796	-16.8923	0.307692	0.153846	0.153846
TCGA-E9-A1NC	CAVGAGRDDKIIF	Primary Tumor	TRA	13	0.384615	0.615385	0.0769231	0.307692	0.153846	0.153846	0.307692	0.615385	1364.57	5.95343	0	4.95385	0.550427	0.317692	0.453846	0.0769231	4.95385	0.364939	0.00483796	-16.8923	0.307692	0.153846	0.153846
TCGA-D8-A27P	CAVQALDNYGQNFVF	Primary Tumor	TRA	15	0.266667	0.6	0.2	0.0666667	0	0.0666667	0.0666667	0.4	1688.86	3.79987	-0.0666667	4.81333	0.534815	0.308667	0.313333	0.2	4.81333	1	0.00914141	-6.34667	0.4	0.2	0.2
TCGA-D8-A27P	CAVQALDNYGQNFVF	Primary Tumor	TRA	15	0.266667	0.6	0.2	0.0666667	0	0.0666667	0.0666667	0.4	1688.86	3.79987	-0.0666667	4.81333	0.534815	0.308667	0.313333	0.2	4.81333	1	0.00914141	-6.34667	0.4	0.2	0.2
TCGA-D8-A27P	CAVQALDNYGQNFVF	Primary Tumor	TRA	15	0.266667	0.6	0.2	0.0666667	0	0.0666667	0.0666667	0.4	1688.86	3.79987	-0.0666667	4.81333	0.534815	0.308667	0.313333	0.2	4.81333	1	0.00914141	-6.34667	0.4	0.2	0.2
TCGA-D8-A27P	CAVQALDNYGQNFVF	Primary Tumor	TRA	15	0.266667	0.6	0.2	0.0666667	0	0.0666667	0.0666667	0.4	1688.86	3.79987	-0.0666667	4.81333	0.534815	0.308667	0.313333	0.2	4.81333	1	0.00914141	-6.34667	0.4	0.2	0.2
TCGA-E2-A153	CAASDTGGFKTIF	Primary Tumor	TRA	13	0.615385	0.692308	0.153846	0.153846	0.0769231	0.0769231	0.153846	0.692308	1317.47	5.82867	0	4.94615	0.549573	0.286154	0.446154	0.153846	4.94615	0.0709504	0.0321528	-10.9308	0.230769	0.230769	0.153846
TCGA-AN-A0FD	CAVYQGGSEKLVF	Primary Tumor	TRA	13	0.384615	0.538462	0.153846	0.153846	0.0769231	0.0769231	0.153846	0.538462	1400.6	5.99359	0	4.92308	0.547009	0.313077	0.423077	0.153846	4.92308	0.830755	0.00395833	21.2077	0.384615	0.230769	0.230769
TCGA-AN-A0FD	CVVNDNMDSSYKLIF	Primary Tumor	TRA	15	0.2	0.6	0.133333	0.2	0.0666667	0.133333	0.2	0.333333	1747.99	4.20782	-0.0666667	4.70667	0.522963	0.308	0.206667	0.133333	4.70667	0.10025	0.0442733	24.3267	0.4	0.266667	0.133333
TCGA-BH-A0BZ	CALGEVGNDMRF	Primary Tumor	TRA	12	0.333333	0.583333	0.0833333	0.25	0.0833333	0.166667	0.25	0.5	1311.49	4.37018	-0.0833333	4.6	0.511111	0.284167	0.1	0.0833333	4.6	0.073051	0.0356063	-17.55	0.25	0.25	0.333333
TCGA-BH-A0BZ	CVVSGDSSYKLIF	Primary Tumor	TRA	13	0.384615	0.615385	0.153846	0.153846	0.0769231	0.0769231	0.153846	0.461538	1417.63	5.82794	0	5.30769	0.589744	0.291538	0.807692	0.153846	5.30769	0.214446	0.0259722	26.5308	0.461538	0.307692	0.0769231
TCGA-BH-A0BZ	CVVSDNSGNTPLVF	Primary Tumor	TRA	14	0.357143	0.857143	0.0714286	0.0714286	0	0.0714286	0.142857	0.428571	1451.6	3.79987	-0.0714286	4.99286	0.554762	0.328571	0.492857	0.0714286	4.99286	0.115471	0.00906148	-8.22857	0.357143	0.428571	0.0714286
TCGA-BH-A0BZ	CAASIGGQNFFF	Primary Tumor	TRA	12	0.5	0.583333	0.25	0	0	0	0	0.5	1261.4	5.51813	0	5.36667	0.596296	0.265833	0.866667	0.25	5.36667	-1	0	6.925	0.333333	0.333333	0.166667
TCGA-BH-A0BZ	CAVSERGSNSGYALNF	Primary Tumor	TRA	16	0.5	0.6875	0.125	0.125	0.0625	0.0625	0.125	0.5625	1674.79	5.9942	0	4.3375	0.481944	0.2725	-0.1625	0.125	4.3375	0.970425	0.00459596	16.2063	0.25	0.4375	0.25
TCGA-BH-A0BZ	CAAPNQAGTALIF	Primary Tumor	TRA	13	0.538462	0.692308	0.0769231	0	0	0	0.0769231	0.615385	1276.46	5.51813	0	5.35385	0.594872	0.367692	0.853846	0.0769231	5.35385	0.976728	0	11.7154	0.230769	0.230769	0.384615
TCGA-BH-A0BZ	CATGITGGGNKLTF	Primary Tumor	TRA	14	0.642857	0.714286	0.0714286	0.0714286	0.0714286	0	0.0714286	0.642857	1339.52	8.22223	0.0714286	4.80714	0.534127	0.266429	0.307143	0.0714286	4.80714	0.945517	0.00826959	22.3214	0.214286	0.357143	0.142857
TCGA-BH-A0BZ	CALHTNNNDMRF	Primary Tumor	TRA	12	0.25	0.583333	0.166667	0.166667	0.0833333	0.0833333	0.166667	0.416667	1435.59	6.73529	0	3.7	0.411111	0.283333	-0.8	0.0833333	3.7	0.738051	0.00896825	-15.925	0.166667	0.25	0.25
TCGA-BH-A0BZ	CAIGGNQFYF	Primary Tumor	TRA	10	0.4	0.5	0.3	0	0	0	0	0.4	1119.25	5.5174	0	5.03	0.558889	0.266	0.53	0.3	5.03	-1	0	30.371	0.4	0.3	0.1
TCGA-BH-A0BZ	CAVYPGANNLFF	Primary Tumor	TRA	12	0.333333	0.666667	0.25	0	0	0	0.0833333	0.333333	1315.5	5.5174	0	5.28333	0.587037	0.323333	0.783333	0.25	5.28333	0.954546	0	6.09167	0.416667	0.333333	0.25
TCGA-BH-A0BZ	CCEREYGNKLVF	Primary Tumor	TRA	12	0.25	0.416667	0.166667	0.333333	0.166667	0.166667	0.333333	0.416667	1460.68	6.12836	0	4.1	0.455556	0.310833	-0.4	0.166667	4.1	0.0848758	0.0131834	7.675	0.333333	0.166667	0.25
TCGA-BH-A0BZ	CAVNAGGTSYGKLTF	Primary Tumor	TRA	15	0.6	0.733333	0.133333	0.0666667	0.0666667	0	0.0666667	0.6	1488.66	8.19745	0.0666667	4.82	0.535556	0.276	0.32	0.133333	4.82	0.920366	0.0079798	3.14667	0.266667	0.333333	0.2
TCGA-BH-A0BZ	CAVNAGGTSYGKLTF	Primary Tumor	TRA	15	0.6	0.733333	0.133333	0.0666667	0.0666667	0	0.0666667	0.6	1488.66	8.19745	0.0666667	4.82	0.535556	0.276	0.32	0.133333	4.82	0.920366	0.0079798	3.14667	0.266667	0.333333	0.2
TCGA-BH-A0BZ	CAVNAGGTSYGKLTF	Primary Tumor	TRA	15	0.6	0.733333	0.133333	0.0666667	0.0666667	0	0.0666667	0.6	1488.66	8.19745	0.0666667	4.82	0.535556	0.276	0.32	0.133333	4.82	0.920366	0.0079798	3.14667	0.266667	0.333333	0.2
TCGA-BH-A0BZ	CAVRLAYGNKLVF	Primary Tumor	TRA	13	0.307692	0.538462	0.153846	0.153846	0.153846	0	0.153846	0.384615	1453.75	9.31244	0.153846	5.36923	0.596581	0.308462	0.869231	0.153846	5.36923	0.0968171	0.00234385	7.85385	0.461538	0.153846	0.307692
TCGA-BH-A0BZ	CAVRLAYGNKLVF	Primary Tumor	TRA	13	0.307692	0.538462	0.153846	0.153846	0.153846	0	0.153846	0.384615	1453.75	9.31244	0.153846	5.36923	0.596581	0.308462	0.869231	0.153846	5.36923	0.0968171	0.00234385	7.85385	0.461538	0.153846	0.307692
TCGA-BH-A0BZ	CATDGNNNDMRF	Primary Tumor	TRA	12	0.333333	0.75	0.0833333	0.25	0.0833333	0.166667	0.25	0.5	1357.43	4.20782	-0.0833333	3.325	0.369444	0.2825	-1.175	0.0833333	3.325	0.0711232	0.0235097	-4.19167	0.0833333	0.333333	0.166667
TCGA-BH-A0BZ	CATDRFSGTYKYIF	Primary Tumor	TRA	14	0.428571	0.5	0.285714	0.214286	0.142857	0.0714286	0.214286	0.571429	1671.87	8.17511	0.0714286	4.30714	0.478571	0.292857	-0.192857	0.285714	4.30714	0.163533	0.0136974	-2.16429	0.357143	0.142857	0.0714286
TCGA-BH-A0BZ	CRHLLLCWAGGTYKYIF	Primary Tumor	TRA	17	0.352941	0.352941	0.294118	0.117647	0.117647	0	0.117647	0.411765	2044.44	8.8598	0.117647	5.02353	0.55817	0.271765	0.523529	0.235294	5.02353	0.560947	0.00935239	28.0941	0.470588	0.117647	0.235294
TCGA-BH-A0BZ	CSSLSGSSNTGKLIF	Primary Tumor	TRA	15	0.6	0.666667	0.0666667	0.0666667	0.0666667	0	0.0666667	0.6	1500.67	8.22223	0.0666667	4.8	0.533333	0.26	0.3	0.0666667	4.8	0.920366	0.0079798	12.3733	0.266667	0.533333	0.133333
TCGA-BH-A0BZ	CAVEDRSYGGATNKLIF	Primary Tumor	TRA	17	0.411765	0.588235	0.117647	0.235294	0.117647	0.117647	0.235294	0.588235	1844.05	6.06183	0	4.43529	0.49281	0.304706	-0.0647059	0.117647	4.43529	0.371641	0.0206604	39.5176	0.294118	0.235294	0.235294
TCGA-BH-A0BZ	CAVEDRSYGGATNKLIF	Primary Tumor	TRA	17	0.411765	0.588235	0.117647	0.235294	0.117647	0.117647	0.235294	0.588235	1844.05	6.06183	0	4.43529	0.49281	0.304706	-0.0647059	0.117647	4.43529	0.371641	0.0206604	39.5176	0.294118	0.235294	0.235294
TCGA-BH-A0BZ	CARPSGAGSYQLTF	Primary Tumor	TRA	14	0.571429	0.642857	0.142857	0.0714286	0.0714286	0	0.142857	0.714286	1457.61	8.22198	0.0714286	4.40714	0.489683	0.33	-0.0928571	0.142857	4.40714	0.948514	0.0074777	39.55	0.214286	0.357143	0.214286
TCGA-BH-A0BZ	CSLVAPRGYGQNFVF	Primary Tumor	TRA	15	0.333333	0.6	0.2	0.0666667	0.0666667	0	0.133333	0.466667	1657.89	8.22198	0.0666667	4.90667	0.545185	0.327333	0.406667	0.2	4.90667	0.896524	0.00914141	-9.85333	0.4	0.333333	0.133333
TCGA-BH-A0BZ	CAAGGSSARQLTF	Primary Tumor	TRA	13	0.692308	0.692308	0.0769231	0.0769231	0.0769231	0	0.0769231	0.769231	1268.4	8.24969	0.0769231	4.76154	0.52906	0.287692	0.261538	0.0769231	4.76154	1	0.009149	57.8462	0.153846	0.307692	0.307692
TCGA-BH-A0BZ	CALTPNNFNKFYF	Primary Tumor	TRA	13	0.230769	0.538462	0.307692	0.0769231	0.0769231	0	0.153846	0.307692	1578.79	8.19745	0.0769231	4.38462	0.487179	0.331538	-0.115385	0.307692	4.38462	0.0709504	0.00850263	40.9623	0.384615	0.307692	0.153846
TCGA-BH-A0BZ	CAAPNQAGTALIF	Primary Tumor	TRA	13	0.538462	0.692308	0.0769231	0	0	0	0.0769231	0.615385	1276.46	5.51813	0	5.35385	0.594872	0.367692	0.853846	0.0769231	5.35385	0.976728	0	11.7154	0.230769	0.230769	0.384615
TCGA-BH-A0BZ	CVVSASQAGTALIF	Primary Tumor	TRA	14	0.571429	0.714286	0.0714286	0	0	0	0	0.571429	1366.58	5.51813	0	6.01429	0.668254	0.314286	1.51429	0.0714286	6.01429	-1	0	11.5929	0.357143	0.214286	0.285714
TCGA-BH-A0BZ	CCELIFSGYSTLTF	Primary Tumor	TRA	14	0.5	0.5	0.214286	0.0714286	0	0.0714286	0.0714286	0.428571	1583.82	3.99957	-0.0714286	5.53571	0.615079	0.259286	1.03571	0.214286	5.53571	0.899356	0.0074777	12.0357	0.428571	0.214286	0.214286
TCGA-BH-A0BZ	CAMSPGGGNKLTF	Primary Tumor	TRA	13	0.538462	0.692308	0.0769231	0.0769231	0.0769231	0	0.153846	0.615385	1282.49	8.22223	0.0769231	4.58462	0.509402	0.320769	0.0846154	0.0769231	4.58462	0.0709504	0.00850263	110.462	0.153846	0.461538	0.230769
TCGA-BH-A0BZ	CAMSPGGGNKLTF	Primary Tumor	TRA	13	0.538462	0.692308	0.0769231	0.0769231	0.0769231	0	0.153846	0.615385	1282.49	8.22223	0.0769231	4.58462	0.509402	0.320769	0.0846154	0.0769231	4.58462	0.0709504	0.00850263	110.462	0.153846	0.461538	0.230769
TCGA-BH-A0BZ	CAMSPGGGNTLTF	Primary Tumor	TRA	13	0.615385	0.769231	0.0769231	0	0	0	0.0769231	0.615385	1255.42	5.51813	0	4.83077	0.536752	0.302308	0.330769	0.0769231	4.83077	1	0	92.2462	0.153846	0.461538	0.230769
TCGA-A8-A07J	CAADRGQNFVF	Primary Tumor	TRA	11	0.363636	0.636364	0.181818	0.181818	0.0909091	0.0909091	0.181818	0.545455	1227.35	5.82941	0	4.54545	0.505051	0.302727	0.0454545	0.181818	4.54545	0.562986	0.00517196	-26.8636	0.272727	0.181818	0.181818
TCGA-A8-A07J	CAADHGQNFVF	Primary Tumor	TRA	11	0.363636	0.636364	0.272727	0.0909091	0	0.0909091	0.0909091	0.545455	1208.3	5.07648	-0.0909091	4.66364	0.518182	0.286364	0.163636	0.181818	4.66364	0.830136	0.00846167	-21.7182	0.272727	0.181818	0.181818
TCGA-A8-A07J	CAADHGQNFVF	Primary Tumor	TRA	11	0.363636	0.636364	0.272727	0.0909091	0	0.0909091	0.0909091	0.545455	1208.3	5.07648	-0.0909091	4.66364	0.518182	0.286364	0.163636	0.181818	4.66364	0.830136	0.00846167	-21.7182	0.272727	0.181818	0.181818
TCGA-A8-A07J	CAVPLGAGSYQLSF	Primary Tumor	TRA	14	0.5	0.642857	0.142857	0	0	0	0.0714286	0.571429	1412.61	5.5174	0	5.35	0.594444	0.325	0.85	0.142857	5.35	0.945517	0	16.9786	0.357143	0.357143	0.285714
TCGA-A8-A07J	CAGRLFGNEKLTF	Primary Tumor	TRA	13	0.384615	0.461538	0.153846	0.230769	0.153846	0.0769231	0.230769	0.538462	1455.68	8.22223	0.0769231	4.54615	0.505128	0.280769	0.0461538	0.153846	4.54615	0.0869945	0.0125253	5.66154	0.307692	0.230769	0.307692
TCGA-A7-A3J1	CAGGDDKIIF	Primary Tumor	TRA	10	0.4	0.6	0.1	0.3	0.1	0.2	0.3	0.6	1038.17	4.20782	-0.1	4.94	0.548889	0.299	0.44	0.1	4.94	0.059293	0.0230864	4.36	0.3	0.2	0.1
TCGA-A7-A3J1	CAFMKHSGSEKLVF	Primary Tumor	TRA	14	0.357143	0.428571	0.214286	0.214286	0.142857	0.0714286	0.214286	0.571429	1583.87	8.20673	0.0714286	4.73571	0.52619	0.307143	0.235714	0.142857	4.73571	0.0999659	0.0141189	16.9786	0.285714	0.214286	0.285714
TCGA-OL-A66I	CAVREESGNTGKLIF	Primary Tumor	TRA	15	0.4	0.533333	0.0666667	0.266667	0.133333	0.133333	0.266667	0.6	1623.83	6.13605	0	4.39333	0.488148	0.312	-0.106667	0.0666667	4.39333	0.16063	0.030087	15.6067	0.266667	0.266667	0.266667
TCGA-OL-A66I	CALVEYGGATNKLIF	Primary Tumor	TRA	15	0.4	0.533333	0.133333	0.133333	0.0666667	0.0666667	0.133333	0.466667	1598.86	5.99359	0	5.26667	0.585185	0.3	0.766667	0.133333	5.26667	0.24067	0.0288636	6.34667	0.4	0.2	0.333333
TCGA-OL-A66I	CAVTPGNTGKLIF	Primary Tumor	TRA	13	0.461538	0.692308	0.0769231	0.0769231	0.0769231	0	0.153846	0.538462	1320.56	8.22223	0.0769231	5.14615	0.571795	0.349231	0.646154	0.0769231	5.14615	0.0709504	0.00850263	-29.9538	0.307692	0.307692	0.153846
TCGA-OL-A66I	CAVTPGNTGKLIF	Primary Tumor	TRA	13	0.461538	0.692308	0.0769231	0.0769231	0.0769231	0	0.153846	0.538462	1320.56	8.22223	0.0769231	5.14615	0.571795	0.349231	0.646154	0.0769231	5.14615	0.0709504	0.00850263	-29.9538	0.307692	0.307692	0.153846
TCGA-OL-A66I	CAMREAGNTGKLIF	Primary Tumor	TRA	14	0.428571	0.5	0.0714286	0.214286	0.142857	0.0714286	0.214286	0.571429	1510.78	8.22223	0.0714286	4.65714	0.51746	0.311429	0.157143	0.0714286	4.65714	0.163533	0.0136974	-26.4214	0.214286	0.214286	0.357143
TCGA-OL-A66I	CAMREAGNTGKLIF	Primary Tumor	TRA	14	0.428571	0.5	0.0714286	0.214286	0.142857	0.0714286	0.214286	0.571429	1510.78	8.22223	0.0714286	4.65714	0.51746	0.311429	0.157143	0.0714286	4.65714	0.163533	0.0136974	-26.4214	0.214286	0.214286	0.357143
TCGA-OL-A66I	CATDQAGTALIF	Primary Tumor	TRA	12	0.583333	0.666667	0.0833333	0.0833333	0	0.0833333	0.0833333	0.666667	1210.36	3.79987	-0.0833333	5.35	0.594444	0.313333	0.85	0.0833333	5.35	0.965909	0.00861111	2.09167	0.25	0.0833333	0.333333
TCGA-OL-A66I	CALSGKRDDKIIF	Primary Tumor	TRA	13	0.307692	0.461538	0.0769231	0.384615	0.230769	0.153846	0.384615	0.615385	1465.72	8.19745	0.0769231	4.45385	0.494872	0.329231	-0.0461538	0.0769231	4.45385	0.324185	0.0185104	14.7154	0.307692	0.153846	0.153846
TCGA-OL-A66I	CAVHPYSGGGADGLTF	Primary Tumor	TRA	16	0.5625	0.75	0.1875	0.0625	0	0.0625	0.125	0.6875	1551.68	5.07648	-0.0625	4.7625	0.529167	0.28875	0.2625	0.125	4.7625	0.249183	0.00860953	20.1	0.25	0.375	0.1875
TCGA-OL-A66I	CAVEGGEYGNKLVF	Primary Tumor	TRA	14	0.357143	0.571429	0.142857	0.214286	0.0714286	0.142857	0.214286	0.5	1485.66	4.53131	-0.0714286	4.67143	0.519048	0.294286	0.171429	0.142857	4.67143	0.0876016	0.045611	11.4357	0.357143	0.285714	0.285714
TCGA-OL-A66I	CCAGRDTGNQFYF	Primary Tumor	TRA	13	0.461538	0.615385	0.230769	0.153846	0.0769231	0.0769231	0.153846	0.538462	1481.61	5.82184	0	4.08462	0.453846	0.270769	-0.415385	0.230769	4.08462	0.730628	0.00618056	-1.91462	0.230769	0.230769	0.0769231
TCGA-OL-A66I	CAGEQTGNQFYF	Primary Tumor	TRA	12	0.416667	0.5	0.25	0.0833333	0	0.0833333	0.0833333	0.583333	1364.44	3.99957	-0.0833333	3.925	0.436111	0.295	-0.575	0.25	3.925	0.965909	0.00861111	19.3842	0.25	0.25	0.166667
TCGA-OL-A66I	CAVHPYSGGGADGLTF	Primary Tumor	TRA	16	0.5625	0.75	0.1875	0.0625	0	0.0625	0.125	0.6875	1551.68	5.07648	-0.0625	4.7625	0.529167	0.28875	0.2625	0.125	4.7625	0.249183	0.00860953	20.1	0.25	0.375	0.1875
TCGA-OL-A66I	CIVRLSNDMRF	Primary Tumor	TRA	11	0.181818	0.454545	0.0909091	0.272727	0.181818	0.0909091	0.272727	0.363636	1353.61	8.24957	0.0909091	4.76364	0.529293	0.306364	0.263636	0.0909091	4.76364	0.0714377	0.0118298	-5.48182	0.363636	0.181818	0.181818
TCGA-OL-A66I	CIVRLSNDMRF	Primary Tumor	TRA	11	0.181818	0.454545	0.0909091	0.272727	0.181818	0.0909091	0.272727	0.363636	1353.61	8.24957	0.0909091	4.76364	0.529293	0.306364	0.263636	0.0909091	4.76364	0.0714377	0.0118298	-5.48182	0.363636	0.181818	0.181818
TCGA-OL-A66I	CAGARFTGNTGKLIF	Primary Tumor	TRA	15	0.533333	0.6	0.133333	0.133333	0.133333	0	0.133333	0.6	1555.8	9.50775	0.133333	4.86667	0.540741	0.28	0.366667	0.133333	4.86667	0.24067	0.00482323	-30.2867	0.266667	0.266667	0.2
TCGA-OL-A66I	CAVTGANNLFF	Primary Tumor	TRA	11	0.454545	0.727273	0.181818	0	0	0	0	0.363636	1156.31	5.51813	0	5.55455	0.617172	0.268182	1.05455	0.181818	5.55455	-1	0	-14.0636	0.363636	0.272727	0.272727
TCGA-OL-A66I	CGTEQGTDKLIF	Primary Tumor	TRA	12	0.416667	0.5	0.0833333	0.25	0.0833333	0.166667	0.25	0.666667	1311.46	4.37018	-0.0833333	4.25	0.472222	0.313333	-0.25	0.0833333	4.25	0.0894573	0.0240586	12.9667	0.25	0.166667	0.166667
TCGA-OL-A66I	CARDNYGQNFVF	Primary Tumor	TRA	12	0.25	0.583333	0.25	0.166667	0.0833333	0.0833333	0.166667	0.416667	1433.55	5.82867	0	3.99167	0.443519	0.29	-0.508333	0.25	3.99167	0.81048	0.00448413	-10.4333	0.333333	0.25	0.0833333
TCGA-E9-A1RG	CAGQRGTNAGKSTF	Primary Tumor	TRA	14	0.642857	0.714286	0.0714286	0.142857	0.142857	0	0.142857	0.785714	1397.52	9.50775	0.142857	3.79286	0.421429	0.297857	-0.707143	0.0714286	3.79286	0.115471	0.00277324	-10.8286	0.0714286	0.357143	0.142857
TCGA-E9-A1RG	CAGQRGTNAGKSTF	Primary Tumor	TRA	14	0.642857	0.714286	0.0714286	0.142857	0.142857	0	0.142857	0.785714	1397.52	9.50775	0.142857	3.79286	0.421429	0.297857	-0.707143	0.0714286	3.79286	0.115471	0.00277324	-10.8286	0.0714286	0.357143	0.142857
TCGA-E9-A1RG	CAGLYSGGGADGLTF	Primary Tumor	TRA	15	0.666667	0.733333	0.133333	0.0666667	0	0.0666667	0.0666667	0.666667	1388.5	3.79987	-0.0666667	5.04667	0.560741	0.226667	0.546667	0.133333	5.04667	0.982605	0.00886364	22.6933	0.266667	0.4	0.266667
TCGA-E9-A1RG	CAVRDGVGNTPLVF	Primary Tumor	TRA	14	0.357143	0.785714	0.0714286	0.142857	0.0714286	0.0714286	0.214286	0.5	1447.66	5.82941	0	5.13571	0.570635	0.337857	0.635714	0.0714286	5.13571	0.163533	0.00354321	-8.90714	0.357143	0.285714	0.142857
TCGA-S3-A6ZG	CALSAYGNNRLAF	Primary Tumor	TRA	13	0.461538	0.615385	0.153846	0.0769231	0.0769231	0	0.0769231	0.461538	1399.57	8.22198	0.0769231	4.83077	0.536752	0.273077	0.330769	0.153846	4.83077	0.976728	0.00850263	-3.83077	0.307692	0.307692	0.384615
TCGA-S3-A6ZG	CALSEARGETSGSRLTF	Primary Tumor	TRA	17	0.588235	0.588235	0.0588235	0.235294	0.117647	0.117647	0.235294	0.764706	1784.94	6.13678	0	4.25882	0.473203	0.285882	-0.241176	0.0588235	4.25882	0.0857362	0.0185229	29.9	0.176471	0.294118	0.352941
TCGA-S3-A6ZG	CALSEARGETSGSRLTF	Primary Tumor	TRA	17	0.588235	0.588235	0.0588235	0.235294	0.117647	0.117647	0.235294	0.764706	1784.94	6.13678	0	4.25882	0.473203	0.285882	-0.241176	0.0588235	4.25882	0.0857362	0.0185229	29.9	0.176471	0.294118	0.352941
TCGA-S3-A6ZG	CAVRTFSGGYNKLIF	Primary Tumor	TRA	15	0.4	0.533333	0.2	0.133333	0.133333	0	0.133333	0.466667	1675.95	9.31244	0.133333	4.96	0.551111	0.284	0.46	0.2	4.96	0.335604	0.00626263	30.2533	0.4	0.266667	0.133333
TCGA-EW-A1P8	CAAGNTPLVF	Primary Tumor	TRA	10	0.5	0.8	0.1	0	0	0	0.1	0.5	992.149	5.51813	0	5.57	0.618889	0.351	1.07	0.1	5.57	0.653974	0	-7.98	0.3	0.3	0.3
TCGA-EW-A1P8	CAAGNTPLVF	Primary Tumor	TRA	10	0.5	0.8	0.1	0	0	0	0.1	0.5	992.149	5.51813	0	5.57	0.618889	0.351	1.07	0.1	5.57	0.653974	0	-7.98	0.3	0.3	0.3
TCGA-EW-A1P8	CAAGNTPLVF	Primary Tumor	TRA	10	0.5	0.8	0.1	0	0	0	0.1	0.5	992.149	5.51813	0	5.57	0.618889	0.351	1.07	0.1	5.57	0.653974	0	-7.98	0.3	0.3	0.3
TCGA-EW-A1P8	CAAGNTPLVF	Primary Tumor	TRA	10	0.5	0.8	0.1	0	0	0	0.1	0.5	992.149	5.51813	0	5.57	0.618889	0.351	1.07	0.1	5.57	0.653974	0	-7.98	0.3	0.3	0.3
TCGA-EW-A1P8	CNERVPGKDSSYKLIF	Primary Tumor	TRA	16	0.25	0.5	0.125	0.3125	0.1875	0.125	0.375	0.5625	1856.11	8.17535	0.0625	3.88125	0.43125	0.361875	-0.61875	0.125	3.88125	0.0466508	0.0131592	34.875	0.3125	0.3125	0.125
TCGA-EW-A1P8	CNERVPGKDSSYKLIF	Primary Tumor	TRA	16	0.25	0.5	0.125	0.3125	0.1875	0.125	0.375	0.5625	1856.11	8.17535	0.0625	3.88125	0.43125	0.361875	-0.61875	0.125	3.88125	0.0466508	0.0131592	34.875	0.3125	0.3125	0.125
TCGA-EW-A1P8	CNERVPGKDSSYKLIF	Primary Tumor	TRA	16	0.25	0.5	0.125	0.3125	0.1875	0.125	0.375	0.5625	1856.11	8.17535	0.0625	3.88125	0.43125	0.361875	-0.61875	0.125	3.88125	0.0466508	0.0131592	34.875	0.3125	0.3125	0.125
TCGA-EW-A1P8	CATVGDSGYSTLTF	Primary Tumor	TRA	14	0.642857	0.785714	0.142857	0.0714286	0	0.0714286	0.0714286	0.642857	1421.53	3.79987	-0.0714286	4.91429	0.546032	0.262143	0.414286	0.142857	4.91429	1	0.00928193	19.7286	0.285714	0.285714	0.142857
TCGA-EW-A1P8	CATVGDSGYSTLTF	Primary Tumor	TRA	14	0.642857	0.785714	0.142857	0.0714286	0	0.0714286	0.0714286	0.642857	1421.53	3.79987	-0.0714286	4.91429	0.546032	0.262143	0.414286	0.142857	4.91429	1	0.00928193	19.7286	0.285714	0.285714	0.142857
TCGA-EW-A1P8	CAYRSRYNQGGKLIF	Primary Tumor	TRA	15	0.333333	0.4	0.2	0.2	0.2	0	0.2	0.533333	1776.03	9.78387	0.2	3.92	0.435556	0.302667	-0.58	0.2	3.92	0.151213	0.0111616	27.0467	0.333333	0.266667	0.133333
TCGA-EW-A1P8	CAAIRGSNYKLTF	Primary Tumor	TRA	13	0.461538	0.538462	0.153846	0.153846	0.153846	0	0.153846	0.538462	1443.67	9.31244	0.153846	4.66154	0.517949	0.303077	0.161538	0.153846	4.66154	0.0709504	0.00315048	5.66154	0.307692	0.230769	0.230769
TCGA-EW-A1P8	CAAIRGSNYKLTF	Primary Tumor	TRA	13	0.461538	0.538462	0.153846	0.153846	0.153846	0	0.153846	0.538462	1443.67	9.31244	0.153846	4.66154	0.517949	0.303077	0.161538	0.153846	4.66154	0.0709504	0.00315048	5.66154	0.307692	0.230769	0.230769
TCGA-EW-A1P8	CVVSGGADGLTF	Primary Tumor	TRA	12	0.583333	0.833333	0.0833333	0.0833333	0	0.0833333	0.0833333	0.583333	1125.25	3.79987	-0.0833333	5.59167	0.621296	0.255	1.09167	0.0833333	5.59167	0.954546	0.00902778	9.3	0.333333	0.333333	0.166667
TCGA-A2-A0YE	CCERPRARDNYGQNFVF	Primary Tumor	TRA	17	0.235294	0.529412	0.176471	0.294118	0.176471	0.117647	0.352941	0.529412	2075.29	8.05841	0.0588235	3.45882	0.384314	0.347647	-1.04118	0.176471	3.45882	0.480441	0.01852	2.47059	0.235294	0.235294	0.117647
TCGA-A2-A0YE	CALTPRGDSSYKLIF	Primary Tumor	TRA	15	0.4	0.533333	0.133333	0.2	0.133333	0.0666667	0.266667	0.6	1670.93	8.19733	0.0666667	4.61333	0.512593	0.338667	0.113333	0.133333	4.61333	0.0727767	0.0130527	18.6667	0.333333	0.266667	0.2
TCGA-AC-A3OD	CPTSGTYKYIF	Primary Tumor	TRA	11	0.454545	0.545455	0.272727	0.0909091	0.0909091	0	0.181818	0.545455	1279.46	8.17523	0.0909091	4.41818	0.490909	0.352727	-0.0818182	0.272727	4.41818	0.103023	0.00846167	18.8818	0.363636	0.272727	0
TCGA-B6-A0I6	CALSEAYGGSQGNLIF	Primary Tumor	TRA	16	0.5	0.5625	0.125	0.0625	0	0.0625	0.0625	0.5625	1629.79	3.99957	-0.0625	4.9	0.544444	0.273125	0.4	0.125	4.9	0.97589	0.00860953	30.55	0.3125	0.375	0.3125
TCGA-B6-A0I6	CCVLLHRQSRVAGTYKYIF	Primary Tumor	TRA	19	0.315789	0.421053	0.210526	0.157895	0.157895	0	0.157895	0.473684	2257.68	9.388	0.157895	4.81579	0.535088	0.312105	0.315789	0.157895	4.81579	0.27425	0.0112073	44.4368	0.421053	0.105263	0.157895
TCGA-LD-A66U	CVVAPGGYQKVTF	Primary Tumor	TRA	13	0.384615	0.692308	0.153846	0.0769231	0.0769231	0	0.153846	0.538462	1368.6	8.19745	0.0769231	5.10769	0.567521	0.375385	0.607692	0.153846	5.10769	0.0709504	0.00850263	17.6385	0.384615	0.230769	0.0769231
TCGA-LD-A66U	CIPCGQEGNRKFTF	Primary Tumor	TRA	14	0.357143	0.5	0.142857	0.214286	0.142857	0.0714286	0.285714	0.571429	1599.83	8.05853	0.0714286	4.00714	0.445238	0.355	-0.492857	0.142857	4.00714	0.0635099	0.0402826	18.35	0.214286	0.285714	0.0714286
TCGA-5L-AAT1	CSGVIQGAQKLVF	Primary Tumor	TRA	13	0.384615	0.538462	0.0769231	0.0769231	0.0769231	0	0.0769231	0.538462	1349.6	8.22223	0.0769231	5.36923	0.596581	0.332308	0.869231	0.0769231	5.36923	0.976728	0.00850263	-3.83077	0.384615	0.230769	0.153846
TCGA-5L-AAT1	CAFDRGSTLGRLYF	Primary Tumor	TRA	14	0.428571	0.5	0.214286	0.214286	0.142857	0.0714286	0.214286	0.571429	1605.81	8.22186	0.0714286	4.6	0.511111	0.255	0.1	0.214286	4.6	0.163533	0.0136974	6.65	0.357143	0.214286	0.214286
TCGA-5L-AAT1	CAFDRGSTLGRLYF	Primary Tumor	TRA	14	0.428571	0.5	0.214286	0.214286	0.142857	0.0714286	0.214286	0.571429	1605.81	8.22186	0.0714286	4.6	0.511111	0.255	0.1	0.214286	4.6	0.163533	0.0136974	6.65	0.357143	0.214286	0.214286
TCGA-5L-AAT1	CAYRSGGDFGNEKLTF	Primary Tumor	TRA	16	0.4375	0.5625	0.1875	0.25	0.125	0.125	0.25	0.625	1764.91	6.06183	0	3.925	0.436111	0.270625	-0.575	0.1875	3.925	0.0768958	0.026908	26.3687	0.25	0.3125	0.1875
TCGA-5L-AAT1	CAMRGIQGGSEKLVF	Primary Tumor	TRA	15	0.4	0.466667	0.0666667	0.2	0.133333	0.0666667	0.2	0.6	1595.88	8.22223	0.0666667	4.77333	0.53037	0.312667	0.273333	0.0666667	4.77333	0.290505	0.0126571	8.39333	0.266667	0.266667	0.266667
TCGA-5L-AAT1	CCERGHGSSNTGKLIF	Primary Tumor	TRA	16	0.5	0.5625	0.125	0.1875	0.125	0.0625	0.1875	0.625	1708.92	8.06818	0.0625	4.125	0.458333	0.27	-0.375	0.0625	4.125	0.472249	0.0117661	-11.6	0.1875	0.375	0.125
TCGA-5L-AAT1	CLVGDSGNTPLVF	Primary Tumor	TRA	13	0.384615	0.769231	0.0769231	0.0769231	0	0.0769231	0.153846	0.461538	1321.5	3.79987	-0.0769231	5.3	0.588889	0.313077	0.8	0.0769231	5.3	0.0709504	0.009149	19.2692	0.384615	0.384615	0.153846
TCGA-5L-AAT1	CNATDSWGKLQF	Primary Tumor	TRA	12	0.416667	0.583333	0.166667	0.166667	0.0833333	0.0833333	0.166667	0.583333	1369.5	5.82867	0	3.975	0.441667	0.3025	-0.525	0.166667	3.975	0.119457	0.0274206	23.3083	0.25	0.25	0.166667
TCGA-5L-AAT1	CAASMLTDYKLSF	Primary Tumor	TRA	13	0.461538	0.538462	0.153846	0.153846	0.0769231	0.0769231	0.153846	0.538462	1449.69	5.82794	0	5.06923	0.563248	0.300769	0.569231	0.153846	5.06923	0.649958	0.0101389	2.7	0.307692	0.153846	0.384615
TCGA-E2-A15P	CLLPLCCERWSGATNKLIF	Primary Tumor	TRA	19	0.368421	0.473684	0.105263	0.157895	0.105263	0.0526316	0.210526	0.421053	2167.62	7.95795	0.0526316	5.13158	0.570175	0.326842	0.631579	0.105263	5.13158	0.227389	0.0116035	55.5105	0.368421	0.210526	0.315789
TCGA-E2-A15P	CSECPTMNRDDKIIF	Primary Tumor	TRA	15	0.266667	0.533333	0.0666667	0.333333	0.133333	0.2	0.4	0.533333	1772.03	4.55804	-0.0666667	4.04667	0.44963	0.373333	-0.453333	0.0666667	4.04667	0.0290486	0.0115504	52.9867	0.2	0.2	0.133333
TCGA-E2-A15P	CAVSGPGGSEKLVF	Primary Tumor	TRA	14	0.5	0.714286	0.0714286	0.142857	0.0714286	0.0714286	0.214286	0.642857	1350.54	5.99432	0	5.03571	0.559524	0.332857	0.535714	0.0714286	5.03571	0.191626	0.00354321	25.7929	0.285714	0.428571	0.214286
TCGA-E2-A15P	CAVSGPGGSEKLVF	Primary Tumor	TRA	14	0.5	0.714286	0.0714286	0.142857	0.0714286	0.0714286	0.214286	0.642857	1350.54	5.99432	0	5.03571	0.559524	0.332857	0.535714	0.0714286	5.03571	0.191626	0.00354321	25.7929	0.285714	0.428571	0.214286
TCGA-E2-A15P	CRLSYLPLCARPGGGNQFYF	Primary Tumor	TRA	20	0.35	0.5	0.2	0.1	0.1	0	0.2	0.5	2262.61	8.90265	0.1	4.5	0.5	0.331	0	0.2	4.5	0.395321	0.00851852	45.6155	0.35	0.35	0.2
TCGA-E2-A15P	CIVRASYNNNDMRF	Primary Tumor	TRA	14	0.214286	0.571429	0.142857	0.214286	0.142857	0.0714286	0.214286	0.357143	1702.91	8.22186	0.0714286	3.97143	0.44127	0.306429	-0.528571	0.142857	3.97143	0.271444	0.0163235	-2.16429	0.285714	0.285714	0.142857
TCGA-E2-A15P	CRRPGYALNF	Primary Tumor	TRA	10	0.3	0.5	0.2	0.2	0.2	0	0.3	0.5	1196.38	9.50409	0.2	4.01	0.445556	0.344	-0.49	0.2	4.01	0.624113	0.0283333	85.7	0.3	0.3	0.2
TCGA-E2-A15P	CGYHMDSNYQLIW	Primary Tumor	TRA	13	0.230769	0.384615	0.307692	0.0769231	0	0.0769231	0.0769231	0.384615	1629.81	5.07648	-0.0769231	4.06154	0.451282	0.281538	-0.438462	0.230769	4.06154	0.995249	0.00928254	27.0077	0.384615	0.230769	0.153846
TCGA-E9-A5FL	CAVGRAGANNLFF	Primary Tumor	TRA	13	0.461538	0.692308	0.153846	0.0769231	0.0769231	0	0.0769231	0.461538	1339.52	8.24969	0.0769231	5.20769	0.578632	0.27	0.707692	0.153846	5.20769	1	0.009149	-3.83077	0.307692	0.307692	0.307692
TCGA-E9-A5FL	CALSEAYVNNAGNMLTF	Primary Tumor	TRA	17	0.411765	0.647059	0.117647	0.0588235	0	0.0588235	0.0588235	0.411765	1818.04	3.99957	-0.0588235	4.92353	0.547059	0.29	0.423529	0.117647	4.92353	0.970683	0.0083297	23.0059	0.294118	0.294118	0.411765
TCGA-E9-A5FL	CISVLIGVTVREGGSQGNLIF	Primary Tumor	TRA	21	0.380952	0.571429	0.047619	0.0952381	0.047619	0.047619	0.0952381	0.47619	2162.51	5.99493	0	5.45714	0.606349	0.293333	0.957143	0.047619	5.45714	0.986566	0.00408905	16.4857	0.428571	0.333333	0.142857
TCGA-E9-A5FL	CTSVQCDSKGVRGSTLGRLYF	Primary Tumor	TRA	21	0.47619	0.619048	0.0952381	0.190476	0.142857	0.047619	0.190476	0.619048	2277.58	8.90265	0.0952381	4.38571	0.487302	0.289524	-0.114286	0.0952381	4.38571	0.263245	0.0232243	31.7143	0.285714	0.285714	0.0952381
TCGA-B6-A40C	CAVLFDGNTGKLIF	Primary Tumor	TRA	14	0.357143	0.571429	0.142857	0.142857	0.0714286	0.0714286	0.142857	0.428571	1497.76	5.82867	0	5.48571	0.609524	0.280714	0.985714	0.142857	5.48571	0.156361	0.0303457	-12.2214	0.428571	0.214286	0.214286
TCGA-B6-A40C	CAVWGTGANNLFF	Primary Tumor	TRA	13	0.461538	0.692308	0.230769	0	0	0	0	0.384615	1399.57	5.51813	0	5.29231	0.588034	0.256154	0.792308	0.230769	5.29231	-1	0	-18.3385	0.384615	0.307692	0.230769
TCGA-AN-A046	CAVNMNYGGATNKLIF	Primary Tumor	TRA	16	0.375	0.625	0.125	0.0625	0.0625	0	0.0625	0.375	1715.99	8.19745	0.0625	4.88125	0.542361	0.29625	0.38125	0.125	4.88125	0.90155	0.00766888	6.575	0.3125	0.3125	0.25
TCGA-AN-A046	CAVRDLISSGSARQLTF	Primary Tumor	TRA	17	0.470588	0.588235	0.0588235	0.176471	0.117647	0.0588235	0.176471	0.647059	1824.07	8.24957	0.0588235	4.83529	0.537255	0.304706	0.335294	0.0588235	4.83529	0.379541	0.0131157	39.3294	0.294118	0.235294	0.235294
TCGA-AN-A046	CTTASWVTSAYGGSQGNLIF	Primary Tumor	TRA	20	0.6	0.7	0.15	0	0	0	0	0.6	2063.25	5.5174	0	4.825	0.536111	0.2775	0.325	0.15	4.825	-1	0	24.62	0.3	0.35	0.15
TCGA-AN-A046	CAVNWNTGNQFYF	Primary Tumor	TRA	13	0.307692	0.615385	0.307692	0	0	0	0	0.307692	1563.69	5.5174	0	4.25385	0.47265	0.28	-0.246154	0.307692	4.25385	-1	0	4.63154	0.384615	0.307692	0.0769231
TCGA-AN-A046	CAVNWNTGNQFYF	Primary Tumor	TRA	13	0.307692	0.615385	0.307692	0	0	0	0	0.307692	1563.69	5.5174	0	4.25385	0.47265	0.28	-0.246154	0.307692	4.25385	-1	0	4.63154	0.384615	0.307692	0.0769231
TCGA-AN-A046	CAVGASNAGNNRKLIW	Primary Tumor	TRA	16	0.4375	0.6875	0.0625	0.125	0.125	0	0.125	0.5	1673.89	9.50775	0.125	4.4375	0.493056	0.305	-0.0625	0.0625	4.4375	1	0.0296275	-11.85	0.25	0.375	0.25
TCGA-AN-A046	CAATPDNYGQNFVF	Primary Tumor	TRA	14	0.357143	0.714286	0.214286	0.0714286	0	0.0714286	0.142857	0.5	1546.66	3.79987	-0.0714286	4.35	0.483333	0.342143	-0.15	0.214286	4.35	0.849877	0.00928193	-12.9	0.285714	0.285714	0.142857
TCGA-AN-A046	CAMREVVSSNTGQLIF	Primary Tumor	TRA	16	0.375	0.5625	0.0625	0.125	0.0625	0.0625	0.125	0.5	1755.02	5.99493	0	5	0.555556	0.318125	0.5	0.0625	5	1	0.00292929	6.0875	0.3125	0.25	0.25
TCGA-AN-A046	CAGHNNNDMRF	Primary Tumor	TRA	11	0.272727	0.636364	0.181818	0.181818	0.0909091	0.0909091	0.181818	0.454545	1278.38	6.73529	0	3.30909	0.367677	0.27	-1.19091	0.0909091	3.30909	0.645799	0.0103439	23.7636	0.0909091	0.363636	0.181818
TCGA-AN-A046	CILSGQGGSEKLVF	Primary Tumor	TRA	14	0.428571	0.5	0.0714286	0.142857	0.0714286	0.0714286	0.142857	0.571429	1437.66	5.99432	0	5.06429	0.562698	0.29	0.564286	0.0714286	5.06429	0.922771	0.00354321	39.55	0.357143	0.357143	0.214286
TCGA-AN-A046	CAVGHNFGNEKLTF	Primary Tumor	TRA	14	0.357143	0.571429	0.214286	0.142857	0.0714286	0.0714286	0.142857	0.5	1536.71	6.73956	0	4.41429	0.490476	0.277857	-0.0857143	0.142857	4.41429	0.922771	0.00354321	6.08571	0.285714	0.285714	0.214286
TCGA-AN-A046	CRHLLLCWPGTYKYIF	Primary Tumor	TRA	16	0.25	0.3125	0.3125	0.125	0.125	0	0.1875	0.375	2013.43	8.8598	0.125	4.86875	0.540972	0.32	0.36875	0.25	4.86875	0.208186	0.00933712	30.9062	0.5	0.125	0.1875
TCGA-AN-A046	CAAKGTGSSNTGKLIF	Primary Tumor	TRA	16	0.625	0.6875	0.0625	0.125	0.125	0	0.125	0.6875	1554.77	9.31415	0.125	4.60625	0.511806	0.293125	0.10625	0.0625	4.60625	0.39778	0.00724116	-15.7312	0.1875	0.375	0.1875
TCGA-AN-A046	CAVTRGSARQLTF	Primary Tumor	TRA	13	0.538462	0.615385	0.0769231	0.153846	0.153846	0	0.153846	0.692308	1409.61	10.3519	0.153846	4.63846	0.515385	0.314615	0.138462	0.0769231	4.63846	0.151621	0.00840155	20.4769	0.230769	0.153846	0.230769
TCGA-AN-A046	CAMREGQSSARQLTF	Primary Tumor	TRA	15	0.466667	0.466667	0.0666667	0.2	0.133333	0.0666667	0.2	0.733333	1684.89	8.24969	0.0666667	3.99333	0.443704	0.328667	-0.506667	0.0666667	3.99333	0.166153	0.0150898	67.5067	0.133333	0.2	0.333333
TCGA-AN-A046	CSKPSILTGGGNKLTF	Primary Tumor	TRA	16	0.5	0.625	0.0625	0.125	0.125	0	0.1875	0.625	1622.88	9.31415	0.125	4.51875	0.502083	0.324375	0.01875	0.0625	4.51875	0.472249	0.00828914	50.7563	0.25	0.4375	0.125
TCGA-AN-A046	CAGGLTGGGNKLTF	Primary Tumor	TRA	14	0.642857	0.714286	0.0714286	0.0714286	0.0714286	0	0.0714286	0.642857	1295.46	8.22223	0.0714286	4.77857	0.530952	0.242143	0.278571	0.0714286	4.77857	0.945517	0.00826959	43.2643	0.214286	0.428571	0.214286
TCGA-AN-A046	CAGGLTGGGNKLTF	Primary Tumor	TRA	14	0.642857	0.714286	0.0714286	0.0714286	0.0714286	0	0.0714286	0.642857	1295.46	8.22223	0.0714286	4.77857	0.530952	0.242143	0.278571	0.0714286	4.77857	0.945517	0.00826959	43.2643	0.214286	0.428571	0.214286
TCGA-E9-A5FK	CAGEQYDYKLSF	Primary Tumor	TRA	12	0.333333	0.416667	0.25	0.25	0.0833333	0.166667	0.25	0.583333	1423.55	4.37018	-0.0833333	3.89167	0.432407	0.309167	-0.608333	0.25	3.89167	0.0856921	0.0379608	25.3083	0.333333	0.166667	0.25
TCGA-E9-A5FK	CSVLLCSKGATGTASKLTF	Primary Tumor	TRA	19	0.631579	0.684211	0.0526316	0.105263	0.105263	0	0.105263	0.631579	1887.23	8.90375	0.105263	5.23158	0.581287	0.293684	0.731579	0.0526316	5.23158	0.446594	0.00783806	-6.37368	0.263158	0.263158	0.263158
TCGA-E9-A5FK	CAYKWGGSEKLVF	Primary Tumor	TRA	13	0.384615	0.461538	0.230769	0.230769	0.153846	0.0769231	0.230769	0.538462	1487.72	8.17548	0.0769231	4.5	0.5	0.304615	6.83214e-17	0.230769	4.5	0.0869945	0.0125253	19.0308	0.384615	0.230769	0.230769
TCGA-E9-A5FK	CAVRQDSGYALNF	Primary Tumor	TRA	13	0.384615	0.615385	0.153846	0.153846	0.0769231	0.0769231	0.153846	0.538462	1443.58	5.82867	0	4.45385	0.494872	0.299231	-0.0461538	0.153846	4.45385	0.649958	0.0101389	53.8	0.307692	0.230769	0.230769
TCGA-E9-A5FK	CIDQTGANNLFF	Primary Tumor	TRA	12	0.333333	0.583333	0.166667	0.0833333	0	0.0833333	0.0833333	0.416667	1342.48	3.79987	-0.0833333	4.75833	0.528704	0.284167	0.258333	0.166667	4.75833	0.977273	0.00819444	-4.98333	0.333333	0.25	0.166667
TCGA-E9-A5FK	CIDQTGANNLFF	Primary Tumor	TRA	12	0.333333	0.583333	0.166667	0.0833333	0	0.0833333	0.0833333	0.416667	1342.48	3.79987	-0.0833333	4.75833	0.528704	0.284167	0.258333	0.166667	4.75833	0.977273	0.00819444	-4.98333	0.333333	0.25	0.166667
TCGA-E9-A5FK	CALGVKNNARLMF	Primary Tumor	TRA	13	0.307692	0.538462	0.0769231	0.153846	0.153846	0	0.153846	0.384615	1436.74	9.50775	0.153846	5.02308	0.55812	0.307692	0.523077	0.0769231	5.02308	0.214446	0.00959813	7.01538	0.307692	0.230769	0.384615
TCGA-E9-A5FK	CVVIRSNDYKLSF	Primary Tumor	TRA	13	0.230769	0.538462	0.153846	0.230769	0.153846	0.0769231	0.230769	0.384615	1543.79	8.19733	0.0769231	4.78462	0.531624	0.313077	0.284615	0.153846	4.78462	0.107371	0.00968583	30.7	0.461538	0.230769	0.0769231
TCGA-E9-A5FK	CAVRMIKAAGNKLTF	Primary Tumor	TRA	15	0.4	0.533333	0.0666667	0.2	0.2	0	0.2	0.533333	1623	10.062	0.2	5.04667	0.560741	0.342	0.546667	0.0666667	5.04667	0.076513	0.00752525	16.3667	0.266667	0.133333	0.333333
TCGA-E9-A5FK	CAYRKSGGYQKVTF	Primary Tumor	TRA	14	0.428571	0.5	0.214286	0.214286	0.214286	0	0.214286	0.642857	1607.83	9.62872	0.214286	3.82857	0.425397	0.323571	-0.671429	0.214286	3.82857	0.163533	0.0130242	-3.35714	0.285714	0.214286	0.0714286
TCGA-E9-A227	CVVNSDYKLSF	Primary Tumor	TRA	11	0.272727	0.636364	0.181818	0.181818	0.0909091	0.0909091	0.181818	0.363636	1274.44	5.82794	0	4.83636	0.537374	0.3	0.336364	0.181818	4.83636	0.318621	0.0132011	-5.48182	0.454545	0.272727	0.0909091
TCGA-E9-A227	CISGGYNKLIF	Primary Tumor	TRA	11	0.363636	0.454545	0.181818	0.0909091	0.0909091	0	0.0909091	0.363636	1214.43	8.19745	0.0909091	5.20909	0.578788	0.274545	0.709091	0.181818	5.20909	0.830136	0.00846167	26.4	0.454545	0.363636	0.0909091
TCGA-E9-A227	CISGGYNKLIF	Primary Tumor	TRA	11	0.363636	0.454545	0.181818	0.0909091	0.0909091	0	0.0909091	0.363636	1214.43	8.19745	0.0909091	5.20909	0.578788	0.274545	0.709091	0.181818	5.20909	0.830136	0.00846167	26.4	0.454545	0.363636	0.0909091
TCGA-E9-A227	CALSHFGNEKLTF	Primary Tumor	TRA	13	0.384615	0.461538	0.230769	0.153846	0.0769231	0.0769231	0.153846	0.538462	1466.66	6.73956	0	4.61538	0.512821	0.275385	0.115385	0.153846	4.61538	0.830755	0.00395833	-2.31538	0.307692	0.230769	0.307692
TCGA-E9-A227	CAVSEDTDKLIF	Primary Tumor	TRA	12	0.333333	0.583333	0.0833333	0.333333	0.0833333	0.25	0.333333	0.583333	1340.5	4.02802	-0.166667	4.80833	0.534259	0.329167	0.308333	0.0833333	4.80833	0.0296929	0.0546781	14.5917	0.333333	0.0833333	0.25
TCGA-E9-A227	CVNNAGNMLTF	Primary Tumor	TRA	11	0.363636	0.727273	0.0909091	0	0	0	0	0.272727	1183.36	5.51813	0	4.99091	0.554545	0.276364	0.490909	0.0909091	4.99091	-1	0	5.73636	0.272727	0.363636	0.272727
TCGA-E9-A227	CCVLLHRQSRSNDYKLSF	Primary Tumor	TRA	18	0.277778	0.444444	0.166667	0.222222	0.166667	0.0555556	0.222222	0.5	2169.49	8.9035	0.111111	4.11667	0.457407	0.298333	-0.383333	0.111111	4.11667	0.254633	0.0240117	70.7611	0.333333	0.222222	0.166667
TCGA-E9-A227	CAVNSGGYQKVTF	Primary Tumor	TRA	13	0.461538	0.692308	0.153846	0.0769231	0.0769231	0	0.0769231	0.538462	1373.53	8.19745	0.0769231	4.57692	0.508547	0.307692	0.0769231	0.153846	4.57692	0.976728	0.00850263	8.62308	0.307692	0.307692	0.0769231
TCGA-BH-A0B7	CAVRDLSRGGYQKVTF	Primary Tumor	TRA	16	0.375	0.5625	0.125	0.25	0.1875	0.0625	0.25	0.625	1800.05	9.31073	0.125	4.2375	0.470833	0.314375	-0.2625	0.125	4.2375	0.0807968	0.0125033	15.6125	0.3125	0.1875	0.125
TCGA-BH-A0B7	CLVGDNFNKFYF	Primary Tumor	TRA	12	0.166667	0.5	0.333333	0.166667	0.0833333	0.0833333	0.166667	0.25	1466.66	5.82794	0	4.73333	0.525926	0.264167	0.233333	0.333333	4.73333	0.119457	0.0274206	52.5175	0.5	0.25	0.0833333
TCGA-BH-A0B7	CALSLSNTGNQFYF	Primary Tumor	TRA	14	0.428571	0.571429	0.214286	0	0	0	0	0.428571	1564.72	5.5174	0	4.71429	0.52381	0.263571	0.214286	0.214286	4.71429	-1	0	3.60786	0.357143	0.357143	0.214286
TCGA-BH-A0B7	CSDLNYGGSQGNLIF	Primary Tumor	TRA	15	0.4	0.6	0.133333	0.0666667	0	0.0666667	0.0666667	0.466667	1587.71	3.79987	-0.0666667	4.45333	0.494815	0.252	-0.0466667	0.133333	4.45333	0.858126	0.00709596	19.08	0.333333	0.466667	0.133333
TCGA-BH-A0B7	CALSXXXXGNQFYF	Primary Tumor	TRA
TCGA-BH-A0B7	CALSSTQGGSEKLVF	Primary Tumor	TRA	15	0.533333	0.6	0.0666667	0.133333	0.0666667	0.0666667	0.133333	0.666667	1526.71	5.99432	0	4.77333	0.53037	0.298	0.273333	0.0666667	4.77333	0.999558	0.00320707	32.5533	0.266667	0.333333	0.266667
TCGA-BH-A0B7	CAVDPKTSYDKVIF	Primary Tumor	TRA	14	0.285714	0.642857	0.142857	0.285714	0.142857	0.142857	0.357143	0.571429	1585.82	5.95197	0	4.55714	0.506349	0.392143	0.0571429	0.142857	4.55714	0.00697534	0.00417147	3.33571	0.357143	0.142857	0.0714286
TCGA-BH-A0B7	CAFWGGADGLTF	Primary Tumor	TRA	12	0.583333	0.666667	0.25	0.0833333	0	0.0833333	0.0833333	0.583333	1244.37	3.79987	-0.0833333	5.26667	0.585185	0.235833	0.766667	0.25	5.26667	0.954546	0.00902778	6.94167	0.333333	0.25	0.25
TCGA-BH-A0B7	CAASGLSGSARQLTF	Primary Tumor	TRA	15	0.666667	0.666667	0.0666667	0.0666667	0.0666667	0	0.0666667	0.733333	1468.63	8.24969	0.0666667	4.92667	0.547407	0.281333	0.426667	0.0666667	4.92667	0.982605	0.00886364	30.4	0.2	0.333333	0.333333
TCGA-BH-A0B7	CAVKTSYDKVIF	Primary Tumor	TRA	12	0.333333	0.583333	0.166667	0.25	0.166667	0.0833333	0.25	0.5	1373.62	8.17523	0.0833333	4.99167	0.55463	0.349167	0.491667	0.166667	4.99167	0.0894573	0.00883377	12.35	0.416667	0.0833333	0.0833333
TCGA-BH-A0B7	CTIASSELKTSYDKVIF	Primary Tumor	TRA	17	0.411765	0.529412	0.117647	0.235294	0.117647	0.117647	0.235294	0.588235	1905.17	6.06122	0	4.74706	0.527451	0.332353	0.247059	0.117647	4.74706	0.261173	0.0070588	50.1941	0.352941	0.176471	0.176471
TCGA-BH-A0B7	CAVNGGNKLVF	Primary Tumor	TRA	11	0.363636	0.727273	0.0909091	0.0909091	0.0909091	0	0.0909091	0.363636	1121.31	8.22223	0.0909091	5.19091	0.576768	0.288182	0.690909	0.0909091	5.19091	0.830136	0.00846167	12.7364	0.363636	0.363636	0.181818
TCGA-BH-A0B7	CRHLLLCWADQYMDSNYQLIW	Primary Tumor	TRA	21	0.190476	0.333333	0.238095	0.142857	0.047619	0.0952381	0.142857	0.380952	2672.07	5.21027	-0.047619	4.40476	0.489418	0.301429	-0.0952381	0.190476	4.40476	0.433134	0.0277918	45.2762	0.428571	0.0952381	0.285714
TCGA-BH-A0B7	CAMRYDSNYQLIW	Primary Tumor	TRA	13	0.230769	0.384615	0.230769	0.153846	0.0769231	0.0769231	0.153846	0.384615	1662.89	5.82794	0	4.13077	0.458974	0.313846	-0.369231	0.230769	4.13077	0.649958	0.0101389	30.6615	0.384615	0.153846	0.230769
TCGA-BH-A0B7	CAVNSPGNKLIF	Primary Tumor	TRA	12	0.333333	0.666667	0.0833333	0.0833333	0.0833333	0	0.166667	0.416667	1262.48	8.22223	0.0833333	4.99167	0.55463	0.356667	0.491667	0.0833333	4.99167	0.268935	0.00861111	51.3667	0.333333	0.416667	0.166667
TCGA-BH-A0B7	CAVRGARLMF	Primary Tumor	TRA	10	0.4	0.5	0.1	0.2	0.2	0	0.2	0.5	1123.4	10.3519	0.2	5.44	0.604444	0.304	0.94	0.1	5.44	0.134895	0.0122222	-7.98	0.3	0.1	0.4
TCGA-BH-A0B7	CAMRGDREAGNTPLVF	Primary Tumor	TRA	16	0.375	0.625	0.0625	0.25	0.125	0.125	0.3125	0.625	1736.97	6.06329	0	4.2625	0.473611	0.3425	-0.2375	0.0625	4.2625	0.068486	0.00557239	-15.9688	0.1875	0.25	0.3125
TCGA-BH-A0B7	CTSVLWYTREESLS	Primary Tumor	TRA	14	0.428571	0.5	0.142857	0.214286	0.0714286	0.142857	0.214286	0.571429	1673.84	4.53131	-0.0714286	4.27143	0.474603	0.3	-0.228571	0.142857	4.27143	0.653278	0.0105291	80.4643	0.357143	0.214286	0.285714
TCGA-BH-A0B7	CAVSPNSGYSTLTF	Primary Tumor	TRA	14	0.571429	0.785714	0.142857	0	0	0	0.0714286	0.571429	1446.58	5.5174	0	4.82143	0.535714	0.316429	0.321429	0.142857	4.82143	0.991678	0	43.4214	0.285714	0.428571	0.142857
TCGA-BH-A0B7	CAPAGGGNKLTF	Primary Tumor	TRA	12	0.583333	0.75	0.0833333	0.0833333	0.0833333	0	0.166667	0.666667	1135.29	8.22223	0.0833333	4.65	0.516667	0.328333	0.15	0.0833333	4.65	0.0916276	0.00861111	77.7	0.166667	0.416667	0.25
TCGA-BH-A0B7	CVVRGVENTGFQKLVF	Primary Tumor	TRA	16	0.25	0.5625	0.125	0.1875	0.125	0.0625	0.1875	0.4375	1796.1	8.22223	0.0625	5.01875	0.557639	0.320625	0.51875	0.125	5.01875	0.127974	0.0198848	-16.5625	0.4375	0.1875	0.125
TCGA-A8-A06O	CREFGPSNTGKLIF	Primary Tumor	TRA	14	0.357143	0.5	0.142857	0.214286	0.142857	0.0714286	0.285714	0.571429	1568.79	8.22223	0.0714286	4.29286	0.476984	0.333571	-0.207143	0.142857	4.29286	0.0938387	0.0136974	-1.21429	0.285714	0.357143	0.142857
TCGA-A8-A06O	CAGRESNFGNEKLTF	Primary Tumor	TRA	15	0.4	0.533333	0.133333	0.266667	0.133333	0.133333	0.266667	0.6	1672.82	6.13605	0	3.76667	0.418519	0.289333	-0.733333	0.133333	3.76667	0.130663	0.00641414	9.06	0.2	0.333333	0.266667
TCGA-A8-A06O	CAVSLNYGGSQGNLIF	Primary Tumor	TRA	16	0.4375	0.625	0.125	0	0	0	0	0.4375	1642.83	5.5174	0	5.05	0.561111	0.265	0.55	0.125	5.05	-1	0	18.5125	0.375	0.4375	0.1875
TCGA-A8-A06O	CCGGVNAGNNRKLIW	Primary Tumor	TRA	15	0.4	0.666667	0.0666667	0.133333	0.133333	0	0.133333	0.4	1604.85	8.95648	0.133333	4.38667	0.487407	0.285333	-0.113333	0.0666667	4.38667	0.999558	0.0304798	6.24	0.266667	0.4	0.133333
TCGA-C8-A12X	CAMREGDDKIIF	Primary Tumor	TRA	12	0.25	0.416667	0.0833333	0.416667	0.166667	0.25	0.416667	0.583333	1397.62	4.55817	-0.0833333	4.39167	0.487963	0.335	-0.108333	0.0833333	4.39167	0.0678997	0.00830026	-11.2667	0.25	0.0833333	0.25
TCGA-C8-A12X	CAMSPGEDDKIIF	Primary Tumor	TRA	13	0.307692	0.538462	0.0769231	0.307692	0.0769231	0.230769	0.384615	0.615385	1425.63	4.02802	-0.153846	4.56154	0.506838	0.375385	0.0615385	0.0769231	4.56154	0.103962	0.0422241	72.7846	0.230769	0.230769	0.230769
TCGA-C8-A12X	CCVLLPRPTNAGKSTF	Primary Tumor	TRA	16	0.4375	0.6875	0.0625	0.125	0.125	0	0.25	0.5625	1707.03	8.95648	0.125	4.73125	0.525694	0.383125	0.23125	0.0625	4.73125	0.149728	0.00556187	17.0375	0.25	0.3125	0.1875
TCGA-LD-A9QF	CAVANNARLMF	Primary Tumor	TRA	11	0.363636	0.636364	0.0909091	0.0909091	0.0909091	0	0.0909091	0.363636	1209.44	8.24969	0.0909091	5.32727	0.591919	0.312727	0.827273	0.0909091	5.32727	0.830136	0.00846167	9.09091	0.272727	0.181818	0.454545
TCGA-LD-A9QF	CVVNRGGTGGFKTIF	Primary Tumor	TRA	15	0.466667	0.666667	0.133333	0.133333	0.133333	0	0.133333	0.533333	1555.8	9.50775	0.133333	4.90667	0.545185	0.275333	0.406667	0.133333	4.90667	0.24067	0.00482323	-6.24	0.333333	0.333333	0
TCGA-LD-A9QF	CVVNRGGTGGFKTIF	Primary Tumor	TRA	15	0.466667	0.666667	0.133333	0.133333	0.133333	0	0.133333	0.533333	1555.8	9.50775	0.133333	4.90667	0.545185	0.275333	0.406667	0.133333	4.90667	0.24067	0.00482323	-6.24	0.333333	0.333333	0
TCGA-LD-A9QF	CAFYTGNQFYF	Primary Tumor	TRA	11	0.363636	0.454545	0.454545	0	0	0	0	0.363636	1360.49	5.51678	0	4.68182	0.520202	0.261818	0.181818	0.454545	4.68182	-1	0	31.5018	0.454545	0.181818	0.0909091
TCGA-LD-A9QF	CALEGSGNTGKLIF	Primary Tumor	TRA	14	0.5	0.571429	0.0714286	0.142857	0.0714286	0.0714286	0.142857	0.571429	1409.61	5.99432	0	4.9	0.544444	0.275714	0.4	0.0714286	4.9	0.229255	0.0283457	-21.0357	0.285714	0.357143	0.285714
TCGA-LD-A9QF	CATDRGGGADGLTF	Primary Tumor	TRA	14	0.642857	0.785714	0.0714286	0.214286	0.0714286	0.142857	0.214286	0.785714	1340.42	4.20782	-0.0714286	4.37143	0.485714	0.252857	-0.128571	0.0714286	4.37143	0.0999659	0.0141189	12.15	0.142857	0.285714	0.214286
TCGA-LD-A9QF	CAVRRGGGGSNYKLTF	Primary Tumor	TRA	16	0.5	0.625	0.125	0.1875	0.1875	0	0.1875	0.625	1685.9	10.0536	0.1875	4.14375	0.460417	0.27125	-0.35625	0.125	4.14375	0.392036	0.0191146	65.4125	0.25	0.375	0.125
TCGA-LD-A9QF	CAVRPGGGADGLTF	Primary Tumor	TRA	14	0.571429	0.785714	0.0714286	0.142857	0.0714286	0.0714286	0.214286	0.714286	1320.47	5.82941	0	4.85714	0.539683	0.307857	0.357143	0.0714286	4.85714	0.0999659	0.0318889	37.3571	0.214286	0.357143	0.214286
TCGA-LD-A9QF	CAVRPGGGADGLTF	Primary Tumor	TRA	14	0.571429	0.785714	0.0714286	0.142857	0.0714286	0.0714286	0.214286	0.714286	1320.47	5.82941	0	4.85714	0.539683	0.307857	0.357143	0.0714286	4.85714	0.0999659	0.0318889	37.3571	0.214286	0.357143	0.214286
TCGA-LD-A9QF	CCGGRTSGTYKYIF	Primary Tumor	TRA	14	0.571429	0.571429	0.214286	0.142857	0.142857	0	0.142857	0.571429	1555.78	8.85895	0.142857	4.35	0.483333	0.269286	-0.15	0.214286	4.35	0.115471	0.00277324	12.0357	0.285714	0.285714	0
TCGA-LD-A9QF	CGEREPDYKLSF	Primary Tumor	TRA	12	0.25	0.416667	0.166667	0.416667	0.166667	0.25	0.5	0.666667	1443.58	4.67914	-0.0833333	3.34167	0.371296	0.363333	-1.15833	0.166667	3.34167	0.319128	0.00835097	5.575	0.25	0.25	0.25
TCGA-LD-A9QF	CALDGGSTLGRLYF	Primary Tumor	TRA	14	0.5	0.571429	0.142857	0.142857	0.0714286	0.0714286	0.142857	0.571429	1472.66	5.82867	0	4.96429	0.551587	0.242143	0.464286	0.142857	4.96429	0.229255	0.0283457	18.1	0.357143	0.285714	0.285714
TCGA-LD-A9QF	CAVSQAGTALIF	Primary Tumor	TRA	12	0.583333	0.666667	0.0833333	0	0	0	0	0.583333	1180.37	5.51813	0	5.98333	0.664815	0.314167	1.48333	0.0833333	5.98333	-1	0	18.1417	0.333333	0.166667	0.333333
TCGA-LD-A9QF	CASMDTGRRALTF	Primary Tumor	TRA	13	0.538462	0.615385	0.0769231	0.230769	0.153846	0.0769231	0.230769	0.692308	1428.64	8.24957	0.0769231	4.46154	0.495726	0.294615	-0.0384615	0.0769231	4.46154	0.116901	0.0506337	44.6923	0.153846	0.153846	0.307692
TCGA-AR-A2LO	CAVDMVSFTPMNRDDKIIF	Primary Tumor	TRA	19	0.210526	0.578947	0.105263	0.263158	0.105263	0.157895	0.315789	0.473684	2202.57	4.42889	-0.0526316	4.79474	0.532749	0.363684	0.294737	0.105263	4.79474	0.127061	0.0107491	-11.3421	0.315789	0.157895	0.157895
TCGA-AR-A2LO	CAVDMDSFTPMNRDDKIIF	Primary Tumor	TRA	19	0.210526	0.578947	0.105263	0.315789	0.105263	0.210526	0.368421	0.526316	2218.53	4.1391	-0.105263	4.38947	0.487719	0.358947	-0.110526	0.105263	4.38947	0.037936	0.0320669	-1.20526	0.263158	0.157895	0.157895
TCGA-A8-A08H	CAVMDSNYQLIW	Primary Tumor	TRA	12	0.25	0.5	0.166667	0.0833333	0	0.0833333	0.0833333	0.333333	1442.66	3.79987	-0.0833333	4.93333	0.548148	0.32	0.433333	0.166667	4.93333	0.954546	0.00902778	25.2167	0.416667	0.166667	0.25
TCGA-A8-A08H	CAADNYGQNFVF	Primary Tumor	TRA	12	0.333333	0.666667	0.25	0.0833333	0	0.0833333	0.0833333	0.416667	1348.44	3.79987	-0.0833333	4.51667	0.501852	0.289167	0.0166667	0.25	4.51667	0.965909	0.00861111	-17.5083	0.333333	0.25	0.166667
TCGA-A8-A08H	CAVTPNAGKSTF	Primary Tumor	TRA	12	0.583333	0.833333	0.0833333	0.0833333	0.0833333	0	0.166667	0.666667	1195.35	8.22223	0.0833333	4.625	0.513889	0.365833	0.125	0.0833333	4.625	0.119457	0.00861111	5.3	0.166667	0.333333	0.166667
TCGA-A8-A08H	CAMSDGQAGTALIF	Primary Tumor	TRA	14	0.571429	0.642857	0.0714286	0.0714286	0	0.0714286	0.0714286	0.642857	1384.58	3.79987	-0.0714286	5.32857	0.592063	0.297857	0.828571	0.0714286	5.32857	0.991678	0.00906148	34.6071	0.214286	0.214286	0.357143
TCGA-A8-A08H	CAVDHDKIIF	Primary Tumor	TRA	10	0.2	0.5	0.2	0.3	0.1	0.2	0.3	0.5	1160.34	5.21063	-0.1	5.12	0.568889	0.332	0.62	0.1	5.12	0.0523469	0.0231481	-23.01	0.4	0	0.1
TCGA-A8-A08H	CIVSYNQGGKLIF	Primary Tumor	TRA	13	0.307692	0.461538	0.153846	0.0769231	0.0769231	0	0.0769231	0.384615	1441.69	8.19745	0.0769231	5.15385	0.57265	0.303077	0.653846	0.153846	5.15385	0.976728	0.00850263	-6.66923	0.461538	0.307692	0.0769231
TCGA-A8-A08H	CASHYLGYSGGSNYKLTF	Primary Tumor	TRA	18	0.5	0.555556	0.277778	0.0555556	0.0555556	0	0.0555556	0.555556	1968.15	8.16376	0.0555556	4.27222	0.474691	0.248889	-0.227778	0.222222	4.27222	0.874896	0.0070506	38.1333	0.333333	0.388889	0.166667
TCGA-A8-A08H	CASHYLGYSGGSNYKLTF	Primary Tumor	TRA	18	0.5	0.555556	0.277778	0.0555556	0.0555556	0	0.0555556	0.555556	1968.15	8.16376	0.0555556	4.27222	0.474691	0.248889	-0.227778	0.222222	4.27222	0.874896	0.0070506	38.1333	0.333333	0.388889	0.166667
TCGA-A8-A08H	CAVGAPVGNQFYF	Primary Tumor	TRA	13	0.384615	0.692308	0.230769	0	0	0	0.0769231	0.461538	1372.55	5.5174	0	5.22308	0.580342	0.34	0.723077	0.230769	5.22308	0.995249	0	26.2162	0.384615	0.307692	0.153846
TCGA-A8-A08H	CCPASSGTYKYIF	Primary Tumor	TRA	13	0.538462	0.615385	0.230769	0.0769231	0.0769231	0	0.153846	0.538462	1439.65	8.0329	0.0769231	4.75385	0.528205	0.34	0.253846	0.230769	4.75385	0.233903	0.00850263	47.1462	0.307692	0.307692	0.0769231
TCGA-A8-A08H	CAGRSGTYKYIF	Primary Tumor	TRA	12	0.5	0.5	0.25	0.166667	0.166667	0	0.166667	0.583333	1365.56	9.19598	0.166667	4.35833	0.484259	0.286667	-0.141667	0.25	4.35833	0.0470281	0.00253968	38.7083	0.333333	0.25	0.0833333
TCGA-A8-A08H	CAGRSGTYKYIF	Primary Tumor	TRA	12	0.5	0.5	0.25	0.166667	0.166667	0	0.166667	0.583333	1365.56	9.19598	0.166667	4.35833	0.484259	0.286667	-0.141667	0.25	4.35833	0.0470281	0.00253968	38.7083	0.333333	0.25	0.0833333
TCGA-A8-A08H	CCCVLLHPETRLYNTNAGKSTF	Primary Tumor	TRA	22	0.409091	0.590909	0.136364	0.136364	0.0909091	0.0454545	0.181818	0.5	2470.84	7.95929	0.0454545	4.47273	0.49697	0.321818	-0.0272727	0.0909091	4.47273	0.488647	0.0131192	3.76818	0.272727	0.227273	0.227273
TCGA-BH-A0BW	CVALQTGAGNNRKLIW	Primary Tumor	TRA	16	0.375	0.5625	0.0625	0.125	0.125	0	0.125	0.5	1744.03	9.50775	0.125	4.56875	0.507639	0.318125	0.06875	0.0625	4.56875	1	0.0296275	3.8125	0.3125	0.25	0.25
TCGA-BH-A0BW	CAATGGGNKLTF	Primary Tumor	TRA	12	0.666667	0.75	0.0833333	0.0833333	0.0833333	0	0.0833333	0.666667	1139.28	8.22223	0.0833333	4.725	0.525	0.271667	0.225	0.0833333	4.725	0.965909	0.00861111	38.525	0.166667	0.333333	0.25
TCGA-BH-A0BW	CSESSSGNYGGSQGNLIF	Primary Tumor	TRA	18	0.555556	0.666667	0.111111	0.0555556	0	0.0555556	0.0555556	0.611111	1806.86	3.99957	-0.0555556	4.09444	0.454938	0.250556	-0.405556	0.111111	4.09444	0.783288	0.00605956	55.65	0.222222	0.611111	0.111111
TCGA-BH-A0BW	CALITSGTYKYIF	Primary Tumor	TRA	13	0.461538	0.461538	0.230769	0.0769231	0.0769231	0	0.0769231	0.461538	1479.74	8.17523	0.0769231	5.33077	0.592308	0.298462	0.830769	0.230769	5.33077	0.976728	0.00850263	2.7	0.461538	0.153846	0.153846
TCGA-BH-A0BW	CALSDLPHAGNNRKLIW	Primary Tumor	TRA	17	0.294118	0.529412	0.117647	0.176471	0.117647	0.0588235	0.235294	0.529412	1908.19	8.23102	0.0588235	4.27647	0.475163	0.335294	-0.223529	0.0588235	4.27647	0.13946	0.0516577	10.7529	0.294118	0.294118	0.294118
TCGA-BH-A0BW	CALSDLPHAGNNRKLIW	Primary Tumor	TRA	17	0.294118	0.529412	0.117647	0.176471	0.117647	0.0588235	0.235294	0.529412	1908.19	8.23102	0.0588235	4.27647	0.475163	0.335294	-0.223529	0.0588235	4.27647	0.13946	0.0516577	10.7529	0.294118	0.294118	0.294118
TCGA-BH-A0BW	CATNSGGSNYKLKF	Primary Tumor	TRA	14	0.5	0.642857	0.142857	0.142857	0.142857	0	0.142857	0.571429	1489.65	9.1972	0.142857	3.90714	0.434127	0.285714	-0.592857	0.142857	3.90714	0.860473	0.0228244	-4.76429	0.214286	0.428571	0.142857
TCGA-BH-A0BW	CALSDHNYGQNFVF	Primary Tumor	TRA	14	0.285714	0.571429	0.285714	0.0714286	0	0.0714286	0.0714286	0.428571	1614.74	5.07648	-0.0714286	4.37143	0.485714	0.27	-0.128571	0.214286	4.37143	0.991678	0.00906148	9.4	0.357143	0.285714	0.142857
TCGA-BH-A0BW	CAFNYGQNFVF	Primary Tumor	TRA	11	0.272727	0.545455	0.363636	0	0	0	0	0.272727	1309.45	5.5174	0	4.92727	0.547475	0.27	0.427273	0.363636	4.92727	-1	0	-12.2909	0.454545	0.272727	0.0909091
TCGA-BH-A0BW	CARDYGQNFVF	Primary Tumor	TRA	11	0.272727	0.545455	0.272727	0.181818	0.0909091	0.0909091	0.181818	0.454545	1319.44	5.82867	0	4.26364	0.473737	0.291818	-0.236364	0.272727	4.26364	0.708657	0.00517196	-12.2909	0.363636	0.181818	0.0909091
TCGA-BH-A0BW	CVLLHPEINFGNEKLTF	Primary Tumor	TRA	17	0.176471	0.411765	0.176471	0.176471	0.0588235	0.117647	0.235294	0.411765	1974.28	5.39911	-0.0588235	4.75882	0.528758	0.334118	0.258824	0.117647	4.75882	0.199193	0.0140008	13.2647	0.411765	0.235294	0.294118
TCGA-BH-A0BW	CAAREEGSQGNLIF	Primary Tumor	TRA	14	0.428571	0.5	0.0714286	0.214286	0.0714286	0.142857	0.214286	0.642857	1494.63	4.53131	-0.0714286	4.29286	0.476984	0.307857	-0.207143	0.0714286	4.29286	0.653278	0.0158201	40.2643	0.214286	0.285714	0.357143
TCGA-BH-A0BW	CAMREWGETNAGKSTF	Primary Tumor	TRA	16	0.5	0.5625	0.125	0.25	0.125	0.125	0.25	0.6875	1787.97	6.13605	0	3.75	0.416667	0.31	-0.75	0.125	3.75	0.0807968	0.0301627	-22.9125	0.125	0.25	0.3125
TCGA-BH-A0BW	CALSDHNYGQNFVF	Primary Tumor	TRA	14	0.285714	0.571429	0.285714	0.0714286	0	0.0714286	0.0714286	0.428571	1614.74	5.07648	-0.0714286	4.37143	0.485714	0.27	-0.128571	0.214286	4.37143	0.991678	0.00906148	9.4	0.357143	0.285714	0.142857
TCGA-BH-A0BW	CAMRSSGGYQKVTF	Primary Tumor	TRA	14	0.5	0.571429	0.142857	0.142857	0.142857	0	0.142857	0.642857	1534.76	9.31244	0.142857	4.27857	0.475397	0.308571	-0.221429	0.142857	4.27857	0.229255	0.00473268	48.4786	0.214286	0.285714	0.142857
TCGA-BH-A18T	CAEIFPLNYGGSQGNLIF	Primary Tumor	TRA	18	0.333333	0.5	0.166667	0.0555556	0	0.0555556	0.111111	0.444444	1943.18	3.99957	-0.0555556	4.92222	0.546914	0.310556	0.422222	0.166667	4.92222	0.808367	0.00605956	38.9667	0.388889	0.388889	0.222222
TCGA-BH-A18T	CALCLTSGTYKYIF	Primary Tumor	TRA	14	0.5	0.5	0.214286	0.0714286	0.0714286	0	0.0714286	0.428571	1582.88	8.0329	0.0714286	5.4	0.6	0.284286	0.9	0.214286	5.4	0.945517	0.00826959	16.9786	0.428571	0.142857	0.214286
TCGA-BH-A18T	CAAFSGTYKYIF	Primary Tumor	TRA	12	0.5	0.5	0.333333	0.0833333	0.0833333	0	0.0833333	0.5	1370.57	8.17523	0.0833333	5.15	0.572222	0.289167	0.65	0.333333	5.15	0.965909	0.00861111	2.09167	0.416667	0.166667	0.166667
TCGA-BH-A18T	CAYRRYQGGSEKLVF	Primary Tumor	TRA	15	0.333333	0.4	0.2	0.266667	0.2	0.0666667	0.266667	0.6	1777.01	9.19489	0.133333	3.9	0.433333	0.312667	-0.6	0.2	3.9	0.130663	0.0389394	46.6267	0.333333	0.2	0.2
TCGA-BH-A18T	CAVGGGADGLTF	Primary Tumor	TRA	12	0.666667	0.833333	0.0833333	0.0833333	0	0.0833333	0.0833333	0.666667	1067.17	3.79987	-0.0833333	5.425	0.602778	0.244167	0.925	0.0833333	5.425	0.954546	0.00902778	18.7917	0.25	0.333333	0.25
TCGA-BH-A18T	CAFSGNTPLVF	Primary Tumor	TRA	11	0.454545	0.727273	0.181818	0	0	0	0.0909091	0.454545	1155.32	5.51813	0	5.49091	0.610101	0.322727	0.990909	0.181818	5.49091	0.830136	0	-6.34545	0.363636	0.363636	0.181818
TCGA-BH-A18T	CAESVPGSARQLTF	Primary Tumor	TRA	14	0.5	0.642857	0.0714286	0.142857	0.0714286	0.0714286	0.214286	0.714286	1465.63	5.99493	0	4.57857	0.50873	0.360714	0.0785714	0.0714286	4.57857	0.0876016	0.0283457	59.3714	0.214286	0.285714	0.285714
TCGA-BH-A18T	CALRGNQAGTALIF	Primary Tumor	TRA	14	0.5	0.571429	0.0714286	0.0714286	0.0714286	0	0.0714286	0.571429	1434.66	8.24969	0.0714286	5.2	0.577778	0.297143	0.7	0.0714286	5.2	0.945517	0.00826959	-0.535714	0.285714	0.214286	0.357143
TCGA-AC-A8OS	CAVGTSGNTPLVF	Primary Tumor	TRA	13	0.538462	0.846154	0.0769231	0	0	0	0.0769231	0.538462	1265.43	5.51813	0	5.36154	0.595726	0.324615	0.861538	0.0769231	5.36154	0.976728	0	-16.8923	0.307692	0.384615	0.153846
TCGA-OL-A5RX	CAGRYTSGTYKYIF	Primary Tumor	TRA	14	0.5	0.5	0.285714	0.142857	0.142857	0	0.142857	0.571429	1629.83	9.112	0.142857	4.23571	0.470635	0.286429	-0.264286	0.285714	4.23571	0.229255	0.00473268	-8.22857	0.357143	0.214286	0.0714286
TCGA-C8-A1HF	CVVSMTTDSWGKFQF	Primary Tumor	TRA	15	0.4	0.6	0.2	0.133333	0.0666667	0.0666667	0.133333	0.533333	1735.98	5.82867	0	4.71333	0.523704	0.308	0.213333	0.2	4.71333	0.474814	0.0210606	-2.37333	0.333333	0.2	0.0666667
TCGA-C8-A1HF	CAVSDRGSQGNLIF	Primary Tumor	TRA	14	0.428571	0.642857	0.0714286	0.142857	0.0714286	0.0714286	0.142857	0.571429	1466.62	5.82941	0	4.65714	0.51746	0.287857	0.157143	0.0714286	4.65714	0.849877	0.00554321	5.52857	0.285714	0.357143	0.142857
TCGA-C8-A1HF	CAAPYSGSARQLTF	Primary Tumor	TRA	14	0.571429	0.642857	0.142857	0.0714286	0.0714286	0	0.142857	0.714286	1471.64	8.22198	0.0714286	4.56429	0.507143	0.347143	0.0642857	0.142857	4.56429	0.115471	0.00906148	45.6143	0.214286	0.285714	0.285714
TCGA-C8-A1HF	CALSEPETTSGTYKYIF	Primary Tumor	TRA	17	0.470588	0.529412	0.176471	0.176471	0.0588235	0.117647	0.235294	0.647059	1910.1	4.53131	-0.0588235	4.27647	0.475163	0.346471	-0.223529	0.176471	4.27647	0.261464	0.0494659	37.3	0.294118	0.235294	0.235294
TCGA-C8-A1HF	CALSEGRDNDMRF	Primary Tumor	TRA	13	0.307692	0.538462	0.0769231	0.384615	0.153846	0.230769	0.384615	0.615385	1513.65	4.55817	-0.0769231	3.62308	0.402564	0.293077	-0.876923	0.0769231	3.62308	0.0479029	0.00783759	18.2462	0.153846	0.230769	0.307692
TCGA-C8-A1HF	CAVNNDMRF	Primary Tumor	TRA	9	0.222222	0.666667	0.111111	0.222222	0.111111	0.111111	0.222222	0.333333	1069.22	5.82941	0	4.3	0.477778	0.306667	-0.2	0.111111	4.3	0.277874	0.0149444	0.511111	0.222222	0.222222	0.222222
TCGA-C8-A1HF	CAAKSGGSNYKLTF	Primary Tumor	TRA	14	0.571429	0.642857	0.142857	0.142857	0.142857	0	0.142857	0.642857	1446.63	9.1972	0.142857	4.28571	0.47619	0.292857	-0.214286	0.142857	4.28571	0.229255	0.00473268	20.85	0.214286	0.357143	0.214286
TCGA-C8-A1HF	CAASSSFSGGYNKLIF	Primary Tumor	TRA	16	0.5625	0.625	0.1875	0.0625	0.0625	0	0.0625	0.5625	1651.84	8.19745	0.0625	4.95625	0.550694	0.26625	0.45625	0.1875	4.95625	0.90155	0.00766888	45.35	0.3125	0.4375	0.1875
TCGA-C8-A1HF	CAASSSFSGGYNKLMF	Primary Tumor	TRA	16	0.5625	0.625	0.1875	0.0625	0.0625	0	0.0625	0.5625	1669.88	8.19745	0.0625	4.79375	0.532639	0.264375	0.29375	0.1875	4.79375	0.90155	0.00766888	45.35	0.25	0.4375	0.25
TCGA-C8-A1HF	CAYRSANSNSGYALNF	Primary Tumor	TRA	16	0.5	0.6875	0.1875	0.0625	0.0625	0	0.0625	0.5	1737.85	8.19733	0.0625	4.13125	0.459028	0.269375	-0.36875	0.1875	4.13125	0.90155	0.00766888	26.3687	0.25	0.4375	0.25
TCGA-C8-A1HF	CMTSLPPTSVPWTGGNKLVF	Primary Tumor	TRA	20	0.4	0.7	0.1	0.05	0.05	0	0.2	0.55	2135.5	8.22223	0.05	4.78	0.531111	0.391	0.28	0.1	4.78	0.183093	0.00648148	49.57	0.3	0.4	0.15
TCGA-C8-A1HF	CMTSLPPTSVPWTGGNKLVF	Primary Tumor	TRA	20	0.4	0.7	0.1	0.05	0.05	0	0.2	0.55	2135.5	8.22223	0.05	4.78	0.531111	0.391	0.28	0.1	4.78	0.183093	0.00648148	49.57	0.3	0.4	0.15
TCGA-C8-A1HF	CALSDPYSGGGADGLTF	Primary Tumor	TRA	17	0.588235	0.764706	0.117647	0.117647	0	0.117647	0.176471	0.705882	1630.73	3.56366	-0.117647	4.65882	0.517647	0.282941	0.158824	0.117647	4.65882	0.29713	0.0063601	21.2	0.235294	0.411765	0.235294
TCGA-C8-A1HF	CAVSDRGSQGNLIF	Primary Tumor	TRA	14	0.428571	0.642857	0.0714286	0.142857	0.0714286	0.0714286	0.142857	0.571429	1466.62	5.82941	0	4.65714	0.51746	0.287857	0.157143	0.0714286	4.65714	0.849877	0.00554321	5.52857	0.285714	0.357143	0.142857
TCGA-C8-A1HF	CALSEPETTSGTYKYIF	Primary Tumor	TRA	17	0.470588	0.529412	0.176471	0.176471	0.0588235	0.117647	0.235294	0.647059	1910.1	4.53131	-0.0588235	4.27647	0.475163	0.346471	-0.223529	0.176471	4.27647	0.261464	0.0494659	37.3	0.294118	0.235294	0.235294
TCGA-C8-A1HF	CALSEPETTSGTYKYIF	Primary Tumor	TRA	17	0.470588	0.529412	0.176471	0.176471	0.0588235	0.117647	0.235294	0.647059	1910.1	4.53131	-0.0588235	4.27647	0.475163	0.346471	-0.223529	0.176471	4.27647	0.261464	0.0494659	37.3	0.294118	0.235294	0.235294
TCGA-C8-A1HF	CALSGPETTSGTYKYIF	Primary Tumor	TRA	17	0.529412	0.588235	0.176471	0.117647	0.0588235	0.0588235	0.176471	0.647059	1838.04	5.99286	0	4.45882	0.495425	0.329412	-0.0411765	0.176471	4.45882	0.343219	0.0254202	14.6412	0.294118	0.294118	0.176471
TCGA-C8-A1HF	CALSEPETTSGTYKYIF	Primary Tumor	TRA	17	0.470588	0.529412	0.176471	0.176471	0.0588235	0.117647	0.235294	0.647059	1910.1	4.53131	-0.0588235	4.27647	0.475163	0.346471	-0.223529	0.176471	4.27647	0.261464	0.0494659	37.3	0.294118	0.235294	0.235294
TCGA-C8-A1HF	CALSEPETTSGTYKYIF	Primary Tumor	TRA	17	0.470588	0.529412	0.176471	0.176471	0.0588235	0.117647	0.235294	0.647059	1910.1	4.53131	-0.0588235	4.27647	0.475163	0.346471	-0.223529	0.176471	4.27647	0.261464	0.0494659	37.3	0.294118	0.235294	0.235294
TCGA-C8-A1HF	CAEIPSRDDKIIF	Primary Tumor	TRA	13	0.230769	0.461538	0.0769231	0.384615	0.153846	0.230769	0.461538	0.615385	1506.72	4.55817	-0.0769231	4.44615	0.494017	0.396923	-0.0538462	0.0769231	4.44615	0.0736365	0.00593707	38.4	0.307692	0.153846	0.153846
TCGA-AR-A24S	CAYDPGGSQGNLIF	Primary Tumor	TRA	14	0.428571	0.642857	0.142857	0.0714286	0	0.0714286	0.142857	0.571429	1441.56	3.79987	-0.0714286	4.5	0.5	0.314286	-1.26883e-16	0.142857	4.5	0.922771	0.00826959	42.7071	0.285714	0.428571	0.142857
TCGA-AR-A24S	CAYDPGGSQGNLIF	Primary Tumor	TRA	14	0.428571	0.642857	0.142857	0.0714286	0	0.0714286	0.142857	0.571429	1441.56	3.79987	-0.0714286	4.5	0.5	0.314286	-1.26883e-16	0.142857	4.5	0.922771	0.00826959	42.7071	0.285714	0.428571	0.142857
TCGA-B6-A0RT	CAVRRDDKIIF	Primary Tumor	TRA	11	0.181818	0.454545	0.0909091	0.454545	0.272727	0.181818	0.454545	0.545455	1335.57	8.22198	0.0909091	4.53636	0.50404	0.352727	0.0363636	0.0909091	4.53636	0.353757	0.01118	45.7273	0.363636	0	0.0909091
TCGA-B6-A0RT	CAVRALPPGYSSASKIIF	Primary Tumor	TRA	18	0.444444	0.611111	0.111111	0.111111	0.111111	0	0.222222	0.611111	1880.21	9.31244	0.111111	5.16667	0.574074	0.387778	0.666667	0.111111	5.16667	0.239792	0.00822683	32.1111	0.333333	0.333333	0.222222
TCGA-B6-A0RT	CAGGFYGGATNKLIF	Primary Tumor	TRA	15	0.533333	0.6	0.2	0.0666667	0.0666667	0	0.0666667	0.533333	1518.73	8.19745	0.0666667	5.1	0.566667	0.258667	0.6	0.2	5.1	0.920366	0.0079798	36.3073	0.333333	0.333333	0.2
TCGA-B6-A0RT	CAVIREDYKLSF	Primary Tumor	TRA	12	0.25	0.416667	0.166667	0.333333	0.166667	0.166667	0.333333	0.5	1443.67	6.06183	0	4.675	0.519444	0.33	0.175	0.166667	4.675	0.0412475	0.00649471	18.1417	0.416667	0.0833333	0.25
TCGA-B6-A0RT	CAVIREDYKLSF	Primary Tumor	TRA	12	0.25	0.416667	0.166667	0.333333	0.166667	0.166667	0.333333	0.5	1443.67	6.06183	0	4.675	0.519444	0.33	0.175	0.166667	4.675	0.0412475	0.00649471	18.1417	0.416667	0.0833333	0.25
TCGA-B6-A0RT	CAVQFSGTYKYIF	Primary Tumor	TRA	13	0.384615	0.461538	0.307692	0.0769231	0.0769231	0	0.0769231	0.461538	1526.75	8.17523	0.0769231	5.01538	0.557265	0.309231	0.515385	0.307692	5.01538	0.976728	0.00850263	-3.1	0.461538	0.153846	0.0769231
TCGA-B6-A0RT	CAVQFSGTYKYIF	Primary Tumor	TRA	13	0.384615	0.461538	0.307692	0.0769231	0.0769231	0	0.0769231	0.461538	1526.75	8.17523	0.0769231	5.01538	0.557265	0.309231	0.515385	0.307692	5.01538	0.976728	0.00850263	-3.1	0.461538	0.153846	0.0769231
TCGA-B6-A0RT	CNERGIKAAGNKLTF	Primary Tumor	TRA	15	0.4	0.533333	0.0666667	0.266667	0.2	0.0666667	0.266667	0.6	1621.86	9.31244	0.133333	4.02667	0.447407	0.322	-0.473333	0.0666667	4.02667	0.0809075	0.0209568	5.04667	0.2	0.266667	0.266667
TCGA-B6-A0RT	CALSDTGANSKLTF	Primary Tumor	TRA	14	0.571429	0.714286	0.0714286	0.142857	0.0714286	0.0714286	0.142857	0.642857	1427.58	5.82867	0	4.65714	0.51746	0.287143	0.157143	0.0714286	4.65714	0.115471	0.0318889	-10.8286	0.214286	0.285714	0.285714
TCGA-B6-A0RT	CALSDTGANSKLTF	Primary Tumor	TRA	14	0.571429	0.714286	0.0714286	0.142857	0.0714286	0.0714286	0.142857	0.642857	1427.58	5.82867	0	4.65714	0.51746	0.287143	0.157143	0.0714286	4.65714	0.115471	0.0318889	-10.8286	0.214286	0.285714	0.285714
TCGA-B6-A0RT	CGYGGSQGNLIF	Primary Tumor	TRA	12	0.5	0.583333	0.166667	0	0	0	0	0.5	1215.33	5.5174	0	4.74167	0.526852	0.238333	0.241667	0.166667	4.74167	-1	0	14.275	0.333333	0.5	0.0833333
TCGA-B6-A0RT	CAGGGSARGVRF	Primary Tumor	TRA	12	0.666667	0.75	0.0833333	0.166667	0.166667	0	0.166667	0.75	1137.27	10.3519	0.166667	4.64167	0.515741	0.255833	0.141667	0.0833333	4.64167	0.570862	0.0201587	22.6583	0.166667	0.416667	0.166667
TCGA-B6-A0RT	CCVLLHRQTPPDSGGGADGLTF	Primary Tumor	TRA	22	0.454545	0.681818	0.0909091	0.136364	0.0454545	0.0909091	0.227273	0.681818	2244.51	5.21039	-0.0454545	4.5	0.5	0.33	4.03717e-17	0.0454545	4.5	0.231075	0.0243977	38.0636	0.227273	0.318182	0.181818
TCGA-B6-A0RT	CCVLLHRQTPPDSGGGADGLTF	Primary Tumor	TRA	22	0.454545	0.681818	0.0909091	0.136364	0.0454545	0.0909091	0.227273	0.681818	2244.51	5.21039	-0.0454545	4.5	0.5	0.33	4.03717e-17	0.0454545	4.5	0.231075	0.0243977	38.0636	0.227273	0.318182	0.181818
TCGA-B6-A0RT	CAASVRGGSEKLGF	Primary Tumor	TRA	14	0.571429	0.642857	0.0714286	0.214286	0.142857	0.0714286	0.214286	0.714286	1381.56	8.22223	0.0714286	4.65714	0.51746	0.287143	0.157143	0.0714286	4.65714	0.191626	0.0110958	19.7286	0.214286	0.357143	0.285714
TCGA-B6-A0RT	CAASANSGTYKYIF	Primary Tumor	TRA	14	0.571429	0.642857	0.214286	0.0714286	0.0714286	0	0.0714286	0.571429	1495.65	8.17523	0.0714286	4.67857	0.519841	0.298571	0.178571	0.214286	4.67857	0.945517	0.00826959	3.22143	0.285714	0.285714	0.214286
TCGA-B6-A0RT	CAASANSGTYKYIF	Primary Tumor	TRA	14	0.571429	0.642857	0.214286	0.0714286	0.0714286	0	0.0714286	0.571429	1495.65	8.17523	0.0714286	4.67857	0.519841	0.298571	0.178571	0.214286	4.67857	0.945517	0.00826959	3.22143	0.285714	0.285714	0.214286
TCGA-B6-A0RT	CAASANSGTYKYIF	Primary Tumor	TRA	14	0.571429	0.642857	0.214286	0.0714286	0.0714286	0	0.0714286	0.571429	1495.65	8.17523	0.0714286	4.67857	0.519841	0.298571	0.178571	0.214286	4.67857	0.945517	0.00826959	3.22143	0.285714	0.285714	0.214286
TCGA-B6-A0RT	CGAKDAGNNRKLIW	Primary Tumor	TRA	14	0.357143	0.571429	0.0714286	0.285714	0.214286	0.0714286	0.285714	0.571429	1545.76	9.31244	0.142857	3.77857	0.419841	0.319286	-0.721429	0.0714286	3.77857	0.0353111	0.0409257	-8.90714	0.214286	0.285714	0.214286
TCGA-B6-A0RT	CAYRSAGFDMRF	Primary Tumor	TRA	12	0.416667	0.5	0.25	0.25	0.166667	0.0833333	0.25	0.583333	1423.62	8.22186	0.0833333	4.38333	0.487037	0.280833	-0.116667	0.25	4.38333	0.0711232	0.0168959	35.6917	0.25	0.166667	0.25
TCGA-B6-A0RT	CAYRSAGFDMRF	Primary Tumor	TRA	12	0.416667	0.5	0.25	0.25	0.166667	0.0833333	0.25	0.583333	1423.62	8.22186	0.0833333	4.38333	0.487037	0.280833	-0.116667	0.25	4.38333	0.0711232	0.0168959	35.6917	0.25	0.166667	0.25
TCGA-B6-A0RT	CAYREYSGGGADGLTF	Primary Tumor	TRA	16	0.5625	0.625	0.1875	0.1875	0.0625	0.125	0.1875	0.6875	1666.77	4.37018	-0.0625	4.21875	0.46875	0.255	-0.28125	0.1875	4.21875	0.283018	0.0140325	11.3313	0.25	0.3125	0.25
TCGA-B6-A0RT	CATSGSARQLTF	Primary Tumor	TRA	12	0.666667	0.666667	0.0833333	0.0833333	0.0833333	0	0.0833333	0.75	1241.37	8.24969	0.0833333	4.60833	0.512037	0.296667	0.108333	0.0833333	4.60833	0.954546	0.00902778	35.5	0.166667	0.25	0.25
TCGA-B6-A0RT	CNDLSMIQGAQKLVF	Primary Tumor	TRA	15	0.266667	0.466667	0.0666667	0.133333	0.0666667	0.0666667	0.133333	0.466667	1666.96	5.82867	0	4.91333	0.545926	0.331333	0.413333	0.0666667	4.91333	0.430539	0.0224495	-1.98667	0.333333	0.2	0.266667
TCGA-B6-A0RT	CATDATNAGGTSYGKLTF	Primary Tumor	TRA	18	0.666667	0.777778	0.111111	0.111111	0.0555556	0.0555556	0.111111	0.722222	1777.91	5.82794	0	4.36111	0.484568	0.281111	-0.138889	0.111111	4.36111	0.479985	0.0199756	-4.06111	0.166667	0.277778	0.222222
TCGA-B6-A0RT	CATSGGGADGLTF	Primary Tumor	TRA	13	0.769231	0.846154	0.0769231	0.0769231	0	0.0769231	0.0769231	0.769231	1156.22	3.79987	-0.0769231	4.91538	0.546154	0.238462	0.415385	0.0769231	4.91538	1	0.009149	24.6462	0.153846	0.384615	0.230769
TCGA-B6-A0RT	CAASEAGGGADGLTF	Primary Tumor	TRA	15	0.733333	0.8	0.0666667	0.133333	0	0.133333	0.133333	0.8	1326.39	3.66595	-0.133333	4.91333	0.545926	0.262667	0.413333	0.0666667	4.91333	0.145735	0.00338384	35.5333	0.133333	0.333333	0.4
TCGA-B6-A0RT	CAVESNYQLIW	Primary Tumor	TRA	11	0.272727	0.454545	0.181818	0.0909091	0	0.0909091	0.0909091	0.363636	1325.49	3.99957	-0.0909091	4.8	0.533333	0.327273	0.3	0.181818	4.8	0.830136	0.00846167	26.6	0.454545	0.181818	0.272727
TCGA-B6-A0RT	CSKRGNYQLIW	Primary Tumor	TRA	11	0.272727	0.363636	0.181818	0.181818	0.181818	0	0.181818	0.454545	1367.57	9.31244	0.181818	3.77273	0.419192	0.317273	-0.727273	0.181818	3.77273	0.708657	0.0285761	23.2909	0.363636	0.272727	0.0909091
TCGA-B6-A0RT	CAVPLGGATNKLIF	Primary Tumor	TRA	14	0.428571	0.642857	0.0714286	0.0714286	0.0714286	0	0.142857	0.5	1403.69	8.22223	0.0714286	5.55	0.616667	0.345	1.05	0.0714286	5.55	0.229255	0.00826959	25.9071	0.357143	0.285714	0.285714
TCGA-B6-A0RT	CAVPLGGATNKLIF	Primary Tumor	TRA	14	0.428571	0.642857	0.0714286	0.0714286	0.0714286	0	0.142857	0.5	1403.69	8.22223	0.0714286	5.55	0.616667	0.345	1.05	0.0714286	5.55	0.229255	0.00826959	25.9071	0.357143	0.285714	0.285714
TCGA-B6-A0RT	CAVPLGGATNKLIF	Primary Tumor	TRA	14	0.428571	0.642857	0.0714286	0.0714286	0.0714286	0	0.142857	0.5	1403.69	8.22223	0.0714286	5.55	0.616667	0.345	1.05	0.0714286	5.55	0.229255	0.00826959	25.9071	0.357143	0.285714	0.285714
TCGA-B6-A0RT	CAVPLGGATNKLIF	Primary Tumor	TRA	14	0.428571	0.642857	0.0714286	0.0714286	0.0714286	0	0.142857	0.5	1403.69	8.22223	0.0714286	5.55	0.616667	0.345	1.05	0.0714286	5.55	0.229255	0.00826959	25.9071	0.357143	0.285714	0.285714
TCGA-B6-A0RT	CAVSPYGQNFVF	Primary Tumor	TRA	12	0.333333	0.666667	0.25	0	0	0	0.0833333	0.416667	1331.49	5.5174	0	5.1	0.566667	0.346667	0.6	0.25	5.1	0.954546	0	26.1833	0.416667	0.333333	0.0833333
TCGA-B6-A0RT	CATSGSARQLTF	Primary Tumor	TRA	12	0.666667	0.666667	0.0833333	0.0833333	0.0833333	0	0.0833333	0.75	1241.37	8.24969	0.0833333	4.60833	0.512037	0.296667	0.108333	0.0833333	4.60833	0.954546	0.00902778	35.5	0.166667	0.25	0.25
TCGA-B6-A0RT	CAGGGSARQLTF	Primary Tumor	TRA	12	0.666667	0.666667	0.0833333	0.0833333	0.0833333	0	0.0833333	0.75	1167.3	8.24969	0.0833333	4.66667	0.518519	0.271667	0.166667	0.0833333	4.66667	0.954546	0.00902778	56.0667	0.166667	0.333333	0.25
TCGA-B6-A0RT	CAVIREDYKLSF	Primary Tumor	TRA	12	0.25	0.416667	0.166667	0.333333	0.166667	0.166667	0.333333	0.5	1443.67	6.06183	0	4.675	0.519444	0.33	0.175	0.166667	4.675	0.0412475	0.00649471	18.1417	0.416667	0.0833333	0.25
TCGA-B6-A0RT	CAVIREDYKLSF	Primary Tumor	TRA	12	0.25	0.416667	0.166667	0.333333	0.166667	0.166667	0.333333	0.5	1443.67	6.06183	0	4.675	0.519444	0.33	0.175	0.166667	4.675	0.0412475	0.00649471	18.1417	0.416667	0.0833333	0.25
TCGA-B6-A0RT	CALRKAAGNKLTF	Primary Tumor	TRA	13	0.461538	0.538462	0.0769231	0.230769	0.230769	0	0.230769	0.615385	1392.67	10.062	0.230769	4.60769	0.511966	0.325385	0.107692	0.0769231	4.60769	0.0869945	0.010685	38.6923	0.230769	0.153846	0.384615
TCGA-B6-A0RT	CALVGPGGSYIPTF	Primary Tumor	TRA	14	0.5	0.714286	0.142857	0	0	0	0.142857	0.571429	1381.59	5.5174	0	5.38571	0.598413	0.357857	0.885714	0.142857	5.38571	0.167089	0	18.7929	0.357143	0.428571	0.142857
TCGA-B6-A0RT	CALVGPGGSYIPTF	Primary Tumor	TRA	14	0.5	0.714286	0.142857	0	0	0	0.142857	0.571429	1381.59	5.5174	0	5.38571	0.598413	0.357857	0.885714	0.142857	5.38571	0.167089	0	18.7929	0.357143	0.428571	0.142857
TCGA-B6-A0RT	CLVGESSSASKIIF	Primary Tumor	TRA	14	0.5	0.571429	0.0714286	0.142857	0.0714286	0.0714286	0.142857	0.571429	1440.66	5.99432	0	5.43571	0.603968	0.305	0.935714	0.0714286	5.43571	0.115471	0.0318889	46.8	0.357143	0.357143	0.214286
TCGA-A1-A0SI	CGTEIRAYGGSQGNLIF	Primary Tumor	TRA	17	0.470588	0.529412	0.117647	0.117647	0.0588235	0.0588235	0.117647	0.588235	1785.97	5.9942	0	4.52941	0.503268	0.278824	0.0294118	0.117647	4.52941	0.891501	0.0069302	35.6765	0.294118	0.352941	0.176471
TCGA-A1-A0SI	CGTEIRAYGGSQGNLIF	Primary Tumor	TRA	17	0.470588	0.529412	0.117647	0.117647	0.0588235	0.0588235	0.117647	0.588235	1785.97	5.9942	0	4.52941	0.503268	0.278824	0.0294118	0.117647	4.52941	0.891501	0.0069302	35.6765	0.294118	0.352941	0.176471
TCGA-A1-A0SI	CGTEIRAYGGSQGNLIF	Primary Tumor	TRA	17	0.470588	0.529412	0.117647	0.117647	0.0588235	0.0588235	0.117647	0.588235	1785.97	5.9942	0	4.52941	0.503268	0.278824	0.0294118	0.117647	4.52941	0.891501	0.0069302	35.6765	0.294118	0.352941	0.176471
TCGA-A1-A0SI	CAYGEAGNMLTF	Primary Tumor	TRA	12	0.5	0.583333	0.166667	0.0833333	0	0.0833333	0.0833333	0.5	1276.44	3.99957	-0.0833333	4.9	0.544444	0.273333	0.4	0.166667	4.9	0.954546	0.00902778	-0.983333	0.25	0.25	0.416667
TCGA-S3-AA10	CGELNGNKLVF	Primary Tumor	TRA	11	0.272727	0.545455	0.0909091	0.181818	0.0909091	0.0909091	0.181818	0.363636	1193.37	5.99432	0	4.67273	0.519192	0.279091	0.172727	0.0909091	4.67273	0.0338702	0.0315741	-5.33636	0.363636	0.363636	0.272727
TCGA-S3-AA10	CGELNGNKLVF	Primary Tumor	TRA	11	0.272727	0.545455	0.0909091	0.181818	0.0909091	0.0909091	0.181818	0.363636	1193.37	5.99432	0	4.67273	0.519192	0.279091	0.172727	0.0909091	4.67273	0.0338702	0.0315741	-5.33636	0.363636	0.363636	0.272727
TCGA-S3-AA10	CSDFGASWGKLQF	Primary Tumor	TRA	13	0.461538	0.538462	0.230769	0.153846	0.0769231	0.0769231	0.153846	0.615385	1445.6	5.82867	0	4.46154	0.495726	0.275385	-0.0384615	0.230769	4.46154	0.233903	0.0277083	-4.86154	0.307692	0.307692	0.153846
TCGA-S3-AA10	CALSGNTPLVF	Primary Tumor	TRA	11	0.454545	0.727273	0.0909091	0	0	0	0.0909091	0.454545	1121.31	5.51813	0	5.58182	0.620202	0.329091	1.08182	0.0909091	5.58182	0.830136	0	-6.34545	0.363636	0.363636	0.272727
TCGA-S3-AA10	CAVGGNNDMRF	Primary Tumor	TRA	11	0.363636	0.727273	0.0909091	0.181818	0.0909091	0.0909091	0.181818	0.454545	1183.32	5.82941	0	4.26364	0.473737	0.274545	-0.236364	0.0909091	4.26364	0.645799	0.0103439	-1.98182	0.181818	0.363636	0.181818
TCGA-JL-A3YW	CRHLPLWSRPYAGNNRKLIW	Primary Tumor	TRA	20	0.2	0.4	0.2	0.2	0.2	0	0.3	0.5	2480.89	10.9164	0.2	3.755	0.417222	0.3645	-0.745	0.15	3.755	0.0820644	0.0153704	63.21	0.35	0.3	0.2
TCGA-A8-A09K	CERLRFVLLCCEGTGFQKLVF	Primary Tumor	TRA	21	0.285714	0.380952	0.142857	0.238095	0.142857	0.0952381	0.238095	0.428571	2461.97	7.95819	0.047619	5.19524	0.577249	0.298571	0.695238	0.142857	5.19524	0.220814	0.0290947	6.56667	0.428571	0.0952381	0.285714
TCGA-A8-A09K	CCVLLPRGRGALGAGNMLTF	Primary Tumor	TRA	20	0.45	0.6	0.05	0.1	0.1	0	0.15	0.5	2049.49	9.0235	0.1	5.315	0.590556	0.2995	0.815	0.05	5.315	0.801039	0.0226852	-3.465	0.3	0.3	0.35
TCGA-A8-A09K	CRGGGGSQGNLIF	Primary Tumor	TRA	13	0.538462	0.615385	0.0769231	0.0769231	0.0769231	0	0.0769231	0.615385	1265.4	8.24969	0.0769231	4.44615	0.494017	0.24	-0.0538462	0.0769231	4.44615	0.930183	0.00720989	39.4615	0.230769	0.538462	0.0769231
TCGA-A8-A09K	CGVMNNDMRF	Primary Tumor	TRA	10	0.2	0.6	0.1	0.2	0.1	0.1	0.2	0.3	1186.38	5.82941	0	4.29	0.476667	0.288	-0.21	0.1	4.29	0.509756	0.0122222	1.46	0.2	0.3	0.2
TCGA-A8-A09K	CTSVQQKRAGNNRKLIW	Primary Tumor	TRA	17	0.294118	0.470588	0.0588235	0.235294	0.235294	0	0.235294	0.588235	2002.3	11.013	0.235294	3.51176	0.390196	0.356471	-0.988235	0.0588235	3.51176	0.255643	0.0192574	49.1059	0.235294	0.235294	0.117647
TCGA-A8-A09K	CVVTGDNTDKLIF	Primary Tumor	TRA	13	0.307692	0.692308	0.0769231	0.230769	0.0769231	0.153846	0.230769	0.461538	1424.62	4.20782	-0.0769231	4.94615	0.549573	0.31	0.446154	0.0769231	4.94615	0.196622	0.0229325	-29.2231	0.384615	0.153846	0.0769231
TCGA-A8-A09K	CVVSAGNTDKLIF	Primary Tumor	TRA	13	0.384615	0.692308	0.0769231	0.153846	0.0769231	0.0769231	0.153846	0.461538	1366.58	5.82867	0	5.34615	0.594017	0.309231	0.846154	0.0769231	5.34615	0.830755	0.00395833	-22.6923	0.384615	0.230769	0.153846
TCGA-A8-A09K	CAVKGNRDDKIIF	Primary Tumor	TRA	13	0.230769	0.538462	0.0769231	0.384615	0.230769	0.153846	0.384615	0.538462	1478.72	8.19745	0.0769231	4.27692	0.475214	0.343077	-0.223077	0.0769231	4.27692	0.0713783	0.0204925	-19.1077	0.307692	0.153846	0.0769231
TCGA-A8-A09K	CAGEGDYKLSF	Primary Tumor	TRA	11	0.454545	0.545455	0.181818	0.272727	0.0909091	0.181818	0.272727	0.636364	1189.29	4.37018	-0.0909091	4.23636	0.470707	0.278182	-0.263636	0.181818	4.23636	0.0665833	0.0394285	-5.48182	0.272727	0.272727	0.272727
TCGA-A8-A09D	CSSETPSPVIQPPTSVPW	Primary Tumor	TRA	18	0.388889	0.777778	0.0555556	0.0555556	0	0.0555556	0.333333	0.722222	1912.12	3.99969	-0.0555556	4.21667	0.468519	0.512222	-0.283333	0.0555556	4.21667	0.0195192	0.0070506	107.156	0.222222	0.5	0.0555556
TCGA-A8-A09D	CAASKGTYKYIF	Primary Tumor	TRA	12	0.5	0.5	0.25	0.166667	0.166667	0	0.166667	0.583333	1351.57	9.11285	0.166667	4.59167	0.510185	0.321667	0.0916667	0.25	4.59167	0.119457	0.00785714	-4.98333	0.333333	0.166667	0.166667
TCGA-A8-A09D	CAASKGTYKYIF	Primary Tumor	TRA	12	0.5	0.5	0.25	0.166667	0.166667	0	0.166667	0.583333	1351.57	9.11285	0.166667	4.59167	0.510185	0.321667	0.0916667	0.25	4.59167	0.119457	0.00785714	-4.98333	0.333333	0.166667	0.166667
TCGA-A8-A09D	CAASKGTYKYIF	Primary Tumor	TRA	12	0.5	0.5	0.25	0.166667	0.166667	0	0.166667	0.583333	1351.57	9.11285	0.166667	4.59167	0.510185	0.321667	0.0916667	0.25	4.59167	0.119457	0.00785714	-4.98333	0.333333	0.166667	0.166667
TCGA-GM-A3NY	CDVFLCFHAAGTYKYIF	Primary Tumor	TRA	17	0.352941	0.470588	0.352941	0.117647	0.0588235	0.0588235	0.117647	0.411765	1998.33	6.72394	0	5.39412	0.599346	0.281176	0.894118	0.294118	5.39412	0.560947	0.0161752	15.7471	0.470588	0.0588235	0.176471
TCGA-A8-A09X	CAVRDISPWGSGSARQLTF	Primary Tumor	TRA	19	0.473684	0.631579	0.105263	0.157895	0.105263	0.0526316	0.210526	0.684211	2051.29	8.24957	0.0526316	4.44737	0.494152	0.332632	-0.0526316	0.105263	4.44737	0.229943	0.0116035	42.2579	0.263158	0.315789	0.157895
TCGA-A8-A09X	CAVRDISPLGSGSARQLTF	Primary Tumor	TRA	19	0.473684	0.631579	0.0526316	0.157895	0.105263	0.0526316	0.210526	0.684211	1978.23	8.24957	0.0526316	4.69474	0.521637	0.332105	0.194737	0.0526316	4.69474	0.229943	0.0116035	49.2316	0.263158	0.315789	0.210526
TCGA-A8-A09X	CAVRDISPWGSGSARQLTF	Primary Tumor	TRA	19	0.473684	0.631579	0.105263	0.157895	0.105263	0.0526316	0.210526	0.684211	2051.29	8.24957	0.0526316	4.44737	0.494152	0.332632	-0.0526316	0.105263	4.44737	0.229943	0.0116035	42.2579	0.263158	0.315789	0.157895
TCGA-A8-A09X	CALAVLMKTSYDKVIF	Primary Tumor	TRA	16	0.3125	0.5	0.125	0.1875	0.125	0.0625	0.1875	0.4375	1802.2	8.17523	0.0625	5.575	0.619444	0.3375	1.075	0.125	5.575	0.432307	0.00953476	13.5625	0.4375	0.0625	0.3125
TCGA-A8-A09X	CAVCVTGNTGKLIF	Primary Tumor	TRA	14	0.5	0.714286	0.0714286	0.0714286	0.0714286	0	0.0714286	0.428571	1425.72	8.05841	0.0714286	5.69286	0.63254	0.298571	1.19286	0.0714286	5.69286	0.945517	0.00826959	-38.55	0.357143	0.214286	0.142857
TCGA-A8-A09X	CVVSTGNQFYF	Primary Tumor	TRA	11	0.363636	0.636364	0.272727	0	0	0	0	0.363636	1264.41	5.5174	0	5.07273	0.563636	0.282727	0.572727	0.272727	5.07273	-1	0	2.72818	0.454545	0.272727	0
TCGA-A8-A09X	CVVSEPGGGADGLTF	Primary Tumor	TRA	15	0.533333	0.8	0.0666667	0.133333	0	0.133333	0.2	0.666667	1408.53	3.66595	-0.133333	5.00667	0.556296	0.307333	0.506667	0.0666667	5.00667	0.123987	0.00338384	43.3467	0.266667	0.4	0.2
TCGA-A8-A09X	CAASRGSGTYKYIF	Primary Tumor	TRA	14	0.571429	0.571429	0.214286	0.142857	0.142857	0	0.142857	0.642857	1523.71	9.19598	0.142857	4.45	0.494444	0.289286	-0.05	0.214286	4.45	0.115471	0.00277324	10.9143	0.285714	0.285714	0.142857
TCGA-A8-A09X	CAVSVGYNARLMF	Primary Tumor	TRA	13	0.384615	0.615385	0.153846	0.0769231	0.0769231	0	0.0769231	0.384615	1430.69	8.22198	0.0769231	5.46154	0.606838	0.293077	0.961538	0.153846	5.46154	0.976728	0.00850263	-3.83077	0.384615	0.230769	0.307692
TCGA-A8-A09X	CARHTDKLIF	Primary Tumor	TRA	10	0.3	0.4	0.2	0.3	0.2	0.1	0.3	0.6	1203.41	8.23102	0.1	4.46	0.495556	0.318	-0.04	0.1	4.46	0.0454008	0.00320988	3.74	0.3	0	0.2
TCGA-A8-A09X	CAIKGNRDDKIIF	Primary Tumor	TRA	13	0.230769	0.461538	0.0769231	0.384615	0.230769	0.153846	0.384615	0.538462	1492.74	8.19745	0.0769231	4.3	0.477778	0.343077	-0.2	0.0769231	4.3	0.0713783	0.0204925	-23.4231	0.307692	0.153846	0.0769231
TCGA-A8-A09X	CAMSSVQGAQKLVF	Primary Tumor	TRA	14	0.428571	0.571429	0.0714286	0.0714286	0.0714286	0	0.0714286	0.571429	1468.74	8.22223	0.0714286	5.22143	0.580159	0.340714	0.721429	0.0714286	5.22143	0.945517	0.00826959	42.3	0.285714	0.214286	0.285714
TCGA-A8-A09X	CNEREVQGAQKLVF	Primary Tumor	TRA	14	0.214286	0.428571	0.0714286	0.285714	0.142857	0.142857	0.285714	0.571429	1620.83	6.13605	0	4	0.444444	0.360714	-0.5	0.0714286	4	0.176637	0.0188971	-2.84286	0.285714	0.142857	0.285714
TCGA-A8-A09X	CALAVLMKTSYDKVIF	Primary Tumor	TRA	16	0.3125	0.5	0.125	0.1875	0.125	0.0625	0.1875	0.4375	1802.2	8.17523	0.0625	5.575	0.619444	0.3375	1.075	0.125	5.575	0.432307	0.00953476	13.5625	0.4375	0.0625	0.3125
TCGA-A8-A09X	CALSEAHGNKLVF	Primary Tumor	TRA	13	0.384615	0.538462	0.153846	0.153846	0.0769231	0.0769231	0.153846	0.538462	1388.59	6.73956	0	4.91538	0.546154	0.296154	0.415385	0.0769231	4.91538	0.0709504	0.0321528	14.6923	0.307692	0.230769	0.384615
TCGA-A8-A09X	CRSGAGGGADGLTF	Primary Tumor	TRA	14	0.714286	0.785714	0.0714286	0.142857	0.0714286	0.0714286	0.142857	0.785714	1268.36	5.82941	0	4.58571	0.509524	0.235	0.0857143	0.0714286	4.58571	0.343039	0.0248025	48.9214	0.142857	0.428571	0.214286
TCGA-A8-A09X	CAVEDRGGSQGNLIF	Primary Tumor	TRA	15	0.4	0.6	0.0666667	0.2	0.0666667	0.133333	0.2	0.6	1565.71	4.37018	-0.0666667	4.44	0.493333	0.289333	-0.06	0.0666667	4.44	0.730729	0.00971661	26.8933	0.266667	0.333333	0.2
TCGA-A8-A09X	CAVRDTSGGSYIPTF	Primary Tumor	TRA	15	0.533333	0.733333	0.133333	0.133333	0.0666667	0.0666667	0.2	0.666667	1573.72	5.82867	0	4.57333	0.508148	0.325333	0.0733333	0.133333	4.57333	0.414857	0.00320707	13.8467	0.266667	0.333333	0.0666667
TCGA-BH-A0BJ	CAVRDRNYGQNFVF	Primary Tumor	TRA	14	0.214286	0.571429	0.214286	0.214286	0.142857	0.0714286	0.214286	0.428571	1688.86	8.22186	0.0714286	4.04286	0.449206	0.303571	-0.457143	0.214286	4.04286	0.653278	0.00348145	-4.08571	0.357143	0.214286	0.0714286
TCGA-BH-A0BJ	CAESIGRNTGFQKLVF	Primary Tumor	TRA	16	0.375	0.5	0.125	0.1875	0.125	0.0625	0.1875	0.5625	1770.02	8.22223	0.0625	4.575	0.508333	0.31	0.075	0.125	4.575	0.0991682	0.0221512	13.2063	0.3125	0.25	0.1875
TCGA-BH-A0BJ	CSVLLCSKRWDNYGQNFVF	Primary Tumor	TRA	19	0.263158	0.526316	0.210526	0.157895	0.105263	0.0526316	0.157895	0.368421	2279.59	8.04523	0.0526316	4.5	0.5	0.290526	-4.67462e-17	0.210526	4.5	0.743867	0.0230499	44.4	0.421053	0.263158	0.105263
TCGA-EW-A423	CAVRDTSNQAGTALIF	Primary Tumor	TRA	16	0.5	0.6875	0.0625	0.125	0.0625	0.0625	0.125	0.625	1666.85	5.82941	0	4.85	0.538889	0.315	0.35	0.0625	4.85	1	0.00292929	-10.0375	0.25	0.1875	0.25
TCGA-EW-A423	CAMREVNSGYSTLTF	Primary Tumor	TRA	15	0.466667	0.6	0.133333	0.133333	0.0666667	0.0666667	0.133333	0.533333	1678.88	5.9942	0	4.55333	0.505926	0.29	0.0533333	0.133333	4.55333	0.999558	0.00320707	6.87333	0.266667	0.266667	0.266667
TCGA-OL-A6VQ	CAVGNSGYSTLTF	Primary Tumor	TRA	13	0.615385	0.769231	0.153846	0	0	0	0	0.538462	1319.44	5.5174	0	5	0.555556	0.255385	0.5	0.153846	5	-1	0	-0.869231	0.307692	0.384615	0.153846
TCGA-OL-A6VQ	CALRGAAGNKLTF	Primary Tumor	TRA	13	0.538462	0.615385	0.0769231	0.153846	0.153846	0	0.153846	0.615385	1321.55	9.50775	0.153846	4.87692	0.54188	0.292308	0.376923	0.0769231	4.87692	0.0968171	0.00234385	25.6308	0.230769	0.230769	0.384615
TCGA-A8-A076	CCNSGYSTLTF	Primary Tumor	TRA	11	0.636364	0.727273	0.181818	0	0	0	0	0.454545	1195.32	5.5108	0	4.80909	0.534343	0.243636	0.309091	0.181818	4.80909	-1	0	12.5909	0.272727	0.363636	0.0909091
TCGA-A8-A076	CAVNAGNNRKLIW	Primary Tumor	TRA	13	0.307692	0.615385	0.0769231	0.153846	0.153846	0	0.153846	0.384615	1458.69	9.50775	0.153846	4.37692	0.486325	0.318462	-0.123077	0.0769231	4.37692	0.830755	0.0313449	-3.83077	0.307692	0.307692	0.230769
TCGA-D8-A1X9	CAVKDSNYQLIW	Primary Tumor	TRA	12	0.25	0.5	0.166667	0.166667	0.0833333	0.0833333	0.166667	0.416667	1439.63	5.82794	0	4.45	0.494444	0.336667	-0.05	0.166667	4.45	0.71572	0.00448413	22.8167	0.416667	0.166667	0.166667
TCGA-D8-A1X9	CAVKDSNYQLIW	Primary Tumor	TRA	12	0.25	0.5	0.166667	0.166667	0.0833333	0.0833333	0.166667	0.416667	1439.63	5.82794	0	4.45	0.494444	0.336667	-0.05	0.166667	4.45	0.71572	0.00448413	22.8167	0.416667	0.166667	0.166667
TCGA-D8-A1X9	CILRDARLTSGGGADGLTF	Primary Tumor	TRA	19	0.526316	0.631579	0.0526316	0.210526	0.105263	0.105263	0.210526	0.684211	1923.15	5.95404	0	4.76316	0.52924	0.264737	0.263158	0.0526316	4.76316	0.326682	0.0169048	40.2947	0.263158	0.263158	0.263158
TCGA-D8-A1X9	CAVMDSNYQLIW	Primary Tumor	TRA	12	0.25	0.5	0.166667	0.0833333	0	0.0833333	0.0833333	0.333333	1442.66	3.79987	-0.0833333	4.93333	0.548148	0.32	0.433333	0.166667	4.93333	0.954546	0.00902778	25.2167	0.416667	0.166667	0.25
TCGA-D8-A1X9	CAVMDSNYQLIW	Primary Tumor	TRA	12	0.25	0.5	0.166667	0.0833333	0	0.0833333	0.0833333	0.333333	1442.66	3.79987	-0.0833333	4.93333	0.548148	0.32	0.433333	0.166667	4.93333	0.954546	0.00902778	25.2167	0.416667	0.166667	0.25
TCGA-D8-A1X9	CALPGSNNARLMF	Primary Tumor	TRA	13	0.384615	0.615385	0.0769231	0.0769231	0.0769231	0	0.153846	0.461538	1393.63	8.24969	0.0769231	4.81538	0.535043	0.33	0.315385	0.0769231	4.81538	0.0968171	0.00850263	24.0462	0.230769	0.384615	0.384615
TCGA-A2-A0T6	CCERASYSGGGADGLTF	Primary Tumor	TRA	17	0.647059	0.705882	0.117647	0.176471	0.0588235	0.117647	0.176471	0.705882	1693.81	4.37018	-0.0588235	4.41176	0.490196	0.254118	-0.0882353	0.117647	4.41176	0.442666	0.0131157	21.2	0.176471	0.352941	0.235294
TCGA-A2-A0T6	CAMTKGNQFYF	Primary Tumor	TRA	11	0.363636	0.454545	0.272727	0.0909091	0.0909091	0	0.0909091	0.454545	1309.51	8.19745	0.0909091	4.36364	0.484848	0.307273	-0.136364	0.272727	4.36364	0.773514	0.00851098	6.96455	0.272727	0.181818	0.181818
TCGA-A2-A0T6	CAASGAGGTSYGKLTF	Primary Tumor	TRA	16	0.75	0.75	0.125	0.0625	0.0625	0	0.0625	0.75	1490.64	8.19745	0.0625	4.79375	0.532639	0.26375	0.29375	0.125	4.79375	0.90155	0.00766888	-1.73125	0.1875	0.375	0.25
TCGA-A2-A0T6	CAYRSAGGGSEKLVF	Primary Tumor	TRA	15	0.533333	0.6	0.133333	0.2	0.133333	0.0666667	0.2	0.666667	1544.73	8.19757	0.0666667	4.56	0.506667	0.284667	0.06	0.133333	4.56	0.290505	0.0126571	50.9867	0.266667	0.333333	0.266667
TCGA-A2-A0T6	CYGGSNYKLTF	Primary Tumor	TRA	11	0.454545	0.545455	0.272727	0.0909091	0.0909091	0	0.0909091	0.454545	1252.39	8.17523	0.0909091	4.20909	0.467677	0.255455	-0.290909	0.272727	4.20909	0.830136	0.00846167	16.0909	0.363636	0.363636	0.0909091
TCGA-A2-A0T6	CAASGAGGTSYGKLTF	Primary Tumor	TRA	16	0.75	0.75	0.125	0.0625	0.0625	0	0.0625	0.75	1490.64	8.19745	0.0625	4.79375	0.532639	0.26375	0.29375	0.125	4.79375	0.90155	0.00766888	-1.73125	0.1875	0.375	0.25
TCGA-A2-A0T6	CAVFSVGGGADGLTF	Primary Tumor	TRA	15	0.6	0.8	0.133333	0.0666667	0	0.0666667	0.0666667	0.6	1400.56	3.79987	-0.0666667	5.65333	0.628148	0.248667	1.15333	0.133333	5.65333	0.982605	0.00886364	17.0333	0.333333	0.333333	0.2
TCGA-A2-A0T6	CSKALWGQNFVF	Primary Tumor	TRA	12	0.333333	0.5	0.25	0.0833333	0.0833333	0	0.0833333	0.416667	1399.61	8.22223	0.0833333	4.90833	0.54537	0.2975	0.408333	0.25	4.90833	0.977273	0.00819444	7.73333	0.416667	0.25	0.166667
TCGA-A2-A4S3	CAVGRPRFNQAGTALIF	Primary Tumor	TRA	17	0.411765	0.588235	0.117647	0.117647	0.117647	0	0.176471	0.588235	1821.11	10.3519	0.117647	4.90588	0.545098	0.344706	0.405882	0.117647	4.90588	0.764351	0.0243736	1.88235	0.294118	0.235294	0.235294
TCGA-A2-A4S3	CAMITGFQKLVF	Primary Tumor	TRA	12	0.333333	0.416667	0.166667	0.0833333	0.0833333	0	0.0833333	0.416667	1357.68	8.22223	0.0833333	5.81667	0.646296	0.323333	1.31667	0.166667	5.81667	0.965909	0.00861111	-4.98333	0.416667	0.0833333	0.25
TCGA-A2-A4S3	CAVVRGRDNTGKLIF	Primary Tumor	TRA	15	0.333333	0.6	0.0666667	0.266667	0.2	0.0666667	0.266667	0.533333	1648.93	9.50409	0.133333	4.66	0.517778	0.311333	0.16	0.0666667	4.66	0.0825508	0.0152217	-18.9667	0.333333	0.2	0.133333
TCGA-A2-A4S3	CALGTDSWGKLQF	Primary Tumor	TRA	13	0.461538	0.538462	0.153846	0.153846	0.0769231	0.0769231	0.153846	0.615385	1425.61	5.82867	0	4.54615	0.505128	0.286923	0.0461538	0.153846	4.54615	0.214446	0.0259722	15.7538	0.307692	0.230769	0.230769
TCGA-BH-A18Q	CADDYHNNNDMRF	Primary Tumor	TRA	13	0.153846	0.615385	0.230769	0.307692	0.0769231	0.230769	0.307692	0.461538	1614.67	4.41327	-0.153846	2.88462	0.320513	0.283846	-1.61538	0.153846	2.88462	0.171436	0.0354845	24.6077	0.153846	0.230769	0.153846
TCGA-BH-A18Q	CCVLRDKLIF	Primary Tumor	TRA	10	0.2	0.4	0.1	0.3	0.2	0.1	0.3	0.3	1209.52	8.05841	0.1	5.72	0.635556	0.317	1.22	0.1	5.72	0.059293	0.00308642	3.74	0.5	0	0.2
TCGA-BH-A18Q	CGTSYGKLTF	Primary Tumor	TRA	10	0.6	0.6	0.2	0.1	0.1	0	0.1	0.6	1076.22	8.19745	0.1	4.59	0.51	0.261	0.09	0.2	4.59	0.653974	0.00777778	-12.62	0.3	0.3	0.1
TCGA-BH-A18Q	CAVISNYQLIW	Primary Tumor	TRA	11	0.272727	0.454545	0.181818	0	0	0	0	0.272727	1309.53	5.5174	0	5.52727	0.614141	0.324545	1.02727	0.181818	5.52727	-1	0	9.09091	0.545455	0.181818	0.181818
TCGA-BH-A18Q	CAAPRPNSGNTPLVF	Primary Tumor	TRA	15	0.4	0.8	0.0666667	0.0666667	0.0666667	0	0.266667	0.6	1543.75	8.24969	0.0666667	4.41333	0.49037	0.426667	-0.0866667	0.0666667	4.41333	0.16063	0.00886364	18.6667	0.2	0.466667	0.2
TCGA-B6-A0IJ	CALSDRSQGGSEKLVF	Primary Tumor	TRA	16	0.4375	0.5625	0.0625	0.25	0.125	0.125	0.25	0.6875	1696.88	6.06256	0	4.3	0.477778	0.301875	-0.2	0.0625	4.3	0.135052	0.00752525	58.6063	0.25	0.3125	0.25
TCGA-B6-A0IJ	CCCVLLHPGDNYGQNFVF	Primary Tumor	TRA	18	0.277778	0.611111	0.222222	0.0555556	0	0.0555556	0.111111	0.333333	2029.32	5.07599	-0.0555556	4.95556	0.550617	0.301667	0.455556	0.166667	4.95556	0.831078	0.00839778	-9.41111	0.388889	0.277778	0.111111
TCGA-B6-A0IJ	CHLLLCRDLYNNNDMRF	Primary Tumor	TRA	17	0.117647	0.411765	0.176471	0.235294	0.117647	0.117647	0.235294	0.294118	2140.47	6.72906	0	4.14118	0.460131	0.271176	-0.358824	0.117647	4.14118	0.298312	0.0107835	24.1529	0.352941	0.176471	0.294118
TCGA-B6-A0IJ	CALSDRSQGGSEKLVF	Primary Tumor	TRA	16	0.4375	0.5625	0.0625	0.25	0.125	0.125	0.25	0.6875	1696.88	6.06256	0	4.3	0.477778	0.301875	-0.2	0.0625	4.3	0.135052	0.00752525	58.6063	0.25	0.3125	0.25
TCGA-B6-A0IJ	CACNDMRF	Primary Tumor	TRA	8	0.375	0.625	0.125	0.25	0.125	0.125	0.25	0.375	959.125	5.82257	0	4.5	0.5	0.29375	-5.55112e-17	0.125	4.5	0.106735	0.0146296	54.25	0.125	0.125	0.25
TCGA-B6-A0IJ	CACNDMRF	Primary Tumor	TRA	8	0.375	0.625	0.125	0.25	0.125	0.125	0.25	0.375	959.125	5.82257	0	4.5	0.5	0.29375	-5.55112e-17	0.125	4.5	0.106735	0.0146296	54.25	0.125	0.125	0.25
TCGA-B6-A0IJ	CSKTGRDGGSQGNLIF	Primary Tumor	TRA	16	0.5	0.625	0.0625	0.1875	0.125	0.0625	0.1875	0.6875	1639.79	8.22211	0.0625	3.925	0.436111	0.275625	-0.575	0.0625	3.925	0.673394	0.0145509	18.5125	0.1875	0.4375	0.0625
TCGA-B6-A0IJ	CAVASGTYKYIF	Primary Tumor	TRA	12	0.5	0.583333	0.25	0.0833333	0.0833333	0	0.0833333	0.5	1322.53	8.17523	0.0833333	5.26667	0.585185	0.3075	0.766667	0.25	5.26667	0.965909	0.00861111	2.09167	0.416667	0.166667	0.166667
TCGA-B6-A0IJ	CAGPTDSNYQLIW	Primary Tumor	TRA	13	0.384615	0.615385	0.153846	0.0769231	0	0.0769231	0.153846	0.538462	1467.6	3.79987	-0.0769231	4.22308	0.469231	0.349231	-0.276923	0.153846	4.22308	0.649958	0.00928254	24.0462	0.307692	0.307692	0.153846
TCGA-B6-A0IJ	CCEAPRDDKIIF	Primary Tumor	TRA	12	0.25	0.5	0.0833333	0.416667	0.166667	0.25	0.5	0.583333	1409.63	4.55804	-0.0833333	4.34167	0.482407	0.398333	-0.158333	0.0833333	4.34167	0.298907	0.00454145	4.78333	0.25	0.0833333	0.166667
TCGA-B6-A0IJ	CVVSARGQNFVF	Primary Tumor	TRA	12	0.333333	0.666667	0.166667	0.0833333	0.0833333	0	0.0833333	0.416667	1326.52	8.24969	0.0833333	5.31667	0.590741	0.306667	0.816667	0.166667	5.31667	0.930665	0.00902778	-16.7167	0.416667	0.25	0.0833333
TCGA-B6-A0IJ	CCAYGNNRLAF	Primary Tumor	TRA	11	0.454545	0.636364	0.181818	0.0909091	0.0909091	0	0.0909091	0.363636	1231.4	8.05829	0.0909091	4.68182	0.520202	0.268182	0.181818	0.181818	4.68182	0.830136	0.00846167	-6.34545	0.272727	0.272727	0.272727
TCGA-GM-A2DH	CGRQMLLFTTVQYPCRDDKIIF	Primary Tumor	TRA	22	0.227273	0.409091	0.136364	0.227273	0.136364	0.0909091	0.272727	0.5	2648.13	8.04523	0.0454545	4.57727	0.508586	0.356818	0.0772727	0.136364	4.57727	0.46188	0.00733623	9.33636	0.363636	0.0909091	0.136364
TCGA-GM-A2DH	CGRQMLLFTTVQYPCRDDKIIF	Primary Tumor	TRA	22	0.227273	0.409091	0.136364	0.227273	0.136364	0.0909091	0.272727	0.5	2648.13	8.04523	0.0454545	4.57727	0.508586	0.356818	0.0772727	0.136364	4.57727	0.46188	0.00733623	9.33636	0.363636	0.0909091	0.136364
TCGA-GM-A2DH	CGRQMLLFTTVQYPCRDDKIIF	Primary Tumor	TRA	22	0.227273	0.409091	0.136364	0.227273	0.136364	0.0909091	0.272727	0.5	2648.13	8.04523	0.0454545	4.57727	0.508586	0.356818	0.0772727	0.136364	4.57727	0.46188	0.00733623	9.33636	0.363636	0.0909091	0.136364
TCGA-GM-A2DH	CLLLCSPRRGGSYIPTF	Primary Tumor	TRA	17	0.411765	0.529412	0.117647	0.117647	0.117647	0	0.235294	0.529412	1883.24	8.95587	0.117647	4.91765	0.546405	0.344118	0.417647	0.117647	4.91765	0.315573	0.0292887	83.6765	0.352941	0.352941	0.176471
TCGA-GM-A2DH	CAMRAVMDSNYQLIW	Primary Tumor	TRA	15	0.266667	0.466667	0.133333	0.133333	0.0666667	0.0666667	0.133333	0.4	1801.12	5.82867	0	4.79333	0.532593	0.33	0.293333	0.133333	4.79333	0.474814	0.0210606	17.1467	0.333333	0.133333	0.333333
TCGA-GM-A2DH	CRNLLLCRPLSGGYNKLIF	Primary Tumor	TRA	19	0.263158	0.421053	0.105263	0.157895	0.157895	0	0.210526	0.368421	2180.64	9.50214	0.157895	4.86316	0.540351	0.308947	0.363158	0.105263	4.86316	0.252082	0.00578789	36.1263	0.421053	0.315789	0.263158
TCGA-GM-A2DH	CTTASGDDTSNTGKLIF	Primary Tumor	TRA	17	0.588235	0.764706	0.0588235	0.176471	0.0588235	0.117647	0.176471	0.705882	1730.85	4.20782	-0.0588235	4.25294	0.472549	0.286471	-0.247059	0.0588235	4.25294	0.343219	0.0557427	-0.229412	0.176471	0.294118	0.117647
TCGA-GM-A2DH	CTTASGDDTSNTGKLIF	Primary Tumor	TRA	17	0.588235	0.764706	0.0588235	0.176471	0.0588235	0.117647	0.176471	0.705882	1730.85	4.20782	-0.0588235	4.25294	0.472549	0.286471	-0.247059	0.0588235	4.25294	0.343219	0.0557427	-0.229412	0.176471	0.294118	0.117647
TCGA-GM-A2DH	CAYSLTDKLIF	Primary Tumor	TRA	11	0.363636	0.454545	0.181818	0.181818	0.0909091	0.0909091	0.181818	0.454545	1273.5	5.82794	0	5.31818	0.590909	0.302727	0.818182	0.181818	5.31818	0.562986	0.00517196	-6.34545	0.454545	0.0909091	0.272727
TCGA-GM-A2DH	CAYSLTDKLIF	Primary Tumor	TRA	11	0.363636	0.454545	0.181818	0.181818	0.0909091	0.0909091	0.181818	0.454545	1273.5	5.82794	0	5.31818	0.590909	0.302727	0.818182	0.181818	5.31818	0.562986	0.00517196	-6.34545	0.454545	0.0909091	0.272727
TCGA-GM-A2DH	CAYSLTDKLIF	Primary Tumor	TRA	11	0.363636	0.454545	0.181818	0.181818	0.0909091	0.0909091	0.181818	0.454545	1273.5	5.82794	0	5.31818	0.590909	0.302727	0.818182	0.181818	5.31818	0.562986	0.00517196	-6.34545	0.454545	0.0909091	0.272727
TCGA-GM-A2DH	CCSMDSNYQLIW	Primary Tumor	TRA	12	0.333333	0.5	0.166667	0.0833333	0	0.0833333	0.0833333	0.333333	1462.67	3.79974	-0.0833333	4.575	0.508333	0.2975	0.075	0.166667	4.575	0.954546	0.00902778	25.2167	0.333333	0.25	0.166667
TCGA-A8-A0A7	CAVVISSGSARQLTF	Primary Tumor	TRA	15	0.533333	0.666667	0.0666667	0.0666667	0.0666667	0	0.0666667	0.6	1538.77	8.24969	0.0666667	5.44	0.604444	0.31	0.94	0.0666667	5.44	0.982605	0.00886364	43.24	0.333333	0.266667	0.2
TCGA-A8-A0A7	CGARSAGGTSYGKLTF	Primary Tumor	TRA	16	0.6875	0.6875	0.125	0.125	0.125	0	0.125	0.75	1575.74	9.31244	0.125	4.4	0.488889	0.264375	-0.1	0.125	4.4	0.39778	0.00724116	25.7312	0.1875	0.375	0.1875
TCGA-A8-A0A7	CAARGNEKLTF	Primary Tumor	TRA	11	0.454545	0.545455	0.0909091	0.272727	0.181818	0.0909091	0.272727	0.636364	1209.38	8.22223	0.0909091	4.15455	0.461616	0.316364	-0.345455	0.0909091	4.15455	0.0778188	0.00635612	-2.84545	0.181818	0.181818	0.363636
TCGA-A8-A0A7	CGNKLVF	Primary Tumor	TRA	7	0.285714	0.571429	0.142857	0.142857	0.142857	0	0.142857	0.285714	779.947	8.22223	0.142857	5.28571	0.587302	0.287143	0.785714	0.142857	5.28571	0.0928479	0.0019161	18.1429	0.428571	0.285714	0.142857
TCGA-A8-A0A7	CGNKLVF	Primary Tumor	TRA	7	0.285714	0.571429	0.142857	0.142857	0.142857	0	0.142857	0.285714	779.947	8.22223	0.142857	5.28571	0.587302	0.287143	0.785714	0.142857	5.28571	0.0928479	0.0019161	18.1429	0.428571	0.285714	0.142857
TCGA-A8-A0A7	CAVNIGTASKLTF	Primary Tumor	TRA	13	0.538462	0.692308	0.0769231	0.0769231	0.0769231	0	0.0769231	0.538462	1324.55	8.22223	0.0769231	5.37692	0.597436	0.309231	0.876923	0.0769231	5.37692	0.976728	0.00850263	39.4615	0.307692	0.230769	0.230769
TCGA-A8-A0A7	CAVNIGTASKLTF	Primary Tumor	TRA	13	0.538462	0.692308	0.0769231	0.0769231	0.0769231	0	0.0769231	0.538462	1324.55	8.22223	0.0769231	5.37692	0.597436	0.309231	0.876923	0.0769231	5.37692	0.976728	0.00850263	39.4615	0.307692	0.230769	0.230769
TCGA-A8-A0A7	CCDQDTGRRALTF	Primary Tumor	TRA	13	0.461538	0.615385	0.0769231	0.307692	0.153846	0.153846	0.307692	0.692308	1485.64	5.9472	0	3.89231	0.432479	0.303077	-0.607692	0.0769231	3.89231	0.0307751	0.0911034	74.3231	0.153846	0.0769231	0.153846
TCGA-A8-A0A7	CLLLCRYTNAGKSTF	Primary Tumor	TRA	15	0.466667	0.533333	0.133333	0.133333	0.133333	0	0.133333	0.466667	1690	8.90326	0.133333	4.84667	0.538519	0.282	0.346667	0.133333	4.84667	0.188148	0.0039899	4.03333	0.333333	0.2	0.266667
TCGA-A8-A0A7	CAMREVPYMYSGGGADGLTF	Primary Tumor	TRA	20	0.45	0.6	0.15	0.15	0.05	0.1	0.2	0.6	2125.4	4.37018	-0.05	4.595	0.510556	0.3095	0.095	0.15	4.595	0.398005	0.0109722	59.19	0.25	0.3	0.3
TCGA-A8-A0A7	CAMREGLSNNDMRF	Primary Tumor	TRA	14	0.285714	0.5	0.0714286	0.285714	0.142857	0.142857	0.285714	0.5	1643.87	6.06329	0	3.82143	0.424603	0.295714	-0.678571	0.0714286	3.82143	0.144448	0.0106296	-1.48571	0.142857	0.285714	0.357143
TCGA-A8-A0A7	CALVYTGGGNKLTF	Primary Tumor	TRA	14	0.5	0.642857	0.142857	0.0714286	0.0714286	0	0.0714286	0.5	1443.67	8.19745	0.0714286	5.04286	0.560317	0.269286	0.542857	0.142857	5.04286	0.945517	0.00826959	23	0.357143	0.285714	0.214286
TCGA-A8-A0A7	CSNRNSNYQLIW	Primary Tumor	TRA	12	0.25	0.5	0.166667	0.0833333	0.0833333	0	0.0833333	0.333333	1497.63	8.22198	0.0833333	3.54167	0.393519	0.298333	-0.958333	0.166667	3.54167	0.965909	0.00861111	19.45	0.333333	0.416667	0.0833333
TCGA-A8-A0A7	CCPITQGGSEKLVF	Primary Tumor	TRA	14	0.428571	0.571429	0.0714286	0.142857	0.0714286	0.0714286	0.214286	0.571429	1481.74	5.98737	0	4.89286	0.543651	0.358571	0.392857	0.0714286	4.89286	0.307201	0.00354321	34.1643	0.285714	0.285714	0.142857
TCGA-A8-A0A7	CSVLLCSRQWGGSEKLVF	Primary Tumor	TRA	18	0.388889	0.5	0.111111	0.166667	0.111111	0.0555556	0.166667	0.5	2012.36	8.05853	0.0555556	4.95	0.55	0.293889	0.45	0.111111	4.95	0.41636	0.0131438	37.9222	0.388889	0.277778	0.222222
TCGA-A8-A0A7	CSVLLCSRQWGGSEKLVF	Primary Tumor	TRA	18	0.388889	0.5	0.111111	0.166667	0.111111	0.0555556	0.166667	0.5	2012.36	8.05853	0.0555556	4.95	0.55	0.293889	0.45	0.111111	4.95	0.41636	0.0131438	37.9222	0.388889	0.277778	0.222222
TCGA-A8-A0A7	CASFSGGSNYKLTF	Primary Tumor	TRA	14	0.571429	0.642857	0.214286	0.0714286	0.0714286	0	0.0714286	0.571429	1481.63	8.19745	0.0714286	4.57857	0.50873	0.255714	0.0785714	0.214286	4.57857	0.945517	0.00826959	20.85	0.285714	0.428571	0.142857
TCGA-A8-A0A7	CAGAAAGGTSYGKLTF	Primary Tumor	TRA	16	0.75	0.75	0.125	0.0625	0.0625	0	0.0625	0.75	1474.64	8.19745	0.0625	4.95625	0.550694	0.271875	0.45625	0.125	4.95625	0.90155	0.00766888	-1.73125	0.1875	0.3125	0.3125
TCGA-A8-A0A7	CAVTSSGGTSYGKLTF	Primary Tumor	TRA	16	0.6875	0.75	0.125	0.0625	0.0625	0	0.0625	0.6875	1578.74	8.19745	0.0625	4.7625	0.529167	0.26875	0.2625	0.125	4.7625	0.90155	0.00766888	10.3063	0.25	0.375	0.125
TCGA-A8-A0A7	CRECDNNDMRF	Primary Tumor	TRA	11	0.181818	0.545455	0.0909091	0.454545	0.181818	0.272727	0.454545	0.454545	1402.54	4.55804	-0.0909091	2.97273	0.330303	0.304545	-1.52727	0.0909091	2.97273	0.00665448	0.0596219	59.6909	0.0909091	0.181818	0.181818
TCGA-A8-A0A7	CAVRDKYGGSQGNLIF	Primary Tumor	TRA	16	0.375	0.5625	0.125	0.1875	0.125	0.0625	0.1875	0.5625	1727.94	8.19733	0.0625	4.3375	0.481944	0.295625	-0.1625	0.125	4.3375	0.793759	0.00304907	13.2063	0.3125	0.3125	0.125
TCGA-A8-A0A7	CVVNNAGNMLAF	Primary Tumor	TRA	12	0.333333	0.75	0.0833333	0	0	0	0	0.25	1252.46	5.51813	0	5.50833	0.612037	0.29	1.00833	0.0833333	5.50833	-1	0	-4.19167	0.333333	0.333333	0.333333
TCGA-A8-A0A7	CIVRVGGGNAGNMLTF	Primary Tumor	TRA	16	0.4375	0.6875	0.0625	0.0625	0.0625	0	0.0625	0.4375	1608.88	8.24969	0.0625	5.24375	0.582639	0.27	0.74375	0.0625	5.24375	0.90155	0.00766888	11.2875	0.3125	0.375	0.1875
TCGA-A8-A0A7	CAMRENNKVDSNYQLIW	Primary Tumor	TRA	17	0.176471	0.470588	0.117647	0.235294	0.117647	0.117647	0.235294	0.411765	2084.34	6.06183	0	3.69412	0.410458	0.337647	-0.805882	0.117647	3.69412	0.382792	0.00594848	16.4	0.294118	0.235294	0.235294
TCGA-A8-A0A7	CAQRDRDDKIIF	Primary Tumor	TRA	12	0.166667	0.416667	0.0833333	0.5	0.25	0.25	0.5	0.666667	1479.66	6.03278	0	3.6	0.4	0.36	-0.9	0.0833333	3.6	0.553254	0.0013552	-11.2667	0.25	0	0.0833333
TCGA-A8-A0A7	CALSGADNYGQNFVF	Primary Tumor	TRA	15	0.4	0.666667	0.2	0.0666667	0	0.0666667	0.0666667	0.466667	1605.73	3.79987	-0.0666667	4.68667	0.520741	0.272	0.186667	0.2	4.68667	1	0.00914141	-17.6667	0.333333	0.333333	0.2
TCGA-A8-A0A7	CAVRTGNQGGKLIF	Primary Tumor	TRA	14	0.428571	0.571429	0.0714286	0.142857	0.142857	0	0.142857	0.571429	1463.7	9.50775	0.142857	4.66429	0.518254	0.304286	0.164286	0.0714286	4.66429	0.229255	0.00473268	-11.5429	0.285714	0.285714	0.142857
TCGA-A8-A0A7	CAVSALSNDYKLSF	Primary Tumor	TRA	14	0.428571	0.642857	0.142857	0.142857	0.0714286	0.0714286	0.142857	0.5	1517.7	5.82794	0	4.93571	0.548413	0.295	0.435714	0.142857	4.93571	0.761836	0.00908642	3.22143	0.357143	0.285714	0.285714
TCGA-A8-A0A7	CAVEDLRGYKLSF	Primary Tumor	TRA	13	0.307692	0.461538	0.153846	0.307692	0.153846	0.153846	0.307692	0.538462	1500.72	6.06183	0	4.57692	0.508547	0.303077	0.0769231	0.153846	4.57692	0.0523253	0.0638349	19.2692	0.384615	0.153846	0.307692
TCGA-A8-A0A7	CAVGGYSTLTF	Primary Tumor	TRA	11	0.636364	0.727273	0.181818	0	0	0	0	0.545455	1118.26	5.5174	0	5.48182	0.609091	0.255455	0.981818	0.181818	5.48182	-1	0	16.0909	0.363636	0.272727	0.181818
TCGA-A8-A0A7	CLVGNWGGGFKTIF	Primary Tumor	TRA	14	0.428571	0.571429	0.214286	0.0714286	0.0714286	0	0.0714286	0.428571	1498.75	8.22223	0.0714286	5.21429	0.579365	0.252143	0.714286	0.214286	5.21429	0.945517	0.00826959	2.99286	0.428571	0.357143	0.0714286
TCGA-GM-A2DL	CALDDSGGYQKVTF	Primary Tumor	TRA	14	0.428571	0.642857	0.142857	0.214286	0.0714286	0.142857	0.214286	0.642857	1503.63	4.20782	-0.0714286	4.29286	0.476984	0.298571	-0.207143	0.142857	4.29286	0.163533	0.0630519	22.4786	0.285714	0.214286	0.142857
TCGA-GM-A2DL	CALDDSGGYQKVTF	Primary Tumor	TRA	14	0.428571	0.642857	0.142857	0.214286	0.0714286	0.142857	0.214286	0.642857	1503.63	4.20782	-0.0714286	4.29286	0.476984	0.298571	-0.207143	0.142857	4.29286	0.163533	0.0630519	22.4786	0.285714	0.214286	0.142857
TCGA-GM-A2DL	CALDDSGGYQKVTF	Primary Tumor	TRA	14	0.428571	0.642857	0.142857	0.214286	0.0714286	0.142857	0.214286	0.642857	1503.63	4.20782	-0.0714286	4.29286	0.476984	0.298571	-0.207143	0.142857	4.29286	0.163533	0.0630519	22.4786	0.285714	0.214286	0.142857
TCGA-GM-A2DL	CAVRKTSGTYKYIF	Primary Tumor	TRA	14	0.428571	0.5	0.214286	0.214286	0.214286	0	0.214286	0.571429	1636.91	9.62872	0.214286	4.37857	0.486508	0.327143	-0.121429	0.214286	4.37857	0.163533	0.0130242	3.22143	0.357143	0.142857	0.0714286
TCGA-GM-A2DL	CVPEARDTGRRALTF	Primary Tumor	TRA	15	0.4	0.6	0.0666667	0.333333	0.2	0.133333	0.4	0.733333	1691.91	8.24945	0.0666667	4.03333	0.448148	0.361333	-0.466667	0.0666667	4.03333	0.0202698	0.041079	59.4667	0.2	0.133333	0.266667
TCGA-GM-A2DL	CVPEARDTGRRALTF	Primary Tumor	TRA	15	0.4	0.6	0.0666667	0.333333	0.2	0.133333	0.4	0.733333	1691.91	8.24945	0.0666667	4.03333	0.448148	0.361333	-0.466667	0.0666667	4.03333	0.0202698	0.041079	59.4667	0.2	0.133333	0.266667
TCGA-GM-A2DL	CVPEARDTGRRALTF	Primary Tumor	TRA	15	0.4	0.6	0.0666667	0.333333	0.2	0.133333	0.4	0.733333	1691.91	8.24945	0.0666667	4.03333	0.448148	0.361333	-0.466667	0.0666667	4.03333	0.0202698	0.041079	59.4667	0.2	0.133333	0.266667
TCGA-E2-A14V	CAVNPRRPDSWGKLQF	Primary Tumor	TRA	16	0.25	0.5625	0.125	0.25	0.1875	0.0625	0.375	0.625	1874.13	9.50409	0.125	3.65	0.405556	0.40375	-0.85	0.125	3.65	0.15592	0.0226078	56.5938	0.25	0.3125	0.125
TCGA-E2-A14V	CSLPLYGNNRLAF	Primary Tumor	TRA	13	0.307692	0.538462	0.153846	0.0769231	0.0769231	0	0.153846	0.384615	1467.69	8.22198	0.0769231	4.72308	0.524786	0.311538	0.223077	0.153846	4.72308	0.0968171	0.00850263	10.9846	0.384615	0.384615	0.307692
TCGA-E2-A14V	CALRSAGGTSYGKLTF	Primary Tumor	TRA	16	0.625	0.625	0.125	0.125	0.125	0	0.125	0.6875	1631.85	9.31244	0.125	4.6625	0.518056	0.27125	0.1625	0.125	4.6625	0.39778	0.00724116	43.075	0.25	0.3125	0.25
TCGA-E2-A14V	CTIASPYLPGSARQLTF	Primary Tumor	TRA	17	0.470588	0.588235	0.117647	0.0588235	0.0588235	0	0.176471	0.647059	1825.09	8.22198	0.0588235	4.8	0.533333	0.378824	0.3	0.117647	4.8	0.181413	0.0083297	84.3529	0.294118	0.294118	0.235294
TCGA-E2-A14V	CGADYSGGYQKVTF	Primary Tumor	TRA	14	0.5	0.642857	0.214286	0.142857	0.0714286	0.0714286	0.142857	0.642857	1495.61	5.82733	0	4.15	0.461111	0.287143	-0.35	0.214286	4.15	0.229255	0.0283457	-3.40714	0.285714	0.285714	0.0714286
TCGA-E2-A14V	CSKRGNAGNMLTF	Primary Tumor	TRA	13	0.461538	0.615385	0.0769231	0.153846	0.153846	0	0.153846	0.538462	1398.61	9.50775	0.153846	4.12308	0.45812	0.283846	-0.376923	0.0769231	4.12308	0.88717	0.0287595	24.2077	0.153846	0.384615	0.230769
TCGA-E2-A14V	CVVYGMDSSYKLIF	Primary Tumor	TRA	14	0.285714	0.5	0.214286	0.142857	0.0714286	0.0714286	0.142857	0.357143	1624.92	5.82733	0	5.35	0.594444	0.297143	0.85	0.214286	5.35	0.358186	0.0232593	13.9	0.5	0.214286	0.142857
TCGA-E2-A14V	CVVYGMDSSYKLIF	Primary Tumor	TRA	14	0.285714	0.5	0.214286	0.142857	0.0714286	0.0714286	0.142857	0.357143	1624.92	5.82733	0	5.35	0.594444	0.297143	0.85	0.214286	5.35	0.358186	0.0232593	13.9	0.5	0.214286	0.142857
TCGA-BH-A1EY	CAVEDLGGATNKLIF	Primary Tumor	TRA	15	0.4	0.6	0.0666667	0.2	0.0666667	0.133333	0.2	0.533333	1550.77	4.37018	-0.0666667	5.12	0.568889	0.303333	0.62	0.0666667	5.12	0.290505	0.057775	24.8467	0.333333	0.2	0.333333
TCGA-BH-A1EY	CAVEDLGGATNKLIF	Primary Tumor	TRA	15	0.4	0.6	0.0666667	0.2	0.0666667	0.133333	0.2	0.533333	1550.77	4.37018	-0.0666667	5.12	0.568889	0.303333	0.62	0.0666667	5.12	0.290505	0.057775	24.8467	0.333333	0.2	0.333333
TCGA-BH-A1EY	CNERGFFSCGYNKLIF	Primary Tumor	TRA	16	0.3125	0.4375	0.25	0.1875	0.125	0.0625	0.1875	0.375	1898.17	8.04547	0.0625	4.49375	0.499306	0.268125	-0.00625	0.25	4.49375	0.472249	0.0117661	28.6313	0.375	0.3125	0.125
TCGA-BH-A1EY	CALHTGTASKLTF	Primary Tumor	TRA	13	0.615385	0.615385	0.153846	0.0769231	0.0769231	0	0.0769231	0.692308	1349.55	8.23114	0.0769231	4.96923	0.552137	0.286923	0.469231	0.0769231	4.96923	0.976728	0.00850263	-6.66923	0.230769	0.153846	0.307692
TCGA-BH-A1EY	CAVTPSSGTYKYIF	Primary Tumor	TRA	14	0.5	0.642857	0.214286	0.0714286	0.0714286	0	0.142857	0.571429	1536.75	8.17523	0.0714286	4.80714	0.534127	0.348571	0.307143	0.214286	4.80714	0.115471	0.00826959	24.6714	0.357143	0.285714	0.0714286
TCGA-BH-A1EY	CAGGSQGNLIF	Primary Tumor	TRA	11	0.545455	0.636364	0.0909091	0	0	0	0	0.545455	1066.19	5.51813	0	5.08182	0.564646	0.259091	0.581818	0.0909091	5.08182	-1	0	30.1	0.272727	0.454545	0.181818
TCGA-BH-A1EY	CAGGSQGNLIF	Primary Tumor	TRA	11	0.545455	0.636364	0.0909091	0	0	0	0	0.545455	1066.19	5.51813	0	5.08182	0.564646	0.259091	0.581818	0.0909091	5.08182	-1	0	30.1	0.272727	0.454545	0.181818
TCGA-BH-A1EY	CAASERVYGNKLVF	Primary Tumor	TRA	14	0.357143	0.571429	0.142857	0.214286	0.142857	0.0714286	0.214286	0.5	1556.78	8.19757	0.0714286	4.72857	0.525397	0.316429	0.228571	0.142857	4.72857	0.10548	0.0183076	16.3786	0.357143	0.214286	0.285714
TCGA-BH-A1EY	CGLASSGSARQLTF	Primary Tumor	TRA	14	0.642857	0.642857	0.0714286	0.0714286	0.0714286	0	0.0714286	0.714286	1397.56	8.24969	0.0714286	4.82857	0.536508	0.275	0.328571	0.0714286	4.82857	0.991678	0.00906148	45.6143	0.214286	0.357143	0.285714
TCGA-BH-A1EY	CAVGTTGNQFYF	Primary Tumor	TRA	12	0.5	0.666667	0.25	0	0	0	0	0.5	1307.43	5.5174	0	4.8	0.533333	0.275	0.3	0.25	4.8	-1	0	-4.5325	0.333333	0.25	0.0833333
TCGA-BH-A1EY	CALHTGTASKLTF	Primary Tumor	TRA	13	0.615385	0.615385	0.153846	0.0769231	0.0769231	0	0.0769231	0.692308	1349.55	8.23114	0.0769231	4.96923	0.552137	0.286923	0.469231	0.0769231	4.96923	0.976728	0.00850263	-6.66923	0.230769	0.153846	0.307692
TCGA-BH-A1EY	CRGNFKSLMVSGTYKYIF	Primary Tumor	TRA	18	0.333333	0.444444	0.222222	0.166667	0.166667	0	0.166667	0.444444	2114.49	9.62872	0.166667	4.55556	0.506173	0.294444	0.0555556	0.222222	4.55556	0.365414	0.0116117	-21.4056	0.388889	0.277778	0.111111
TCGA-BH-A1EY	CAARGETGANNLFF	Primary Tumor	TRA	14	0.5	0.642857	0.142857	0.142857	0.0714286	0.0714286	0.142857	0.571429	1470.61	5.99493	0	4.55714	0.506349	0.275714	0.0571429	0.142857	4.55714	0.761836	0.00908642	-14.2929	0.214286	0.285714	0.357143
TCGA-BH-A1EY	CAVEESNYQLIW	Primary Tumor	TRA	12	0.25	0.416667	0.166667	0.166667	0	0.166667	0.166667	0.416667	1454.6	3.79498	-0.166667	4.48333	0.498148	0.335	-0.0166667	0.166667	4.48333	0.71572	0.0307937	52.3833	0.416667	0.166667	0.333333
TCGA-BH-A1EY	CAVGANYGQNFVF	Primary Tumor	TRA	13	0.384615	0.692308	0.230769	0	0	0	0	0.384615	1389.53	5.5174	0	5.07692	0.564103	0.283846	0.576923	0.230769	5.07692	-1	0	-21.9231	0.384615	0.307692	0.153846
TCGA-BH-A1EY	CHLLLSTDSWEKLQF	Primary Tumor	TRA	15	0.266667	0.333333	0.2	0.2	0.0666667	0.133333	0.2	0.533333	1820.07	5.32025	-0.0666667	4.48	0.497778	0.296	-0.02	0.133333	4.48	0.46031	0.0192003	54.9533	0.4	0.133333	0.333333
TCGA-BH-A1EY	CGSRTGGYQKVTF	Primary Tumor	TRA	13	0.538462	0.615385	0.153846	0.153846	0.153846	0	0.153846	0.692308	1403.56	9.31244	0.153846	3.95385	0.439316	0.292308	-0.546154	0.153846	3.95385	0.0968171	0.00234385	16.9077	0.230769	0.307692	0
TCGA-BH-A1EY	CAENGSGYNKLIF	Primary Tumor	TRA	13	0.384615	0.538462	0.153846	0.153846	0.0769231	0.0769231	0.153846	0.461538	1415.57	5.99359	0	4.35385	0.483761	0.283846	-0.146154	0.153846	4.35385	0.233903	0.0277083	2.82308	0.307692	0.384615	0.230769
TCGA-AN-A0FF	CLLPLCCERWGSGGYQKVTF	Primary Tumor	TRA	20	0.4	0.5	0.15	0.15	0.1	0.05	0.2	0.5	2260.66	7.94904	0.05	4.7	0.522222	0.3185	0.2	0.15	4.7	0.307378	0.0109722	51.82	0.35	0.25	0.2
TCGA-AN-A0FF	CAVSDLHSGGGADGLTF	Primary Tumor	TRA	17	0.588235	0.764706	0.117647	0.117647	0	0.117647	0.117647	0.705882	1606.71	4.19672	-0.117647	4.88824	0.543137	0.244118	0.388235	0.0588235	4.88824	0.327245	0.0063601	21.2	0.235294	0.352941	0.235294
TCGA-AN-A0FF	CLLLCRDPRAGTALIF	Primary Tumor	TRA	16	0.375	0.5	0.0625	0.1875	0.125	0.0625	0.25	0.5	1762.15	8.07208	0.0625	5.49375	0.610417	0.329375	0.99375	0.0625	5.49375	0.444418	0.00747738	11.3938	0.375	0.125	0.375
TCGA-AN-A0FF	CAVSDQDNAGKSTF	Primary Tumor	TRA	14	0.5	0.785714	0.0714286	0.214286	0.0714286	0.142857	0.214286	0.714286	1442.51	4.20782	-0.0714286	3.96429	0.440476	0.317143	-0.535714	0.0714286	3.96429	0.10548	0.0553235	25.7929	0.142857	0.285714	0.142857
TCGA-AN-A0FF	CAALSAGNNRKLIW	Primary Tumor	TRA	14	0.428571	0.571429	0.0714286	0.142857	0.142857	0	0.142857	0.5	1516.77	9.50775	0.142857	4.67857	0.519841	0.309286	0.178571	0.0714286	4.67857	0.922771	0.0311189	-2.84286	0.285714	0.285714	0.357143
TCGA-AN-A0FF	CVVRATNFGNEKLTF	Primary Tumor	TRA	15	0.333333	0.6	0.133333	0.2	0.133333	0.0666667	0.2	0.466667	1698.94	8.22223	0.0666667	4.59333	0.51037	0.31	0.0933333	0.133333	4.59333	0.290505	0.0126571	-18.8267	0.333333	0.2	0.2
TCGA-AN-A0FF	CAALSAGNNRKLIW	Primary Tumor	TRA	14	0.428571	0.571429	0.0714286	0.142857	0.142857	0	0.142857	0.5	1516.77	9.50775	0.142857	4.67857	0.519841	0.309286	0.178571	0.0714286	4.67857	0.922771	0.0311189	-2.84286	0.285714	0.285714	0.357143
TCGA-AN-A0FF	CAALSAGNNRKLIW	Primary Tumor	TRA	14	0.428571	0.571429	0.0714286	0.142857	0.142857	0	0.142857	0.5	1516.77	9.50775	0.142857	4.67857	0.519841	0.309286	0.178571	0.0714286	4.67857	0.922771	0.0311189	-2.84286	0.285714	0.285714	0.357143
TCGA-AN-A0FF	CAVSDQDNAGKSTF	Primary Tumor	TRA	14	0.5	0.785714	0.0714286	0.214286	0.0714286	0.142857	0.214286	0.714286	1442.51	4.20782	-0.0714286	3.96429	0.440476	0.317143	-0.535714	0.0714286	3.96429	0.10548	0.0553235	25.7929	0.142857	0.285714	0.142857
TCGA-AN-A0FF	CLLLCRDPRAGTALIF	Primary Tumor	TRA	16	0.375	0.5	0.0625	0.1875	0.125	0.0625	0.25	0.5	1762.15	8.07208	0.0625	5.49375	0.610417	0.329375	0.99375	0.0625	5.49375	0.444418	0.00747738	11.3938	0.375	0.125	0.375
TCGA-AN-A0FF	CAEKASGGSYIPTF	Primary Tumor	TRA	14	0.571429	0.642857	0.142857	0.142857	0.0714286	0.0714286	0.214286	0.714286	1430.58	5.99359	0	4.5	0.5	0.345714	0	0.142857	4.5	0.43299	0.00354321	24.8571	0.214286	0.357143	0.214286
TCGA-GM-A2DF	CAVINSGGYQKVTF	Primary Tumor	TRA	14	0.428571	0.642857	0.142857	0.0714286	0.0714286	0	0.0714286	0.5	1486.69	8.19745	0.0714286	4.89286	0.543651	0.313571	0.392857	0.142857	4.89286	0.945517	0.00826959	8.72143	0.357143	0.285714	0.0714286
TCGA-GM-A2DF	CALSGRNYGQNFVF	Primary Tumor	TRA	14	0.357143	0.571429	0.214286	0.0714286	0.0714286	0	0.0714286	0.428571	1575.75	8.22198	0.0714286	4.5	0.5	0.270714	-6.34413e-17	0.214286	4.5	1	0.00928193	1.3	0.357143	0.357143	0.142857
TCGA-GM-A2DF	CALSGRNYGQNFVF	Primary Tumor	TRA	14	0.357143	0.571429	0.214286	0.0714286	0.0714286	0	0.0714286	0.428571	1575.75	8.22198	0.0714286	4.5	0.5	0.270714	-6.34413e-17	0.214286	4.5	1	0.00928193	1.3	0.357143	0.357143	0.142857
TCGA-GM-A2DF	CSVLLCSKRVLNTGNQFYF	Primary Tumor	TRA	19	0.315789	0.526316	0.157895	0.105263	0.105263	0	0.105263	0.368421	2192.56	8.90326	0.105263	4.89474	0.54386	0.291053	0.394737	0.157895	4.89474	0.978316	0.027833	22.4479	0.421053	0.263158	0.157895
TCGA-GM-A2DF	CTSVQQARHPYNNNDMRF	Primary Tumor	TRA	18	0.222222	0.555556	0.166667	0.166667	0.111111	0.0555556	0.222222	0.555556	2181.37	8.23065	0.0555556	3.14444	0.349383	0.36	-1.35556	0.111111	3.14444	0.328981	0.0151388	43.1667	0.166667	0.277778	0.111111
TCGA-GM-A2DF	CAGHTIQTGANNLFF	Primary Tumor	TRA	15	0.466667	0.6	0.2	0	0	0	0	0.533333	1593.76	6.73187	0	4.77333	0.53037	0.275333	0.273333	0.133333	4.77333	-1	0	-7.01333	0.266667	0.266667	0.2
TCGA-GM-A2DF	CTSVQQARHPYNNNDMRF	Primary Tumor	TRA	18	0.222222	0.555556	0.166667	0.166667	0.111111	0.0555556	0.222222	0.555556	2181.37	8.23065	0.0555556	3.14444	0.349383	0.36	-1.35556	0.111111	3.14444	0.328981	0.0151388	43.1667	0.166667	0.277778	0.111111
TCGA-A8-A06X	CLLLCSKYENTGFQKLVF	Primary Tumor	TRA	18	0.277778	0.388889	0.166667	0.166667	0.111111	0.0555556	0.166667	0.388889	2106.51	8.03314	0.0555556	4.97222	0.552469	0.303889	0.472222	0.166667	4.97222	0.309349	0.0163028	1.80556	0.444444	0.166667	0.277778
TCGA-A8-A06X	CAFMNPLDQFYF	Primary Tumor	TRA	12	0.166667	0.416667	0.333333	0.0833333	0	0.0833333	0.166667	0.333333	1495.72	3.79987	-0.0833333	4.91667	0.546296	0.34	0.416667	0.333333	4.91667	0.341364	0.00902778	27.6508	0.416667	0.166667	0.25
TCGA-A8-A06X	CAFMNPLDQFYF	Primary Tumor	TRA	12	0.166667	0.416667	0.333333	0.0833333	0	0.0833333	0.166667	0.333333	1495.72	3.79987	-0.0833333	4.91667	0.546296	0.34	0.416667	0.333333	4.91667	0.341364	0.00902778	27.6508	0.416667	0.166667	0.25
TCGA-A8-A06X	CAFMNPLDQFYF	Primary Tumor	TRA	12	0.166667	0.416667	0.333333	0.0833333	0	0.0833333	0.166667	0.333333	1495.72	3.79987	-0.0833333	4.91667	0.546296	0.34	0.416667	0.333333	4.91667	0.341364	0.00902778	27.6508	0.416667	0.166667	0.25
TCGA-A8-A06X	CLLLCSIREHGGGTSYGKLTF	Primary Tumor	TRA	21	0.47619	0.47619	0.142857	0.142857	0.0952381	0.047619	0.142857	0.571429	2255.62	8.05511	0.047619	4.80952	0.534392	0.260476	0.309524	0.0952381	4.80952	0.638129	0.0104066	11.6238	0.333333	0.285714	0.238095
TCGA-A8-A06X	CLLLCSKNGGSQGNLIF	Primary Tumor	TRA	17	0.411765	0.529412	0.0588235	0.0588235	0.0588235	0	0.0588235	0.411765	1767.08	8.05841	0.0588235	5.10588	0.56732	0.265882	0.605882	0.0588235	5.10588	1	0.00867011	25.4941	0.352941	0.411765	0.235294
TCGA-D8-A142	CLVGWSGGGNKLTF	Primary Tumor	TRA	14	0.5	0.642857	0.142857	0.0714286	0.0714286	0	0.0714286	0.5	1438.65	8.22223	0.0714286	4.90714	0.545238	0.246429	0.407143	0.142857	4.90714	0.945517	0.00826959	57.0214	0.357143	0.428571	0.142857
TCGA-D8-A142	CLVGWSGGGNKLTF	Primary Tumor	TRA	14	0.5	0.642857	0.142857	0.0714286	0.0714286	0	0.0714286	0.5	1438.65	8.22223	0.0714286	4.90714	0.545238	0.246429	0.407143	0.142857	4.90714	0.945517	0.00826959	57.0214	0.357143	0.428571	0.142857
TCGA-D8-A142	CAVTPATGTASKLTF	Primary Tumor	TRA	15	0.666667	0.8	0.0666667	0.0666667	0.0666667	0	0.133333	0.733333	1467.69	8.22223	0.0666667	5.11333	0.568148	0.358	0.613333	0.0666667	5.11333	0.24067	0.0079798	7.76	0.2	0.2	0.266667
TCGA-D8-A142	CAVALNNAGNMLTF	Primary Tumor	TRA	14	0.428571	0.714286	0.0714286	0	0	0	0	0.357143	1438.67	5.51813	0	5.41429	0.601587	0.287143	0.914286	0.0714286	5.41429	-1	0	12.0357	0.285714	0.285714	0.428571
TCGA-D8-A142	CAVATNNDMRF	Primary Tumor	TRA	11	0.363636	0.727273	0.0909091	0.181818	0.0909091	0.0909091	0.181818	0.454545	1241.4	5.82941	0	4.43636	0.492929	0.313636	-0.0636364	0.0909091	4.43636	0.645799	0.0103439	-11.4273	0.181818	0.181818	0.272727
TCGA-D8-A142	CLLLCSKWGNAGNMLTF	Primary Tumor	TRA	17	0.411765	0.529412	0.117647	0.0588235	0.0588235	0	0.0588235	0.352941	1871.25	8.05841	0.0588235	5.24118	0.582353	0.266471	0.741176	0.117647	5.24118	1	0.00867011	11.9118	0.352941	0.294118	0.352941
TCGA-D8-A142	CAGGGGSYIPTF	Primary Tumor	TRA	12	0.666667	0.75	0.166667	0	0	0	0.0833333	0.666667	1129.24	5.5174	0	4.96667	0.551852	0.2925	0.466667	0.166667	4.96667	0.977273	0	47.9	0.25	0.5	0.0833333
TCGA-D8-A142	CILRVPSSGSARQLTF	Primary Tumor	TRA	16	0.4375	0.5625	0.0625	0.125	0.125	0	0.1875	0.625	1735.02	10.3519	0.125	4.8625	0.540278	0.344375	0.3625	0.0625	4.8625	0.156779	0.00619318	89.3125	0.3125	0.3125	0.1875
TCGA-D8-A142	CILRVPSSGSARQLTF	Primary Tumor	TRA	16	0.4375	0.5625	0.0625	0.125	0.125	0	0.1875	0.625	1735.02	10.3519	0.125	4.8625	0.540278	0.344375	0.3625	0.0625	4.8625	0.156779	0.00619318	89.3125	0.3125	0.3125	0.1875
TCGA-D8-A142	CAYRRTFTGANSKLTF	Primary Tumor	TRA	16	0.5	0.5625	0.1875	0.1875	0.1875	0	0.1875	0.625	1836.08	10.0536	0.1875	4.15625	0.461806	0.29625	-0.34375	0.1875	4.15625	0.392036	0.0191146	34.1125	0.25	0.1875	0.1875
TCGA-D8-A142	CAAEGNNAGNMLTF	Primary Tumor	TRA	14	0.5	0.714286	0.0714286	0.0714286	0	0.0714286	0.0714286	0.5	1412.55	3.99969	-0.0714286	4.56429	0.507143	0.281429	0.0642857	0.0714286	4.56429	0.945517	0.00826959	5.97143	0.142857	0.357143	0.428571
TCGA-D8-A142	CAAEGNNAGNMLTF	Primary Tumor	TRA	14	0.5	0.714286	0.0714286	0.0714286	0	0.0714286	0.0714286	0.5	1412.55	3.99969	-0.0714286	4.56429	0.507143	0.281429	0.0642857	0.0714286	4.56429	0.945517	0.00826959	5.97143	0.142857	0.357143	0.428571
TCGA-D8-A142	CSKWGNAGNMLTF	Primary Tumor	TRA	13	0.461538	0.615385	0.153846	0.0769231	0.0769231	0	0.0769231	0.461538	1428.63	8.22223	0.0769231	4.4	0.488889	0.273846	-0.1	0.153846	4.4	0.953456	0.00785626	-2.31538	0.230769	0.384615	0.230769
TCGA-D8-A142	CDHAGNNRKLIW	Primary Tumor	TRA	12	0.25	0.5	0.166667	0.25	0.166667	0.0833333	0.25	0.5	1426.6	8.23102	0.0833333	3.6	0.4	0.300833	-0.9	0.0833333	3.6	0.176664	0.071056	11.0667	0.25	0.25	0.166667
TCGA-D8-A142	CALSEGYGGATNKLIF	Primary Tumor	TRA	16	0.5	0.5625	0.125	0.125	0.0625	0.0625	0.125	0.5625	1643.86	5.99359	0	4.88125	0.542361	0.28	0.38125	0.125	4.88125	0.323482	0.0263636	13.3063	0.3125	0.3125	0.3125
TCGA-D8-A142	CISVLMGPNRDDKIIF	Primary Tumor	TRA	16	0.1875	0.5	0.0625	0.25	0.125	0.125	0.3125	0.4375	1821.17	5.95343	0	4.9375	0.548611	0.36	0.4375	0.0625	4.9375	0.402134	0.00358025	-1.2375	0.375	0.25	0.125
TCGA-D8-A142	CVVNSFNKFYF	Primary Tumor	TRA	11	0.181818	0.545455	0.363636	0.0909091	0.0909091	0	0.0909091	0.181818	1367.57	8.19745	0.0909091	5.07273	0.563636	0.284545	0.572727	0.363636	5.07273	0.830136	0.00846167	53.4009	0.545455	0.272727	0
TCGA-D8-A142	CALRGLTGGGNKLTF	Primary Tumor	TRA	15	0.533333	0.6	0.0666667	0.133333	0.133333	0	0.133333	0.6	1507.76	9.50775	0.133333	4.74	0.526667	0.258667	0.24	0.0666667	4.74	0.335604	0.00626263	40	0.266667	0.333333	0.266667
TCGA-D8-A142	CLVGWSGGGNKLTF	Primary Tumor	TRA	14	0.5	0.642857	0.142857	0.0714286	0.0714286	0	0.0714286	0.5	1438.65	8.22223	0.0714286	4.90714	0.545238	0.246429	0.407143	0.142857	4.90714	0.945517	0.00826959	57.0214	0.357143	0.428571	0.142857
TCGA-D8-A142	CLVGWSGGGNKLTF	Primary Tumor	TRA	14	0.5	0.642857	0.142857	0.0714286	0.0714286	0	0.0714286	0.5	1438.65	8.22223	0.0714286	4.90714	0.545238	0.246429	0.407143	0.142857	4.90714	0.945517	0.00826959	57.0214	0.357143	0.428571	0.142857
TCGA-AO-A03V	CAVRDSNYQLIW	Primary Tumor	TRA	12	0.25	0.5	0.166667	0.166667	0.0833333	0.0833333	0.166667	0.416667	1467.65	5.82867	0	4.4	0.488889	0.321667	-0.1	0.166667	4.4	0.71572	0.00448413	25.2167	0.416667	0.166667	0.166667
TCGA-AO-A03V	CAMSVAGNQFYF	Primary Tumor	TRA	12	0.416667	0.583333	0.25	0	0	0	0	0.416667	1337.52	5.5174	0	5.19167	0.576852	0.291667	0.691667	0.25	5.19167	-1	0	53.3092	0.333333	0.25	0.25
TCGA-AO-A03V	CAGHLGQGAQKLVF	Primary Tumor	TRA	14	0.428571	0.5	0.142857	0.0714286	0.0714286	0	0.0714286	0.642857	1428.66	8.23114	0.0714286	4.88571	0.542857	0.302857	0.385714	0.0714286	4.88571	0.945517	0.00826959	-2.84286	0.285714	0.214286	0.285714
TCGA-AO-A03V	CALNSNSGYALNF	Primary Tumor	TRA	13	0.461538	0.692308	0.153846	0	0	0	0	0.384615	1373.49	5.5174	0	4.70769	0.523077	0.254615	0.207692	0.153846	4.70769	-1	0	9.35385	0.307692	0.461538	0.307692
TCGA-WT-AB41	CGELRFGNEKLTF	Primary Tumor	TRA	13	0.307692	0.384615	0.153846	0.307692	0.153846	0.153846	0.307692	0.538462	1513.72	6.13605	0	4.13846	0.459829	0.284615	-0.361538	0.153846	4.13846	0.0243037	0.00241512	14.6769	0.307692	0.230769	0.307692
TCGA-WT-AB41	CVVSARGSQGNLIF	Primary Tumor	TRA	14	0.428571	0.642857	0.0714286	0.0714286	0.0714286	0	0.0714286	0.5	1450.66	8.24969	0.0714286	5.20714	0.578571	0.294286	0.707143	0.0714286	5.20714	1	0.00928193	5.52857	0.357143	0.357143	0.142857
TCGA-WT-AB41	CVVSARGSQGNLIF	Primary Tumor	TRA	14	0.428571	0.642857	0.0714286	0.0714286	0.0714286	0	0.0714286	0.5	1450.66	8.24969	0.0714286	5.20714	0.578571	0.294286	0.707143	0.0714286	5.20714	1	0.00928193	5.52857	0.357143	0.357143	0.142857
TCGA-WT-AB41	CAAGNTGGFKTIF	Primary Tumor	TRA	13	0.615385	0.692308	0.153846	0.0769231	0.0769231	0	0.0769231	0.615385	1286.46	8.22223	0.0769231	4.97692	0.552991	0.275385	0.476923	0.153846	4.97692	0.976728	0.00850263	-12.4308	0.230769	0.307692	0.153846
TCGA-WT-AB41	CAVGGPDSNYQLIW	Primary Tumor	TRA	14	0.357143	0.642857	0.142857	0.0714286	0	0.0714286	0.142857	0.5	1522.68	3.79987	-0.0714286	4.56429	0.507143	0.338571	0.0642857	0.142857	4.56429	0.787711	0.00928193	20.4071	0.357143	0.357143	0.142857
TCGA-WT-AB41	CAVNGGRDDKIIF	Primary Tumor	TRA	13	0.307692	0.615385	0.0769231	0.307692	0.153846	0.153846	0.307692	0.538462	1407.59	5.95343	0	4.54615	0.505128	0.31	0.0461538	0.0769231	4.54615	0.364939	0.00483796	-5.9	0.307692	0.230769	0.0769231
TCGA-AQ-A04J	CALRGGATNKLIF	Primary Tumor	TRA	13	0.461538	0.538462	0.0769231	0.153846	0.153846	0	0.153846	0.538462	1363.63	9.50775	0.153846	5.08462	0.564957	0.293846	0.584615	0.0769231	5.08462	0.0968171	0.00234385	20.6	0.307692	0.230769	0.307692
TCGA-AQ-A04J	CAVGGGDMRF	Primary Tumor	TRA	10	0.5	0.7	0.1	0.2	0.1	0.1	0.2	0.6	1012.16	5.82941	0	4.9	0.544444	0.261	0.4	0.1	4.9	0.509756	0.0122222	17.65	0.2	0.3	0.2
TCGA-AQ-A04J	CALSSPSGGYQKVTF	Primary Tumor	TRA	15	0.533333	0.666667	0.133333	0.0666667	0.0666667	0	0.133333	0.666667	1544.73	8.19745	0.0666667	4.56	0.506667	0.337333	0.06	0.133333	4.56	0.188148	0.0079798	63.78	0.266667	0.4	0.133333
TCGA-AQ-A04J	CALPKSNSNSGYALNF	Primary Tumor	TRA	16	0.4375	0.6875	0.125	0.0625	0.0625	0	0.125	0.5	1685.85	8.19745	0.0625	4.275	0.475	0.319375	-0.225	0.125	4.275	1	0.00860953	21.5125	0.25	0.5	0.25
TCGA-AQ-A04J	CAFQGTYKYIF	Primary Tumor	TRA	11	0.363636	0.363636	0.363636	0.0909091	0.0909091	0	0.0909091	0.454545	1340.54	8.17523	0.0909091	4.8	0.533333	0.308182	0.3	0.363636	4.8	0.830136	0.00846167	1.37273	0.454545	0.0909091	0.0909091
TCGA-AQ-A04J	CAYRSLYSGGGADGLTF	Primary Tumor	TRA	17	0.588235	0.647059	0.176471	0.117647	0.0588235	0.0588235	0.117647	0.647059	1737.89	5.82794	0	4.61765	0.513072	0.243529	0.117647	0.176471	4.61765	0.38567	0.0242628	37.1	0.294118	0.352941	0.235294
TCGA-AQ-A04J	CAVGGSQGNLIF	Primary Tumor	TRA	12	0.5	0.666667	0.0833333	0	0	0	0	0.5	1165.32	5.51813	0	5.38333	0.598148	0.27	0.883333	0.0833333	5.38333	-1	0	21.35	0.333333	0.416667	0.166667
TCGA-AQ-A04J	CAGEGSQGNLIF	Primary Tumor	TRA	12	0.5	0.583333	0.0833333	0.0833333	0	0.0833333	0.0833333	0.583333	1195.3	3.99969	-0.0833333	4.74167	0.526852	0.2725	0.241667	0.0833333	4.74167	0.965909	0.00861111	11.8583	0.25	0.416667	0.25
TCGA-AQ-A04J	CATGKAAGNKLTF	Primary Tumor	TRA	13	0.615385	0.692308	0.0769231	0.153846	0.153846	0	0.153846	0.692308	1281.48	9.31415	0.153846	4.57692	0.508547	0.312308	0.0769231	0.0769231	4.57692	0.0709504	0.00315048	10.8154	0.153846	0.230769	0.307692
TCGA-AQ-A04J	CTGGGNKLTF	Primary Tumor	TRA	10	0.6	0.7	0.1	0.1	0.1	0	0.1	0.6	997.126	8.22223	0.1	4.41	0.49	0.252	-0.09	0.1	4.41	0.653974	0.00777778	76.83	0.2	0.4	0.1
TCGA-EW-A1P3	CAMREVIRSGANSKLTF	Primary Tumor	TRA	17	0.411765	0.529412	0.0588235	0.235294	0.176471	0.0588235	0.235294	0.588235	1883.2	9.50409	0.117647	4.54118	0.504575	0.322353	0.0411765	0.0588235	4.54118	0.139463	0.00985931	28.0941	0.235294	0.235294	0.294118
TCGA-AN-A0XS	CRLSYLPLCSAQDSNYQLIW	Primary Tumor	TRA	20	0.3	0.45	0.15	0.1	0.05	0.05	0.15	0.45	2373.7	5.82123	0	4.525	0.502778	0.335	0.025	0.15	4.525	0.262167	0.0161574	38.39	0.4	0.25	0.25
TCGA-AN-A0XS	CRLSYLPLCSAQDSNYQLIW	Primary Tumor	TRA	20	0.3	0.45	0.15	0.1	0.05	0.05	0.15	0.45	2373.7	5.82123	0	4.525	0.502778	0.335	0.025	0.15	4.525	0.262167	0.0161574	38.39	0.4	0.25	0.25
TCGA-AN-A0XS	CAMREGSSGANNLFF	Primary Tumor	TRA	15	0.466667	0.6	0.133333	0.133333	0.0666667	0.0666667	0.133333	0.533333	1603.78	5.99493	0	4.5	0.5	0.267333	-1.77636e-16	0.133333	4.5	0.999558	0.00320707	11.4867	0.2	0.4	0.333333
TCGA-AN-A0XS	CALSGGTNAGKSTF	Primary Tumor	TRA	14	0.714286	0.785714	0.0714286	0.0714286	0.0714286	0	0.0714286	0.714286	1313.44	8.22223	0.0714286	4.57857	0.50873	0.267143	0.0785714	0.0714286	4.57857	0.945517	0.00826959	4.05	0.142857	0.428571	0.214286
TCGA-AN-A0XS	CAASPGFSGGYNKLIF	Primary Tumor	TRA	16	0.5	0.625	0.1875	0.0625	0.0625	0	0.125	0.5625	1631.85	8.19745	0.0625	4.93125	0.547917	0.306875	0.43125	0.1875	4.93125	0.323482	0.00766888	48.7375	0.3125	0.4375	0.1875
TCGA-AN-A0XS	CALGNAGGTSYGKLTF	Primary Tumor	TRA	16	0.625	0.6875	0.125	0.0625	0.0625	0	0.0625	0.625	1559.74	8.19745	0.0625	4.75	0.527778	0.2575	0.25	0.125	4.75	0.90155	0.00766888	-1.73125	0.25	0.375	0.25
TCGA-AN-A0XS	CRLHLCCQGNYGGSQGNLIF	Primary Tumor	TRA	20	0.4	0.5	0.15	0.05	0.05	0	0.05	0.45	2183.49	7.96783	0.05	4.54	0.504444	0.261	0.04	0.1	4.54	0.649486	0.00449074	8.795	0.3	0.35	0.15
TCGA-AO-A0J2	CNERLTGGSNYKLTF	Primary Tumor	TRA	15	0.4	0.533333	0.133333	0.2	0.133333	0.0666667	0.2	0.533333	1702.89	8.19757	0.0666667	3.81333	0.423704	0.279333	-0.686667	0.133333	3.81333	0.39112	0.0126571	14.4667	0.266667	0.333333	0.2
TCGA-AO-A0J2	CALSDQGAQKLVF	Primary Tumor	TRA	13	0.384615	0.538462	0.0769231	0.153846	0.0769231	0.0769231	0.153846	0.615385	1379.58	5.82867	0	4.89231	0.54359	0.332308	0.392308	0.0769231	4.89231	0.0709504	0.0321528	-3.83077	0.307692	0.153846	0.307692
TCGA-AO-A0J2	CALKGGSYIPTF	Primary Tumor	TRA	12	0.5	0.583333	0.166667	0.0833333	0.0833333	0	0.166667	0.583333	1256.47	8.19745	0.0833333	5.025	0.558333	0.3375	0.525	0.166667	5.025	0.0916276	0.00861111	13.1833	0.333333	0.333333	0.166667
TCGA-AO-A0J2	CALKGGSYIPTF	Primary Tumor	TRA	12	0.5	0.583333	0.166667	0.0833333	0.0833333	0	0.166667	0.583333	1256.47	8.19745	0.0833333	5.025	0.558333	0.3375	0.525	0.166667	5.025	0.0916276	0.00861111	13.1833	0.333333	0.333333	0.166667
TCGA-AO-A0J2	CALKGGSYIPTF	Primary Tumor	TRA	12	0.5	0.583333	0.166667	0.0833333	0.0833333	0	0.166667	0.583333	1256.47	8.19745	0.0833333	5.025	0.558333	0.3375	0.525	0.166667	5.025	0.0916276	0.00861111	13.1833	0.333333	0.333333	0.166667
TCGA-E9-A22D	CCCLLLCCGGSKVDSNYQLIW	Primary Tumor	TRA	21	0.428571	0.571429	0.0952381	0.0952381	0.047619	0.047619	0.0952381	0.333333	2321.78	5.80219	0	5.32857	0.592063	0.280476	0.828571	0.0952381	5.32857	0.872698	0.0081781	22.5429	0.380952	0.238095	0.190476
TCGA-E9-A22D	CCCLLLCGGGPKGDSNYQLIW	Primary Tumor	TRA	21	0.428571	0.571429	0.0952381	0.0952381	0.047619	0.047619	0.142857	0.428571	2243.65	5.80829	0	4.93333	0.548148	0.298571	0.433333	0.0952381	4.93333	0.851463	0.0081781	35.5762	0.333333	0.333333	0.190476
TCGA-E9-A22D	CGASRDTGFQKLVF	Primary Tumor	TRA	14	0.428571	0.571429	0.142857	0.214286	0.142857	0.0714286	0.214286	0.642857	1528.73	8.22211	0.0714286	4.51429	0.501587	0.298571	0.0142857	0.142857	4.51429	0.10548	0.0130166	-5.88571	0.285714	0.214286	0.142857
TCGA-E9-A22D	CVVSERGGSYIPTF	Primary Tumor	TRA	14	0.428571	0.642857	0.142857	0.142857	0.0714286	0.0714286	0.214286	0.571429	1514.7	5.9942	0	4.8	0.533333	0.335714	0.3	0.142857	4.8	0.169046	0.00554321	27.1643	0.357143	0.357143	0.0714286
TCGA-E9-A22D	CALQVDSWGKLQF	Primary Tumor	TRA	13	0.307692	0.461538	0.153846	0.153846	0.0769231	0.0769231	0.153846	0.538462	1494.71	5.82867	0	4.68462	0.520513	0.323077	0.184615	0.153846	4.68462	0.214446	0.0259722	30	0.384615	0.153846	0.230769
TCGA-E9-A22D	CALQVDSWGKLQF	Primary Tumor	TRA	13	0.307692	0.461538	0.153846	0.153846	0.0769231	0.0769231	0.153846	0.538462	1494.71	5.82867	0	4.68462	0.520513	0.323077	0.184615	0.153846	4.68462	0.214446	0.0259722	30	0.384615	0.153846	0.230769
TCGA-E9-A22D	CALQVDSWGKLQF	Primary Tumor	TRA	13	0.307692	0.461538	0.153846	0.153846	0.0769231	0.0769231	0.153846	0.538462	1494.71	5.82867	0	4.68462	0.520513	0.323077	0.184615	0.153846	4.68462	0.214446	0.0259722	30	0.384615	0.153846	0.230769
TCGA-E9-A22D	CITVLWGGSNYKLTF	Primary Tumor	TRA	15	0.4	0.533333	0.2	0.0666667	0.0666667	0	0.0666667	0.4	1701.98	8.19745	0.0666667	5.1	0.566667	0.276667	0.6	0.2	5.1	0.920366	0.0079798	29	0.466667	0.266667	0.133333
TCGA-E9-A22D	CITVLWGGSNYKLTF	Primary Tumor	TRA	15	0.4	0.533333	0.2	0.0666667	0.0666667	0	0.0666667	0.4	1701.98	8.19745	0.0666667	5.1	0.566667	0.276667	0.6	0.2	5.1	0.920366	0.0079798	29	0.466667	0.266667	0.133333
TCGA-E9-A22D	CATDENTDKLIF	Primary Tumor	TRA	12	0.333333	0.583333	0.0833333	0.333333	0.0833333	0.25	0.333333	0.583333	1369.5	4.02802	-0.166667	4.175	0.463889	0.325833	-0.325	0.0833333	4.175	0.0111762	0.0596781	-12.0583	0.25	0.0833333	0.25
TCGA-E9-A22D	CLLLLRCGRGRQINLW	Primary Tumor	TRA	16	0.25	0.3125	0.0625	0.1875	0.1875	0	0.1875	0.375	1914.35	10.4128	0.1875	4.89375	0.54375	0.28375	0.39375	0.0625	4.89375	0.278139	0.0217408	54.9813	0.4375	0.1875	0.3125
TCGA-E9-A22D	CVVSGYRGSTLGRLYF	Primary Tumor	TRA	16	0.4375	0.5625	0.1875	0.125	0.125	0	0.125	0.5	1778.04	9.31073	0.125	4.8875	0.543056	0.258125	0.3875	0.1875	4.8875	0.281667	0.00556187	-16.5188	0.4375	0.3125	0.125
TCGA-E9-A22D	CVVSGYRGSTLGRLYF	Primary Tumor	TRA	16	0.4375	0.5625	0.1875	0.125	0.125	0	0.125	0.5	1778.04	9.31073	0.125	4.8875	0.543056	0.258125	0.3875	0.1875	4.8875	0.281667	0.00556187	-16.5188	0.4375	0.3125	0.125
TCGA-E9-A22D	CAVNTGGFKTIF	Primary Tumor	TRA	12	0.5	0.666667	0.166667	0.0833333	0.0833333	0	0.0833333	0.5	1257.46	8.22223	0.0833333	5.25	0.583333	0.289167	0.75	0.166667	5.25	0.965909	0.00861111	-7.225	0.333333	0.25	0.0833333
TCGA-E9-A22D	CAVNTGGFKTIF	Primary Tumor	TRA	12	0.5	0.666667	0.166667	0.0833333	0.0833333	0	0.0833333	0.5	1257.46	8.22223	0.0833333	5.25	0.583333	0.289167	0.75	0.166667	5.25	0.965909	0.00861111	-7.225	0.333333	0.25	0.0833333
TCGA-AN-A0AR	CCEGHNAGNMLTF	Primary Tumor	TRA	13	0.461538	0.615385	0.153846	0.0769231	0	0.0769231	0.0769231	0.461538	1396.57	5.23969	-0.0769231	4.50769	0.500855	0.26	0.00769231	0.0769231	4.50769	0.953456	0.00785626	30.4077	0.153846	0.307692	0.307692
TCGA-OL-A5RU	CAVRDPISSGSARQLTF	Primary Tumor	TRA	17	0.470588	0.647059	0.0588235	0.176471	0.117647	0.0588235	0.235294	0.705882	1808.02	8.24957	0.0588235	4.51765	0.501961	0.349412	0.0176471	0.0588235	4.51765	0.261273	0.0131157	39.3294	0.235294	0.294118	0.176471
TCGA-OL-A5RU	CAEEHGSGNTGKLIF	Primary Tumor	TRA	15	0.466667	0.533333	0.133333	0.2	0.0666667	0.133333	0.2	0.666667	1562.7	5.39911	-0.0666667	4.17333	0.463704	0.282667	-0.326667	0.0666667	4.17333	0.39112	0.0464955	-9.17333	0.2	0.333333	0.266667
TCGA-OL-A5RU	CAVSDGGNFNKFYF	Primary Tumor	TRA	14	0.357143	0.642857	0.285714	0.142857	0.0714286	0.0714286	0.142857	0.428571	1568.71	5.82794	0	4.47143	0.496825	0.262143	-0.0285714	0.285714	4.47143	0.115471	0.0318889	41.5007	0.357143	0.357143	0.0714286
TCGA-AN-A0XT	CAVRDETAGAAGNKLTF	Primary Tumor	TRA	17	0.529412	0.705882	0.0588235	0.235294	0.117647	0.117647	0.235294	0.705882	1723.9	6.06256	0	4.46471	0.496078	0.315294	-0.0352941	0.0588235	4.46471	0.371641	0.02529	15.6176	0.176471	0.176471	0.352941
TCGA-AN-A0XT	CAASMGRNYQLIW	Primary Tumor	TRA	13	0.384615	0.461538	0.153846	0.0769231	0.0769231	0	0.0769231	0.461538	1512.75	8.22198	0.0769231	4.60769	0.511966	0.31	0.107692	0.153846	4.60769	0.995249	0.00928254	18.7231	0.307692	0.230769	0.307692
TCGA-C8-A137	CVVPRTGNNRKLIW	Primary Tumor	TRA	14	0.214286	0.571429	0.0714286	0.214286	0.214286	0	0.285714	0.428571	1655.96	10.8604	0.214286	4.19286	0.465873	0.372857	-0.307143	0.0714286	4.19286	0.0353111	0.0113998	-5.92143	0.357143	0.285714	0.0714286
TCGA-C8-A137	CAVGDNFNKFYF	Primary Tumor	TRA	12	0.25	0.583333	0.333333	0.166667	0.0833333	0.0833333	0.166667	0.333333	1424.58	5.82794	0	4.56667	0.507407	0.275	0.0666667	0.333333	4.56667	0.119457	0.0274206	36.4675	0.416667	0.25	0.0833333
TCGA-B6-A2IU	CALKSSGDKLTF	Primary Tumor	TRA	12	0.5	0.583333	0.0833333	0.25	0.166667	0.0833333	0.25	0.666667	1269.47	8.19757	0.0833333	4.55833	0.506481	0.301667	0.0583333	0.0833333	4.55833	0.0894573	0.00883377	14.275	0.25	0.25	0.25
TCGA-D8-A13Z	CLVARNRDDKIIF	Primary Tumor	TRA	13	0.153846	0.461538	0.0769231	0.384615	0.230769	0.153846	0.384615	0.461538	1562.83	8.22198	0.0769231	4.55385	0.505983	0.337692	0.0538462	0.0769231	4.55385	0.103962	0.0203649	20.4769	0.384615	0.0769231	0.153846
TCGA-D8-A13Z	CAVSGGYQKVTF	Primary Tumor	TRA	12	0.5	0.666667	0.166667	0.0833333	0.0833333	0	0.0833333	0.583333	1259.43	8.19745	0.0833333	4.875	0.541667	0.310833	0.375	0.166667	4.875	0.965909	0.00861111	8.50833	0.333333	0.25	0.0833333
TCGA-D8-A13Z	CSYMDSNYQLIW	Primary Tumor	TRA	12	0.25	0.416667	0.25	0.0833333	0	0.0833333	0.0833333	0.333333	1522.7	3.79987	-0.0833333	4.25833	0.473148	0.2975	-0.241667	0.25	4.25833	0.954546	0.00902778	61.8333	0.416667	0.25	0.166667
TCGA-D8-A13Z	CAASINRGSTLGRLYF	Primary Tumor	TRA	16	0.5	0.5625	0.125	0.125	0.125	0	0.125	0.5625	1728.97	9.50409	0.125	4.75625	0.528472	0.273125	0.25625	0.125	4.75625	0.281667	0.00556187	4.06875	0.3125	0.3125	0.25
TCGA-D8-A13Z	CAGPEGGSQGNLIF	Primary Tumor	TRA	14	0.5	0.642857	0.0714286	0.0714286	0	0.0714286	0.142857	0.642857	1349.47	3.99969	-0.0714286	4.56429	0.507143	0.314286	0.0642857	0.0714286	4.56429	0.922771	0.00906148	38.2071	0.214286	0.5	0.214286
TCGA-D8-A13Z	CAGPEGGSQGNLIF	Primary Tumor	TRA	14	0.5	0.642857	0.0714286	0.0714286	0	0.0714286	0.142857	0.642857	1349.47	3.99969	-0.0714286	4.56429	0.507143	0.314286	0.0642857	0.0714286	4.56429	0.922771	0.00906148	38.2071	0.214286	0.5	0.214286
TCGA-D8-A13Z	CAVGVPNSGYALNF	Primary Tumor	TRA	14	0.428571	0.785714	0.142857	0	0	0	0.0714286	0.428571	1411.58	5.5174	0	5.18571	0.57619	0.319286	0.685714	0.142857	5.18571	1	0	17.0929	0.357143	0.428571	0.214286
TCGA-D8-A13Z	CAVSGGNQFYF	Primary Tumor	TRA	11	0.454545	0.636364	0.272727	0	0	0	0	0.454545	1192.3	5.5174	0	4.88182	0.542424	0.263636	0.381818	0.272727	4.88182	-1	0	28.5191	0.363636	0.363636	0.0909091
TCGA-D8-A13Z	CAPTTSGTYKYIF	Primary Tumor	TRA	13	0.538462	0.615385	0.230769	0.0769231	0.0769231	0	0.153846	0.615385	1451.64	8.17523	0.0769231	4.51538	0.501709	0.351538	0.0153846	0.230769	4.51538	0.233903	0.00850263	17.5154	0.307692	0.230769	0.0769231
TCGA-D8-A13Z	CSYMDSNYQLIW	Primary Tumor	TRA	12	0.25	0.416667	0.25	0.0833333	0	0.0833333	0.0833333	0.333333	1522.7	3.79987	-0.0833333	4.25833	0.473148	0.2975	-0.241667	0.25	4.25833	0.954546	0.00902778	61.8333	0.416667	0.25	0.166667
TCGA-D8-A13Z	CDKIIF	Primary Tumor	TRA	6	0.166667	0.333333	0.166667	0.333333	0.166667	0.166667	0.333333	0.333333	737.907	5.82867	0	5.65	0.627778	0.343333	1.15	0.166667	5.65	0.150943	0	12.1333	0.5	0	0
TCGA-D8-A13Z	CALYSSASKIIF	Primary Tumor	TRA	12	0.5	0.5	0.166667	0.0833333	0.0833333	0	0.0833333	0.5	1302.54	8.19745	0.0833333	5.675	0.630556	0.309167	1.175	0.166667	5.675	0.965909	0.00861111	18.1417	0.416667	0.25	0.25
TCGA-D8-A13Z	CALYSSASKIIF	Primary Tumor	TRA	12	0.5	0.5	0.166667	0.0833333	0.0833333	0	0.0833333	0.5	1302.54	8.19745	0.0833333	5.675	0.630556	0.309167	1.175	0.166667	5.675	0.965909	0.00861111	18.1417	0.416667	0.25	0.25
TCGA-BH-A18G	CAASGEAAGNKLTF	Primary Tumor	TRA	14	0.642857	0.714286	0.0714286	0.142857	0.0714286	0.0714286	0.142857	0.714286	1339.47	5.99432	0	4.72143	0.524603	0.300714	0.221429	0.0714286	4.72143	0.156361	0.0303457	17.5	0.142857	0.285714	0.428571
TCGA-JL-A3YX	CAIRRFQKLVF	Primary Tumor	TRA	11	0.181818	0.272727	0.181818	0.272727	0.272727	0	0.272727	0.454545	1380.7	10.8604	0.272727	5.04545	0.560606	0.348182	0.545455	0.181818	5.04545	0.0778188	0.0234987	53.4455	0.454545	0	0.181818
TCGA-A8-A06P	CDTNNDMRF	Primary Tumor	TRA	9	0.222222	0.666667	0.111111	0.333333	0.111111	0.222222	0.333333	0.444444	1115.2	4.20782	-0.111111	3.16667	0.351852	0.291111	-1.33333	0.111111	3.16667	0.0497665	0.0410508	-11.4889	0.111111	0.222222	0.111111
TCGA-D8-A1JF	CALGDTSGTYKYIF	Primary Tumor	TRA	14	0.5	0.571429	0.214286	0.142857	0.0714286	0.0714286	0.142857	0.571429	1538.72	5.82733	0	4.67143	0.519048	0.28	0.171429	0.214286	4.67143	0.115471	0.0318889	-7.51429	0.357143	0.214286	0.142857
TCGA-D8-A1JF	CRGSGNTGKLIF	Primary Tumor	TRA	12	0.5	0.583333	0.0833333	0.166667	0.166667	0	0.166667	0.583333	1252.44	9.50775	0.166667	4.41667	0.490741	0.2675	-0.0833333	0.0833333	4.41667	0.258816	0.00587302	-33.2833	0.25	0.416667	0.0833333
TCGA-E9-A3QA	CAVRASSSNTGKLIF	Primary Tumor	TRA	15	0.533333	0.666667	0.0666667	0.133333	0.133333	0	0.133333	0.6	1553.78	9.50775	0.133333	4.9	0.544444	0.304	0.4	0.0666667	4.9	0.335604	0.00626263	12.3733	0.266667	0.333333	0.2
TCGA-E9-A3QA	CAVRASSSNTGKLIF	Primary Tumor	TRA	15	0.533333	0.666667	0.0666667	0.133333	0.133333	0	0.133333	0.6	1553.78	9.50775	0.133333	4.9	0.544444	0.304	0.4	0.0666667	4.9	0.335604	0.00626263	12.3733	0.266667	0.333333	0.2
TCGA-E9-A3QA	CAVGAPGGGADGLTF	Primary Tumor	TRA	15	0.666667	0.866667	0.0666667	0.0666667	0	0.0666667	0.133333	0.733333	1292.42	3.79987	-0.0666667	5.22667	0.580741	0.295333	0.726667	0.0666667	5.22667	0.190157	0.00886364	24.2133	0.2	0.4	0.266667
TCGA-E9-A3QA	CAMKEGKAAGNKLTF	Primary Tumor	TRA	15	0.466667	0.533333	0.0666667	0.266667	0.2	0.0666667	0.266667	0.666667	1568.86	9.1972	0.133333	4.24667	0.471852	0.338667	-0.253333	0.0666667	4.24667	0.0817291	0.0114731	16.3667	0.133333	0.2	0.4
TCGA-E9-A3QA	CAMKEGKAAGNKLTF	Primary Tumor	TRA	15	0.466667	0.533333	0.0666667	0.266667	0.2	0.0666667	0.266667	0.666667	1568.86	9.1972	0.133333	4.24667	0.471852	0.338667	-0.253333	0.0666667	4.24667	0.0817291	0.0114731	16.3667	0.133333	0.2	0.4
TCGA-E9-A3QA	CIVRVPNQAGTALIF	Primary Tumor	TRA	15	0.333333	0.6	0.0666667	0.0666667	0.0666667	0	0.133333	0.466667	1601.91	8.24969	0.0666667	5.56	0.617778	0.372667	1.06	0.0666667	5.56	0.854258	0.0079798	5.82667	0.4	0.2	0.2
TCGA-E9-A3QA	CALGGLGGGADGLTF	Primary Tumor	TRA	15	0.666667	0.733333	0.0666667	0.0666667	0	0.0666667	0.0666667	0.666667	1308.46	3.79987	-0.0666667	5.41333	0.601481	0.218667	0.913333	0.0666667	5.41333	0.982605	0.00886364	30.92	0.266667	0.4	0.333333
TCGA-E9-A3QA	CALGGLGGGADGLTF	Primary Tumor	TRA	15	0.666667	0.733333	0.0666667	0.0666667	0	0.0666667	0.0666667	0.666667	1308.46	3.79987	-0.0666667	5.41333	0.601481	0.218667	0.913333	0.0666667	5.41333	0.982605	0.00886364	30.92	0.266667	0.4	0.333333
TCGA-E9-A3QA	CALGGLGGGADGLTF	Primary Tumor	TRA	15	0.666667	0.733333	0.0666667	0.0666667	0	0.0666667	0.0666667	0.666667	1308.46	3.79987	-0.0666667	5.41333	0.601481	0.218667	0.913333	0.0666667	5.41333	0.982605	0.00886364	30.92	0.266667	0.4	0.333333
TCGA-E9-A3QA	CCVLLHRQITPYTGTASKLTF	Primary Tumor	TRA	21	0.428571	0.52381	0.142857	0.0952381	0.0952381	0	0.142857	0.571429	2352.77	8.90399	0.0952381	4.86667	0.540741	0.338571	0.366667	0.0952381	4.86667	0.310007	0.00833442	4.80952	0.333333	0.142857	0.190476
TCGA-B6-A0WX	CALHPGGATNKLIF	Primary Tumor	TRA	14	0.428571	0.571429	0.142857	0.0714286	0.0714286	0	0.142857	0.571429	1441.7	8.23114	0.0714286	5.02143	0.557937	0.331429	0.521429	0.0714286	5.02143	0.115471	0.00826959	10.0929	0.285714	0.285714	0.285714
TCGA-B6-A0WX	CALHPGGATNKLIF	Primary Tumor	TRA	14	0.428571	0.571429	0.142857	0.0714286	0.0714286	0	0.142857	0.571429	1441.7	8.23114	0.0714286	5.02143	0.557937	0.331429	0.521429	0.0714286	5.02143	0.115471	0.00826959	10.0929	0.285714	0.285714	0.285714
TCGA-B6-A0WX	CALSGTGANNLFF	Primary Tumor	TRA	13	0.538462	0.692308	0.153846	0	0	0	0	0.461538	1314.47	5.51813	0	5.26923	0.58547	0.243846	0.769231	0.153846	5.26923	-1	0	-10.3615	0.307692	0.384615	0.307692
TCGA-B6-A0WX	CALVYSGGGADGLPF	Primary Tumor	TRA	15	0.533333	0.733333	0.133333	0.0666667	0	0.0666667	0.133333	0.6	1426.59	3.79987	-0.0666667	5.29333	0.588148	0.289333	0.793333	0.133333	5.29333	0.809983	0.00886364	35.12	0.333333	0.4	0.266667
TCGA-B6-A0WX	CAFMIFSGGGADGLTF	Primary Tumor	TRA	16	0.5625	0.625	0.1875	0.0625	0	0.0625	0.0625	0.5625	1593.82	3.79987	-0.0625	5.63125	0.625694	0.241875	1.13125	0.1875	5.63125	0.97589	0.00860953	21.9	0.3125	0.3125	0.25
TCGA-E9-A1R2	CAMRTTGYSNLTF	Primary Tumor	TRA	13	0.538462	0.615385	0.153846	0.0769231	0.0769231	0	0.0769231	0.538462	1464.67	8.22198	0.0769231	4.51538	0.501709	0.278462	0.0153846	0.153846	4.51538	0.976728	0.00850263	-0.138462	0.230769	0.230769	0.230769
TCGA-E9-A1R2	CAVGSPNDYKLSF	Primary Tumor	TRA	13	0.384615	0.692308	0.153846	0.153846	0.0769231	0.0769231	0.230769	0.538462	1400.56	5.82794	0	4.44615	0.494017	0.339231	-0.0538462	0.153846	4.44615	0.198105	0.0101389	29.9692	0.307692	0.384615	0.153846
TCGA-EW-A1P4	CAVRVFSSSGGYQKVTF	Primary Tumor	TRA	17	0.470588	0.647059	0.176471	0.117647	0.117647	0	0.117647	0.588235	1836.08	9.31244	0.117647	4.81765	0.535294	0.302941	0.317647	0.176471	4.81765	0.444096	0.00785625	31.6059	0.352941	0.294118	0.0588235
TCGA-EW-A1P4	CAVRVFSSSGGYQKVTF	Primary Tumor	TRA	17	0.470588	0.647059	0.176471	0.117647	0.117647	0	0.117647	0.588235	1836.08	9.31244	0.117647	4.81765	0.535294	0.302941	0.317647	0.176471	4.81765	0.444096	0.00785625	31.6059	0.352941	0.294118	0.0588235
TCGA-EW-A1P4	CAVGRDDKIIF	Primary Tumor	TRA	11	0.272727	0.545455	0.0909091	0.363636	0.181818	0.181818	0.363636	0.545455	1236.44	5.95343	0	4.90909	0.545455	0.33	0.409091	0.0909091	4.90909	0.0547818	0.00400647	-14.0636	0.363636	0.0909091	0.0909091
TCGA-EW-A1P4	CAVGRDDKIIF	Primary Tumor	TRA	11	0.272727	0.545455	0.0909091	0.363636	0.181818	0.181818	0.363636	0.545455	1236.44	5.95343	0	4.90909	0.545455	0.33	0.409091	0.0909091	4.90909	0.0547818	0.00400647	-14.0636	0.363636	0.0909091	0.0909091
TCGA-EW-A1P4	CAVGRDDKIIF	Primary Tumor	TRA	11	0.272727	0.545455	0.0909091	0.363636	0.181818	0.181818	0.363636	0.545455	1236.44	5.95343	0	4.90909	0.545455	0.33	0.409091	0.0909091	4.90909	0.0547818	0.00400647	-14.0636	0.363636	0.0909091	0.0909091
TCGA-EW-A1P4	CAVGRDDKIIF	Primary Tumor	TRA	11	0.272727	0.545455	0.0909091	0.363636	0.181818	0.181818	0.363636	0.545455	1236.44	5.95343	0	4.90909	0.545455	0.33	0.409091	0.0909091	4.90909	0.0547818	0.00400647	-14.0636	0.363636	0.0909091	0.0909091
TCGA-EW-A1P4	CAVNAPTGSASKIIF	Primary Tumor	TRA	15	0.533333	0.733333	0.0666667	0.0666667	0.0666667	0	0.133333	0.6	1478.71	8.22223	0.0666667	5.31333	0.59037	0.364	0.813333	0.0666667	5.31333	0.188148	0.0079798	10.8533	0.266667	0.333333	0.2
TCGA-EW-A1P4	CAVNAPTGSASKIIF	Primary Tumor	TRA	15	0.533333	0.733333	0.0666667	0.0666667	0.0666667	0	0.133333	0.6	1478.71	8.22223	0.0666667	5.31333	0.59037	0.364	0.813333	0.0666667	5.31333	0.188148	0.0079798	10.8533	0.266667	0.333333	0.2
TCGA-EW-A1P4	CAVRDLRNSGNTPLVF	Primary Tumor	TRA	16	0.3125	0.6875	0.0625	0.1875	0.125	0.0625	0.25	0.5	1762	8.24957	0.0625	4.50625	0.500694	0.33375	0.00625	0.0625	4.50625	0.148985	0.00521096	18.5125	0.3125	0.3125	0.1875
TCGA-EW-A1P4	CAVRDLRNSGNTPLVF	Primary Tumor	TRA	16	0.3125	0.6875	0.0625	0.1875	0.125	0.0625	0.25	0.5	1762	8.24957	0.0625	4.50625	0.500694	0.33375	0.00625	0.0625	4.50625	0.148985	0.00521096	18.5125	0.3125	0.3125	0.1875
TCGA-EW-A1P4	CAVRDLRNSGNTPLVF	Primary Tumor	TRA	16	0.3125	0.6875	0.0625	0.1875	0.125	0.0625	0.25	0.5	1762	8.24957	0.0625	4.50625	0.500694	0.33375	0.00625	0.0625	4.50625	0.148985	0.00521096	18.5125	0.3125	0.3125	0.1875
TCGA-C8-A1HG	CAVGAGRDDKIIF	Primary Tumor	TRA	13	0.384615	0.615385	0.0769231	0.307692	0.153846	0.153846	0.307692	0.615385	1364.57	5.95343	0	4.95385	0.550427	0.317692	0.453846	0.0769231	4.95385	0.364939	0.00483796	-16.8923	0.307692	0.153846	0.153846
TCGA-C8-A1HG	CAPVGSSNTGKLIF	Primary Tumor	TRA	14	0.5	0.714286	0.0714286	0.0714286	0.0714286	0	0.142857	0.571429	1393.61	8.22223	0.0714286	5.03571	0.559524	0.335714	0.535714	0.0714286	5.03571	0.343039	0.00826959	20.2357	0.285714	0.428571	0.142857
TCGA-C8-A1HG	CALSEGDNYGQNFVF	Primary Tumor	TRA	15	0.333333	0.6	0.2	0.133333	0	0.133333	0.133333	0.466667	1663.76	3.66595	-0.133333	4.33333	0.481481	0.275333	-0.166667	0.2	4.33333	0.759323	0.0245707	6.49333	0.333333	0.333333	0.2
TCGA-C8-A1HG	CSEGASQGGSNYKLTF	Primary Tumor	TRA	16	0.5625	0.625	0.125	0.125	0.0625	0.0625	0.125	0.6875	1648.75	5.99359	0	3.93125	0.436806	0.280625	-0.56875	0.125	3.93125	0.472078	0.0205051	38.2625	0.1875	0.4375	0.1875
TCGA-C8-A1HG	CAARDTDKLIF	Primary Tumor	TRA	11	0.363636	0.545455	0.0909091	0.363636	0.181818	0.181818	0.363636	0.636364	1252.44	5.95343	0	4.6	0.511111	0.331818	0.1	0.0909091	4.6	0.0219959	0.00114932	-20.0091	0.272727	0	0.272727
TCGA-C8-A1HG	CSVLLCSNPNAGNMLTF	Primary Tumor	TRA	17	0.411765	0.705882	0.0588235	0	0	0	0.0588235	0.352941	1784.09	5.51141	0	5.22353	0.580392	0.308824	0.723529	0.0588235	5.22353	1	0	9.98235	0.294118	0.411765	0.294118
TCGA-C8-A1HG	CALRRGSQGNLIF	Primary Tumor	TRA	13	0.384615	0.461538	0.0769231	0.153846	0.153846	0	0.153846	0.538462	1434.67	10.3519	0.153846	4.62308	0.513675	0.286154	0.123077	0.0769231	4.62308	0.830755	0.0313449	69.8615	0.307692	0.307692	0.230769
TCGA-C8-A1HG	CAVRDVNAGNNRKLIW	Primary Tumor	TRA	16	0.25	0.625	0.0625	0.25	0.1875	0.0625	0.25	0.4375	1829.09	9.50409	0.125	4.1625	0.4625	0.325625	-0.3375	0.0625	4.1625	0.261219	0.0367472	-1.2375	0.3125	0.25	0.1875
TCGA-C8-A1HG	CAWPYNTDKLIF	Primary Tumor	TRA	12	0.25	0.5	0.25	0.166667	0.0833333	0.0833333	0.25	0.416667	1470.69	5.82794	0	4.5	0.5	0.364167	0	0.25	4.5	0.0894573	0.00448413	-12.0583	0.416667	0.166667	0.166667
TCGA-C8-A1HG	CAARDTDKLIF	Primary Tumor	TRA	11	0.363636	0.545455	0.0909091	0.363636	0.181818	0.181818	0.363636	0.636364	1252.44	5.95343	0	4.6	0.511111	0.331818	0.1	0.0909091	4.6	0.0219959	0.00114932	-20.0091	0.272727	0	0.272727
TCGA-C8-A1HG	CAGRNNNARLMF	Primary Tumor	TRA	12	0.333333	0.583333	0.0833333	0.166667	0.166667	0	0.166667	0.416667	1366.57	10.3519	0.166667	4.05833	0.450926	0.288333	-0.441667	0.0833333	4.05833	0.0470281	0.00253968	19.45	0.166667	0.333333	0.333333
TCGA-C8-A1HG	CDRLRFVLLCCETPNNARLMF	Primary Tumor	TRA	21	0.238095	0.47619	0.0952381	0.238095	0.142857	0.0952381	0.285714	0.380952	2515.01	7.9671	0.047619	4.80476	0.533862	0.328095	0.304762	0.0952381	4.80476	0.177852	0.0290947	24.2762	0.333333	0.142857	0.333333
TCGA-C8-A1HG	CAFMKGRDDKIIF	Primary Tumor	TRA	13	0.230769	0.384615	0.153846	0.384615	0.230769	0.153846	0.384615	0.538462	1543.85	8.19745	0.0769231	4.58462	0.509402	0.333077	0.0846154	0.153846	4.58462	0.103962	0.0203649	-10.3615	0.307692	0.0769231	0.153846
TCGA-C8-A1HG	CNETPISSGSARQLTF	Primary Tumor	TRA	16	0.5	0.625	0.0625	0.125	0.0625	0.0625	0.1875	0.6875	1710.86	5.99493	0	4.1625	0.4625	0.344375	-0.3375	0.0625	4.1625	0.254212	0.0234343	41.1625	0.1875	0.375	0.1875
TCGA-A2-A0D4	CAGMDSSYKLIF	Primary Tumor	TRA	12	0.416667	0.5	0.166667	0.166667	0.0833333	0.0833333	0.166667	0.5	1334.56	5.82794	0	5.05	0.561111	0.291667	0.55	0.166667	5.05	0.119457	0.0274206	34.1917	0.333333	0.25	0.25
TCGA-AC-A2BM	CLVGDMRGSSNTGKLIF	Primary Tumor	TRA	17	0.411765	0.588235	0.0588235	0.176471	0.117647	0.0588235	0.176471	0.529412	1798.09	8.22211	0.0588235	4.77059	0.530065	0.278824	0.270588	0.0588235	4.77059	0.263823	0.0164744	-2.32941	0.294118	0.352941	0.176471
TCGA-AC-A2BM	CAVHNAGGTSYGKLTF	Primary Tumor	TRA	16	0.5625	0.6875	0.1875	0.0625	0.0625	0	0.0625	0.625	1625.8	8.20636	0.0625	4.6	0.511111	0.27125	0.1	0.125	4.6	0.90155	0.00766888	18.375	0.25	0.3125	0.1875
TCGA-AC-A2BM	CAVSGGSYIPTF	Primary Tumor	TRA	12	0.583333	0.75	0.166667	0	0	0	0.0833333	0.583333	1201.35	5.5174	0	5.31667	0.590741	0.323333	0.816667	0.166667	5.31667	0.977273	0	27.3333	0.333333	0.416667	0.0833333
TCGA-E2-A15O	CAAGNNRKLIW	Primary Tumor	TRA	11	0.363636	0.545455	0.0909091	0.181818	0.181818	0	0.181818	0.454545	1245.45	9.50775	0.181818	4.29091	0.476768	0.316364	-0.209091	0.0909091	4.29091	0.562986	0.0287733	-6.34545	0.272727	0.272727	0.272727
TCGA-E2-A15O	CALRHAGNNSKLIW	Primary Tumor	TRA	14	0.357143	0.5	0.142857	0.142857	0.142857	0	0.142857	0.5	1582.83	9.50812	0.142857	4.32143	0.480159	0.297143	-0.178571	0.0714286	4.32143	0.229255	0.00473268	24.6714	0.285714	0.285714	0.285714
TCGA-E2-A15O	CALTRNSGNTPLVF	Primary Tumor	TRA	14	0.428571	0.714286	0.0714286	0.0714286	0.0714286	0	0.142857	0.5	1492.7	8.24969	0.0714286	4.72857	0.525397	0.327857	0.228571	0.0714286	4.72857	0.115471	0.00906148	5.97143	0.285714	0.357143	0.214286
TCGA-E2-A15O	CALSTSGTYKYIF	Primary Tumor	TRA	13	0.538462	0.538462	0.230769	0.0769231	0.0769231	0	0.0769231	0.538462	1453.66	8.17523	0.0769231	4.92308	0.547009	0.286923	0.423077	0.230769	4.92308	0.976728	0.00850263	2.7	0.384615	0.230769	0.153846
TCGA-E2-A15O	CAYRSAANDMRF	Primary Tumor	TRA	12	0.416667	0.583333	0.166667	0.25	0.166667	0.0833333	0.25	0.583333	1404.57	8.22186	0.0833333	4.04167	0.449074	0.309167	-0.458333	0.166667	4.04167	0.0711232	0.0168959	25.4083	0.166667	0.166667	0.333333
TCGA-E2-A15O	CVVITSGTYKYIF	Primary Tumor	TRA	13	0.384615	0.538462	0.230769	0.0769231	0.0769231	0	0.0769231	0.384615	1493.76	8.17523	0.0769231	5.54615	0.616239	0.311538	1.04615	0.230769	5.54615	0.976728	0.00850263	-3.1	0.538462	0.153846	0
TCGA-E2-A15O	CAENNAGNMLTF	Primary Tumor	TRA	12	0.416667	0.666667	0.0833333	0.0833333	0	0.0833333	0.0833333	0.416667	1284.42	3.99969	-0.0833333	4.45833	0.49537	0.286667	-0.0416667	0.0833333	4.45833	0.977273	0.00819444	12.375	0.166667	0.333333	0.416667
TCGA-E2-A15O	CAENNAGNMLTF	Primary Tumor	TRA	12	0.416667	0.666667	0.0833333	0.0833333	0	0.0833333	0.0833333	0.416667	1284.42	3.99969	-0.0833333	4.45833	0.49537	0.286667	-0.0416667	0.0833333	4.45833	0.977273	0.00819444	12.375	0.166667	0.333333	0.416667
TCGA-E2-A15O	CFLLLCYGRCGGATNKLIF	Primary Tumor	TRA	19	0.421053	0.473684	0.157895	0.105263	0.105263	0	0.105263	0.368421	2092.55	8.6795	0.105263	5.52632	0.614035	0.262105	1.02632	0.157895	5.52632	0.446594	0.00783806	7.11579	0.421053	0.210526	0.263158
TCGA-E2-A15O	CAVSELPGAGSYQLTF	Primary Tumor	TRA	16	0.5	0.625	0.125	0.0625	0	0.0625	0.125	0.625	1642.83	3.99957	-0.0625	4.98125	0.553472	0.330625	0.48125	0.125	4.98125	0.801296	0.00860953	35.8563	0.3125	0.3125	0.3125
TCGA-E2-A15O	CALSDQNDYKLSF	Primary Tumor	TRA	13	0.307692	0.538462	0.153846	0.230769	0.0769231	0.153846	0.230769	0.538462	1503.63	4.20782	-0.0769231	4.03077	0.447863	0.304615	-0.469231	0.153846	4.03077	0.107371	0.0369365	2.7	0.307692	0.230769	0.230769
TCGA-C8-A134	CAVDSNYQLIW	Primary Tumor	TRA	11	0.272727	0.545455	0.181818	0.0909091	0	0.0909091	0.0909091	0.363636	1311.46	3.79987	-0.0909091	4.8	0.533333	0.316364	0.3	0.181818	4.8	0.830136	0.00846167	12.9364	0.454545	0.181818	0.181818
TCGA-C8-A134	CAVDSNYQLIW	Primary Tumor	TRA	11	0.272727	0.545455	0.181818	0.0909091	0	0.0909091	0.0909091	0.363636	1311.46	3.79987	-0.0909091	4.8	0.533333	0.316364	0.3	0.181818	4.8	0.830136	0.00846167	12.9364	0.454545	0.181818	0.181818
TCGA-C8-A134	CAVGGGSQGNLIF	Primary Tumor	TRA	13	0.538462	0.692308	0.0769231	0	0	0	0	0.538462	1222.37	5.51813	0	5.28462	0.587179	0.259231	0.784615	0.0769231	5.28462	-1	0	29.9692	0.307692	0.461538	0.153846
TCGA-C8-A134	CALETGSQGNLIF	Primary Tumor	TRA	13	0.461538	0.538462	0.0769231	0.0769231	0	0.0769231	0.0769231	0.538462	1352.51	3.99969	-0.0769231	4.99231	0.554701	0.284615	0.492308	0.0769231	4.99231	0.976728	0.00850263	10.9846	0.307692	0.307692	0.307692
TCGA-C8-A134	CVVSPDSNYQLIW	Primary Tumor	TRA	13	0.230769	0.615385	0.153846	0.0769231	0	0.0769231	0.153846	0.384615	1523.71	3.79987	-0.0769231	4.75385	0.528205	0.364615	0.253846	0.153846	4.75385	0.730628	0.00928254	46.2462	0.461538	0.307692	0.0769231
TCGA-C8-A134	CAVGPTSGTYKYIF	Primary Tumor	TRA	14	0.5	0.642857	0.214286	0.0714286	0.0714286	0	0.142857	0.571429	1506.72	8.17523	0.0714286	4.83571	0.537302	0.340714	0.335714	0.214286	4.83571	0.115471	0.00826959	-2.84286	0.357143	0.285714	0.0714286
TCGA-C8-A134	CAVVMDFGNEKLTF	Primary Tumor	TRA	14	0.285714	0.571429	0.142857	0.214286	0.0714286	0.142857	0.214286	0.428571	1573.83	4.37018	-0.0714286	5.10714	0.56746	0.31	0.607143	0.142857	5.10714	0.191626	0.0234344	0.585714	0.357143	0.142857	0.285714
TCGA-C8-A134	CAATLGSSASKIIF	Primary Tumor	TRA	14	0.642857	0.642857	0.0714286	0.0714286	0.0714286	0	0.0714286	0.642857	1368.6	8.22223	0.0714286	5.65	0.627778	0.305714	1.15	0.0714286	5.65	0.945517	0.00826959	16.9786	0.285714	0.285714	0.285714
TCGA-C8-A134	CAVNQAGTALIF	Primary Tumor	TRA	12	0.5	0.666667	0.0833333	0	0	0	0	0.5	1207.4	5.51813	0	5.75833	0.639815	0.316667	1.25833	0.0833333	5.75833	-1	0	-4.19167	0.333333	0.166667	0.333333
TCGA-C8-A134	CATLYQTGANNLFF	Primary Tumor	TRA	14	0.428571	0.571429	0.214286	0	0	0	0	0.428571	1562.74	5.5174	0	4.90714	0.545238	0.278571	0.407143	0.214286	4.90714	-1	0	-2.84286	0.357143	0.214286	0.285714
TCGA-C8-A134	CATLYQTGANNLFF	Primary Tumor	TRA	14	0.428571	0.571429	0.214286	0	0	0	0	0.428571	1562.74	5.5174	0	4.90714	0.545238	0.278571	0.407143	0.214286	4.90714	-1	0	-2.84286	0.357143	0.214286	0.285714
TCGA-C8-A134	CILRDGYSGNTGKLIF	Primary Tumor	TRA	16	0.375	0.5	0.125	0.1875	0.125	0.0625	0.1875	0.5	1757.02	8.19733	0.0625	4.65625	0.517361	0.274375	0.15625	0.125	4.65625	0.392036	0.0117661	1.6125	0.375	0.3125	0.125
TCGA-C8-A134	CILRDGYSGNTGKLIF	Primary Tumor	TRA	16	0.375	0.5	0.125	0.1875	0.125	0.0625	0.1875	0.5	1757.02	8.19733	0.0625	4.65625	0.517361	0.274375	0.15625	0.125	4.65625	0.392036	0.0117661	1.6125	0.375	0.3125	0.125
TCGA-C8-A134	CCVLLHRQNRNQFYF	Primary Tumor	TRA	15	0.133333	0.333333	0.266667	0.133333	0.133333	0	0.133333	0.333333	1941.24	8.9566	0.133333	4.16	0.462222	0.301333	-0.34	0.2	4.16	0.51708	0.0173232	37.054	0.4	0.133333	0.133333
TCGA-C8-A134	CAFMITKNNDMRF	Primary Tumor	TRA	13	0.230769	0.461538	0.153846	0.230769	0.153846	0.0769231	0.230769	0.384615	1590.89	8.22211	0.0769231	4.39231	0.488034	0.320769	-0.107692	0.153846	4.39231	0.345335	0.00923533	3.43077	0.230769	0.153846	0.230769
TCGA-C8-A134	CAANSNSGYALNF	Primary Tumor	TRA	13	0.538462	0.769231	0.153846	0	0	0	0	0.461538	1331.41	5.5174	0	4.55385	0.505983	0.264615	0.0538462	0.153846	4.55385	-1	0	9.35385	0.230769	0.461538	0.307692
TCGA-C8-A134	CVLTLYAGNNRKLIW	Primary Tumor	TRA	15	0.266667	0.466667	0.133333	0.133333	0.133333	0	0.133333	0.333333	1764.1	9.31244	0.133333	4.88	0.542222	0.303333	0.38	0.133333	4.88	0.999558	0.0304798	8.77333	0.466667	0.2	0.266667
TCGA-C8-A134	CAGAIRSGNTGKLIF	Primary Tumor	TRA	15	0.533333	0.6	0.0666667	0.133333	0.133333	0	0.133333	0.6	1507.76	9.50775	0.133333	4.97333	0.552593	0.289333	0.473333	0.0666667	4.97333	0.188148	0.0039899	4.66667	0.266667	0.333333	0.2
TCGA-C8-A134	CAGLSRDDKIIF	Primary Tumor	TRA	12	0.333333	0.5	0.0833333	0.333333	0.166667	0.166667	0.333333	0.583333	1337.54	5.95343	0	4.775	0.530556	0.31	0.275	0.0833333	4.775	0.187383	0.0054806	11.0667	0.333333	0.166667	0.166667
TCGA-C8-A134	CIASLPPTSVPWTKGSARQLTF	Primary Tumor	TRA	22	0.454545	0.636364	0.0909091	0.0909091	0.0909091	0	0.227273	0.681818	2360.73	9.50775	0.0909091	4.62273	0.513636	0.406818	0.122727	0.0909091	4.62273	0.122518	0.0139478	38.1727	0.272727	0.318182	0.181818
TCGA-C8-A134	CAVTDYKLSF	Primary Tumor	TRA	10	0.4	0.6	0.2	0.2	0.1	0.1	0.2	0.5	1146.31	5.82794	0	4.99	0.554444	0.309	0.49	0.2	4.99	0.185885	0.0127778	-7.98	0.4	0.1	0.2
TCGA-C8-A134	CAVGAFTGGGNKLTF	Primary Tumor	TRA	15	0.6	0.733333	0.133333	0.0666667	0.0666667	0	0.0666667	0.6	1442.64	8.22223	0.0666667	5.12	0.568889	0.263333	0.62	0.133333	5.12	0.920366	0.0079798	21.5	0.266667	0.333333	0.2
TCGA-C8-A134	CAVGAGTGGGNKLTF	Primary Tumor	TRA	15	0.666667	0.8	0.0666667	0.0666667	0.0666667	0	0.0666667	0.666667	1352.52	8.22223	0.0666667	4.90667	0.545185	0.260667	0.406667	0.0666667	4.90667	0.920366	0.0079798	15.84	0.2	0.4	0.2
TCGA-C8-A134	CAVGAGTGGGNKLTF	Primary Tumor	TRA	15	0.666667	0.8	0.0666667	0.0666667	0.0666667	0	0.0666667	0.666667	1352.52	8.22223	0.0666667	4.90667	0.545185	0.260667	0.406667	0.0666667	4.90667	0.920366	0.0079798	15.84	0.2	0.4	0.2
TCGA-C8-A134	CAVGAGTGGGNKLTF	Primary Tumor	TRA	15	0.666667	0.8	0.0666667	0.0666667	0.0666667	0	0.0666667	0.666667	1352.52	8.22223	0.0666667	4.90667	0.545185	0.260667	0.406667	0.0666667	4.90667	0.920366	0.0079798	15.84	0.2	0.4	0.2
TCGA-C8-A134	CAGHLAGRRALTF	Primary Tumor	TRA	13	0.538462	0.538462	0.153846	0.153846	0.153846	0	0.153846	0.692308	1372.6	10.3521	0.153846	4.85385	0.539316	0.273077	0.353846	0.0769231	4.85385	0.730628	0.0306825	62.7846	0.230769	0.153846	0.384615
TCGA-A1-A0SP	CAVSDQTGANNLFF	Primary Tumor	TRA	14	0.428571	0.714286	0.142857	0.0714286	0	0.0714286	0.0714286	0.5	1486.6	3.79987	-0.0714286	4.77143	0.530159	0.287143	0.271429	0.142857	4.77143	0.991678	0.00906148	-2.84286	0.285714	0.285714	0.214286
TCGA-A1-A0SP	CALSDIGGADGLTF	Primary Tumor	TRA	14	0.571429	0.714286	0.0714286	0.142857	0	0.142857	0.142857	0.642857	1339.47	3.56366	-0.142857	5.30714	0.589683	0.255714	0.807143	0.0714286	5.30714	0.104743	0.00390023	14.7857	0.285714	0.285714	0.285714
TCGA-A1-A0SP	CATDRGSTLGRLYF	Primary Tumor	TRA	14	0.5	0.571429	0.142857	0.214286	0.142857	0.0714286	0.214286	0.642857	1559.74	8.22186	0.0714286	4.35	0.483333	0.265714	-0.15	0.142857	4.35	0.163533	0.0136974	-2.16429	0.285714	0.214286	0.214286
TCGA-A1-A0SP	CAGQTSRNSGNTPLVF	Primary Tumor	TRA	16	0.5	0.75	0.0625	0.0625	0.0625	0	0.125	0.625	1651.8	8.24969	0.0625	4.16875	0.463194	0.328125	-0.33125	0.0625	4.16875	0.281667	0.00892519	18.5125	0.1875	0.4375	0.125
TCGA-A1-A0SP	CAASGGGGADGLTF	Primary Tumor	TRA	14	0.785714	0.857143	0.0714286	0.0714286	0	0.0714286	0.0714286	0.785714	1183.25	3.79987	-0.0714286	5.03571	0.559524	0.234286	0.535714	0.0714286	5.03571	0.991678	0.00906148	32.4143	0.142857	0.428571	0.285714
TCGA-A1-A0SP	CAAYGGSQGNLIF	Primary Tumor	TRA	13	0.538462	0.615385	0.153846	0	0	0	0	0.538462	1300.44	5.5174	0	5.03077	0.558974	0.266923	0.530769	0.153846	5.03077	-1	0	20.4769	0.307692	0.384615	0.230769
TCGA-A1-A0SP	CAESMASGTYKYIF	Primary Tumor	TRA	14	0.5	0.5	0.214286	0.142857	0.0714286	0.0714286	0.142857	0.571429	1570.78	5.99286	0	4.68571	0.520635	0.308571	0.185714	0.214286	4.68571	0.343039	0.0248025	25.7929	0.285714	0.214286	0.285714
TCGA-A1-A0SP	CAESMASGTYKYIF	Primary Tumor	TRA	14	0.5	0.5	0.214286	0.142857	0.0714286	0.0714286	0.142857	0.571429	1570.78	5.99286	0	4.68571	0.520635	0.308571	0.185714	0.214286	4.68571	0.343039	0.0248025	25.7929	0.285714	0.214286	0.285714
TCGA-A1-A0SP	CAASINQAGTALIF	Primary Tumor	TRA	14	0.571429	0.642857	0.0714286	0	0	0	0	0.571429	1379.58	5.51813	0	5.67143	0.630159	0.315	1.17143	0.0714286	5.67143	-1	0	-2.16429	0.285714	0.214286	0.357143
TCGA-A1-A0SP	CAASINQAGTALIF	Primary Tumor	TRA	14	0.571429	0.642857	0.0714286	0	0	0	0	0.571429	1379.58	5.51813	0	5.67143	0.630159	0.315	1.17143	0.0714286	5.67143	-1	0	-2.16429	0.285714	0.214286	0.357143
TCGA-AR-A5QQ	CAMNTGFQKLVF	Primary Tumor	TRA	12	0.333333	0.5	0.166667	0.0833333	0.0833333	0	0.0833333	0.416667	1358.63	8.22223	0.0833333	5.15	0.572222	0.313333	0.65	0.166667	5.15	0.965909	0.00861111	-12.0583	0.333333	0.166667	0.25
TCGA-AR-A5QQ	CAMRGIKAAGNKLTF	Primary Tumor	TRA	15	0.466667	0.533333	0.0666667	0.2	0.2	0	0.2	0.6	1580.92	10.062	0.2	4.74	0.526667	0.324667	0.24	0.0666667	4.74	0.076513	0.00752525	0.02	0.2	0.2	0.333333
TCGA-AR-A5QQ	CIVSGGTSGSRLTF	Primary Tumor	TRA	14	0.642857	0.714286	0.0714286	0.0714286	0.0714286	0	0.0714286	0.642857	1384.56	8.24969	0.0714286	5.09286	0.565873	0.255	0.592857	0.0714286	5.09286	0.945517	0.00826959	28.5429	0.285714	0.428571	0.0714286
TCGA-AR-A5QQ	CAVNAGGTSYGKLTF	Primary Tumor	TRA	15	0.6	0.733333	0.133333	0.0666667	0.0666667	0	0.0666667	0.6	1488.66	8.19745	0.0666667	4.82	0.535556	0.276	0.32	0.133333	4.82	0.920366	0.0079798	3.14667	0.266667	0.333333	0.2
TCGA-BH-A0HP	CALLGYLNTGNQFYF	Primary Tumor	TRA	15	0.333333	0.466667	0.266667	0	0	0	0	0.333333	1723.94	5.51678	0	4.94667	0.54963	0.255333	0.446667	0.266667	4.94667	-1	0	-1.626	0.466667	0.266667	0.266667
TCGA-BH-A0HP	CALLGYLNTGNQFYF	Primary Tumor	TRA	15	0.333333	0.466667	0.266667	0	0	0	0	0.333333	1723.94	5.51678	0	4.94667	0.54963	0.255333	0.446667	0.266667	4.94667	-1	0	-1.626	0.466667	0.266667	0.266667
TCGA-A8-A07W	CAGDTGANSKLTF	Primary Tumor	TRA	13	0.615385	0.769231	0.0769231	0.153846	0.0769231	0.0769231	0.153846	0.692308	1284.4	5.82867	0	4.40769	0.489744	0.282308	-0.0923077	0.0769231	4.40769	0.0968171	0.0316667	-12.4308	0.153846	0.307692	0.230769
TCGA-A8-A07W	CSVLLCSPTSGTYKYIF	Primary Tumor	TRA	17	0.470588	0.588235	0.176471	0.0588235	0.0588235	0	0.117647	0.470588	1882.2	8.0329	0.0588235	5.19412	0.577124	0.322353	0.694118	0.176471	5.19412	0.352029	0.0073558	30.2647	0.411765	0.294118	0.117647
TCGA-A8-A07W	CAVPSGGSYIPTF	Primary Tumor	TRA	13	0.538462	0.769231	0.153846	0	0	0	0.153846	0.615385	1298.46	5.5174	0	5.13077	0.570085	0.375385	0.630769	0.153846	5.13077	0.233903	0	55.6308	0.307692	0.461538	0.0769231
TCGA-B6-A0RM	CAGEVTGGGNKLTF	Primary Tumor	TRA	14	0.571429	0.714286	0.0714286	0.142857	0.0714286	0.0714286	0.142857	0.642857	1353.5	5.99432	0	4.58571	0.509524	0.273571	0.0857143	0.0714286	4.58571	0.229255	0.0283457	23	0.214286	0.357143	0.214286
TCGA-B6-A0RM	CAGEVTGGGNKLTF	Primary Tumor	TRA	14	0.571429	0.714286	0.0714286	0.142857	0.0714286	0.0714286	0.142857	0.642857	1353.5	5.99432	0	4.58571	0.509524	0.273571	0.0857143	0.0714286	4.58571	0.229255	0.0283457	23	0.214286	0.357143	0.214286
TCGA-HN-A2OB	CAVGTSNTGKLIF	Primary Tumor	TRA	13	0.538462	0.692308	0.0769231	0.0769231	0.0769231	0	0.0769231	0.538462	1310.52	8.22223	0.0769231	5.20769	0.578632	0.290769	0.707692	0.0769231	5.20769	0.976728	0.00850263	-29.9538	0.307692	0.307692	0.153846
TCGA-HN-A2OB	CAVGTSNTGKLIF	Primary Tumor	TRA	13	0.538462	0.692308	0.0769231	0.0769231	0.0769231	0	0.0769231	0.538462	1310.52	8.22223	0.0769231	5.20769	0.578632	0.290769	0.707692	0.0769231	5.20769	0.976728	0.00850263	-29.9538	0.307692	0.307692	0.153846
TCGA-AC-A3W6	CSEEDTDKLIF	Primary Tumor	TRA	11	0.272727	0.454545	0.0909091	0.454545	0.0909091	0.363636	0.454545	0.636364	1299.4	3.91656	-0.272727	3.97273	0.441414	0.328182	-0.527273	0.0909091	3.97273	0.106227	0.0959891	44.6455	0.272727	0.0909091	0.272727
TCGA-AC-A3W6	CSEEDTDKLIF	Primary Tumor	TRA	11	0.272727	0.454545	0.0909091	0.454545	0.0909091	0.363636	0.454545	0.636364	1299.4	3.91656	-0.272727	3.97273	0.441414	0.328182	-0.527273	0.0909091	3.97273	0.106227	0.0959891	44.6455	0.272727	0.0909091	0.272727
TCGA-AC-A3W6	CTSVQPNQAGTALIF	Primary Tumor	TRA	15	0.466667	0.666667	0.0666667	0	0	0	0.0666667	0.6	1549.75	5.51813	0	4.94667	0.54963	0.368	0.446667	0.0666667	4.94667	1	0	33.22	0.266667	0.266667	0.2
TCGA-AC-A3W6	CHLLLCPIPNTGTASKLTF	Primary Tumor	TRA	19	0.421053	0.578947	0.105263	0.0526316	0.0526316	0	0.157895	0.526316	2029.43	8.06805	0.0526316	5.14211	0.571345	0.355263	0.642105	0.0526316	5.14211	0.392085	0.00675839	23.8737	0.315789	0.263158	0.263158
TCGA-AC-A3W6	CTTASWVTGGGSQGNLIF	Primary Tumor	TRA	18	0.611111	0.722222	0.111111	0	0	0	0	0.611111	1798.97	5.51813	0	4.85556	0.539506	0.267778	0.355556	0.111111	4.85556	-1	0	33.1	0.277778	0.388889	0.111111
TCGA-AC-A3W6	CAMSAPSGTYKYIF	Primary Tumor	TRA	14	0.5	0.571429	0.214286	0.0714286	0.0714286	0	0.142857	0.571429	1538.79	8.17523	0.0714286	4.82143	0.535714	0.35	0.321429	0.214286	4.82143	0.156361	0.00826959	62.1214	0.285714	0.285714	0.214286
TCGA-AC-A3W6	CVVSDPVSNDYKLSF	Primary Tumor	TRA	15	0.266667	0.733333	0.133333	0.2	0.0666667	0.133333	0.266667	0.466667	1672.85	4.20782	-0.0666667	4.63333	0.514815	0.348667	0.133333	0.133333	4.63333	0.0558874	0.0217144	11.4867	0.4	0.333333	0.0666667
TCGA-AC-A3W6	CTSVQPNQAGTALIF	Primary Tumor	TRA	15	0.466667	0.666667	0.0666667	0	0	0	0.0666667	0.6	1549.75	5.51813	0	4.94667	0.54963	0.368	0.446667	0.0666667	4.94667	1	0	33.22	0.266667	0.266667	0.2
TCGA-AC-A3W6	CTSVQPNQAGTALIF	Primary Tumor	TRA	15	0.466667	0.666667	0.0666667	0	0	0	0.0666667	0.6	1549.75	5.51813	0	4.94667	0.54963	0.368	0.446667	0.0666667	4.94667	1	0	33.22	0.266667	0.266667	0.2
TCGA-AC-A3W6	CRRGMDSSYKLIF	Primary Tumor	TRA	13	0.307692	0.384615	0.153846	0.307692	0.230769	0.0769231	0.307692	0.538462	1575.85	9.31073	0.153846	4.17692	0.464103	0.299231	-0.323077	0.153846	4.17692	0.0871523	0.0133465	69.8615	0.307692	0.230769	0.153846
TCGA-D8-A1XA	CRHLLPPFAGAGSYQLTF	Primary Tumor	TRA	18	0.388889	0.5	0.222222	0.0555556	0.0555556	0	0.166667	0.611111	1978.28	8.2309	0.0555556	4.78333	0.531481	0.346111	0.283333	0.166667	4.78333	0.785038	0.00506851	54.3833	0.333333	0.277778	0.277778
TCGA-D8-A1XA	CRHLLPPFAGAGSYQLTF	Primary Tumor	TRA	18	0.388889	0.5	0.222222	0.0555556	0.0555556	0	0.166667	0.611111	1978.28	8.2309	0.0555556	4.78333	0.531481	0.346111	0.283333	0.166667	4.78333	0.785038	0.00506851	54.3833	0.333333	0.277778	0.277778
TCGA-D8-A1XA	CRHLLPPFAGAGSYQLTF	Primary Tumor	TRA	18	0.388889	0.5	0.222222	0.0555556	0.0555556	0	0.166667	0.611111	1978.28	8.2309	0.0555556	4.78333	0.531481	0.346111	0.283333	0.166667	4.78333	0.785038	0.00506851	54.3833	0.333333	0.277778	0.277778
TCGA-D8-A147	CAVKNSNSGYALNF	Primary Tumor	TRA	14	0.428571	0.714286	0.142857	0.0714286	0.0714286	0	0.0714286	0.428571	1487.64	8.19745	0.0714286	4.44286	0.493651	0.287143	-0.0571429	0.142857	4.44286	0.945517	0.00826959	7.34286	0.285714	0.428571	0.214286
TCGA-D8-A147	CLLPLCCDGVGNTPLVF	Primary Tumor	TRA	17	0.352941	0.705882	0.0588235	0.0588235	0	0.0588235	0.176471	0.352941	1764.14	3.79974	-0.0588235	5.80588	0.645098	0.341765	1.30588	0.0588235	5.80588	0.100776	0.00867011	28.4176	0.411765	0.294118	0.235294
TCGA-D8-A147	CAVGGRNSGYALNF	Primary Tumor	TRA	14	0.5	0.714286	0.142857	0.0714286	0.0714286	0	0.0714286	0.5	1428.57	8.22198	0.0714286	4.65	0.516667	0.256429	0.15	0.142857	4.65	1	0.00928193	20.9643	0.285714	0.428571	0.214286
TCGA-D8-A147	CITVLPIGANNLFF	Primary Tumor	TRA	14	0.285714	0.571429	0.142857	0	0	0	0.0714286	0.285714	1521.82	5.51813	0	6	0.666667	0.328571	1.5	0.142857	6	1	0	16.9786	0.5	0.285714	0.214286
TCGA-D8-A147	CATDAVTNAGKSTF	Primary Tumor	TRA	14	0.642857	0.857143	0.0714286	0.142857	0.0714286	0.0714286	0.142857	0.714286	1385.5	5.82867	0	4.55	0.505556	0.312857	0.05	0.0714286	4.55	0.229255	0.0283457	-4.76429	0.142857	0.214286	0.214286
TCGA-D8-A147	CILRGTSGTYKYIF	Primary Tumor	TRA	14	0.428571	0.428571	0.214286	0.142857	0.142857	0	0.142857	0.5	1621.9	9.19598	0.142857	4.79286	0.53254	0.287143	0.292857	0.214286	4.79286	0.229255	0.00473268	18.6071	0.428571	0.214286	0.0714286
TCGA-D8-A147	CGALEYGNKLVF	Primary Tumor	TRA	12	0.333333	0.5	0.166667	0.166667	0.0833333	0.0833333	0.166667	0.416667	1313.52	5.99359	0	4.99167	0.55463	0.285	0.491667	0.166667	4.99167	0.119457	0.0274206	0.6	0.416667	0.25	0.333333
TCGA-D8-A147	CAVGGRNSGYALNF	Primary Tumor	TRA	14	0.5	0.714286	0.142857	0.0714286	0.0714286	0	0.0714286	0.5	1428.57	8.22198	0.0714286	4.65	0.516667	0.256429	0.15	0.142857	4.65	1	0.00928193	20.9643	0.285714	0.428571	0.214286
TCGA-D8-A147	CAVNRPMNSGYSTLTF	Primary Tumor	TRA	16	0.4375	0.6875	0.125	0.0625	0.0625	0	0.125	0.5	1760.99	8.22198	0.0625	4.45	0.494444	0.325	-0.05	0.125	4.45	0.970425	0.00860953	19.1062	0.25	0.375	0.1875
TCGA-D8-A147	CAGALTGGGNKLTF	Primary Tumor	TRA	14	0.642857	0.714286	0.0714286	0.0714286	0.0714286	0	0.0714286	0.642857	1309.49	8.22223	0.0714286	4.93571	0.548413	0.259286	0.435714	0.0714286	4.93571	0.945517	0.00826959	28.3857	0.214286	0.357143	0.285714
TCGA-D8-A147	CAVSPFSGGYNKLIF	Primary Tumor	TRA	15	0.4	0.6	0.2	0.0666667	0.0666667	0	0.133333	0.466667	1602.85	8.19745	0.0666667	5.14667	0.571852	0.32	0.646667	0.2	5.14667	0.24067	0.0079798	64.16	0.4	0.4	0.133333
TCGA-D8-A147	CLVGYSSASKIIF	Primary Tumor	TRA	13	0.461538	0.538462	0.153846	0.0769231	0.0769231	0	0.0769231	0.461538	1387.64	8.19745	0.0769231	5.73846	0.637607	0.296923	1.23846	0.153846	5.73846	0.976728	0.00850263	19.2692	0.461538	0.307692	0.153846
TCGA-AO-A12A	CCEYGFGNEKLTF	Primary Tumor	TRA	13	0.384615	0.461538	0.230769	0.230769	0.0769231	0.153846	0.230769	0.461538	1510.69	4.53131	-0.0769231	4.28462	0.476068	0.275385	-0.215385	0.230769	4.28462	0.166715	0.0120748	-0.869231	0.307692	0.230769	0.230769
TCGA-AO-A12A	CICVVTAGREYGNKLVF	Primary Tumor	TRA	17	0.352941	0.588235	0.117647	0.176471	0.117647	0.0588235	0.176471	0.411765	1872.22	8.04547	0.0588235	5.22353	0.580392	0.311765	0.723529	0.117647	5.22353	0.535348	0.00802473	-1.07059	0.411765	0.176471	0.176471
TCGA-AO-A12A	CAVRSGGGADGLTF	Primary Tumor	TRA	14	0.642857	0.785714	0.0714286	0.142857	0.0714286	0.0714286	0.142857	0.714286	1310.44	5.82941	0	4.91429	0.546032	0.253571	0.414286	0.0714286	4.91429	0.115471	0.0318889	54.9857	0.214286	0.357143	0.214286
TCGA-AO-A12A	CSESPGYSSASKIIF	Primary Tumor	TRA	15	0.533333	0.6	0.133333	0.133333	0.0666667	0.0666667	0.2	0.666667	1575.74	5.99359	0	4.59333	0.51037	0.342	0.0933333	0.133333	4.59333	0.266768	0.0224495	65.8267	0.266667	0.466667	0.133333
TCGA-AR-A1AJ	CAVGGDSSYKLIF	Primary Tumor	TRA	13	0.461538	0.615385	0.153846	0.153846	0.0769231	0.0769231	0.153846	0.538462	1359.55	5.82794	0	5.15385	0.57265	0.281538	0.653846	0.153846	5.15385	0.214446	0.0259722	35.2923	0.384615	0.307692	0.153846
TCGA-AR-A1AJ	CLLPLCCYFSGGYNKLIF	Primary Tumor	TRA	18	0.333333	0.444444	0.222222	0.0555556	0.0555556	0	0.111111	0.277778	2054.5	7.94012	0.0555556	5.58889	0.620988	0.292778	1.08889	0.222222	5.58889	0.479985	0.0070506	41.4222	0.5	0.277778	0.222222
TCGA-AR-A1AJ	CLLPLCCYFSGGYNKLIF	Primary Tumor	TRA	18	0.333333	0.444444	0.222222	0.0555556	0.0555556	0	0.111111	0.277778	2054.5	7.94012	0.0555556	5.58889	0.620988	0.292778	1.08889	0.222222	5.58889	0.479985	0.0070506	41.4222	0.5	0.277778	0.222222
TCGA-AR-A1AJ	CAVLSGNTPLVF	Primary Tumor	TRA	12	0.416667	0.75	0.0833333	0	0	0	0.0833333	0.416667	1220.44	5.51813	0	5.84167	0.649074	0.334167	1.34167	0.0833333	5.84167	0.965909	0	-4.98333	0.416667	0.333333	0.25
TCGA-AR-A1AJ	CAAVSYSGGYNKLIF	Primary Tumor	TRA	15	0.466667	0.6	0.2	0.0666667	0.0666667	0	0.0666667	0.466667	1592.81	8.17523	0.0666667	5.1	0.566667	0.283333	0.6	0.2	5.1	0.920366	0.0079798	22.0267	0.4	0.333333	0.2
TCGA-AR-A1AJ	CAVSFDYKLSF	Primary Tumor	TRA	11	0.363636	0.545455	0.272727	0.181818	0.0909091	0.0909091	0.181818	0.454545	1279.46	5.82794	0	5.19091	0.576768	0.289091	0.690909	0.272727	5.19091	0.318621	0.0132011	12.5909	0.454545	0.181818	0.181818
TCGA-AR-A1AJ	CAVEDQSFQKLVF	Primary Tumor	TRA	13	0.230769	0.461538	0.153846	0.230769	0.0769231	0.153846	0.230769	0.538462	1513.71	4.37018	-0.0769231	4.76154	0.52906	0.350769	0.261538	0.153846	4.76154	0.0869945	0.0670268	51.3154	0.384615	0.0769231	0.230769
TCGA-AR-A1AJ	CAVEDQSFQKLVF	Primary Tumor	TRA	13	0.230769	0.461538	0.153846	0.230769	0.0769231	0.153846	0.230769	0.538462	1513.71	4.37018	-0.0769231	4.76154	0.52906	0.350769	0.261538	0.153846	4.76154	0.0869945	0.0670268	51.3154	0.384615	0.0769231	0.230769
TCGA-AR-A1AJ	CCERHNPGNNRLAF	Primary Tumor	TRA	14	0.285714	0.571429	0.142857	0.214286	0.142857	0.0714286	0.285714	0.5	1630.81	8.08185	0.0714286	3.44286	0.38254	0.328571	-1.05714	0.0714286	3.44286	0.0736195	0.0136974	31.8357	0.142857	0.357143	0.214286
TCGA-AR-A1AJ	CCERHNPGNNRLAF	Primary Tumor	TRA	14	0.285714	0.571429	0.142857	0.214286	0.142857	0.0714286	0.285714	0.5	1630.81	8.08185	0.0714286	3.44286	0.38254	0.328571	-1.05714	0.0714286	3.44286	0.0736195	0.0136974	31.8357	0.142857	0.357143	0.214286
TCGA-AR-A1AJ	CCERRGRGGADGLTF	Primary Tumor	TRA	15	0.533333	0.6	0.0666667	0.333333	0.2	0.133333	0.333333	0.733333	1597.78	8.0722	0.0666667	3.87333	0.43037	0.265333	-0.626667	0.0666667	3.87333	0.0770102	0.055157	41.3333	0.133333	0.266667	0.2
TCGA-AR-A1AJ	CVVSVPTVRARLMF	Primary Tumor	TRA	14	0.285714	0.642857	0.0714286	0.142857	0.142857	0	0.214286	0.428571	1577.96	10.3519	0.142857	5.75	0.638889	0.376429	1.25	0.0714286	5.75	0.19714	0.0260166	17.6571	0.428571	0.142857	0.214286
TCGA-AR-A1AJ	CAVGAANDYKLSF	Primary Tumor	TRA	13	0.461538	0.692308	0.153846	0.153846	0.0769231	0.0769231	0.153846	0.538462	1358.52	5.82794	0	4.90769	0.545299	0.300769	0.407692	0.153846	4.90769	0.649958	0.0101389	-10.3615	0.307692	0.230769	0.307692
TCGA-AR-A1AJ	CAMRDSFSGGYNKLIF	Primary Tumor	TRA	16	0.375	0.5	0.1875	0.1875	0.125	0.0625	0.1875	0.5	1809.07	8.19733	0.0625	4.5625	0.506944	0.278125	0.0625	0.1875	4.5625	0.392036	0.0117661	28.6	0.3125	0.3125	0.1875
TCGA-AR-A1AJ	CAVSSPHTGRRALTF	Primary Tumor	TRA	15	0.533333	0.666667	0.133333	0.133333	0.133333	0	0.2	0.733333	1602.82	10.3521	0.133333	4.48	0.497778	0.333333	-0.02	0.0666667	4.48	0.209545	0.0309848	87.1933	0.2	0.266667	0.2
TCGA-AR-A1AJ	CALISPNSGNTPLVF	Primary Tumor	TRA	15	0.4	0.733333	0.0666667	0	0	0	0.133333	0.466667	1532.76	5.51813	0	5.2	0.577778	0.368	0.7	0.0666667	5.2	0.188148	0	27.3067	0.333333	0.466667	0.2
TCGA-AR-A1AJ	CALSEEGTGRRALTF	Primary Tumor	TRA	15	0.533333	0.533333	0.0666667	0.266667	0.133333	0.133333	0.266667	0.733333	1610.79	6.13678	0	4.33333	0.481481	0.292	-0.166667	0.0666667	4.33333	0.0618499	0.106571	79	0.2	0.2	0.4
TCGA-AR-A1AJ	CAVQVASNTGKLIF	Primary Tumor	TRA	14	0.428571	0.642857	0.0714286	0.0714286	0.0714286	0	0.0714286	0.5	1450.7	8.22223	0.0714286	5.41429	0.601587	0.33	0.914286	0.0714286	5.41429	0.945517	0.00826959	-20.3571	0.357143	0.214286	0.214286
TCGA-AR-A1AJ	CAVDPSSGTYKYIF	Primary Tumor	TRA	14	0.428571	0.642857	0.214286	0.142857	0.0714286	0.0714286	0.214286	0.571429	1550.73	5.82733	0	4.60714	0.511905	0.347143	0.107143	0.214286	4.60714	0.163533	0.0283457	20	0.357143	0.285714	0.0714286
TCGA-AR-A1AJ	CIVRVSRNYQLIW	Primary Tumor	TRA	13	0.153846	0.384615	0.153846	0.153846	0.153846	0	0.153846	0.307692	1649.96	9.50409	0.153846	4.86154	0.540171	0.334615	0.361538	0.153846	4.86154	0.432202	0.0175148	27.0077	0.538462	0.153846	0.0769231
TCGA-AR-A1AJ	CAARSGGGADGLTF	Primary Tumor	TRA	14	0.714286	0.785714	0.0714286	0.142857	0.0714286	0.0714286	0.142857	0.785714	1282.38	5.82941	0	4.74286	0.526984	0.252143	0.242857	0.0714286	4.74286	0.115471	0.0318889	54.9857	0.142857	0.357143	0.285714
TCGA-AR-A1AJ	CAARSGGGADGLTF	Primary Tumor	TRA	14	0.714286	0.785714	0.0714286	0.142857	0.0714286	0.0714286	0.142857	0.785714	1282.38	5.82941	0	4.74286	0.526984	0.252143	0.242857	0.0714286	4.74286	0.115471	0.0318889	54.9857	0.142857	0.357143	0.285714
TCGA-AR-A1AJ	CAYRSEAGAQKLVF	Primary Tumor	TRA	14	0.428571	0.5	0.142857	0.214286	0.142857	0.0714286	0.214286	0.642857	1542.76	8.19757	0.0714286	4.55714	0.506349	0.333571	0.0571429	0.142857	4.55714	0.0876016	0.0156427	30.2214	0.285714	0.142857	0.357143
TCGA-AR-A1AJ	CARNAGGTSYGKLTF	Primary Tumor	TRA	15	0.6	0.666667	0.133333	0.133333	0.133333	0	0.133333	0.666667	1545.72	9.31244	0.133333	4.24	0.471111	0.275333	-0.26	0.133333	4.24	0.430539	0.00770202	11.3733	0.2	0.333333	0.2
TCGA-AR-A1AJ	CVVTTITASTGNQFYF	Primary Tumor	TRA	16	0.5	0.6875	0.1875	0	0	0	0	0.5	1751.95	5.5174	0	5.15625	0.572917	0.301875	0.65625	0.1875	5.15625	-1	0	-0.305625	0.375	0.1875	0.0625
TCGA-AR-A1AJ	CAVDPSSGTYKYIF	Primary Tumor	TRA	14	0.428571	0.642857	0.214286	0.142857	0.0714286	0.0714286	0.214286	0.571429	1550.73	5.82733	0	4.60714	0.511905	0.347143	0.107143	0.214286	4.60714	0.163533	0.0283457	20	0.357143	0.285714	0.0714286
TCGA-AR-A1AJ	CAETRGVEGTYKYIF	Primary Tumor	TRA	15	0.4	0.466667	0.2	0.266667	0.133333	0.133333	0.266667	0.6	1736.94	6.13458	0	4.20667	0.467407	0.316667	-0.293333	0.2	4.20667	0.0686513	0.0134119	-1.98667	0.333333	0.133333	0.2
TCGA-AR-A1AJ	CILRGSSNTGKLIF	Primary Tumor	TRA	14	0.428571	0.5	0.0714286	0.142857	0.142857	0	0.142857	0.5	1508.78	9.50775	0.142857	4.99286	0.554762	0.282143	0.492857	0.0714286	4.99286	0.229255	0.00473268	20.2357	0.357143	0.357143	0.142857
TCGA-AR-A1AJ	CCERHWGVSSNTGKLIF	Primary Tumor	TRA	17	0.411765	0.529412	0.176471	0.176471	0.117647	0.0588235	0.176471	0.529412	1937.21	8.06818	0.0588235	4.36471	0.484967	0.284118	-0.135294	0.117647	4.36471	0.539098	0.0109939	4.3	0.294118	0.294118	0.117647
TCGA-AR-A1AJ	CAVKGGANNLFF	Primary Tumor	TRA	12	0.416667	0.666667	0.166667	0.0833333	0.0833333	0	0.0833333	0.416667	1240.43	8.22223	0.0833333	5.16667	0.574074	0.276667	0.666667	0.166667	5.16667	0.965909	0.00861111	2.9	0.333333	0.333333	0.25
TCGA-AR-A1AJ	CAVKGGANNLFF	Primary Tumor	TRA	12	0.416667	0.666667	0.166667	0.0833333	0.0833333	0	0.0833333	0.416667	1240.43	8.22223	0.0833333	5.16667	0.574074	0.276667	0.666667	0.166667	5.16667	0.965909	0.00861111	2.9	0.333333	0.333333	0.25
TCGA-AR-A1AJ	CAVKGGANNLFF	Primary Tumor	TRA	12	0.416667	0.666667	0.166667	0.0833333	0.0833333	0	0.0833333	0.416667	1240.43	8.22223	0.0833333	5.16667	0.574074	0.276667	0.666667	0.166667	5.16667	0.965909	0.00861111	2.9	0.333333	0.333333	0.25
TCGA-AR-A1AJ	CRLSYLPLCCLMDSNYQLIW	Primary Tumor	TRA	20	0.25	0.4	0.15	0.1	0.05	0.05	0.15	0.3	2434.92	5.81464	0	5.06	0.562222	0.3205	0.56	0.15	5.06	0.262167	0.0161574	38.39	0.45	0.2	0.3
TCGA-AR-A1AJ	CRLSYLPLCCLMDSNYQLIW	Primary Tumor	TRA	20	0.25	0.4	0.15	0.1	0.05	0.05	0.15	0.3	2434.92	5.81464	0	5.06	0.562222	0.3205	0.56	0.15	5.06	0.262167	0.0161574	38.39	0.45	0.2	0.3
TCGA-AR-A1AJ	CAVISGDSNYQLIW	Primary Tumor	TRA	14	0.357143	0.571429	0.142857	0.0714286	0	0.0714286	0.0714286	0.428571	1568.75	3.79987	-0.0714286	4.97143	0.552381	0.302857	0.471429	0.142857	4.97143	1	0.00928193	23.0429	0.428571	0.285714	0.142857
TCGA-AR-A1AJ	CAVISGDSNYQLIW	Primary Tumor	TRA	14	0.357143	0.571429	0.142857	0.0714286	0	0.0714286	0.0714286	0.428571	1568.75	3.79987	-0.0714286	4.97143	0.552381	0.302857	0.471429	0.142857	4.97143	1	0.00928193	23.0429	0.428571	0.285714	0.142857
TCGA-AR-A1AJ	CAVSGGGATNKLIF	Primary Tumor	TRA	14	0.571429	0.714286	0.0714286	0.0714286	0.0714286	0	0.0714286	0.571429	1337.54	8.22223	0.0714286	5.30714	0.589683	0.282857	0.807143	0.0714286	5.30714	0.945517	0.00826959	20.9643	0.285714	0.357143	0.214286
TCGA-AR-A1AJ	CATRNNNARLMF	Primary Tumor	TRA	12	0.333333	0.583333	0.0833333	0.166667	0.166667	0	0.166667	0.416667	1410.62	10.3519	0.166667	4.03333	0.448148	0.304167	-0.466667	0.0833333	4.03333	0.0470281	0.00253968	19.45	0.166667	0.25	0.333333
TCGA-AR-A1AJ	CRPGSGNTPLVF	Primary Tumor	TRA	12	0.416667	0.75	0.0833333	0.0833333	0.0833333	0	0.25	0.583333	1247.42	8.24969	0.0833333	4.48333	0.498148	0.376667	-0.0166667	0.0833333	4.48333	0.172808	0.00777778	11.0667	0.25	0.5	0.0833333
TCGA-AR-A1AJ	CCTRGGNTPLVF	Primary Tumor	TRA	12	0.5	0.75	0.0833333	0.0833333	0.0833333	0	0.166667	0.5	1267.48	8.07208	0.0833333	4.83333	0.537037	0.320833	0.333333	0.0833333	4.83333	0.0470281	0.00861111	25.3917	0.25	0.333333	0.0833333
TCGA-AR-A1AJ	CAVRDANAGKSTF	Primary Tumor	TRA	13	0.538462	0.769231	0.0769231	0.230769	0.153846	0.0769231	0.230769	0.692308	1339.48	8.22211	0.0769231	4.31538	0.479487	0.316923	-0.184615	0.0769231	4.31538	0.0869945	0.0125253	12.1923	0.153846	0.230769	0.230769
TCGA-AR-A1AJ	CAALGSWGKLQF	Primary Tumor	TRA	12	0.5	0.5	0.166667	0.0833333	0.0833333	0	0.0833333	0.583333	1280.49	8.22223	0.0833333	5.05	0.561111	0.29	0.55	0.166667	5.05	0.965909	0.00861111	7.25833	0.333333	0.25	0.333333
TCGA-AR-A1AJ	CAASSNQGGKLIF	Primary Tumor	TRA	13	0.538462	0.615385	0.0769231	0.0769231	0.0769231	0	0.0769231	0.615385	1295.46	8.22223	0.0769231	4.8	0.533333	0.299231	0.3	0.0769231	4.8	0.976728	0.00850263	14.6769	0.230769	0.384615	0.230769
TCGA-AR-A1AJ	CAAGYNFNKFYF	Primary Tumor	TRA	12	0.333333	0.5	0.416667	0.0833333	0.0833333	0	0.0833333	0.333333	1444.61	8.17523	0.0833333	4.55	0.505556	0.269167	0.05	0.416667	4.55	0.965909	0.00861111	36.4675	0.416667	0.25	0.166667
TCGA-AR-A1AJ	CVVSAGYQKVTF	Primary Tumor	TRA	12	0.416667	0.666667	0.166667	0.0833333	0.0833333	0	0.0833333	0.5	1301.51	8.19745	0.0833333	5.25833	0.584259	0.3325	0.758333	0.166667	5.25833	0.965909	0.00861111	-8.05833	0.416667	0.166667	0.0833333
TCGA-AR-A1AJ	CAESRAGGGNKLTF	Primary Tumor	TRA	14	0.571429	0.642857	0.0714286	0.214286	0.142857	0.0714286	0.214286	0.714286	1410.56	8.22223	0.0714286	4.11429	0.457143	0.284286	-0.385714	0.0714286	4.11429	0.145654	0.0163235	68.0286	0.142857	0.357143	0.285714
TCGA-AR-A1AJ	CAVEVPRVTGRRALTF	Primary Tumor	TRA	16	0.375	0.625	0.0625	0.25	0.1875	0.0625	0.3125	0.625	1775.08	10.2609	0.125	4.80625	0.534028	0.36875	0.30625	0.0625	4.80625	0.0280661	0.0548848	49.6	0.3125	0.125	0.25
TCGA-AR-A1AJ	CAHGPFSGGYNKLIF	Primary Tumor	TRA	15	0.4	0.533333	0.266667	0.0666667	0.0666667	0	0.133333	0.533333	1610.83	8.20636	0.0666667	4.68	0.52	0.3	0.18	0.2	4.68	0.24067	0.0079798	22.2933	0.333333	0.4	0.133333
TCGA-AR-A1AJ	CAHGPFSGGYNKLIF	Primary Tumor	TRA	15	0.4	0.533333	0.266667	0.0666667	0.0666667	0	0.133333	0.533333	1610.83	8.20636	0.0666667	4.68	0.52	0.3	0.18	0.2	4.68	0.24067	0.0079798	22.2933	0.333333	0.4	0.133333
TCGA-E9-A3HO	CAVRAPDSNYQLIW	Primary Tumor	TRA	14	0.285714	0.571429	0.142857	0.142857	0.0714286	0.0714286	0.214286	0.5	1635.84	5.82867	0	4.42857	0.492063	0.373571	-0.0714286	0.142857	4.42857	0.504908	0.0161728	31.4143	0.357143	0.214286	0.214286
TCGA-A2-A4S0	CLVGDDSGGSYIPTF	Primary Tumor	TRA	15	0.466667	0.733333	0.133333	0.133333	0	0.133333	0.2	0.6	1530.65	3.56366	-0.133333	4.79333	0.532593	0.298667	0.293333	0.133333	4.79333	0.299302	0.0309848	43.8867	0.333333	0.4	0.0666667
TCGA-A2-A4S0	CVVSDSGSQGNLIF	Primary Tumor	TRA	14	0.428571	0.714286	0.0714286	0.0714286	0	0.0714286	0.0714286	0.5	1425.56	3.79987	-0.0714286	5.09286	0.565873	0.279286	0.592857	0.0714286	5.09286	0.991678	0.00906148	25.35	0.357143	0.428571	0.0714286
TCGA-A8-A08C	CVVNDGQNFVF	Primary Tumor	TRA	11	0.181818	0.727273	0.181818	0.0909091	0	0.0909091	0.0909091	0.272727	1241.37	3.79987	-0.0909091	5.07273	0.563636	0.296364	0.572727	0.181818	5.07273	0.773514	0.00851098	-11.4273	0.454545	0.272727	0
TCGA-AN-A0AJ	CVVRSYGQNFVF	Primary Tumor	TRA	12	0.25	0.583333	0.25	0.0833333	0.0833333	0	0.0833333	0.333333	1418.62	8.22198	0.0833333	5.05833	0.562037	0.296667	0.558333	0.25	5.05833	0.965909	0.00861111	19.9	0.5	0.25	0
TCGA-AN-A0AJ	CAVNGGGTGGFKTIF	Primary Tumor	TRA	15	0.6	0.733333	0.133333	0.0666667	0.0666667	0	0.0666667	0.6	1428.61	8.22223	0.0666667	5.02	0.557778	0.257333	0.52	0.133333	5.02	0.920366	0.0079798	2.65333	0.266667	0.4	0.0666667
TCGA-AN-A0AJ	CIVRGIYNQGGKLIF	Primary Tumor	TRA	15	0.266667	0.4	0.133333	0.133333	0.133333	0	0.133333	0.4	1681.01	9.31244	0.133333	5.09333	0.565926	0.306667	0.593333	0.133333	5.09333	0.335604	0.00626263	-15.7667	0.466667	0.266667	0.0666667
TCGA-AN-A0AJ	CAGQLPGNRDDKIIF	Primary Tumor	TRA	15	0.266667	0.533333	0.0666667	0.266667	0.133333	0.133333	0.333333	0.6	1646.87	5.95343	0	4.17333	0.463704	0.360667	-0.326667	0.0666667	4.17333	0.147923	0.00391975	5.19333	0.266667	0.266667	0.133333
TCGA-AN-A0AJ	CVVGAGNNRKLIW	Primary Tumor	TRA	13	0.307692	0.615385	0.0769231	0.153846	0.153846	0	0.153846	0.384615	1429.69	9.50775	0.153846	4.8	0.533333	0.309231	0.3	0.0769231	4.8	0.830755	0.0313449	-22.6923	0.384615	0.307692	0.153846
TCGA-AN-A0AJ	CVVGAGNNRKLIW	Primary Tumor	TRA	13	0.307692	0.615385	0.0769231	0.153846	0.153846	0	0.153846	0.384615	1429.69	9.50775	0.153846	4.8	0.533333	0.309231	0.3	0.0769231	4.8	0.830755	0.0313449	-22.6923	0.384615	0.307692	0.153846
TCGA-AN-A0AJ	CVVKSGSSNTGKLIF	Primary Tumor	TRA	15	0.466667	0.666667	0.0666667	0.133333	0.133333	0	0.133333	0.533333	1539.79	9.31415	0.133333	4.95333	0.55037	0.301333	0.453333	0.0666667	4.95333	0.335604	0.00626263	-7.41333	0.333333	0.4	0.0666667
TCGA-AN-A0AJ	CAVNNARLMF	Primary Tumor	TRA	10	0.3	0.6	0.1	0.1	0.1	0	0.1	0.3	1138.36	8.24969	0.1	5.23	0.581111	0.307	0.73	0.1	5.23	0.653974	0.00777778	9	0.3	0.2	0.4
TCGA-AN-A0AJ	CAVNNARLMF	Primary Tumor	TRA	10	0.3	0.6	0.1	0.1	0.1	0	0.1	0.3	1138.36	8.24969	0.1	5.23	0.581111	0.307	0.73	0.1	5.23	0.653974	0.00777778	9	0.3	0.2	0.4
TCGA-AN-A0AJ	CAERGQAGTALIF	Primary Tumor	TRA	13	0.538462	0.538462	0.0769231	0.153846	0.0769231	0.0769231	0.153846	0.692308	1336.52	5.99493	0	4.96154	0.551282	0.313077	0.461538	0.0769231	4.96154	0.88717	0.00395833	-3.83077	0.230769	0.153846	0.384615
TCGA-A1-A0SF	CAAYSGGGADGLTF	Primary Tumor	TRA	14	0.714286	0.785714	0.142857	0.0714286	0	0.0714286	0.0714286	0.714286	1289.37	3.79987	-0.0714286	4.97143	0.552381	0.242857	0.471429	0.142857	4.97143	0.991678	0.00906148	23.6	0.214286	0.357143	0.285714
TCGA-A1-A0SF	CAASQSGGSYIPTF	Primary Tumor	TRA	14	0.642857	0.714286	0.142857	0	0	0	0.0714286	0.714286	1388.5	5.5174	0	4.72143	0.524603	0.330714	0.221429	0.142857	4.72143	0.899356	0	70	0.214286	0.428571	0.142857
TCGA-BH-A0W7	CAVRVNSGNTPLVF	Primary Tumor	TRA	14	0.357143	0.785714	0.0714286	0.0714286	0.0714286	0	0.142857	0.428571	1476.7	8.24969	0.0714286	5.10714	0.56746	0.343571	0.607143	0.0714286	5.10714	0.229255	0.00826959	-2.84286	0.357143	0.357143	0.142857
TCGA-BH-A0W7	CAVRDHNQGGKLIF	Primary Tumor	TRA	14	0.285714	0.5	0.142857	0.214286	0.142857	0.0714286	0.214286	0.571429	1557.78	8.23102	0.0714286	4.26429	0.47381	0.307857	-0.235714	0.0714286	4.26429	0.163533	0.0136974	17.5	0.285714	0.214286	0.142857
TCGA-BH-A0C0	CAVTGTDKLIF	Primary Tumor	TRA	11	0.454545	0.636364	0.0909091	0.181818	0.0909091	0.0909091	0.181818	0.545455	1167.37	5.82867	0	5.44545	0.605051	0.312727	0.945455	0.0909091	5.44545	0.562986	0.00517196	-29.5	0.363636	0.0909091	0.181818
TCGA-BH-A0C0	CTNAGKSTF	Primary Tumor	TRA	9	0.666667	0.777778	0.111111	0.111111	0.111111	0	0.111111	0.666667	928.021	8.22223	0.111111	4.17778	0.464198	0.292222	-0.322222	0.111111	4.17778	0.403179	0.00593827	32.6889	0.111111	0.333333	0.111111
TCGA-BH-A0C0	CLLLCRDPPFASGGSNYKLTF	Primary Tumor	TRA	21	0.380952	0.571429	0.142857	0.142857	0.0952381	0.047619	0.238095	0.52381	2302.67	8.04523	0.047619	4.71905	0.524339	0.332857	0.219048	0.142857	4.71905	0.380991	0.0104066	44.7476	0.333333	0.333333	0.238095
TCGA-BH-A0C0	CNERGGIQGAQKLVF	Primary Tumor	TRA	15	0.333333	0.466667	0.0666667	0.2	0.133333	0.0666667	0.2	0.6	1619.84	8.22223	0.0666667	4.23333	0.47037	0.326	-0.266667	0.0666667	4.23333	0.39112	0.0126571	-5.08	0.266667	0.266667	0.2
TCGA-BH-A0C0	CAMKWMGGSEKLVF	Primary Tumor	TRA	14	0.357143	0.428571	0.142857	0.214286	0.142857	0.0714286	0.214286	0.5	1586.94	8.19781	0.0714286	4.86429	0.540476	0.316429	0.364286	0.142857	4.86429	0.163533	0.0136974	42.7071	0.285714	0.214286	0.357143
TCGA-BH-A0C0	CAVMGGTSYGKLTF	Primary Tumor	TRA	14	0.571429	0.642857	0.142857	0.0714286	0.0714286	0	0.0714286	0.571429	1434.68	8.19745	0.0714286	5.1	0.566667	0.275714	0.6	0.142857	5.1	0.945517	0.00826959	2.65714	0.285714	0.285714	0.214286
TCGA-BH-A0C0	CITVLLNYGQNFVF	Primary Tumor	TRA	14	0.214286	0.5	0.214286	0	0	0	0	0.214286	1630.9	5.5174	0	5.62143	0.624603	0.286429	1.12143	0.214286	5.62143	-1	0	-7.51429	0.571429	0.214286	0.142857
TCGA-BH-A0C0	CIPRDGAISNFGNEKLTF	Primary Tumor	TRA	18	0.333333	0.555556	0.111111	0.222222	0.111111	0.111111	0.277778	0.555556	1982.22	6.06256	0	4.3	0.477778	0.333333	-0.2	0.111111	4.3	0.4239	0.00499389	-11.9889	0.277778	0.333333	0.166667
TCGA-BH-A0C0	CRHLLLCWAGGGASNTGKLIF	Primary Tumor	TRA	21	0.47619	0.52381	0.142857	0.0952381	0.0952381	0	0.0952381	0.52381	2217.61	8.95721	0.0952381	5.07143	0.563492	0.261905	0.571429	0.0952381	5.07143	0.574255	0.00866238	14.3524	0.333333	0.285714	0.285714
TCGA-BH-A0C0	CNERGGIQGAQKLVF	Primary Tumor	TRA	15	0.333333	0.466667	0.0666667	0.2	0.133333	0.0666667	0.2	0.6	1619.84	8.22223	0.0666667	4.23333	0.47037	0.326	-0.266667	0.0666667	4.23333	0.39112	0.0126571	-5.08	0.266667	0.266667	0.2
TCGA-BH-A0C0	CASSSFGGAQKLVF	Primary Tumor	TRA	14	0.571429	0.642857	0.142857	0.0714286	0.0714286	0	0.0714286	0.642857	1401.59	8.22223	0.0714286	5.15	0.572222	0.287857	0.65	0.142857	5.15	0.945517	0.00826959	33.4857	0.285714	0.357143	0.214286
TCGA-BH-A0C0	CAVNANSGGSNYKLTF	Primary Tumor	TRA	16	0.5	0.75	0.125	0.0625	0.0625	0	0.0625	0.5	1645.79	8.19745	0.0625	4.38125	0.486806	0.279375	-0.11875	0.125	4.38125	0.90155	0.00766888	19.4937	0.25	0.4375	0.1875
TCGA-BH-A0C0	CALSEAGGGADGLTF	Primary Tumor	TRA	15	0.666667	0.733333	0.0666667	0.133333	0	0.133333	0.133333	0.733333	1368.47	3.66595	-0.133333	5.04667	0.560741	0.254	0.546667	0.0666667	5.04667	0.145735	0.00338384	35.5333	0.2	0.333333	0.4
TCGA-BH-A0C0	CAASYNNDMRF	Primary Tumor	TRA	11	0.363636	0.636364	0.181818	0.181818	0.0909091	0.0909091	0.181818	0.454545	1291.41	5.82867	0	3.92727	0.436364	0.293636	-0.572727	0.181818	3.92727	0.645799	0.0103439	2.23636	0.181818	0.272727	0.272727
TCGA-BH-A0C0	CAYGLRNNDMRF	Primary Tumor	TRA	12	0.25	0.5	0.166667	0.25	0.166667	0.0833333	0.25	0.416667	1459.65	8.22186	0.0833333	3.8	0.422222	0.280833	-0.7	0.166667	3.8	0.18545	0.0101565	22.1417	0.25	0.25	0.25
TCGA-BH-A0C0	CAPRPGNTDKLIF	Primary Tumor	TRA	13	0.307692	0.615385	0.0769231	0.230769	0.153846	0.0769231	0.384615	0.615385	1431.66	8.22211	0.0769231	4.16923	0.463248	0.413846	-0.330769	0.0769231	4.16923	0.00358138	0.0125253	6.93846	0.230769	0.307692	0.153846
TCGA-BH-A0C0	CTNAGKSTF	Primary Tumor	TRA	9	0.666667	0.777778	0.111111	0.111111	0.111111	0	0.111111	0.666667	928.021	8.22223	0.111111	4.17778	0.464198	0.292222	-0.322222	0.111111	4.17778	0.403179	0.00593827	32.6889	0.111111	0.333333	0.111111
TCGA-BH-A0C0	CTNAGKSTF	Primary Tumor	TRA	9	0.666667	0.777778	0.111111	0.111111	0.111111	0	0.111111	0.666667	928.021	8.22223	0.111111	4.17778	0.464198	0.292222	-0.322222	0.111111	4.17778	0.403179	0.00593827	32.6889	0.111111	0.333333	0.111111
TCGA-BH-A0C0	CRECDYGQNFVF	Primary Tumor	TRA	12	0.25	0.5	0.25	0.25	0.0833333	0.166667	0.25	0.416667	1480.62	4.37018	-0.0833333	4.05	0.45	0.2925	-0.45	0.25	4.05	0.60151	0.0223457	42.2333	0.333333	0.166667	0.0833333
TCGA-BH-A0C0	CIVRAGCLSSGSARQLTF	Primary Tumor	TRA	18	0.555556	0.611111	0.0555556	0.111111	0.111111	0	0.111111	0.611111	1869.17	9.0235	0.111111	5.12778	0.569753	0.292222	0.627778	0.0555556	5.12778	0.434204	0.00771198	43.6833	0.277778	0.277778	0.222222
TCGA-BH-A0C0	CAVSGVDSSYKLIF	Primary Tumor	TRA	14	0.428571	0.642857	0.142857	0.142857	0.0714286	0.0714286	0.142857	0.5	1488.7	5.82794	0	5.37857	0.597619	0.297143	0.878571	0.142857	5.37857	0.358186	0.0232593	20	0.428571	0.285714	0.142857
TCGA-BH-A0C0	CAPSDTGGFKTIF	Primary Tumor	TRA	13	0.538462	0.692308	0.153846	0.153846	0.0769231	0.0769231	0.230769	0.692308	1343.5	5.82867	0	4.68462	0.520513	0.334615	0.184615	0.153846	4.68462	0.0761487	0.0321528	18.7	0.230769	0.307692	0.0769231
TCGA-BH-A0C0	CAPSDTGGFKTIF	Primary Tumor	TRA	13	0.538462	0.692308	0.153846	0.153846	0.0769231	0.0769231	0.230769	0.692308	1343.5	5.82867	0	4.68462	0.520513	0.334615	0.184615	0.153846	4.68462	0.0761487	0.0321528	18.7	0.230769	0.307692	0.0769231
TCGA-BH-A0C0	CAPSDTGGFKTIF	Primary Tumor	TRA	13	0.538462	0.692308	0.153846	0.153846	0.0769231	0.0769231	0.230769	0.692308	1343.5	5.82867	0	4.68462	0.520513	0.334615	0.184615	0.153846	4.68462	0.0761487	0.0321528	18.7	0.230769	0.307692	0.0769231
TCGA-B6-A0IH	CYGGSQGNLIF	Primary Tumor	TRA	11	0.454545	0.545455	0.181818	0	0	0	0	0.454545	1158.28	5.5174	0	4.8	0.533333	0.248182	0.3	0.181818	4.8	-1	0	22.3818	0.363636	0.454545	0.0909091
TCGA-B6-A0IH	CYGGSQGNLIF	Primary Tumor	TRA	11	0.454545	0.545455	0.181818	0	0	0	0	0.454545	1158.28	5.5174	0	4.8	0.533333	0.248182	0.3	0.181818	4.8	-1	0	22.3818	0.363636	0.454545	0.0909091
TCGA-B6-A0IH	CATVRDQTGANNLFF	Primary Tumor	TRA	15	0.4	0.666667	0.133333	0.133333	0.0666667	0.0666667	0.133333	0.533333	1656.82	5.82941	0	4.46	0.495556	0.298667	-0.04	0.133333	4.46	0.949045	0.00502525	-1.98667	0.266667	0.2	0.2
TCGA-B6-A0IH	CIVRVAGAGGTSYGKLTF	Primary Tumor	TRA	18	0.555556	0.666667	0.111111	0.111111	0.111111	0	0.111111	0.611111	1800.09	9.31244	0.111111	5.17222	0.574691	0.286667	0.672222	0.111111	5.17222	0.479985	0.00822683	-5.14444	0.333333	0.277778	0.166667
TCGA-B6-A0IH	CIVRVAGAGGTSYGKLTF	Primary Tumor	TRA	18	0.555556	0.666667	0.111111	0.111111	0.111111	0	0.111111	0.611111	1800.09	9.31244	0.111111	5.17222	0.574691	0.286667	0.672222	0.111111	5.17222	0.479985	0.00822683	-5.14444	0.333333	0.277778	0.166667
TCGA-B6-A0IH	CIVRVAGAGGTSYGKLTF	Primary Tumor	TRA	18	0.555556	0.666667	0.111111	0.111111	0.111111	0	0.111111	0.611111	1800.09	9.31244	0.111111	5.17222	0.574691	0.286667	0.672222	0.111111	5.17222	0.479985	0.00822683	-5.14444	0.333333	0.277778	0.166667
TCGA-B6-A0IH	CIVRVAGAGGTSYGKLTF	Primary Tumor	TRA	18	0.555556	0.666667	0.111111	0.111111	0.111111	0	0.111111	0.611111	1800.09	9.31244	0.111111	5.17222	0.574691	0.286667	0.672222	0.111111	5.17222	0.479985	0.00822683	-5.14444	0.333333	0.277778	0.166667
TCGA-B6-A0IH	CIVRVAGAGGTSYGKLTF	Primary Tumor	TRA	18	0.555556	0.666667	0.111111	0.111111	0.111111	0	0.111111	0.611111	1800.09	9.31244	0.111111	5.17222	0.574691	0.286667	0.672222	0.111111	5.17222	0.479985	0.00822683	-5.14444	0.333333	0.277778	0.166667
TCGA-B6-A0IH	CWASSGNTPLVF	Primary Tumor	TRA	12	0.5	0.75	0.166667	0	0	0	0.0833333	0.5	1281.44	5.51813	0	5.03333	0.559259	0.3225	0.533333	0.166667	5.03333	0.965909	0	18.275	0.333333	0.416667	0.166667
TCGA-B6-A0IH	CWASSGNTPLVF	Primary Tumor	TRA	12	0.5	0.75	0.166667	0	0	0	0.0833333	0.5	1281.44	5.51813	0	5.03333	0.559259	0.3225	0.533333	0.166667	5.03333	0.965909	0	18.275	0.333333	0.416667	0.166667
TCGA-AN-A0AM	CAVRDVSGYSTLTF	Primary Tumor	TRA	14	0.5	0.714286	0.142857	0.142857	0.0714286	0.0714286	0.142857	0.571429	1518.69	5.82867	0	4.97143	0.552381	0.285	0.471429	0.142857	4.97143	0.922771	0.00354321	12.0357	0.357143	0.214286	0.142857
TCGA-AN-A0AM	CATSMIKAAGNKLTF	Primary Tumor	TRA	15	0.533333	0.6	0.0666667	0.133333	0.133333	0	0.133333	0.6	1555.86	9.31415	0.133333	4.96667	0.551852	0.328	0.466667	0.0666667	4.96667	0.285092	0.00676768	16.3667	0.2	0.2	0.333333
TCGA-AN-A0AM	CAGIPQRRGGSQGNLIF	Primary Tumor	TRA	17	0.411765	0.529412	0.0588235	0.117647	0.117647	0	0.176471	0.647059	1774.01	10.3519	0.117647	4.28824	0.476471	0.332941	-0.211765	0.0588235	4.28824	0.655872	0.0292887	56.3471	0.235294	0.411765	0.117647
TCGA-AN-A0AM	CAAISETSGSRLTF	Primary Tumor	TRA	14	0.642857	0.642857	0.0714286	0.142857	0.0714286	0.0714286	0.142857	0.714286	1442.59	5.99493	0	4.85714	0.539683	0.291429	0.357143	0.0714286	4.85714	0.156361	0.0303457	45.6143	0.214286	0.285714	0.285714
TCGA-AN-A0AM	CGPGGSQGNLIF	Primary Tumor	TRA	12	0.5	0.666667	0.0833333	0	0	0	0.0833333	0.583333	1149.28	5.51813	0	4.71667	0.524074	0.300833	0.216667	0.0833333	4.71667	0.977273	0	28.425	0.25	0.583333	0.0833333
TCGA-AN-A0AM	CGPGGSQGNLIF	Primary Tumor	TRA	12	0.5	0.666667	0.0833333	0	0	0	0.0833333	0.583333	1149.28	5.51813	0	4.71667	0.524074	0.300833	0.216667	0.0833333	4.71667	0.977273	0	28.425	0.25	0.583333	0.0833333
TCGA-AN-A0AM	CCPAHGSGNTGKLIF	Primary Tumor	TRA	15	0.533333	0.666667	0.133333	0.0666667	0.0666667	0	0.133333	0.6	1504.73	8.06805	0.0666667	4.7	0.522222	0.31	0.2	0.0666667	4.7	0.430539	0.0079798	-5.86	0.2	0.4	0.133333
TCGA-AN-A0AM	CAFMPDGGATNKLIF	Primary Tumor	TRA	15	0.4	0.6	0.133333	0.133333	0.0666667	0.0666667	0.2	0.533333	1584.86	5.82867	0	5.02667	0.558519	0.335333	0.526667	0.133333	5.02667	0.17495	0.0302525	36.2733	0.266667	0.266667	0.266667
TCGA-AN-A0AM	CALSVWDDYKLSF	Primary Tumor	TRA	13	0.307692	0.538462	0.230769	0.230769	0.0769231	0.153846	0.230769	0.461538	1546.74	4.20782	-0.0769231	4.82308	0.535897	0.292308	0.323077	0.230769	4.82308	0.376725	0.0325734	2.7	0.461538	0.153846	0.230769
[truncated: 2,409 more rows]
